# Supplementary material for: Seed Transmission of Pathogens: Non-Canonical Immune Response in Arabidopsis Germinating Seeds Compared to Early Seedlings against the Necrotrophic Fungus Alternaria brassicicola
Source: MDPI journal article supplement (doi:10.3390/plants11131708), 2022-06-28
Supplement: s1 [file s1]

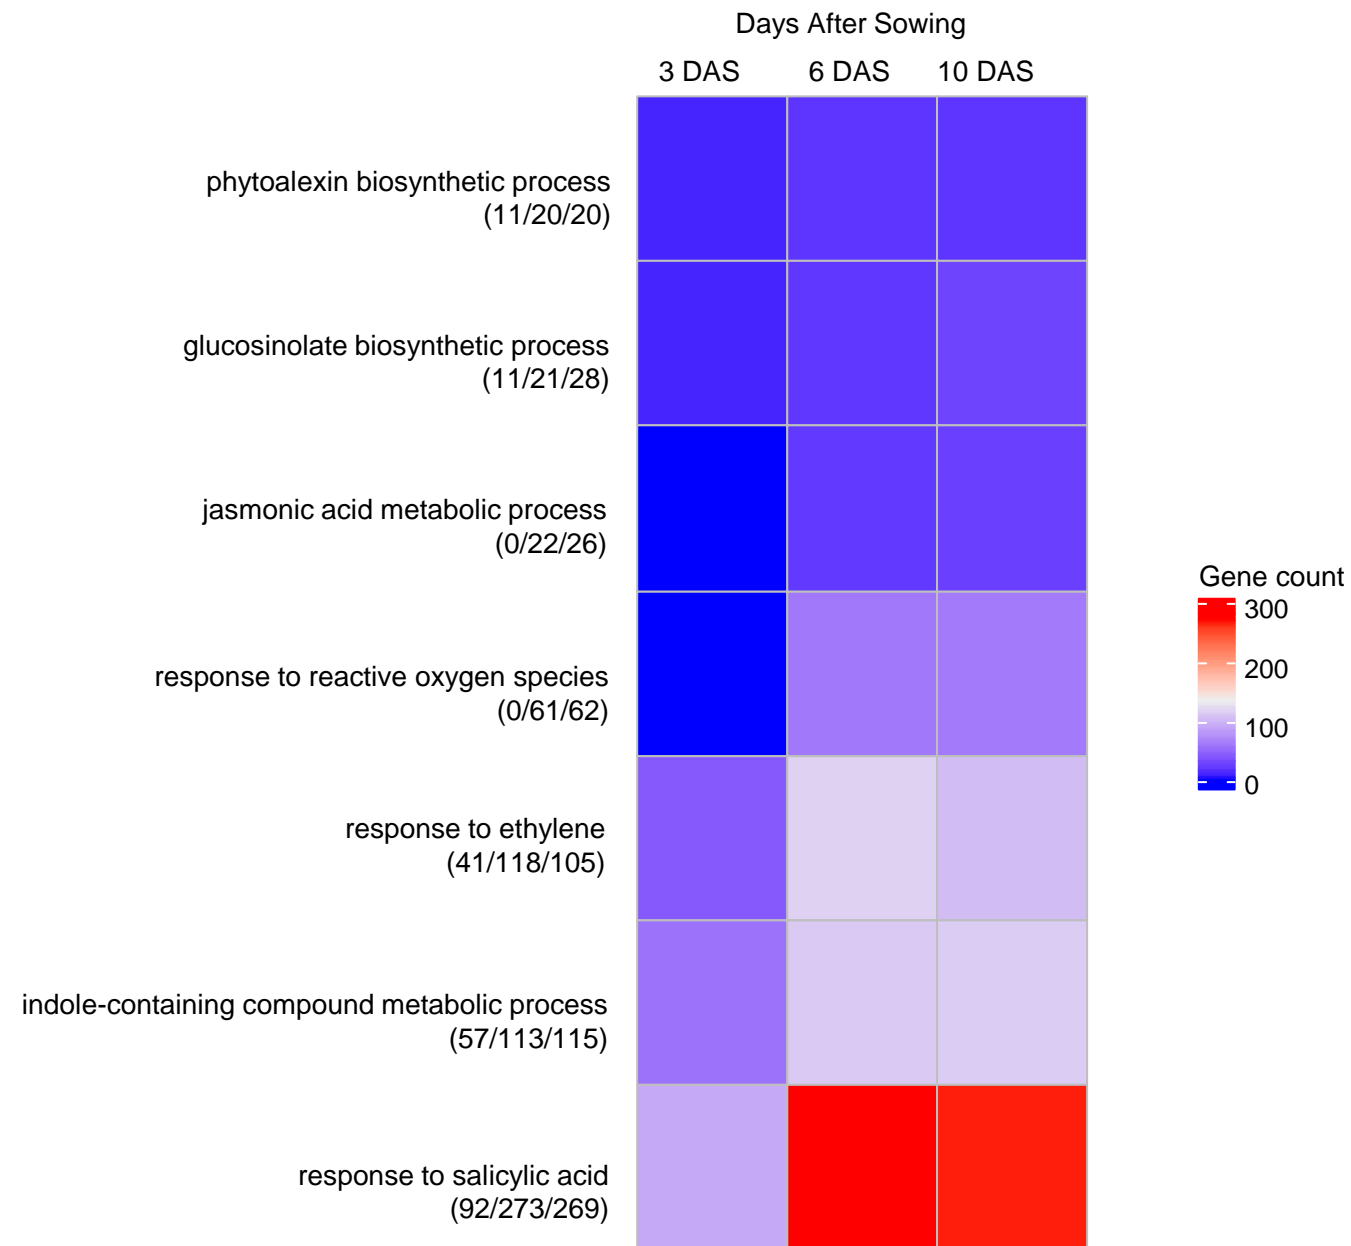

**Supplementary Figure S1:** Number of differentially expressed genes (DEGs) assigned to SA, JA, ET, indole and ROS pathways. Heatmap shows the number of DEGs assigned to these biological processes at 3, 6 and 10 days after sowing (DAS). Colour scale is based on the number of genes counted for each GO term, the scale colour goes from blue to red, starting at 0 and ending at 273 for our data.
