# Supplementary material for: Seed Transmission of Pathogens: Non-Canonical Immune Response in Arabidopsis Germinating Seeds Compared to Early Seedlings against the Necrotrophic Fungus Alternaria brassicicola
Source: Plants (Basel). 2022 Jun 28;11(13):1708. doi: 10.3390/plants11131708 (PMC9269218; doi:10.3390/plants11131708)
Supplement: Supplementary file 1 [file plants-11-01708-s001.zip]

Archive with 6 entries (6 files):
- Supplementary Figure S1. Heatmap Number of DEGs _GO defense.pdf
- Supplementary Table S1. DEGs.xlsx
- Supplementary Table S2. Enriched GO terms analysis .xlsx
- Supplementary Table S3. Heatmap for the number DEGs _GO defense.xlsx
- Supplementary Table S4. Data supporting mutants phenotyping figures (mutant phenotyping).xlsx
- Supplementary Table S5. Comparison DEGs induced by A. brassicicola .xlsx
