# Supplementary material for: Seed Transmission of Pathogens: Non-Canonical Immune Response in Arabidopsis Germinating Seeds Compared to Early Seedlings against the Necrotrophic Fungus Alternaria brassicicola
Source: Plants (Basel). 2022 Jun 28;11(13):1708. doi: 10.3390/plants11131708 (PMC9269218; doi:10.3390/plants11131708)
Supplement: Supplementary file 1 [file plants-11-01708-s001.zip › Supplementary Table S1. DEGs.xlsx]

## Sheet: 3DAS
Supplementary Table S1: Differentially expressed genes (DEGs) between healthy and A. brassicicola infected samples at 3, 6 and 10 days after sowing (DAS). Genes with log2FC > 1 or < −1 and Benjamini-Hochberg adjusted p-value < 0.05 were considered as differentially expressed. Gene symbol and TAIR description were taken from The Arabidopsis Information Resource (TAIR)
3 days after sowing (DAS)
geneID	log2(FC)	P-adj	Gene Symbol	TAIR Description
AT1G01010	-0.894438	0.00199177	NAC001	NAC domain containing protein 1;(source:Araport11)
AT1G01070	-1.1884	0.000156886	UMAMIT28	nodulin MtN21 /EamA-like transporter family protein;(source:Araport11)
AT1G01090	-0.539234	0.00933315	PDH-E1 ALPHA	pyruvate dehydrogenase E1 alpha;(source:Araport11)
AT1G01100	0.493192	0.0011152	AT1G01100	60S acidic ribosomal protein family;(source:Araport11)
AT1G01120	-0.715317	0.00160429	KCS1	3-ketoacyl-CoA synthase 1;(source:Araport11)
AT1G01160	0.431256	0.00784861	GIF2	GRF1-interacting factor 2;(source:Araport11)
AT1G01170	0.598379	0.00560082	AT1G01170	ozone-responsive stress-like protein (DUF1138);(source:Araport11)
AT1G01340	1.39301	3.61682e-06	CNGC10	cyclic nucleotide gated channel 10;(source:Araport11)
AT1G01453	-0.769752	0.0133872	AT1G01453	late embryogenesis abundant hydroxyproline-rich glycoprotein family protein;(source:Araport11)
AT1G01480	1.22602	0.00338108	ACS2	1-amino-cyclopropane-1-carboxylate synthase 2;(source:Araport11)
AT1G01580	0.814146	0.0103415	FRO2	ferric reduction oxidase 2;(source:Araport11)
AT1G01620	-0.850875	0.000403542	PIP1C	plasma membrane intrinsic protein 1C;(source:Araport11)
AT1G01680	-1.29879	0.0151046	PUB54	plant U-box 54;(source:Araport11)
AT1G01750	-0.871741	0.00427619	ADF11	actin depolymerizing factor 11;(source:Araport11)
AT1G01790	-0.723867	0.000128806	KEA1	K+ efflux antiporter 1;(source:Araport11)
AT1G01920	0.676684	0.00440664	AT1G01920	SET domain-containing protein;(source:Araport11)
AT1G01990	0.71601	0.0021135	AT1G01990	hypothetical protein;(source:Araport11)
AT1G02000	-0.583058	0.00128094	GAE2	UDP-D-glucuronate 4-epimerase 2;(source:Araport11)
AT1G02050	0.67034	0.0119816	LAP6	Chalcone and stilbene synthase family protein;(source:Araport11)
AT1G02100	0.323225	0.0359192	SBI1	Leucine carboxyl methyltransferase;(source:Araport11)
AT1G02160	0.666373	0.0168394	AT1G02160	Cox19 family protein (CHCH motif);(source:Araport11)
AT1G02230	-1.10042	0.0417609	NAC004	NAC domain containing protein 4;(source:Araport11)
AT1G02280	0.45532	0.0389733	TOC33	translocon at the outer envelope membrane of chloroplasts 33;(source:Araport11)
AT1G02335	-1.15092	0.00717034	GL22	germin-like protein subfamily 2 member 2 precursor;(source:Araport11)
AT1G02360	0.961876	0.0240265	AT1G02360	Chitinase family protein;(source:Araport11)
AT1G02410	0.547723	0.0222422	AT1G02410	cytochrome c oxidase assembly protein CtaG / Cox11 family;(source:Araport11)
AT1G02520	-0.843134	0.00533557	ABCB11	P-glycoprotein 11;(source:Araport11)
AT1G02570	-1.41629	0.00434282	AT1G02570	transmembrane protein;(source:Araport11)
AT1G02660	-0.655712	0.0277684	AT1G02660	alpha/beta-Hydrolases superfamily protein;(source:Araport11)
AT1G02730	-0.803502	0.0070683	CSLD5	cellulose synthase-like D5;(source:Araport11)
AT1G02816	-0.501789	0.0201402	AT1G02816	pectinesterase (Protein of unknown function, DUF538);(source:Araport11)
AT1G02840	0.446166	0.000720232	SR34	RNA-binding (RRM/RBD/RNP motifs) family protein;(source:Araport11)
AT1G02870	0.52942	0.00529507	AT1G02870	nucleolar-like protein;(source:Araport11)
AT1G02890	-0.396332	0.0467571	AT1G02890	AAA-type ATPase family protein;(source:Araport11)
AT1G02920	4.12487	9.26448e-78	GSTF7	glutathione S-transferase 7;(source:Araport11)
AT1G02930	3.85165	1.30747e-111	GSTF6	glutathione S-transferase 6;(source:Araport11)
AT1G02940	2.19285	4.01834e-12	GSTF5	glutathione S-transferase (class phi) 5;(source:Araport11)
AT1G03070	-1.23328	0.0176698	AT1G03070	Bax inhibitor-1 family protein;(source:Araport11)
AT1G03080	-0.486989	0.000611923	NET1D	kinase interacting (KIP1-like) family protein;(source:Araport11)
AT1G03106	0.94727	0.0246718	AT1G03106	hypothetical protein;(source:Araport11)
AT1G03220	1.66384	1.34762e-11	AT1G03220	Eukaryotic aspartyl protease family protein;(source:Araport11)
AT1G03230	0.73432	0.000924126	AT1G03230	Eukaryotic aspartyl protease family protein;(source:Araport11)
AT1G03350	-0.44327	0.021019	AT1G03350	BSD domain-containing protein;(source:Araport11)
AT1G03610	1.31727	7.78309e-13	AT1G03610	plant/protein (DUF789);(source:Araport11)
AT1G03630	-0.523721	0.010051	POR C	protochlorophyllide oxidoreductase C;(source:Araport11)
AT1G03760	0.824986	0.000693608	AT1G03760	Prefoldin chaperone subunit family protein;(source:Araport11)
AT1G03850	-0.921101	0.0124314	GRXS13	Glutaredoxin family protein;(source:Araport11)
AT1G03870	-0.931476	5.02227e-05	FLA9	FASCICLIN-like arabinoogalactan 9;(source:Araport11)
AT1G03880	1.15723	0.00616806	CRU2	cruciferin 2;(source:Araport11)
AT1G03900	0.284272	0.0209115	ABCI18	non-intrinsic ABC protein 4;(source:Araport11)
AT1G03905	0.735345	0.0052184	ABCI19	P-loop containing nucleoside triphosphate hydrolases superfamily protein;(source:Araport11)
AT1G04120	-0.398105	0.0324743	ABCC5	multidrug resistance-associated protein 5;(source:Araport11)
AT1G04160	-0.463681	0.00862067	XIB	myosin XI B;(source:Araport11)
AT1G04180	-1.38027	0.00359958	YUC9	YUCCA 9;(source:Araport11)
AT1G04250	-0.973951	2.08348e-11	AXR3	AUX/IAA transcriptional regulator family protein;(source:Araport11)
AT1G04400	-0.383863	0.0201378	CRY2	cryptochrome 2;(source:Araport11)
AT1G04480	0.765166	5.33248e-06	AT1G04480	Ribosomal protein L14p/L23e family protein;(source:Araport11)
AT1G04540	1.20263	0.0207026	AT1G04540	Calcium-dependent lipid-binding (CaLB domain) family protein;(source:Araport11)
AT1G04700	-0.954646	0.0021135	AT1G04700	PB1 domain-containing protein tyrosine kinase;(source:Araport11)
AT1G04790	0.438346	0.0250389	AT1G04790	RING/U-box superfamily protein;(source:Araport11)
AT1G05000	-0.641998	0.0273109	PFA-DSP1	Phosphotyrosine protein phosphatases superfamily protein;(source:Araport11)
AT1G05090	0.617917	0.0390463	AT1G05090	dentin sialophosphoprotein-like protein;(source:Araport11)
AT1G05150	-0.442259	0.0428607	AT1G05150	Calcium-binding tetratricopeptide family protein;(source:Araport11)
AT1G05160	0.491135	0.0221664	CYP88A3	cytochrome P450, family 88, subfamily A, polypeptide 3;(source:Araport11)
AT1G05260	-1.0669	1.08177e-08	RCI3	Peroxidase superfamily protein;(source:Araport11)
AT1G05530	-1.54854	0.00112132	UGT75B2	UDP-glucosyl transferase 75B2;(source:Araport11)
AT1G05560	-1.14169	7.10249e-05	UGT75B1	UDP-glucosyltransferase 75B1;(source:Araport11)
AT1G05570	-1.10068	4.07405e-16	CALS1	callose synthase 1;(source:Araport11)
AT1G05575	1.36022	0.000403818	AT1G05575	transmembrane protein;(source:Araport11)
AT1G05660	-1.33471	0.000176398	AT1G05660	Pectin lyase-like superfamily protein;(source:Araport11)
AT1G05675	3.26574	5.99015e-20	AT1G05675	UDP-Glycosyltransferase superfamily protein;(source:Araport11)
AT1G05700	1.32488	1.11998e-05	AT1G05700	Leucine-rich repeat transmembrane protein kinase protein;(source:Araport11)
AT1G05710	0.788774	0.0379048	AT1G05710	basic helix-loop-helix (bHLH) DNA-binding superfamily protein;(source:Araport11)
AT1G05880	1.21207	0.0161829	ARI12	RING/U-box superfamily protein;(source:Araport11)
AT1G05890	0.36385	0.02806	ARI5	RING/U-box superfamily protein;(source:Araport11)
AT1G05960	-0.395636	0.00453436	AT1G05960	ARM repeat superfamily protein;(source:Araport11)
AT1G06090	-2.25203	1.68729e-11	AT1G06090	Fatty acid desaturase family protein;(source:Araport11)
AT1G06120	-2.14115	7.78441e-07	AT1G06120	Fatty acid desaturase family protein;(source:Araport11)
AT1G06135	2.01289	3.26724e-05	AT1G06135	transmembrane protein;(source:Araport11)
AT1G06137	2.52473	5.71956e-08	AT1G06137	transmembrane protein;(source:Araport11)
AT1G06390	0.362738	0.0140028	GSK1	GSK3/SHAGGY-like protein kinase 1;(source:Araport11)
AT1G06410	-0.503218	0.0452066	TPS7	trehalose-phosphatase/synthase 7;(source:Araport11)
AT1G06460	-0.449143	0.033218	ACD32.1	alpha-crystallin domain 32.1;(source:Araport11)
AT1G06515	0.540523	0.0169118	AT1G06515	transmembrane protein, putative (DUF3317);(source:Araport11)
AT1G06680	-0.562016	0.00116556	PSBP-1	photosystem II subunit P-1;(source:Araport11)
AT1G06800	0.659042	0.00999728	PLA-I{gamma}1	alpha/beta-Hydrolases superfamily protein;(source:Araport11)
AT1G06923	-0.998347	0.0422903	AT1G06923	transcription repressor OFP17-like protein;(source:Araport11)
AT1G07040	-0.593308	0.0137842	AT1G07040	plant/protein;(source:Araport11)
AT1G07130	0.92529	0.0476859	STN1	Nucleic acid-binding, OB-fold-like protein;(source:Araport11)
AT1G07135	1.49073	3.67109e-07	AT1G07135	glycine-rich protein;(source:Araport11)
AT1G07160	1.97025	1.96401e-07	AT1G07160	Protein phosphatase 2C family protein;(source:Araport11)
AT1G07170	0.556824	0.0233002	AT1G07170	PHF5-like protein;(source:Araport11)
AT1G07310	-0.487434	0.00743702	AT1G07310	Calcium-dependent lipid-binding (CaLB domain) family protein;(source:Araport11)
AT1G07590	-1.40869	6.3403e-06	AT1G07590	Tetratricopeptide repeat (TPR)-like superfamily protein;(source:Araport11)
AT1G07610	-1.40819	0.000305297	MT1C	metallothionein 1C;(source:Araport11)
AT1G07620	1.93381	2.21718e-06	ATOBGM	GTP-binding protein Obg/CgtA;(source:Araport11)
AT1G07720	-0.715674	0.000125524	KCS3	3-ketoacyl-CoA synthase 3;(source:Araport11)
AT1G07730	-1.28095	0.00893199	AT1G07730
AT1G07750	-0.427909	0.0282959	AT1G07750	RmlC-like cupins superfamily protein;(source:Araport11)
AT1G07770	0.387411	0.0155149	RPS15A	ribosomal protein S15A;(source:Araport11)
AT1G08090	-1.78583	9.96633e-07	NRT2:1	nitrate transporter 2:1;(source:Araport11)
AT1G08160	-1.00914	3.80428e-06	AT1G08160	Late embryogenesis abundant (LEA) hydroxyproline-rich glycoprotein family;(source:Araport11)
AT1G08190	-0.413095	0.0368134	VPS41	vacuolar protein sorting 41;(source:Araport11)
AT1G08210	0.73009	0.000233654	AT1G08210	Eukaryotic aspartyl protease family protein;(source:Araport11)
AT1G08340	-0.94267	0.00722531	AT1G08340	Rho GTPase activating protein with PAK-box/P21-Rho-binding domain-containing protein;(source:Araport11)
AT1G08430	-1.47914	0.00263409	ALMT1	aluminum-activated malate transporter 1;(source:Araport11)
AT1G08540	-0.475065	0.0190807	SIG2	RNApolymerase sigma subunit 2;(source:Araport11)
AT1G08590	-0.560549	0.0141803	AT1G08590	Leucine-rich receptor-like protein kinase family protein;(source:Araport11)
AT1G08630	1.30071	0.00704459	THA1	threonine aldolase 1;(source:Araport11)
AT1G08650	-0.722953	0.0389235	PPCK1	phosphoenolpyruvate carboxylase kinase 1;(source:Araport11)
AT1G08800	-0.498207	0.00607007	AT1G08800	myosin-binding protein (Protein of unknown function, DUF593);(source:Araport11)
AT1G08910	0.810291	0.0001796	AT1G08910	zinc ion binding protein;(source:Araport11)
AT1G08920	-0.585803	0.00768243	ESL1	ERD (early response to dehydration) six-like 1;(source:Araport11)
AT1G08930	0.718122	0.00828762	ERD6	Major facilitator superfamily protein;(source:Araport11)
AT1G08940	0.70217	0.0417839	AT1G08940	Phosphoglycerate mutase family protein;(source:Araport11)
AT1G08990	-1.46485	0.000156905	PGSIP5	plant glycogenin-like starch initiation protein 5;(source:Araport11)
AT1G09080	1.37949	0.0016906	BIP3	Heat shock protein 70 (Hsp 70) family protein;(source:Araport11)
AT1G09170	-0.844729	0.00600479	AT1G09170	P-loop nucleoside triphosphate hydrolases superfamily protein with CH (Calponin Homology) domain-containing protein;(source:Araport11)
AT1G09270	-0.461251	0.00131511	IMPA-4	importin alpha isoform 4;(source:Araport11)
AT1G09280	0.672019	0.00108635	AT1G09280	rhodanese-like domain protein;(source:Araport11)
AT1G09340	-0.65211	2.55653e-07	CRB	chloroplast RNA binding protein;(source:Araport11)
AT1G09430	-0.360086	0.0449952	ACLA-3	ATP-citrate lyase A-3;(source:Araport11)
AT1G09480	1.01089	0.0249603	AT1G09480	NAD(P)-binding Rossmann-fold superfamily protein;(source:Araport11)
AT1G09540	-1.07276	0.000122973	MYB61	myb domain protein 61;(source:Araport11)
AT1G09570	-0.494252	0.0105698	PHYA	phytochrome A;(source:Araport11)
AT1G09740	-1.03	0.012826	AT1G09740	Adenine nucleotide alpha hydrolases-like superfamily protein;(source:Araport11)
AT1G09750	-0.408196	0.0209266	AT1G09750	Eukaryotic aspartyl protease family protein;(source:Araport11)
AT1G09812	1.11706	0.028787	AT1G09812	multidrug resistance protein;(source:Araport11)
AT1G09930	1.09086	0.0405421	OPT2	oligopeptide transporter 2;(source:Araport11)
AT1G09932	1.15052	0.0148517	AT1G09932	Phosphoglycerate mutase family protein;(source:Araport11)
AT1G09940	0.765355	5.76267e-07	HEMA2	Glutamyl-tRNA reductase family protein;(source:Araport11)
AT1G10000	0.973189	0.00883756	AT1G10000	Ribonuclease H-like superfamily protein;(source:Araport11)
AT1G10090	-0.334089	0.0498154	AT1G10090	Early-responsive to dehydration stress protein (ERD4);(source:Araport11)
AT1G10140	1.29331	0.000465803	AT1G10140	Uncharacterized conserved protein UCP031279;(source:Araport11)
AT1G10200	-0.535388	0.000118311	WLIM1	GATA type zinc finger transcription factor family protein;(source:Araport11)
AT1G10380	-0.662425	0.00377721	AT1G10380	Putative membrane lipoprotein;(source:Araport11)
AT1G10385	-0.928567	0.0472051	AT1G10385	Vps51/Vps67 family (components of vesicular transport) protein;(source:Araport11)
AT1G10390	-0.422101	0.0475125	AT1G10390	Nucleoporin autopeptidase;(source:Araport11)
AT1G10550	-0.78869	0.0176968	XTH33	xyloglucan:xyloglucosyl transferase 33;(source:Araport11)
AT1G10610	0.662756	0.0215159	AT1G10610	basic helix-loop-helix (bHLH) DNA-binding superfamily protein;(source:Araport11)
AT1G10660	0.479596	0.00597169	AT1G10660	transmembrane protein;(source:Araport11)
AT1G10690	0.664107	0.0158792	AT1G10690	cyclin-dependent kinase inhibitor;(source:Araport11)
AT1G10700	0.616428	0.00241428	PRS3	phosphoribosyl pyrophosphate (PRPP) synthase 3;(source:Araport11)
AT1G10740	0.570346	0.000574103	AT1G10740	alpha/beta-Hydrolases superfamily protein;(source:Araport11)
AT1G10840	0.544531	2.43029e-05	TIF3H1	translation initiation factor 3 subunit H1;(source:Araport11)
AT1G10890	0.533709	0.019448	AT1G10890	arginine/glutamate-rich 1 protein;(source:Araport11)
AT1G10990	1.37881	3.75426e-06	AT1G10990	transmembrane protein;(source:Araport11)
AT1G11080	-1.17959	0.018806	scpl31	serine carboxypeptidase-like 31;(source:Araport11)
AT1G11120	0.695288	0.00938123	AT1G11120	CTTNBP 2 amino-terminal-like protein;(source:Araport11)
AT1G11160	-0.806303	0.0196369	AT1G11160	Transducin/WD40 repeat-like superfamily protein;(source:Araport11)
AT1G11190	-1.72552	4.45112e-05	BFN1	bifunctional nuclease i;(source:Araport11)
AT1G11240	0.552375	0.019929	AT1G11240	ribosomal RNA-processing protein;(source:Araport11)
AT1G11260	-0.734581	0.00323757	STP1	sugar transporter 1;(source:Araport11)
AT1G11300	1.10287	4.1551e-05	AT1G11300	G-type lectin S-receptor-like Serine/Threonine-kinase;(source:Araport11)
AT1G11330	0.581828	0.00301627	AT1G11330	S-locus lectin protein kinase family protein;(source:Araport11)
AT1G11360	-0.498204	0.0201605	AT1G11360	Adenine nucleotide alpha hydrolases-like superfamily protein;(source:Araport11)
AT1G11545	-0.494183	0.0388173	XTH8	xyloglucan endotransglucosylase/hydrolase 8;(source:Araport11)
AT1G11580	0.770368	0.00797367	PMEPCRA	methylesterase PCR A;(source:Araport11)
AT1G11610	2.59671	6.45443e-09	CYP71A18	cytochrome P450, family 71, subfamily A, polypeptide 18;(source:Araport11)
AT1G11860	-0.303088	0.0192474	AT1G11860	Glycine cleavage T-protein family;(source:Araport11)
AT1G11910	-0.537959	0.00254103	APA1	aspartic proteinase A1;(source:Araport11)
AT1G12000	-0.520944	0.00178621	AT1G12000	Phosphofructokinase family protein;(source:Araport11)
AT1G12050	-0.40119	0.028787	AT1G12050	fumarylacetoacetase;(source:Araport11)
AT1G12080	-0.96603	0.00440024	AT1G12080	Vacuolar calcium-binding protein-like protein;(source:Araport11)
AT1G12090	-0.539206	0.000634647	ELP	extensin-like protein;(source:Araport11)
AT1G12110	-1.22747	6.53332e-05	NRT1.1	nitrate transporter 1.1;(source:Araport11)
AT1G12140	-1.09504	7.55619e-10	FMO GS-OX5	flavin-monooxygenase glucosinolate S-oxygenase 5;(source:Araport11)
AT1G12150	-1.29136	0.00121408	AT1G12150	weak chloroplast movement under blue light protein (DUF827);(source:Araport11)
AT1G12230	-0.513383	0.00530117	AT1G12230	Aldolase superfamily protein;(source:Araport11)
AT1G12240	-0.52962	0.00727492	ATBETAFRUCT4	Glycosyl hydrolases family 32 protein;(source:Araport11)
AT1G12320	0.772939	0.0452207	AT1G12320	ankyrin repeat/KH domain protein (DUF1442);(source:Araport11)
AT1G12470	-0.527318	0.00744606	AT1G12470	zinc ion binding protein;(source:Araport11)
AT1G12790	0.539177	0.0363693	AT1G12790	DNA ligase-like protein;(source:Araport11)
AT1G12805	1.90828	3.8586e-11	AT1G12805	nucleotide binding protein;(source:Araport11)
AT1G12840	-0.340737	0.00831061	DET3	vacuolar ATP synthase subunit C (VATC) / V-ATPase C subunit / vacuolar proton pump C subunit (DET3);(source:Araport11)
AT1G12940	2.24313	3.76345e-07	NRT2.5	nitrate transporter2.5;(source:Araport11)
AT1G12950	-0.844054	0.00501118	RSH2	root hair specific 2;(source:Araport11)
AT1G13050	0.694093	0.0187536	AT1G13050	proline-rich receptor-like kinase;(source:Araport11)
AT1G13080	-0.696527	0.000129797	CYP71B2	cytochrome P450, family 71, subfamily B, polypeptide 2;(source:Araport11)
AT1G13210	0.471368	0.00692174	ACA.l	autoinhibited Ca2+/ATPase II;(source:Araport11)
AT1G13380	0.386686	0.0264737	AT1G13380	sodium/hydrogen exchanger (DUF1218);(source:Araport11)
AT1G13420	-1.16269	0.0362239	ST4B	sulfotransferase 4B;(source:Araport11)
AT1G13430	-1.04232	0.000137412	ST4C	sulfotransferase 4C;(source:Araport11)
AT1G13480	1.11162	0.00355453	AT1G13480	hypothetical protein (DUF1262);(source:Araport11)
AT1G13490	1.3187	0.00926693	AT1G13490	hypothetical protein (DUF1262);(source:Araport11)
AT1G13510	-0.931099	0.0198372	AT1G13510	hypothetical protein (DUF1262);(source:Araport11)
AT1G13520	2.00315	2.29215e-07	AT1G13520	hypothetical protein (DUF1262);(source:Araport11)
AT1G13590	0.725985	0.0405421	PSK1	phytosulfokine 1 precursor;(source:Araport11)
AT1G14040	0.95891	2.0765e-07	AT1G14040	EXS (ERD1/XPR1/SYG1) family protein;(source:Araport11)
AT1G14150	-0.517276	0.0249845	PnsL2	PsbQ-like 2;(source:Araport11)
AT1G14240	-1.23391	0.015952	AT1G14240	GDA1/CD39 nucleoside phosphatase family protein;(source:Araport11)
AT1G14260	2.08722	9.65869e-08	AT1G14260	RING/FYVE/PHD zinc finger superfamily protein;(source:Araport11)
AT1G14300	0.624899	0.0176698	AT1G14300	ARM repeat superfamily protein;(source:Araport11)
AT1G14340	-0.866864	0.04997	AT1G14340	RNA-binding (RRM/RBD/RNP motifs) family protein;(source:Araport11)
AT1G14360	0.455796	0.0161829	UTR3	UDP-galactose transporter 3;(source:Araport11)
AT1G14370	0.704483	0.0312587	APK2A	protein kinase 2A;(source:Araport11)
AT1G14380	-0.360949	0.0387277	IQD28	IQ-domain 28;(source:Araport11)
AT1G14540	2.57763	2.89459e-17	PER4	Peroxidase superfamily protein;(source:Araport11)
AT1G14550	4.79554	2.87971e-75	AT1G14550	Peroxidase superfamily protein;(source:Araport11)
AT1G14600	1.11891	0.000857927	AT1G14600	Homeodomain-like superfamily protein;(source:Araport11)
AT1G14640	1.40123	2.26497e-07	AT1G14640	SWAP (Suppressor-of-White-APricot)/surp domain-containing protein;(source:Araport11)
AT1G14700	-0.562929	0.0110782	PAP3	purple acid phosphatase 3;(source:Araport11)
AT1G14960	-2.25503	6.82936e-17	AT1G14960	Polyketide cyclase/dehydrase and lipid transport superfamily protein;(source:Araport11)
AT1G15125	1.41151	0.00414168	AT1G15125	S-adenosyl-L-methionine-dependent methyltransferases superfamily protein;(source:Araport11)
AT1G15170	0.590708	0.000203813	AT1G15170	MATE efflux family protein;(source:Araport11)
AT1G15190	1.21646	0.0200985	AT1G15190	Fasciclin-like arabinogalactan family protein;(source:Araport11)
AT1G15230	0.47285	0.00552124	AT1G15230	hypothetical protein;(source:Araport11)
AT1G15415	2.28506	1.21177e-06	AT1G15415	late embryogenesis abundant-like protein;(source:Araport11)
AT1G15500	0.705875	0.00717034	ATNTT2	TLC ATP/ADP transporter;(source:Araport11)
AT1G15520	2.23061	1.58779e-08	ABCG40	pleiotropic drug resistance 12;(source:Araport11)
AT1G15550	-0.653079	0.0196369	GA3OX1	gibberellin 3-oxidase 1;(source:Araport11)
AT1G15625	1.02665	0.0394406	AT1G15625	E3 ubiquitin-protein ligase;(source:Araport11)
AT1G15630	-1.28086	0.0157773	AT1G15630	transmembrane protein;(source:Araport11)
AT1G15640	-1.23571	0.0213412	AT1G15640	transmembrane protein;(source:Araport11)
AT1G15780	-0.538809	0.00355991	NRB4	mediator of RNA polymerase II transcription subunit 15a-like protein;(source:Araport11)
AT1G15825	1.18036	0.00125611	AT1G15825	hydroxyproline-rich glycoprotein family protein;(source:Araport11)
AT1G15930	0.683625	2.9914e-05	AT1G15930	Ribosomal protein L7Ae/L30e/S12e/Gadd45 family protein;(source:Araport11)
AT1G15980	-0.754187	0.00430551	PnsB1	NDH-dependent cyclic electron flow 1;(source:Araport11)
AT1G16090	0.870977	0.0249557	WAKL7	wall associated kinase-like 7;(source:Araport11)
AT1G16370	-0.682283	0.00413798	2006-10-01	organic cation/carnitine transporter 6;(source:Araport11)
AT1G16410	1.43811	0.00595043	CYP79F1	cytochrome p450 79f1;(source:Araport11)
AT1G16440	-0.925695	0.0134289	RSH3	root hair specific 3;(source:Araport11)
AT1G16520	0.491243	0.0136669	AT1G16520	interactor of constitutive active ROPs protein;(source:Araport11)
AT1G16700	-0.370571	0.0269839	AT1G16700	Alpha-helical ferredoxin;(source:Araport11)
AT1G16720	-0.608441	0.00381731	HCF173	high chlorophyll fluorescence phenotype 173;(source:Araport11)
AT1G16740	0.395536	0.0424062	AT1G16740	Ribosomal protein L20;(source:Araport11)
AT1G16860	-0.466231	0.00288235	AT1G16860	Ubiquitin-specific protease family C19-related protein;(source:Araport11)
AT1G16905	-1.26382	0.00428513	AT1G16905	Curculin-like (mannose-binding) lectin family protein;(source:Araport11)
AT1G17020	-1.3738	4.53447e-05	SRG1	senescence-related gene 1;(source:Araport11)
AT1G17030	-1.14938	0.024234	AT1G17030	hypothetical protein;(source:Araport11)
AT1G17050	-0.742781	0.0103446	SPS2	solanesyl diphosphate synthase 2;(source:Araport11)
AT1G17060	-0.816743	0.00919205	CYP72C1	cytochrome p450 72c1;(source:Araport11)
AT1G17147	1.23466	0.000388054	AT1G17147	VQ motif-containing protein;(source:Araport11)
AT1G17170	-0.614343	0.0124852	GSTU24	glutathione S-transferase TAU 24;(source:Araport11)
AT1G17180	-0.719176	0.0172759	GSTU25	glutathione S-transferase TAU 25;(source:Araport11)
AT1G17190	-0.74797	0.0465177	GSTU26	glutathione S-transferase tau 26;(source:Araport11)
AT1G17200	0.412575	0.0150572	AT1G17200	Uncharacterized protein family (UPF0497);(source:Araport11)
AT1G17250	1.31842	0.0107684	RLP3	receptor like protein 3;(source:Araport11)
AT1G17290	0.640925	0.00072014	AlaAT1	alanine aminotransferas;(source:Araport11)
AT1G17330	0.644313	0.00229963	AT1G17330	Metal-dependent phosphohydrolase;(source:Araport11)
AT1G17340	-0.552588	0.0339555	AT1G17340	Phosphoinositide phosphatase family protein;(source:Araport11)
AT1G17360	-0.750359	0.00114009	AT1G17360	LOW protein: protein phosphatase 1 regulatory subunit-like protein;(source:Araport11)
AT1G17380	1.23215	0.0176638	JAZ5	jasmonate-zim-domain protein 5;(source:Araport11)
AT1G17450	-0.429193	0.0475346	AT1G17450	B-block binding subunit of TFIIIC;(source:Araport11)
AT1G17620	-0.798072	2.64548e-08	AT1G17620	Late embryogenesis abundant (LEA) hydroxyproline-rich glycoprotein family;(source:Araport11)
AT1G17745	-0.878408	3.69403e-05	PGDH	D-3-phosphoglycerate dehydrogenase;(source:Araport11)
AT1G17830	1.06949	0.00294558	AT1G17830	hypothetical protein (DUF789);(source:Araport11)
AT1G17880	0.417723	0.0269839	BTF3	basic transcription factor 3;(source:Araport11)
AT1G17940	-0.422539	0.04159	AT1G17940	Endosomal targeting BRO1-like domain-containing protein;(source:Araport11)
AT1G18100	-1.04495	0.0267484	E12A11	PEBP (phosphatidylethanolamine-binding protein) family protein;(source:Araport11)
AT1G18150	-0.653393	0.0159543	ATMPK8	Protein kinase superfamily protein;(source:Araport11)
AT1G18210	0.511516	0.00129106	AT1G18210	Calcium-binding EF-hand family protein;(source:Araport11)
AT1G18250	0.527798	0.00101022	ATLP-1	Pathogenesis-related thaumatin superfamily protein;(source:Araport11)
AT1G18270	-0.7719	7.62682e-05	AT1G18270	ketose-bisphosphate aldolase class-II family protein;(source:Araport11)
AT1G18390	0.894849	0.0281958	AT1G18390	Serine/Threonine kinase family catalytic domain protein;(source:Araport11)
AT1G18460	-0.443983	0.0383225	AT1G18460	alpha/beta-Hydrolases superfamily protein;(source:Araport11)
AT1G18570	2.42427	1.28003e-43	MYB51	myb domain protein 51;(source:Araport11)
AT1G18590	0.897536	1.11628e-06	SOT17	sulfotransferase 17;(source:Araport11)
AT1G18700	0.38183	0.0223681	AT1G18700	DNAJ heat shock N-terminal domain-containing protein;(source:Araport11)
AT1G18740	-0.794479	3.50039e-05	AT1G18740	ROH1, putative (DUF793);(source:Araport11)
AT1G18870	-0.768254	0.0224269	ICS2	isochorismate synthase 2;(source:Araport11)
AT1G18880	-1.19909	0.000235092	NRT1.9	Major facilitator superfamily protein;(source:Araport11)
AT1G18940	-1.03799	0.0467343	AT1G18940	Nodulin-like / Major Facilitator Superfamily protein;(source:Araport11)
AT1G19110	-0.610084	0.000334893	AT1G19110	inter-alpha-trypsin inhibitor heavy chain-like protein;(source:Araport11)
AT1G19130	0.656026	0.000298872	AT1G19130	RmlC-like jelly roll fold protein;(source:Araport11)
AT1G19150	-0.360097	0.0472051	Lhca6	PSI type II chlorophyll a/b-binding protein (Lhca2*1);(source:Araport11)
AT1G19180	0.745605	0.000424351	JAZ1	jasmonate-zim-domain protein 1;(source:Araport11)
AT1G19380	0.811188	0.011304	AT1G19380	sugar, putative (DUF1195);(source:Araport11)
AT1G19440	-0.737498	0.000267479	KCS4	3-ketoacyl-CoA synthase 4;(source:Araport11)
AT1G19530	2.01681	3.54141e-12	AT1G19530	DNA polymerase epsilon catalytic subunit A;(source:Araport11)
AT1G19600	0.491336	0.0016331	AT1G19600	pfkB-like carbohydrate kinase family protein;(source:Araport11)
AT1G19610	1.78146	5.82308e-09	PDF1.4	defensin-like protein;(source:Araport11)
AT1G19680	0.500521	0.00411682	AT1G19680	RING/U-box superfamily protein;(source:Araport11)
AT1G19835	-0.510238	0.000733259	AT1G19835	filament-like protein (DUF869);(source:Araport11)
AT1G19900	-3.29731	1.67746e-33	AT1G19900	glyoxal oxidase-related protein;(source:Araport11)
AT1G19960	-2.03906	1.7104e-05	AT1G19960	transcription factor;(source:Araport11)
AT1G20020	-0.67146	0.00242077	FNR2	ferredoxin-NADP[+]-oxidoreductase 2;(source:Araport11)
AT1G20030	-0.554389	0.0133339	AT1G20030	Pathogenesis-related thaumatin superfamily protein;(source:Araport11)
AT1G20100	0.568517	0.000295026	AT1G20100	DNA ligase-like protein;(source:Araport11)
AT1G20110	-0.483229	0.000615071	AT1G20110	RING/FYVE/PHD zinc finger superfamily protein;(source:Araport11)
AT1G20160	-1.72099	2.05201e-07	ATSBT5.2	Subtilisin-like serine endopeptidase family protein;(source:Araport11)
AT1G20260	-0.669582	3.4259e-05	VAB3	ATPase, V1 complex, subunit B protein;(source:Araport11)
AT1G20290	1.04896	0.0419637	AT1G20290	SWI-SNF-related chromatin binding protein;(source:Araport11)
AT1G20330	-0.509844	0.0279315	SMT2	sterol methyltransferase 2;(source:Araport11)
AT1G20340	-0.562548	0.00340108	DRT112	Cupredoxin superfamily protein;(source:Araport11)
AT1G20440	-1.50273	2.48128e-12	COR47	cold-regulated 47;(source:Araport11)
AT1G20450	-1.10179	1.31344e-17	ERD10	Dehydrin family protein;(source:Araport11)
AT1G20560	-0.51953	0.00486637	AAE1	acyl activating enzyme 1;(source:Araport11)
AT1G20610	-0.54651	0.0118525	CYCB2;3	Cyclin B2;(source:Araport11)
AT1G20735	1.22175	0.0133243	AT1G20735	F-box and associated interaction domains-containing protein;(source:Araport11)
AT1G20850	-0.634681	0.0413592	XCP2	xylem cysteine peptidase 2;(source:Araport11)
AT1G20900	0.597438	5.96539e-05	ESC	Putative AT-hook DNA-binding family protein;(source:Araport11)
AT1G20980	-0.470711	0.0137931	SPL14	squamosa promoter binding protein-like 14;(source:Araport11)
AT1G21090	0.545734	0.0461562	AT1G21090	Cupredoxin superfamily protein;(source:Araport11)
AT1G21100	4.88013	4.70938e-135	IGMT1	O-methyltransferase family protein;(source:Araport11)
AT1G21110	2.77938	3.58991e-51	IGMT3	O-methyltransferase family protein;(source:Araport11)
AT1G21120	4.85755	1.23672e-113	IGMT2	O-methyltransferase family protein;(source:Araport11)
AT1G21130	1.02935	3.58494e-05	IGMT4	O-methyltransferase family protein;(source:Araport11)
AT1G21320	2.28321	2.34025e-08	AT1G21320	nucleic acid/nucleotide binding protein;(source:Araport11)
AT1G21326	1.4952	0.00135182	AT1G21326	VQ motif-containing protein;(source:Araport11)
AT1G21540	-0.746345	0.026695	AT1G21540	AMP-dependent synthetase and ligase family protein;(source:Araport11)
AT1G21590	0.50543	0.0461617	AT1G21590	kinase with adenine nucleotide alpha hydrolases-like domain-containing protein;(source:Araport11)
AT1G21640	-0.374155	0.0257731	NADK2	NAD kinase 2;(source:Araport11)
AT1G21660	-0.292063	0.0418272	AT1G21660	Chaperone DnaJ-domain superfamily protein;(source:Araport11)
AT1G21670	-0.862472	3.02793e-07	AT1G21670	DPP6 amino-terminal domain protein;(source:Araport11)
AT1G21680	-0.768694	0.0415247	AT1G21680	DPP6 N-terminal domain-like protein;(source:Araport11)
AT1G21930	0.543755	0.022912	AT1G21930	transmembrane protein;(source:Araport11)
AT1G22060	-0.506266	0.0210458	AT1G22060	sporulation-specific protein;(source:Araport11)
AT1G22170	-0.715289	0.0121914	AT1G22170	Phosphoglycerate mutase family protein;(source:Araport11)
AT1G22440	-0.98971	2.11246e-07	AT1G22440	Zinc-binding alcohol dehydrogenase family protein;(source:Araport11)
AT1G22470	-1.19784	0.00091417	AT1G22470	hypothetical protein;(source:Araport11)
AT1G22500	-1.29507	0.000975395	ATL15	RING/U-box superfamily protein;(source:Araport11)
AT1G22530	-0.655653	0.00290963	PATL2	PATELLIN 2;(source:Araport11)
AT1G22550	-0.427246	0.0230775	AT1G22550	Major facilitator superfamily protein;(source:Araport11)
AT1G22740	-0.911702	0.00922046	RABG3B	RAB GTPase homolog G3B;(source:Araport11)
AT1G22770	-0.432943	0.00618461	GI	gigantea protein (GI);(source:Araport11)
AT1G22882	-0.514233	0.00592663	AT1G22882	Galactose-binding protein;(source:Araport11)
AT1G22890	1.74228	0.000127952	AT1G22890	transmembrane protein;(source:Araport11)
AT1G22930	-0.472013	0.0203256	AT1G22930	T-complex protein 11;(source:Araport11)
AT1G23030	-0.562918	0.00146177	AT1G23030	ARM repeat superfamily protein;(source:Araport11)
AT1G23040	-0.788079	1.44326e-06	AT1G23040	hydroxyproline-rich glycoprotein family protein;(source:Araport11)
AT1G23080	-0.533796	8.01939e-06	PIN7	Auxin efflux carrier family protein;(source:Araport11)
AT1G23090	-0.4643	0.0183805	AST91	sulfate transporter 91;(source:Araport11)
AT1G23190	-0.543571	0.0172759	PGM3	Phosphoglucomutase/phosphomannomutase family protein;(source:Araport11)
AT1G23540	-1.20302	0.00813979	PERK12	Protein kinase superfamily protein;(source:Araport11)
AT1G23550	1.39026	3.15665e-05	SRO2	similar to RCD one 2;(source:Araport11)
AT1G23710	0.823656	0.000569356	AT1G23710	hypothetical protein (DUF1645);(source:Araport11)
AT1G23760	-1.70759	5.31809e-13	JP630	BURP domain-containing protein;(source:Araport11)
AT1G23800	-1.4394	7.50015e-08	ALDH2B7	aldehyde dehydrogenase 2B7;(source:Araport11)
AT1G23830	1.00715	0.00502668	AT1G23830	transmembrane protein;(source:Araport11)
AT1G23840	1.7476	0.000463999	AT1G23840	transmembrane protein;(source:Araport11)
AT1G23860	0.588941	0.0142364	RSZ21	RS-containing zinc finger protein 21;(source:Araport11)
AT1G23870	-0.385029	0.043513	TPS9	trehalose-phosphatase/synthase 9;(source:Araport11)
AT1G24100	0.399177	0.0171008	UGT74B1	UDP-glucosyl transferase 74B1;(source:Araport11)
AT1G24140	1.55342	0.00108006	AT1G24140	Matrixin family protein;(source:Araport11)
AT1G24145	1.49288	0.00396704	AT1G24145	transmembrane protein;(source:Araport11)
AT1G24190	-0.400164	0.0136662	SNL3	SIN3-like 3;(source:Araport11)
AT1G24280	-0.808479	0.00066115	G6PD3	glucose-6-phosphate dehydrogenase 3;(source:Araport11)
AT1G24320	-1.61649	0.000238864	AT1G24320	Six-hairpin glycosidases superfamily protein;(source:Araport11)
AT1G24880	0.691493	0.0419455	LpxC2
AT1G25180	0.759767	2.47111e-05	AT1G25180	hypothetical protein;(source:Araport11)
AT1G25220	2.09378	2.17908e-35	ASB1	anthranilate synthase beta subunit 1;(source:Araport11)
AT1G25260	0.670285	9.91529e-07	AT1G25260	Ribosomal protein L10 family protein;(source:Araport11)
AT1G25270	1.3246	0.00793266	UMAMIT24	nodulin MtN21 /EamA-like transporter family protein;(source:Araport11)
AT1G25275	0.891077	0.0150548	AT1G25275	thionin-like protein;(source:Araport11)
AT1G26240	3.81634	1.74667e-18	AT1G26240	Proline-rich extensin-like family protein;(source:Araport11)
AT1G26250	4.41531	1.01796e-44	AT1G26250	Proline-rich extensin-like family protein;(source:Araport11)
AT1G26260	0.977525	0.000424933	CIB5	cryptochrome-interacting basic-helix-loop-helix 5;(source:Araport11)
AT1G26270	0.868271	1.03798e-10	AT1G26270	Phosphatidylinositol 3- and 4-kinase family protein;(source:Araport11)
AT1G26360	-0.958558	0.0383225	MES13	methyl esterase 13;(source:Araport11)
AT1G26380	7.32984	2.97256e-156	AT1G26380	FAD-binding Berberine family protein;(source:Araport11)
AT1G26390	4.55719	2.33291e-37	AT1G26390	FAD-binding Berberine family protein;(source:Araport11)
AT1G26410	5.89416	7.3053e-80	AT1G26410	FAD-binding Berberine family protein;(source:Araport11)
AT1G26420	4.77748	5.57891e-75	AT1G26420	FAD-binding Berberine family protein;(source:Araport11)
AT1G26770	0.938615	2.87146e-05	EXPA10	expansin A10;(source:Araport11)
AT1G26820	-2.06216	2.57314e-06	RNS3	ribonuclease 3;(source:Araport11)
AT1G27000	-0.480622	0.00546111	AT1G27000	GRIP/coiled-coil protein, putative (DUF1664);(source:Araport11)
AT1G27030	-0.805348	0.000615071	AT1G27030	hypothetical protein;(source:Araport11)
AT1G27140	-1.16247	4.06712e-06	GSTU14	glutathione S-transferase tau 14;(source:Araport11)
AT1G27170	-0.853415	0.00348545	AT1G27170	transmembrane receptors / ATP binding protein;(source:Araport11)
AT1G27200	-0.556559	0.0215059	AT1G27200	glycosyltransferase family protein (DUF23);(source:Araport11)
AT1G27300	0.464811	0.00257626	AT1G27300	transmembrane protein;(source:Araport11)
AT1G27320	-0.529857	0.000203813	HK3	histidine kinase 3;(source:Araport11)
AT1G27435	0.429142	0.0414842	AT1G27435	hypothetical protein;(source:Araport11)
AT1G27480	-0.372479	0.0289636	AT1G27480	alpha/beta-Hydrolases superfamily protein;(source:Araport11)
AT1G27720	0.84975	0.0473671	TAF4B	TBP-associated factor 4B;(source:Araport11)
AT1G27730	1.57015	5.27226e-05	STZ	salt tolerance zinc finger;(source:Araport11)
AT1G27740	-0.722276	0.0324195	RSL4	root hair defective 6-like 4;(source:Araport11)
AT1G27850	-0.397496	0.041093	AT1G27850	RUN/FYVE domain protein;(source:Araport11)
AT1G28130	-0.719071	0.00144767	GH3.17	Auxin-responsive GH3 family protein;(source:Araport11)
AT1G28170	-0.762069	0.0450966	SOT7	sulfotransferase 7;(source:Araport11)
AT1G28190	2.0583	1.41046e-16	AT1G28190	hypothetical protein;(source:Araport11)
AT1G28360	0.755938	0.0116538	ERF12	ERF domain protein 12;(source:Araport11)
AT1G28390	0.664051	0.0106601	AT1G28390	Protein kinase superfamily protein;(source:Araport11)
AT1G28440	-0.535708	0.0171406	HSL1	HAESA-like 1;(source:Araport11)
AT1G28480	-1.01922	0.0238499	GRX480	Thioredoxin superfamily protein;(source:Araport11)
AT1G28760	0.677008	0.0357215	AT1G28760	guanosine-3,5-bis (diphosphate) 3-pyrophosphohydrolase, putative (DUF2215);(source:Araport11)
AT1G29020	-1.94835	4.44385e-06	AT1G29020	Calcium-binding EF-hand family protein;(source:Araport11)
AT1G29025	-1.03746	0.000153658	AT1G29025	Calcium-binding EF-hand family protein;(source:Araport11)
AT1G29050	-0.912046	0.000567664	TBL38	TRICHOME BIREFRINGENCE-LIKE 38;(source:Araport11)
AT1G29120	0.563425	0.00435592	AT1G29120	Hydrolase-like protein family;(source:Araport11)
AT1G29150	-0.48144	0.040913	ATS9	non-ATPase subunit 9;(source:Araport11)
AT1G29240	0.540268	0.0276001	AT1G29240	transcription initiation factor TFIID subunit, putative (DUF688);(source:Araport11)
AT1G29600	1.37089	0.00838521	AT1G29600	Zinc finger C-x8-C-x5-C-x3-H type family protein;(source:Araport11)
AT1G29660	-0.671071	0.0345526	AT1G29660	GDSL-like Lipase/Acylhydrolase superfamily protein;(source:Araport11)
AT1G29860	1.35745	0.0104621	WRKY71	WRKY DNA-binding protein 71;(source:Araport11)
AT1G29910	-0.419509	0.0131153	CAB3	chlorophyll A/B binding protein 3;(source:Araport11)
AT1G29930	-0.475936	0.0069408	CAB1	chlorophyll A/B binding protein 1;(source:Araport11)
AT1G30120	-0.432464	0.00567366	PDH-E1 BETA	pyruvate dehydrogenase E1 beta;(source:Araport11)
AT1G30135	1.11079	0.038725	JAZ8	jasmonate-zim-domain protein 8;(source:Araport11)
AT1G30230	0.507108	0.000461359	eEF-1Bb1	translation elongation factor EF1B/ribosomal protein S6 family protein;(source:Araport11)
AT1G30360	-0.753229	3.19604e-09	ERD4	Early-responsive to dehydration stress protein (ERD4);(source:Araport11)
AT1G30370	1.9628	9.32559e-08	DLAH	alpha/beta-Hydrolases superfamily protein;(source:Araport11)
AT1G30400	-0.597245	1.57542e-07	ABCC1	multidrug resistance-associated protein 1;(source:Araport11)
AT1G30410	-0.43343	0.0380254	ABCC12	multidrug resistance-associated protein 13;(source:Araport11)
AT1G30420	1.32345	1.57184e-12	ABCC11	multidrug resistance-associated protein 12;(source:Araport11)
AT1G30440	-0.674394	2.83803e-05	AT1G30440	Phototropic-responsive NPH3 family protein;(source:Araport11)
AT1G30510	-1.57316	1.26207e-12	RFNR2	root FNR 2;(source:Araport11)
AT1G30570	-0.377067	0.0247644	HERK2	hercules receptor kinase 2;(source:Araport11)
AT1G30650	-0.708658	0.00959967	WRKY14	WRKY DNA-binding protein 14;(source:Araport11)
AT1G30690	-0.958316	0.000250244	AT1G30690	Sec14p-like phosphatidylinositol transfer family protein;(source:Araport11)
AT1G30720	1.39274	1.78658e-05	AT1G30720	FAD-binding Berberine family protein;(source:Araport11)
AT1G30730	2.30714	3.01922e-39	AT1G30730	FAD-binding Berberine family protein;(source:Araport11)
AT1G30740	1.11523	0.0315291	AT1G30740	FAD-binding Berberine family protein;(source:Araport11)
AT1G30750	-1.03167	1.44595e-05	AT1G30750	TPRXL;(source:Araport11)
AT1G30755	1.76457	1.50545e-07	AT1G30755	elongation factor G, putative (DUF668);(source:Araport11)
AT1G30870	-1.21112	0.000801462	AT1G30870	Peroxidase superfamily protein;(source:Araport11)
AT1G30880	0.585845	8.54138e-06	AT1G30880	hypothetical protein;(source:Araport11)
AT1G30890	-0.449431	0.0351041	AT1G30890	Integral membrane HRF1 family protein;(source:Araport11)
AT1G30900	-0.93466	0.00129726	VSR6	VACUOLAR SORTING RECEPTOR 6;(source:Araport11)
AT1G31280	-0.66615	0.00266161	AGO2	Argonaute family protein;(source:Araport11)
AT1G31320	1.08971	5.79468e-05	LBD4	LOB domain-containing protein 4;(source:Araport11)
AT1G31330	-0.617705	0.00377721	PSAF	photosystem I subunit F;(source:Araport11)
AT1G31600	0.419348	0.0388173	TRM9	RNA-binding (RRM/RBD/RNP motifs) family protein;(source:Araport11)
AT1G31710	-0.980283	0.000250348	AT1G31710	Copper amine oxidase family protein;(source:Araport11)
AT1G31770	-1.08507	3.02169e-07	ABCG14	ATP-binding cassette 14;(source:Araport11)
AT1G31800	-0.404217	0.0196121	CYP97A3	cytochrome P450, family 97, subfamily A, polypeptide 3;(source:Araport11)
AT1G31930	0.410788	0.00546248	XLG3	extra-large GTP-binding protein 3;(source:Araport11)
AT1G32060	-0.3699	0.00202885	PRK	phosphoribulokinase;(source:Araport11)
AT1G32080	-0.635053	7.22898e-05	LrgB	membrane protein;(source:Araport11)
AT1G32100	-1.17172	6.30934e-05	PRR1	pinoresinol reductase 1;(source:Araport11)
AT1G32170	-0.906724	0.000291215	XTH30	xyloglucan endotransglucosylase/hydrolase 30;(source:Araport11)
AT1G32210	0.471341	0.0217551	ATDAD1	Defender against death (DAD family) protein;(source:Araport11)
AT1G32220	-0.483438	0.0416482	AT1G32220	NAD(P)-binding Rossmann-fold superfamily protein;(source:Araport11)
AT1G32350	2.31601	9.08994e-07	AOX1D	alternative oxidase 1D;(source:Araport11)
AT1G32440	-0.452662	0.0301791	PKp3	plastidial pyruvate kinase 3;(source:Araport11)
AT1G32960	1.35744	0.0103938	SBT3.3	Subtilase family protein;(source:Araport11)
AT1G33030	2.14048	2.39825e-06	AT1G33030	O-methyltransferase family protein;(source:Araport11)
AT1G33055	1.87653	2.06145e-08	AT1G33055	hypothetical protein;(source:Araport11)
AT1G33090	-1.06682	0.0183624	AT1G33090	MATE efflux family protein;(source:Araport11)
AT1G33110	0.865686	5.72239e-07	AT1G33110	MATE efflux family protein;(source:Araport11)
AT1G33120	0.448947	0.0204242	AT1G33120	Ribosomal protein L6 family;(source:Araport11)
AT1G33265	0.505496	0.0368594	AT1G33265	Transmembrane proteins 14C;(source:Araport11)
AT1G33440	-0.804106	0.0141773	AT1G33440	Major facilitator superfamily protein;(source:Araport11)
AT1G33470	-0.520498	0.000275497	AT1G33470	RNA-binding (RRM/RBD/RNP motifs) family protein;(source:Araport11)
AT1G33590	1.16013	3.63293e-22	AT1G33590	Leucine-rich repeat (LRR) family protein;(source:Araport11)
AT1G33600	0.986165	1.74079e-12	AT1G33600	Leucine-rich repeat (LRR) family protein;(source:Araport11)
AT1G33610	0.523185	0.00983262	AT1G33610	Leucine-rich repeat (LRR) family protein;(source:Araport11)
AT1G33790	0.94784	0.000190537	AT1G33790	jacalin lectin family protein;(source:Araport11)
AT1G33800	-1.00723	9.51851e-08	GXMT1	glucuronoxylan 4-O-methyltransferase-like protein (DUF579);(source:Araport11)
AT1G33970	-0.600947	0.017347	AT1G33970	P-loop containing nucleoside triphosphate hydrolases superfamily protein;(source:Araport11)
AT1G34040	-1.08154	0.00427619	AT1G34040	Pyridoxal phosphate (PLP)-dependent transferases superfamily protein;(source:Araport11)
AT1G34150	0.553425	0.0419284	AT1G34150	Pseudouridine synthase family protein;(source:Araport11)
AT1G34200	0.376822	0.0276158	AT1G34200	Glyceraldehyde-3-phosphate dehydrogenase-like family protein;(source:Araport11)
AT1G34350	0.56903	0.00915852	AT1G34350	Tmem18;(source:Araport11)
AT1G34360	0.385921	0.0484383	AT1G34360	translation initiation factor 3 (IF-3) family protein;(source:Araport11)
AT1G34430	-0.596136	4.68944e-05	EMB3003	2-oxoacid dehydrogenases acyltransferase family protein;(source:Araport11)
AT1G34510	-0.94488	0.0256675	AT1G34510	Peroxidase superfamily protein;(source:Araport11)
AT1G34540	-1.04624	0.0438504	CYP94D1	cytochrome P450, family 94, subfamily D, polypeptide 1;(source:Araport11)
AT1G35210	1.90869	7.20276e-05	AT1G35210	hypothetical protein;(source:Araport11)
AT1G35230	2.63687	1.06942e-10	AGP5	arabinogalactan protein 5;(source:Araport11)
AT1G35330	-1.28932	0.00742997	AT1G35330	RING/U-box superfamily protein;(source:Araport11)
AT1G35500	1.11108	0.0442307	AT1G35500	hypothetical protein;(source:Araport11)
AT1G35720	-1.1656	1.56655e-12	ANNAT1	annexin 1;(source:Araport11)
AT1G36070	0.564284	0.028133	AT1G36070	Transducin/WD40 repeat-like superfamily protein;(source:Araport11)
AT1G36370	-0.893373	3.23876e-06	SHM7	serine hydroxymethyltransferase 7;(source:Araport11)
AT1G36622	2.19871	3.88476e-10	AT1G36622	transmembrane protein;(source:Araport11)
AT1G36640	1.92705	3.75512e-05	AT1G36640	transmembrane protein;(source:Araport11)
AT1G36730	-0.53956	0.000501914	AT1G36730	Translation initiation factor IF2/IF5;(source:Araport11)
AT1G38131	-1.32716	0.00294558	AT1G38131	O-fucosyltransferase family protein;(source:Araport11)
AT1G42970	-0.591222	0.00057808	GAPB	glyceraldehyde-3-phosphate dehydrogenase B subunit;(source:Araport11)
AT1G42990	0.930049	4.60068e-12	BZIP60	basic region/leucine zipper motif 60;(source:Araport11)
AT1G44020	-1.10971	0.0460245	AT1G44020	Cysteine/Histidine-rich C1 domain family protein;(source:Araport11)
AT1G44050	-1.09671	0.0172465	AT1G44050	Cysteine/Histidine-rich C1 domain family protein;(source:Araport11)
AT1G44160	-0.800598	0.0335791	AT1G44160	HSP40/DnaJ peptide-binding protein;(source:Araport11)
AT1G44170	-0.512009	0.00428098	ALDH3H1	aldehyde dehydrogenase 3H1;(source:Araport11)
AT1G44446	-0.26503	0.0477873	CH1	Pheophorbide a oxygenase family protein with Rieske 2Fe-2S domain-containing protein;(source:Araport11)
AT1G44575	-0.54157	0.00344669	NPQ4	Chlorophyll A-B binding family protein;(source:Araport11)
AT1G44608	-0.498508	0.0475777	AT1G44608	hypothetical protein;(source:Araport11)
AT1G44800	-1.45537	4.06536e-13	SIAR1	nodulin MtN21 /EamA-like transporter family protein;(source:Araport11)
AT1G44820	-0.374204	0.0316391	AT1G44820	Peptidase M20/M25/M40 family protein;(source:Araport11)
AT1G44830	0.750954	0.00375744	AT1G44830	Integrase-type DNA-binding superfamily protein;(source:Araport11)
AT1G44970	-0.768952	0.00013339	AT1G44970	Peroxidase superfamily protein;(source:Araport11)
AT1G45050	0.57511	0.0191328	ATUBC2-1	Ubiquitin-conjugating enzyme family protein;(source:Araport11)
AT1G45201	-0.537486	0.0491457	TLL1	triacylglycerol lipase-like 1;(source:Araport11)
AT1G45616	-1.83625	0.000174162	RLP6	receptor like protein 6;(source:Araport11)
AT1G45688	-0.378279	0.0141024	AT1G45688	transmembrane protein;(source:Araport11)
AT1G46264	0.524554	0.0110202	HSFB4	heat shock transcription factor B4;(source:Araport11)
AT1G47128	-0.774421	2.24107e-06	RD21A	Granulin repeat cysteine protease family protein;(source:Araport11)
AT1G47130	1.9889	1.79258e-05	AT1G47130	hypothetical protein;(source:Araport11)
AT1G47210	0.565275	0.0220226	CYCA3;2	cyclin-dependent protein kinase 3;(source:Araport11)
AT1G47270	0.460123	0.0176968	TLP6	tubby like protein 6;(source:Araport11)
AT1G47480	-0.700406	0.000557383	AT1G47480	alpha/beta-Hydrolases superfamily protein;(source:Araport11)
AT1G47497	1.00295	0.0491534	AT1G47497	Polynucleotidyl transferase, ribonuclease H-like superfamily protein;(source:Araport11)
AT1G47550	-0.421781	0.0273772	SEC3A	exocyst complex component sec3A;(source:Araport11)
AT1G47570	0.424777	0.0333763	AT1G47570	RING/U-box superfamily protein;(source:Araport11)
AT1G47600	-2.2483	6.38158e-08	BGLU34	beta glucosidase 34;(source:Araport11)
AT1G47670	-0.569833	0.0326929	AT1G47670	Transmembrane amino acid transporter family protein;(source:Araport11)
AT1G47840	0.42827	0.0138609	HXK3	hexokinase 3;(source:Araport11)
AT1G47890	1.89186	4.16882e-05	RLP7	receptor like protein 7;(source:Araport11)
AT1G47990	1.54483	0.00192716	GA2OX4	gibberellin 2-oxidase 4;(source:Araport11)
AT1G48030	-0.48211	0.00121063	mtLPD1	mitochondrial lipoamide dehydrogenase 1;(source:Araport11)
AT1G48120	-0.630985	0.0077309	AT1G48120	serine/threonine-protein phosphatase 7 long form-like protein;(source:Araport11)
AT1G48480	-0.732711	2.23712e-06	RKL1	receptor-like kinase 1;(source:Araport11)
AT1G48550	0.677303	0.0140028	AT1G48550	Vacuolar protein sorting-associated protein 26;(source:Araport11)
AT1G48600	-1.57376	3.68273e-13	PMEAMT	S-adenosyl-L-methionine-dependent methyltransferases superfamily protein;(source:Araport11)
AT1G48745	-1.21214	0.00835593	AT1G48745	hypothetical protein;(source:Araport11)
AT1G48750	-1.53173	2.10695e-07	AT1G48750	Bifunctional inhibitor/lipid-transfer protein/seed storage 2S albumin superfamily protein;(source:Araport11)
AT1G48930	-1.16573	0.000577233	GH9C1	glycosyl hydrolase 9C1;(source:Araport11)
AT1G49000	2.00111	1.70094e-05	AT1G49000	transmembrane protein;(source:Araport11)
AT1G49160	-1.03609	0.0357058	WNK7	Protein kinase superfamily protein;(source:Araport11)
AT1G49340	-0.589085	0.0211212	ATPI4K ALPHA	Phosphatidylinositol 3- and 4-kinase family protein;(source:Araport11)
AT1G49410	0.367998	0.0171485	TOM6	translocase of the outer mitochondrial membrane 6;(source:Araport11)
AT1G49450	-1.87242	1.31749e-05	AT1G49450	Transducin/WD40 repeat-like superfamily protein;(source:Araport11)
AT1G49470	-1.29927	1.02591e-06	AT1G49470	transmembrane epididymal protein (DUF716);(source:Araport11)
AT1G49500	-1.65912	1.38007e-05	AT1G49500	transcription initiation factor TFIID subunit 1b-like protein;(source:Araport11)
AT1G49660	-0.667032	0.00469237	CXE5	carboxyesterase 5;(source:Araport11)
AT1G49960	-1.15047	0.0260732	AT1G49960	Xanthine/uracil permease family protein;(source:Araport11)
AT1G50030	-0.465175	0.026979	TOR	target of rapamycin;(source:Araport11)
AT1G50060	-0.936038	0.0262886	AT1G50060	CAP (Cysteine-rich secretory proteins, Antigen 5, and Pathogenesis-related 1 protein) superfamily protein;(source:Araport11)
AT1G50090	-1.45593	0.00442247	BCAT7	D-aminoacid aminotransferase-like PLP-dependent enzymes superfamily protein;(source:Araport11)
AT1G50250	-0.733275	0.000111847	FTSH1	FTSH protease 1;(source:Araport11)
AT1G50560	-1.03393	0.00859114	CYP705A25	cytochrome P450, family 705, subfamily A, polypeptide 25;(source:Araport11)
AT1G50640	0.453703	0.0179533	ERF3	ethylene responsive element binding factor 3;(source:Araport11)
AT1G50740	0.802897	0.00537847	AT1G50740	Transmembrane proteins 14C;(source:Araport11)
AT1G50890	-0.936985	6.51901e-06	AT1G50890	ARM repeat superfamily protein;(source:Araport11)
AT1G51060	-0.382366	0.00267111	HTA10	histone H2A 10;(source:Araport11)
AT1G51130	0.64093	0.03553	AT1G51130	Nse4, component of Smc5/6 DNA repair complex;(source:Araport11)
AT1G51270	1.50738	0.00129439	AT1G51270	vesicle-associated protein 1-4;(source:Araport11)
AT1G51420	-1.06992	0.00529013	SPP1	sucrose-phosphatase 1;(source:Araport11)
AT1G51470	-2.63463	1.52817e-10	BGLU35	beta glucosidase 35;(source:Araport11)
AT1G51570	-0.250279	0.0419284	AT1G51570	Calcium-dependent lipid-binding (CaLB domain) plant phosphoribosyltransferase family protein;(source:Araport11)
AT1G51730	0.520668	0.000654653	AT1G51730	Ubiquitin-conjugating enzyme family protein;(source:Araport11)
AT1G51840	-1.49883	0.00212057	AT1G51840	kinase-like protein;(source:Araport11)
AT1G51850	-0.915533	0.00510674	AT1G51850	Leucine-rich repeat protein kinase family protein;(source:Araport11)
AT1G51860	-1.04049	0.0330938	AT1G51860	Leucine-rich repeat protein kinase family protein;(source:Araport11)
AT1G51890	1.05787	0.0353346	AT1G51890	Leucine-rich repeat protein kinase family protein;(source:Araport11)
AT1G51913	2.65299	6.15077e-09	AT1G51913	transmembrane protein;(source:Araport11)
AT1G51915	2.10902	1.03791e-05	AT1G51915	cryptdin protein-like protein;(source:Araport11)
AT1G51920	3.04227	5.71119e-12	AT1G51920	transmembrane protein;(source:Araport11)
AT1G52050	-1.26756	0.00160113	AT1G52050	Mannose-binding lectin superfamily protein;(source:Araport11)
AT1G52190	-0.881581	0.00891228	AT1G52190	Major facilitator superfamily protein;(source:Araport11)
AT1G52410	-1.09579	0.0157175	TSA1	TSK-associating protein 1;(source:Araport11)
AT1G52510	-0.412077	0.0414842	AT1G52510	alpha/beta-Hydrolases superfamily protein;(source:Araport11)
AT1G52540	-0.79155	0.000765724	AT1G52540	Protein kinase superfamily protein;(source:Araport11)
AT1G52660	-0.990938	0.0306358	AT1G52660	P-loop containing nucleoside triphosphate hydrolases superfamily protein;(source:Araport11)
AT1G52740	0.344636	0.0416783	HTA9	histone H2A protein 9;(source:Araport11)
AT1G52760	-0.687104	0.000354383	LysoPL2	lysophospholipase 2;(source:Araport11)
AT1G52780	-0.460684	0.0419637	AT1G52780	PII, uridylyltransferase (DUF2921);(source:Araport11)
AT1G53080	1.30547	0.00886232	AT1G53080	Legume lectin family protein;(source:Araport11)
AT1G53120	0.494318	0.0213412	AT1G53120	RNA-binding S4 domain-containing protein;(source:Araport11)
AT1G53163	-1.02602	0.0091317	AT1G53163	membrane-associated kinase regulator;(source:Araport11)
AT1G53210	-0.453618	0.0133243	AT1G53210	sodium/calcium exchanger family protein / calcium-binding EF hand family protein;(source:Araport11)
AT1G53310	-0.700158	8.1407e-07	PPC1	phosphoenolpyruvate carboxylase 1;(source:Araport11)
AT1G53320	0.34534	0.0119161	TLP7	tubby like protein 7;(source:Araport11)
AT1G53380	0.378926	0.0222811	AT1G53380	hypothetical protein (DUF641);(source:Araport11)
AT1G53430	0.575409	0.00103351	AT1G53430	Leucine-rich repeat transmembrane protein kinase;(source:Araport11)
AT1G53440	0.708057	0.00157485	AT1G53440	Leucine-rich repeat transmembrane protein kinase;(source:Araport11)
AT1G53480	0.91015	3.10711e-07	MRD1	mto 1 responding down 1;(source:Araport11)
AT1G53500	-0.361588	0.0270312	MUM4	NAD-dependent epimerase/dehydratase family protein;(source:Araport11)
AT1G53510	0.610031	0.0278699	MPK18	mitogen-activated protein kinase 18;(source:Araport11)
AT1G53580	-0.486655	0.00278911	GLY3	glyoxalase II 3;(source:Araport11)
AT1G53590	-0.40677	0.0300059	NTMC2T6.1	Calcium-dependent lipid-binding (CaLB domain) family protein;(source:Araport11)
AT1G53625	3.02855	1.07964e-16	AT1G53625	hypothetical protein;(source:Araport11)
AT1G53680	-1.41676	2.5569e-07	GSTU28	glutathione S-transferase TAU 28;(source:Araport11)
AT1G53730	-0.776248	1.077e-07	SRF6	STRUBBELIG-receptor family 6;(source:Araport11)
AT1G53760	0.467215	0.032149	AT1G53760	K+-H+ exchange-like protein;(source:Araport11)
AT1G53780	0.579332	0.0224269	AT1G53780	26S proteasome regulatory complex ATPase;(source:Araport11)
AT1G53830	-2.0542	2.75443e-48	PME2	pectin methylesterase 2;(source:Araport11)
AT1G53880	-0.530277	0.0456713	AT1G53880	translation initiation factor eIF-2B subunit alpha;(source:Araport11)
AT1G53900	1.04733	0.0158254	AT1G53900	Eukaryotic translation initiation factor 2B (eIF-2B) family protein;(source:Araport11)
AT1G53950	1.31063	0.00288238	AT1G53950	ubiquitin-40S ribosomal S27a-like protein;(source:Araport11)
AT1G53980	2.37315	2.73003e-09	AT1G53980	Ubiquitin-like superfamily protein;(source:Araport11)
AT1G53990	2.57987	2.57123e-12	GLIP3	GDSL-motif lipase 3;(source:Araport11)
AT1G54100	-0.461442	0.0334209	ALDH7B4	aldehyde dehydrogenase 7B4;(source:Araport11)
AT1G54130	-0.349222	0.0417253	RSH3	RELA/SPOT homolog 3;(source:Araport11)
AT1G54180	0.65282	0.0169453	BRX-LIKE3	BREVIS RADIX-like 3;(source:Araport11)
AT1G54220	-0.440505	0.0247702	AT1G54220	Dihydrolipoamide acetyltransferase, long form protein;(source:Araport11)
AT1G54340	-0.396941	0.0387277	ICDH	isocitrate dehydrogenase;(source:Araport11)
AT1G54390	0.551632	0.00158962	ING2	PHD finger protein-like protein;(source:Araport11)
AT1G54410	0.418446	0.0254827	AT1G54410	dehydrin family protein;(source:Araport11)
AT1G54490	-0.333261	0.0419455	XRN4	exoribonuclease 4;(source:Araport11)
AT1G54540	-1.14191	0.0103712	AT1G54540	Late embryogenesis abundant (LEA) hydroxyproline-rich glycoprotein family;(source:Araport11)
AT1G54570	-0.518169	0.0103712	PES1	Esterase/lipase/thioesterase family protein;(source:Araport11)
AT1G54610	0.305705	0.0348542	AT1G54610	Protein kinase superfamily protein;(source:Araport11)
AT1G54710	-0.416742	0.00714827	ATG18H	autophagy 18h-like protein;(source:Araport11)
AT1G54740	-0.872445	0.0132443	AT1G54740	FANTASTIC four-like protein (DUF3049);(source:Araport11)
AT1G54760	1.10668	0.0243392	AGL85	AGAMOUS-like 85;(source:Araport11)
AT1G54773	1.12958	0.0407714	AT1G54773	hypothetical protein;(source:Araport11)
AT1G54780	-0.328744	0.0118525	TLP18.3	thylakoid lumen 18.3 kDa protein;(source:Araport11)
AT1G54920	0.44358	0.0143523	AT1G54920	hypothetical protein;(source:Araport11)
AT1G54940	-0.98057	0.019929	PGSIP4	plant glycogenin-like starch initiation protein 4;(source:Araport11)
AT1G54950	1.5857	0.00162161	AT1G54950	transmembrane protein;(source:Araport11)
AT1G54970	-0.927747	0.00448147	PRP1	proline-rich protein 1;(source:Araport11)
AT1G55110	1.14913	3.51663e-08	IDD7	indeterminate(ID)-domain 7;(source:Araport11)
AT1G55120	-0.737616	0.0145156	FRUCT5	beta-fructofuranosidase 5;(source:Araport11)
AT1G55240	-1.28503	0.0161089	AT1G55240	proteinase inhibitor I4, serpin (DUF716);(source:Araport11)
AT1G55290	-1.3575	0.000443259	AT1G55290	2-oxoglutarate (2OG) and Fe(II)-dependent oxygenase superfamily protein;(source:Araport11)
AT1G55330	-0.749829	0.0418722	AGP21	arabinogalactan protein 21;(source:Araport11)
AT1G55390	-1.17458	0.017891	AT1G55390	Cysteine/Histidine-rich C1 domain family protein;(source:Araport11)
AT1G55420	-1.43279	0.00253141	EDA11	Cysteine/Histidine-rich C1 domain family protein;(source:Araport11)
AT1G55430	-2.31059	1.07567e-08	AT1G55430	Cysteine/Histidine-rich C1 domain family protein;(source:Araport11)
AT1G55450	1.48542	1.44524e-07	AT1G55450	S-adenosyl-L-methionine-dependent methyltransferases superfamily protein;(source:Araport11)
AT1G55650	1.10396	0.0460757	AT1G55650	HMG (high mobility group) box protein with ARID/BRIGHT DNA-binding domain-containing protein;(source:Araport11)
AT1G55670	-0.602349	0.0289366	PSAG	photosystem I subunit G;(source:Araport11)
AT1G55760	0.419013	0.00569976	AT1G55760	BTB/POZ domain-containing protein;(source:Araport11)
AT1G55860	-0.632729	0.029613	UPL1	LOW protein: E3 ubiquitin ligase-like protein;(source:Araport11)
AT1G56000	0.408412	0.0449699	AT1G56000	FAD/NAD(P)-binding oxidoreductase family protein;(source:Araport11)
AT1G56045	0.536972	0.00717034	AT1G56045	Ribosomal protein L41 family;(source:Araport11)
AT1G56060	2.22743	1.60342e-06	AT1G56060	cysteine-rich/transmembrane domain protein B;(source:Araport11)
AT1G56130	0.855047	0.0260354	AT1G56130	Leucine-rich repeat transmembrane protein kinase;(source:Araport11)
AT1G56140	0.5621	0.00917717	AT1G56140	Leucine-rich repeat transmembrane protein kinase;(source:Araport11)
AT1G56190	-0.650212	1.31466e-06	AT1G56190	Phosphoglycerate kinase family protein;(source:Araport11)
AT1G56240	5.26766	1.13363e-53	PP2-B13	phloem protein 2-B13;(source:Araport11)
AT1G56250	5.55305	5.26689e-62	PP2-B14	phloem protein 2-B14;(source:Araport11)
AT1G56430	-0.81351	0.0394891	NAS4	nicotianamine synthase 4;(source:Araport11)
AT1G56500	-0.558637	0.0013252	AT1G56500	haloacid dehalogenase-like hydrolase family protein;(source:Araport11)
AT1G56550	-1.051	4.73803e-06	RGXT3	RhamnoGalacturonan speci%26#64257;(source:Araport11)
AT1G56630	-1.04061	0.000920544	AT1G56630	alpha/beta-Hydrolases superfamily protein;(source:Araport11)
AT1G56680	0.64417	0.0479829	AT1G56680	Chitinase family protein;(source:Araport11)
AT1G57630	3.2834	3.31328e-15	AT1G57630	Toll-Interleukin-Resistance (TIR) domain family protein;(source:Araport11)
AT1G57650	2.0701	1.44595e-05	AT1G57650	ATP binding protein;(source:Araport11)
AT1G57660	0.534462	0.00954908	AT1G57660	Translation protein SH3-like family protein;(source:Araport11)
AT1G57700	0.638334	0.0494639	AT1G57700	Protein kinase superfamily protein;(source:Araport11)
AT1G58037	-1.90346	5.77942e-07	AT1G58037	Cysteine/Histidine-rich C1 domain family protein;(source:Araport11)
AT1G58235	0.636953	0.0126041	AT1G58235	hypothetical protein;(source:Araport11)
AT1G58330	1.6743	0.000577175	ZW2	transcription factor-like protein;(source:Araport11)
AT1G58370	-0.939088	0.0240051	RXF12	glycosyl hydrolase family 10 protein / carbohydrate-binding domain-containing protein;(source:Araport11)
AT1G58420	1.12316	0.0180056	AT1G58420	Uncharacterized conserved protein UCP031279;(source:Araport11)
AT1G58440	-0.459478	0.00736722	XF1	FAD/NAD(P)-binding oxidoreductase family protein;(source:Araport11)
AT1G58520	-0.494882	0.0270005	RXW8	GDSL-like lipase/acylhydrolase superfamily protein;(source:Araport11)
AT1G58643	-1.74014	0.000433859	AT1G58643	Inositol-pentakisphosphate 2-kinase family protein;(source:Araport11)
AT1G59710	-0.418714	0.0113023	AT1G59710	actin cross-linking protein (DUF569);(source:Araport11)
AT1G59725	-1.08012	0.0160714	AT1G59725	DNAJ heat shock family protein;(source:Araport11)
AT1G59865	1.87862	0.00012556	AT1G59865	transmembrane protein;(source:Araport11)
AT1G59870	0.533102	0.00501791	PEN3	ABC-2 and Plant PDR ABC-type transporter family protein;(source:Araport11)
AT1G59940	-0.838971	0.0133243	ARR3	response regulator 3;(source:Araport11)
AT1G59950	1.22861	0.0129364	AT1G59950	NAD(P)-linked oxidoreductase superfamily protein;(source:Araport11)
AT1G60050	-1.79558	8.84361e-05	UMAMIT35	Nodulin MtN21 /EamA-like transporter family protein;(source:Araport11)
AT1G60090	0.772945	0.0178671	BGLU4	beta glucosidase 4;(source:Araport11)
AT1G60420	-0.819759	0.000517522	AT1G60420	DC1 domain-containing protein;(source:Araport11)
AT1G60550	0.637786	5.07102e-06	ECHID	enoyl-CoA hydratase/isomerase D;(source:Araport11)
AT1G60710	-0.619686	3.1024e-06	ATB2	NAD(P)-linked oxidoreductase superfamily protein;(source:Araport11)
AT1G60810	-0.565152	0.0184277	ACLA-2	ATP-citrate lyase A-2;(source:Araport11)
AT1G60940	-0.519217	0.00311081	SNRK2.10	SNF1-related protein kinase 2.10;(source:Araport11)
AT1G60950	-0.412923	0.00014877	FED A	2Fe-2S ferredoxin-like superfamily protein;(source:Araport11)
AT1G61050	-1.73657	2.07032e-06	AT1G61050	alpha 1,4-glycosyltransferase family protein;(source:Araport11)
AT1G61100	-0.496776	2.0237e-05	AT1G61100	disease resistance protein (TIR class);(source:Araport11)
AT1G61190	-0.908486	5.54789e-06	AT1G61190	LRR and NB-ARC domains-containing disease resistance protein;(source:Araport11)
AT1G61260	0.633427	0.006478	AT1G61260	cotton fiber (DUF761);(source:Araport11)
AT1G61360	0.793369	0.0158061	AT1G61360	S-locus lectin protein kinase family protein;(source:Araport11)
AT1G61400	1.13679	0.00335228	AT1G61400	S-locus lectin protein kinase family protein;(source:Araport11)
AT1G61420	1.44766	1.46975e-07	AT1G61420	S-locus lectin protein kinase family protein;(source:Araport11)
AT1G61430	0.883488	0.00424533	AT1G61430	S-locus lectin protein kinase family protein;(source:Araport11)
AT1G61440	1.93024	1.8098e-05	AT1G61440	S-locus lectin protein kinase family protein;(source:Araport11)
AT1G61520	-0.410614	0.0498037	LHCA3	PSI type III chlorophyll a/b-binding protein;(source:Araport11)
AT1G61550	1.22476	0.0236062	AT1G61550	S-locus lectin protein kinase family protein;(source:Araport11)
AT1G61590	-0.768378	0.0457759	AT1G61590	Protein kinase superfamily protein;(source:Araport11)
AT1G61770	0.284222	0.0414268	AT1G61770	Chaperone DnaJ-domain superfamily protein;(source:Araport11)
AT1G61810	1.39476	0.00260326	BGLU45	beta-glucosidase 45;(source:Araport11)
AT1G61840	-1.03203	0.00200128	AT1G61840	Cysteine/Histidine-rich C1 domain family protein;(source:Araport11)
AT1G61890	-0.592809	0.00189048	AT1G61890	MATE efflux family protein;(source:Araport11)
AT1G61930	-0.88308	0.0390087	AT1G61930	senescence regulator (Protein of unknown function, DUF584);(source:Araport11)
AT1G62045	-0.95856	0.0236062	AT1G62045	ankyrin repeat protein;(source:Araport11)
AT1G62180	-1.07344	3.23668e-05	APR2	5adenylylphosphosulfate reductase 2;(source:Araport11)
AT1G62300	1.14135	3.73928e-06	WRKY6	WRKY family transcription factor;(source:Araport11)
AT1G62320	-0.942432	0.00848494	AT1G62320	ERD (early-responsive to dehydration stress) family protein;(source:Araport11)
AT1G62370	-1.30284	1.2541e-06	AT1G62370	RING/U-box superfamily protein;(source:Araport11)
AT1G62420	1.14673	0.0387969	AT1G62420	DUF506 family protein (DUF506);(source:Araport11)
AT1G62570	-1.03657	1.14656e-06	FMO GS-OX4	flavin-monooxygenase glucosinolate S-oxygenase 4;(source:Araport11)
AT1G62640	-0.492032	0.0100994	KAS III	3-ketoacyl-acyl carrier protein synthase III;(source:Araport11)
AT1G62660	-2.01285	5.36564e-19	AT1G62660	Glycosyl hydrolases family 32 protein;(source:Araport11)
AT1G62750	-0.546392	0.0116257	SCO1	Translation elongation factor EFG/EF2 protein;(source:Araport11)
AT1G62770	-0.434008	0.0221591	AT1G62770	Plant invertase/pectin methylesterase inhibitor superfamily protein;(source:Araport11)
AT1G62800	-0.567075	0.0220767	ASP4	aspartate aminotransferase 4;(source:Araport11)
AT1G62980	-0.920147	0.0286836	EXPA18	expansin A18;(source:Araport11)
AT1G63010	-0.44635	0.0003427	AT1G63010	Major Facilitator Superfamily with SPX (SYG1/Pho81/XPR1) domain-containing protein;(source:Araport11)
AT1G63090	0.808411	0.035072	PP2-A11	phloem protein 2-A11;(source:Araport11)
AT1G63140	0.707954	0.0153869	AT1G63140	O-methyltransferase family protein;(source:Araport11)
AT1G63350	1.32015	0.0117254	AT1G63350	Disease resistance protein (CC-NBS-LRR class) family;(source:Araport11)
AT1G63440	-0.622523	0.0113788	HMA5	heavy metal atpase 5;(source:Araport11)
AT1G63450	-1.5941	1.86136e-10	RHS8	root hair specific 8;(source:Araport11)
AT1G63500	-0.446262	0.0444327	BSK7	kinase with tetratricopeptide repeat domain-containing protein;(source:Araport11)
AT1G63600	-1.57519	0.00184632	AT1G63600	Receptor-like protein kinase-related family protein;(source:Araport11)
AT1G63930	-0.912157	0.0381631	ROH1	from the Czech roh meaning corner;(source:Araport11)
AT1G63940	-0.774408	8.05154e-05	MDAR6	monodehydroascorbate reductase 6;(source:Araport11)
AT1G63980	0.735174	0.000102675	AT1G63980	D111/G-patch domain-containing protein;(source:Araport11)
AT1G64065	2.12811	4.39527e-08	AT1G64065	Late embryogenesis abundant (LEA) hydroxyproline-rich glycoprotein family;(source:Araport11)
AT1G64160	2.97267	2.79579e-11	DIR5	Disease resistance-responsive (dirigent-like protein) family protein;(source:Araport11)
AT1G64190	-0.394468	0.0131796	AT1G64190	6-phosphogluconate dehydrogenase family protein;(source:Araport11)
AT1G64330	-0.421184	0.0310022	AT1G64330	myosin heavy chain-like protein;(source:Araport11)
AT1G64385	0.527955	0.000571088	AT1G64385	transmembrane protein;(source:Araport11)
AT1G64400	1.00074	0.00122266	LACS3	AMP-dependent synthetase and ligase family protein;(source:Araport11)
AT1G64430	0.426155	0.0327527	AT1G64430	Pentatricopeptide repeat (PPR) superfamily protein;(source:Araport11)
AT1G64610	0.942679	0.00553357	AT1G64610	Transducin/WD40 repeat-like superfamily protein;(source:Araport11)
AT1G64720	0.481256	0.0363693	CP5	Polyketide cyclase/dehydrase and lipid transport superfamily protein;(source:Araport11)
AT1G64930	-1.19386	0.00736722	CYP89A7	cytochrome P450, family 87, subfamily A, polypeptide 7;(source:Araport11)
AT1G64950	-0.978411	2.58955e-06	CYP89A5	cytochrome P450, family 89, subfamily A, polypeptide 5;(source:Araport11)
AT1G64970	0.993081	0.00288235	G-TMT	gamma-tocopherol methyltransferase;(source:Araport11)
AT1G65010	-0.789262	0.000741946	AT1G65010	WEB family protein (DUF827);(source:Araport11)
AT1G65032	0.625807	0.0297291	AT1G65032	COMPLEX 1 LYR-like protein;(source:Araport11)
AT1G65310	-1.60472	1.02703e-06	XTH17	xyloglucan endotransglucosylase/hydrolase 17;(source:Araport11)
AT1G65370	0.809014	0.0388577	AT1G65370	TRAF-like family protein;(source:Araport11)
AT1G65481	1.23766	0.00598667	AT1G65481	transmembrane protein;(source:Araport11)
AT1G65484	1.76409	0.000324617	AT1G65484	transmembrane protein;(source:Araport11)
AT1G65580	-0.519001	0.0100243	FRA3	Endonuclease/exonuclease/phosphatase family protein;(source:Araport11)
AT1G65610	-1.14425	0.00019797	KOR2	Six-hairpin glycosidases superfamily protein;(source:Araport11)
AT1G65840	-0.599144	6.85689e-05	PAO4	polyamine oxidase 4;(source:Araport11)
AT1G65930	-0.368753	0.00200261	cICDH	cytosolic NADP+-dependent isocitrate dehydrogenase;(source:Araport11)
AT1G65960	-0.686189	0.000774397	GAD2	glutamate decarboxylase 2;(source:Araport11)
AT1G65970	1.90024	8.58802e-05	TPX2	thioredoxin-dependent peroxidase 2;(source:Araport11)
AT1G66030	-1.13566	0.0335791	CYP96A14P	cytochrome P450, family 96, subfamily A, polypeptide 14 pseudogene;(source:Araport11)
AT1G66130	-0.540654	0.0281532	AT1G66130	NAD(P)-binding Rossmann-fold superfamily protein;(source:Araport11)
AT1G66150	-0.414396	0.00574295	TMK1	transmembrane kinase 1;(source:Araport11)
AT1G66200	-1.35227	2.31167e-05	GSR2	hypothetical protein;(source:Araport11)
AT1G66240	0.492089	0.0362112	ATX1	homolog of anti-oxidant 1;(source:Araport11)
AT1G66280	-0.679804	0.0418325	BGLU22	Glycosyl hydrolase superfamily protein;(source:Araport11)
AT1G66480	1.73425	4.46814e-07	AT1G66480	plastid movement impaired 2;(source:Araport11)
AT1G66690	2.85639	5.06956e-11	AT1G66690	S-adenosyl-L-methionine-dependent methyltransferases superfamily protein;(source:Araport11)
AT1G66700	6.24682	2.01047e-111	PXMT1	S-adenosyl-L-methionine-dependent methyltransferases superfamily protein;(source:Araport11)
AT1G66880	1.34268	3.48737e-05	AT1G66880	Protein kinase superfamily protein;(source:Araport11)
AT1G66930	1.20396	0.00704459	AT1G66930	Protein kinase superfamily protein;(source:Araport11)
AT1G67030	-1.03292	0.00419144	ZFP6	zinc finger protein 6;(source:Araport11)
AT1G67050	-0.526528	0.04783	AT1G67050	membrane-associated kinase regulator;(source:Araport11)
AT1G67070	-0.855151	0.0204963	DIN9	Mannose-6-phosphate isomerase, type I;(source:Araport11)
AT1G67100	2.02233	6.30638e-10	LBD40	LOB domain-containing protein 40;(source:Araport11)
AT1G67230	-0.321226	0.0346478	LINC1	little nuclei1;(source:Araport11)
AT1G67270	1.95382	1.79221e-05	AT1G67270	Zinc-finger domain of monoamine-oxidase A repressor R1 protein;(source:Araport11)
AT1G67330	-0.816165	6.88938e-07	AT1G67330	glucuronoxylan 4-O-methyltransferase-like protein (DUF579);(source:Araport11)
AT1G67520	1.16857	0.0036688	AT1G67520	lectin protein kinase family protein;(source:Araport11)
AT1G67840	-0.411931	0.0422727	CSK	chloroplast sensor kinase;(source:Araport11)
AT1G67910	0.456457	0.00160429	AT1G67910	hypothetical protein;(source:Araport11)
AT1G67920	1.51049	0.0016519	AT1G67920	hypothetical protein;(source:Araport11)
AT1G67980	6.26232	1.25792e-69	CCOAMT	caffeoyl-CoA 3-O-methyltransferase;(source:Araport11)
AT1G68240	1.34308	0.000757722	AT1G68240	basic helix-loop-helix (bHLH) DNA-binding superfamily protein;(source:Araport11)
AT1G68290	0.729225	0.0312904	ENDO2	endonuclease 2;(source:Araport11)
AT1G68300	-0.623029	0.046558	AT1G68300	Adenine nucleotide alpha hydrolases-like superfamily protein;(source:Araport11)
AT1G68310	0.493552	0.00608001	AE7	MIP18 family protein (DUF59);(source:Araport11)
AT1G68390	1.97773	1.73181e-08	AT1G68390	Core-2/I-branching beta-1,6-N-acetylglucosaminyltransferase family protein;(source:Araport11)
AT1G68410	-0.622414	0.0109882	AT1G68410	Protein phosphatase 2C family protein;(source:Araport11)
AT1G68440	-0.740069	0.0067616	AT1G68440	transmembrane protein;(source:Araport11)
AT1G68450	1.41743	9.89404e-05	PDE337	VQ motif-containing protein;(source:Araport11)
AT1G68460	1.5604	0.00223863	IPT1	isopentenyltransferase 1;(source:Araport11)
AT1G68520	-0.685459	0.00349823	BBX14	B-box type zinc finger protein with CCT domain-containing protein;(source:Araport11)
AT1G68530	-0.666356	0.0103021	KCS6	3-ketoacyl-CoA synthase 6;(source:Araport11)
AT1G68600	-1.89962	2.1917e-07	AT1G68600	aluminum activated malate transporter family protein;(source:Araport11)
AT1G68630	2.07986	1.3835e-05	AT1G68630	PLAC8 family protein;(source:Araport11)
AT1G68670	-0.737726	0.00954122	AT1G68670	myb-like transcription factor family protein;(source:Araport11)
AT1G68710	-0.787246	0.00485733	AT1G68710	ATPase E1-E2 type family protein / haloacid dehalogenase-like hydrolase family protein;(source:Araport11)
AT1G68740	-1.13949	0.00448648	PHO1;H1	EXS (ERD1/XPR1/SYG1) family protein;(source:Araport11)
AT1G68795	-0.984498	0.0169487	CLE12	CLAVATA3/ESR-RELATED 12;(source:Araport11)
AT1G68910	-0.483484	0.0113591	WIT2	WPP domain-interacting protein 2;(source:Araport11)
AT1G69240	-0.737383	0.00725432	MES15	methyl esterase 15;(source:Araport11)
AT1G69310	-0.836567	0.000539944	WRKY57	WRKY DNA-binding protein 57;(source:Araport11)
AT1G69510	0.409612	0.00200587	AT1G69510	cAMP-regulated phosphoprotein 19-related protein;(source:Araport11)
AT1G69520	0.88895	0.0357564	AT1G69520	S-adenosyl-L-methionine-dependent methyltransferases superfamily protein;(source:Araport11)
AT1G69530	0.552313	0.00452105	EXPA1	expansin A1;(source:Araport11)
AT1G69700	0.419846	0.0212627	HVA22C	HVA22 homologue C;(source:Araport11)
AT1G69750	0.924977	0.00111765	COX19-2	cytochrome c oxidase 19-2;(source:Araport11)
AT1G69830	-0.744076	8.05949e-05	AMY3	alpha-amylase-like 3;(source:Araport11)
AT1G69860	1.53123	0.00196619	AT1G69860	Major facilitator superfamily protein;(source:Araport11)
AT1G69890	1.18305	0.000124976	AT1G69890	actin cross-linking protein (DUF569);(source:Araport11)
AT1G69920	6.2339	2.1847e-236	GSTU12	glutathione S-transferase TAU 12;(source:Araport11)
AT1G69930	3.06356	3.94138e-12	GSTU11	glutathione S-transferase TAU 11;(source:Araport11)
AT1G70230	-0.505996	0.0411875	TBL27	TRICHOME BIREFRINGENCE-LIKE 27;(source:Araport11)
AT1G70260	-1.3063	0.00525434	UMAMIT36	nodulin MtN21 /EamA-like transporter family protein;(source:Araport11)
AT1G70300	-0.694422	2.09231e-05	KUP6	K+ uptake permease 6;(source:Araport11)
AT1G70330	-0.865929	4.44595e-05	ENT1	equilibrative nucleotide transporter 1;(source:Araport11)
AT1G70370	-0.52214	0.016895	PG2	polygalacturonase 2;(source:Araport11)
AT1G70410	-0.591934	0.000966772	BCA4	beta carbonic anhydrase 4;(source:Araport11)
AT1G70430	0.643434	0.0419637	AT1G70430	Protein kinase superfamily protein;(source:Araport11)
AT1G70460	-0.975619	8.86605e-05	PERK13	root hair specific 10;(source:Araport11)
AT1G70500	-1.12024	0.0414842	AT1G70500	Pectin lyase-like superfamily protein;(source:Araport11)
AT1G70580	-0.513724	0.0213688	AOAT2	alanine-2-oxoglutarate aminotransferase 2;(source:Araport11)
AT1G70670	-0.637217	0.0334597	CLO4	Caleosin-related family protein;(source:Araport11)
AT1G70710	0.49415	0.000244256	GH9B1	glycosyl hydrolase 9B1;(source:Araport11)
AT1G70730	-0.422826	0.0411295	PGM2	Phosphoglucomutase/phosphomannomutase family protein;(source:Araport11)
AT1G70820	-0.638219	0.00138118	AT1G70820	phosphoglucomutase, putative / glucose phosphomutase;(source:Araport11)
AT1G70850	-2.45774	3.16354e-15	MLP34	MLP-like protein 34;(source:Araport11)
AT1G70890	-1.2289	0.000765843	MLP43	MLP-like protein 43;(source:Araport11)
AT1G71200	1.23975	0.0131215	AT1G71200	basic helix-loop-helix (bHLH) DNA-binding superfamily protein;(source:Araport11)
AT1G71400	0.697945	0.00197446	RLP12	receptor like protein 12;(source:Araport11)
AT1G71520	2.57297	3.20995e-14	AT1G71520	Integrase-type DNA-binding superfamily protein;(source:Araport11)
AT1G71530	-0.760263	0.0336636	AT1G71530	Protein kinase superfamily protein;(source:Araport11)
AT1G71695	-0.369469	0.0331707	AT1G71695	Peroxidase superfamily protein;(source:Araport11)
AT1G71865	0.440777	0.0195786	AT1G71865	PyrD;(source:Araport11)
AT1G71870	-0.755755	0.00114106	AT1G71870	MATE efflux family protein;(source:Araport11)
AT1G71890	0.881917	0.00428513	SUC5	Major facilitator superfamily protein;(source:Araport11)
AT1G71970	-0.443934	0.0499716	AT1G71970	hypothetical protein;(source:Araport11)
AT1G72060	2.72562	1.90164e-16	AT1G72060	serine-type endopeptidase inhibitor;(source:Araport11)
AT1G72070	0.604828	0.0125009	AT1G72070	Chaperone DnaJ-domain superfamily protein;(source:Araport11)
AT1G72125	-1.21865	0.000836127	AT1G72125	Major facilitator superfamily protein;(source:Araport11)
AT1G72140	-1.51029	4.79696e-07	AT1G72140	Major facilitator superfamily protein;(source:Araport11)
AT1G72150	-1.09184	2.64548e-08	PATL1	PATELLIN 1;(source:Araport11)
AT1G72160	-1.37947	2.04065e-19	AT1G72160	Sec14p-like phosphatidylinositol transfer family protein;(source:Araport11)
AT1G72180	-1.14979	8.5255e-08	AT1G72180	Leucine-rich receptor-like protein kinase family protein;(source:Araport11)
AT1G72200	-1.09236	0.00149043	AT1G72200	RING/U-box superfamily protein;(source:Araport11)
AT1G72230	-0.813636	0.0119296	AT1G72230	Cupredoxin superfamily protein;(source:Araport11)
AT1G72450	0.79283	0.000326524	JAZ6	jasmonate-zim-domain protein 6;(source:Araport11)
AT1G72460	1.12685	0.0256559	AT1G72460	Leucine-rich repeat protein kinase family protein;(source:Araport11)
AT1G72470	-0.618614	0.0011539	EXO70D1	exocyst subunit exo70 family protein D1;(source:Araport11)
AT1G72520	2.12699	2.73371e-09	LOX4	PLAT/LH2 domain-containing lipoxygenase family protein;(source:Araport11)
AT1G72610	-0.384603	0.000468989	GER1	germin-like protein 1;(source:Araport11)
AT1G72700	-0.790966	7.34486e-06	AT1G72700	ATPase E1-E2 type family protein / haloacid dehalogenase-like hydrolase family protein;(source:Araport11)
AT1G72870	-0.923972	0.0451997	AT1G72870	Disease resistance protein (TIR-NBS class);(source:Araport11)
AT1G72920	1.21957	0.00585789	AT1G72920	Toll-Interleukin-Resistance (TIR) domain family protein;(source:Araport11)
AT1G72940	0.898368	0.00466318	AT1G72940	Toll-Interleukin-Resistance (TIR) domain-containing protein;(source:Araport11)
AT1G73000	-1.58305	0.00153626	PYL3	PYR1-like 3;(source:Araport11)
AT1G73120	0.30249	0.0234622	AT1G73120	F-box/RNI superfamily protein;(source:Araport11)
AT1G73220	-1.10588	0.00252775	2001-10-01	organic cation/carnitine transporter1;(source:Araport11)
AT1G73330	-1.67954	6.08626e-05	DR4	drought-repressed 4;(source:Araport11)
AT1G73580	-1.63058	2.06327e-07	AT1G73580	Calcium-dependent lipid-binding (CaLB domain) family protein;(source:Araport11)
AT1G73620	0.466704	0.0269582	AT1G73620	Pathogenesis-related thaumatin superfamily protein;(source:Araport11)
AT1G73640	-1.17983	0.00679623	RABA6a	RAB GTPase homolog A6A;(source:Araport11)
AT1G73780	-0.857883	0.0492866	AT1G73780	Bifunctional inhibitor/lipid-transfer protein/seed storage 2S albumin superfamily protein;(source:Araport11)
AT1G73805	1.15706	0.0316124	SARD1	Calmodulin binding protein-like protein;(source:Araport11)
AT1G73940	0.480466	0.00797367	AT1G73940	tumor necrosis factor receptor family protein;(source:Araport11)
AT1G74030	-0.693902	0.00445678	ENO1	enolase 1;(source:Araport11)
AT1G74080	3.48799	9.89773e-43	MYB122	myb domain protein 122;(source:Araport11)
AT1G74100	0.498838	1.20295e-05	SOT16	sulfotransferase 16;(source:Araport11)
AT1G74110	1.46666	0.00480936	CYP78A10	cytochrome P450, family 78, subfamily A, polypeptide 10;(source:Araport11)
AT1G74210	-0.349747	0.0161115	GDPD5	PLC-like phosphodiesterases superfamily protein;(source:Araport11)
AT1G74260	-0.661718	0.0411013	PUR4	purine biosynthesis 4;(source:Araport11)
AT1G74270	0.565116	0.00355453	AT1G74270	Ribosomal protein L35Ae family protein;(source:Araport11)
AT1G74310	-0.579898	0.0468701	HSP101	heat shock protein 101;(source:Araport11)
AT1G74320	0.472484	0.0413592	AT1G74320	Protein kinase superfamily protein;(source:Araport11)
AT1G74360	1.91165	9.65553e-09	AT1G74360	Leucine-rich repeat protein kinase family protein;(source:Araport11)
AT1G74458	-0.979973	0.0273016	AT1G74458	transmembrane protein;(source:Araport11)
AT1G74460	-0.969007	0.0413126	AT1G74460	GDSL-like Lipase/Acylhydrolase superfamily protein;(source:Araport11)
AT1G74470	-0.484722	0.0357908	AT1G74470	Pyridine nucleotide-disulfide oxidoreductase family protein;(source:Araport11)
AT1G74530	0.576823	0.0445508	AT1G74530	transmembrane protein;(source:Araport11)
AT1G74590	1.92334	2.74674e-06	GSTU10	glutathione S-transferase TAU 10;(source:Araport11)
AT1G74740	-0.636561	0.0069698	CPK30	calcium-dependent protein kinase 30;(source:Araport11)
AT1G74770	-1.24541	0.000412408	AT1G74770	zinc ion binding protein;(source:Araport11)
AT1G74810	1.20658	0.0275658	BOR5	HCO3- transporter family;(source:Araport11)
AT1G74830	-1.63173	1.09564e-05	AT1G74830	myosin-binding protein, putative (Protein of unknown function, DUF593);(source:Araport11)
AT1G74840	-0.460805	0.0297524	AT1G74840	Homeodomain-like superfamily protein;(source:Araport11)
AT1G75030	-1.17479	0.0281739	TLP-3	thaumatin-like protein 3;(source:Araport11)
AT1G75220	-0.53798	0.00832838	ERDL6	Major facilitator superfamily protein;(source:Araport11)
AT1G75240	0.538178	0.00190415	HB33	homeobox protein 33;(source:Araport11)
AT1G75270	-1.05898	3.35221e-05	DHAR2	dehydroascorbate reductase 2;(source:Araport11)
AT1G75280	-1.37813	2.22577e-12	AT1G75280	NmrA-like negative transcriptional regulator family protein;(source:Araport11)
AT1G75310	-0.465714	0.0139765	AUL1	auxin-like 1 protein;(source:Araport11)
AT1G75340	0.42436	0.0459565	AT1G75340	Zinc finger C-x8-C-x5-C-x3-H type family protein;(source:Araport11)
AT1G75400	0.394931	0.00560082	AT1G75400	RING/U-box superfamily protein;(source:Araport11)
AT1G75460	-0.459832	0.0021135	AT1G75460	ATP-dependent protease La (LON) domain protein;(source:Araport11)
AT1G75490	1.6469	0.000208593	AT1G75490	Integrase-type DNA-binding superfamily protein;(source:Araport11)
AT1G75500	-0.499297	0.0358517	WAT1	Walls Are Thin 1;(source:Araport11)
AT1G75620	-1.55273	3.8334e-05	AT1G75620	glyoxal oxidase-related protein;(source:Araport11)
AT1G75680	-0.379828	0.0076506	GH9B7	glycosyl hydrolase 9B7;(source:Araport11)
AT1G75750	-1.46392	3.27519e-07	GASA1	GAST1 protein homolog 1;(source:Araport11)
AT1G75800	0.479422	0.000187411	AT1G75800	Pathogenesis-related thaumatin superfamily protein;(source:Araport11)
AT1G75820	-0.594629	0.0244755	CLV1	Leucine-rich receptor-like protein kinase family protein;(source:Araport11)
AT1G75830	1.78243	0.000188435	LCR67	low-molecular-weight cysteine-rich 67;(source:Araport11)
AT1G75860	0.510672	0.00988599	AT1G75860	DNA ligase;(source:Araport11)
AT1G75900	-0.95259	0.00028558	AT1G75900	GDSL-like Lipase/Acylhydrolase superfamily protein;(source:Araport11)
AT1G76030	-0.39005	0.0100781	VAB1	ATPase, V1 complex, subunit B protein;(source:Araport11)
AT1G76070	1.23614	0.000200718	AT1G76070	hypothetical protein;(source:Araport11)
AT1G76080	-0.543042	0.0386792	CDSP32	chloroplastic drought-induced stress protein of 32 kD;(source:Araport11)
AT1G76090	-0.910771	1.03797e-05	SMT3	sterol methyltransferase 3;(source:Araport11)
AT1G76180	-0.876847	6.40637e-08	ERD14	Dehydrin family protein;(source:Araport11)
AT1G76240	-0.922981	2.14839e-06	AT1G76240	DUF241 domain protein (DUF241);(source:Araport11)
AT1G76300	0.48894	0.0106912	SmD3	snRNP core protein SMD3;(source:Araport11)
AT1G76490	-0.694938	5.2405e-06	HMG1	hydroxy methylglutaryl CoA reductase 1;(source:Araport11)
AT1G76550	-0.63925	3.21973e-05	AT1G76550	Phosphofructokinase family protein;(source:Araport11)
AT1G76600	1.00796	0.00646734	AT1G76600	poly polymerase;(source:Araport11)
AT1G76650	1.75504	1.92549e-09	CML38	calmodulin-like 38;(source:Araport11)
AT1G76680	-1.0188	0.000128729	OPR1	12-oxophytodienoate reductase 1;(source:Araport11)
AT1G76690	-1.05667	2.76972e-05	OPR2	12-oxophytodienoate reductase 2;(source:Araport11)
AT1G76720	1.18855	2.01763e-05	AT1G76720	eukaryotic translation initiation factor 2 (eIF-2) family protein;(source:Araport11)
AT1G76930	0.924431	0.03175	EXT4	extensin 4;(source:Araport11)
AT1G77020	-0.665972	0.0243689	AT1G77020	DNAJ heat shock N-terminal domain-containing protein;(source:Araport11)
AT1G77120	1.47617	1.43767e-08	ADH1	alcohol dehydrogenase 1;(source:Araport11)
AT1G77130	-0.329928	0.0299661	PGSIP2	plant glycogenin-like starch initiation protein 2;(source:Araport11)
AT1G77330	-0.663381	0.00574295	AT1G77330	2-oxoglutarate (2OG) and Fe(II)-dependent oxygenase superfamily protein;(source:Araport11)
AT1G77380	0.637311	0.00507246	AAP3	amino acid permease 3;(source:Araport11)
AT1G77450	-0.620468	0.0140955	NAC032	NAC domain containing protein 32;(source:Araport11)
AT1G77490	-0.70873	0.00122908	TAPX	thylakoidal ascorbate peroxidase;(source:Araport11)
AT1G77590	-0.461316	0.00388533	LACS9	long chain acyl-CoA synthetase 9;(source:Araport11)
AT1G77690	-0.552056	0.00127132	LAX3	like AUX1 3;(source:Araport11)
AT1G77710	0.368566	0.0295369	CCP2	ubiquitin-fold modifier;(source:Araport11)
AT1G77940	0.60173	0.000270207	AT1G77940	Ribosomal protein L7Ae/L30e/S12e/Gadd45 family protein;(source:Araport11)
AT1G78000	-1.49697	1.90712e-05	SULTR1;2	sulfate transporter 1;(source:Araport11)
AT1G78010	0.537431	0.0381812	AT1G78010	tRNA modification GTPase;(source:Araport11)
AT1G78050	-0.970679	0.0046433	PGM	phosphoglycerate/bisphosphoglycerate mutase;(source:Araport11)
AT1G78080	0.471877	0.0471375	RAP2.4	related to AP2 4;(source:Araport11)
AT1G78090	-1.06075	0.019929	TPPB	trehalose-6-phosphate phosphatase;(source:Araport11)
AT1G78340	-1.09889	0.00535164	GSTU22	glutathione S-transferase TAU 22;(source:Araport11)
AT1G78380	-0.962905	3.67439e-07	GSTU19	glutathione S-transferase TAU 19;(source:Araport11)
AT1G78410	2.68273	4.22279e-10	AT1G78410	VQ motif-containing protein;(source:Araport11)
AT1G78490	-0.640472	0.00692961	CYP708A3	cytochrome P450, family 708, subfamily A, polypeptide 3;(source:Araport11)
AT1G78620	-0.404542	0.041093	AT1G78620	integral membrane protein (Protein of unknown function DUF92, transmembrane);(source:Araport11)
AT1G78680	-0.546182	0.00870286	GGH2	gamma-glutamyl hydrolase 2;(source:Araport11)
AT1G78690	0.69265	0.00474588	At1g78690p	Phospholipid/glycerol acyltransferase family protein;(source:Araport11)
AT1G78830	0.951985	4.5803e-08	AT1G78830	Curculin-like (mannose-binding) lectin family protein;(source:Araport11)
AT1G78850	1.30678	4.84266e-07	AT1G78850	D-mannose binding lectin protein with Apple-like carbohydrate-binding domain-containing protein;(source:Araport11)
AT1G78900	-0.599065	0.000518274	VHA-A	vacuolar ATP synthase subunit A;(source:Araport11)
AT1G78990	-1.39614	0.00343048	AT1G78990	HXXXD-type acyl-transferase family protein;(source:Araport11)
AT1G79090	-0.430969	0.0477946	AT1G79090	topoisomerase II-associated protein;(source:Araport11)
AT1G79230	-0.441649	0.0414842	MST1	mercaptopyruvate sulfurtransferase 1;(source:Araport11)
AT1G79250	-1.22792	0.00567366	AGC1.7	AGC kinase 1.7;(source:Araport11)
AT1G79270	-0.898169	0.000274878	ECT8	evolutionarily conserved C-terminal region 8;(source:Araport11)
AT1G79320	-1.43899	0.00394253	MC6	metacaspase 6;(source:Araport11)
AT1G79340	-0.660049	0.00692174	MC4	metacaspase 4;(source:Araport11)
AT1G79410	-1.01412	3.56836e-05	2005-10-01	organic cation/carnitine transporter5;(source:Araport11)
AT1G79440	-0.438565	0.00701932	ALDH5F1	aldehyde dehydrogenase 5F1;(source:Araport11)
AT1G79450	-0.542688	0.0419505	ALIS5	ALA-interacting subunit 5;(source:Araport11)
AT1G79520	-1.10114	0.03175	AT1G79520	Cation efflux family protein;(source:Araport11)
AT1G79550	-0.390687	0.00638783	PGK	phosphoglycerate kinase;(source:Araport11)
AT1G79570	-0.553397	0.00300762	AT1G79570	kinase superfamily with octicosapeptide/Phox/Bem1p domain-containing protein;(source:Araport11)
AT1G79620	-0.866639	0.002746	AT1G79620	Leucine-rich repeat protein kinase family protein;(source:Araport11)
AT1G79680	5.2045	8.43326e-46	WAKL10	WALL ASSOCIATED KINASE (WAK)-LIKE 10;(source:Araport11)
AT1G79710	-0.695672	0.0059077	AT1G79710	Major facilitator superfamily protein;(source:Araport11)
AT1G79870	-0.501856	0.00351509	AT1G79870	D-isomer specific 2-hydroxyacid dehydrogenase family protein;(source:Araport11)
AT1G79880	0.617064	0.00779745	La2	RNA recognition motif (RRM)-containing protein;(source:Araport11)
AT1G79920	-0.659251	0.0069408	Hsp70-15	Heat shock protein 70 (Hsp 70) family protein;(source:Araport11)
AT1G80120	-0.740755	0.0446465	AT1G80120	LURP-one-like protein (DUF567);(source:Araport11)
AT1G80240	-1.03836	0.00289203	DGR1	choice-of-anchor C domain protein, putative (Protein of unknown function, DUF642);(source:Araport11)
AT1G80310	-0.816282	0.00111765	MOT2	sulfate transmembrane transporter;(source:Araport11)
AT1G80340	0.957518	0.0162486	GA3OX2	gibberellin 3-oxidase 2;(source:Araport11)
AT1G80360	-0.512757	0.0210043	AT1G80360	Pyridoxal phosphate (PLP)-dependent transferases superfamily protein;(source:Araport11)
AT1G80640	0.482984	0.0027905	AT1G80640	Protein kinase superfamily protein;(source:Araport11)
AT1G80650	0.451481	0.0459917	RTL1	RNAse THREE-like protein 1;(source:Araport11)
AT1G80700	0.727847	0.00313345	AT1G80700	stress response NST1-like protein;(source:Araport11)
AT1G80820	1.89167	4.59531e-10	CCR2	cinnamoyl coa reductase;(source:Araport11)
AT1G80840	1.83056	1.08621e-09	WRKY40	WRKY DNA-binding protein 40;(source:Araport11)
AT1G80940	0.435123	0.0158792	AT1G80940	Snf1 kinase interactor-like protein;(source:Araport11)
AT1G80980	0.803909	0.00954908	AT1G80980	stress response NST1-like protein;(source:Araport11)
AT2G01008	1.10467	0.000643034	AT2G01008	maternal effect embryo arrest protein;(source:Araport11)
AT2G01021	1.04009	0.00198111	AT2G01021	hypothetical protein;(source:Araport11)
AT2G01100	0.462121	0.0339864	AT2G01100	FAM133-like protein;(source:Araport11)
AT2G01260	-0.606276	0.00978813	AT2G01260	hypothetical protein (DUF789);(source:Araport11)
AT2G01340	1.35684	1.1991e-05	At17.1	plastid movement impaired protein;(source:Araport11)
AT2G01379	2.78407	1.08621e-09	AT2G01379	transmembrane protein;(source:Araport11)
AT2G01410	-0.518312	0.000508811	AT2G01410	NHL domain-containing protein;(source:Araport11)
AT2G01420	-0.724778	0.000508811	PIN4	Auxin efflux carrier family protein;(source:Araport11)
AT2G01450	0.604409	0.00170446	MPK17	MAP kinase 17;(source:Araport11)
AT2G01520	-2.5368	3.62156e-10	MLP328	MLP-like protein 328;(source:Araport11)
AT2G01530	-1.60569	0.00125749	MLP329	MLP-like protein 329;(source:Araport11)
AT2G01580	-1.11022	0.0443469	AT2G01580	transmembrane protein;(source:Araport11)
AT2G01820	-0.365291	0.026979	AT2G01820	Leucine-rich repeat protein kinase family protein;(source:Araport11)
AT2G01830	-0.685074	0.021104	WOL	CHASE domain containing histidine kinase protein;(source:Araport11)
AT2G01880	-1.45763	7.14033e-05	PAP7	purple acid phosphatase 7;(source:Araport11)
AT2G01910	-0.393823	0.0147683	ATMAP65-6	Microtubule associated protein (MAP65/ASE1) family protein;(source:Araport11)
AT2G01950	-0.725791	0.000326524	BRL2	BRI1-like 2;(source:Araport11)
AT2G02010	2.2602	1.80953e-06	GAD4	glutamate decarboxylase 4;(source:Araport11)
AT2G02120	0.920477	0.0293945	PDF2.1	Scorpion toxin-like knottin superfamily protein;(source:Araport11)
AT2G02130	-0.824135	4.92635e-06	LCR68	low-molecular-weight cysteine-rich 68;(source:Araport11)
AT2G02320	1.15391	0.0195049	PP2-B7	phloem protein 2-B7;(source:Araport11)
AT2G02470	0.388092	0.0379048	AL6	alfin-like 6;(source:Araport11)
AT2G02610	-0.888613	0.01534	AT2G02610	Cysteine/Histidine-rich C1 domain family protein;(source:Araport11)
AT2G02810	0.581222	0.00669289	UTR1	UDP-galactose transporter 1;(source:Araport11)
AT2G02860	0.407756	0.0255407	SUT2	sucrose transporter 2;(source:Araport11)
AT2G02930	4.22382	1.32199e-43	GSTF3	glutathione S-transferase F3;(source:Araport11)
AT2G02990	-2.56556	1.41598e-46	RNS1	ribonuclease 1;(source:Araport11)
AT2G03120	0.409164	0.000920775	SPP	signal peptide peptidase;(source:Araport11)
AT2G03200	-1.5515	0.000220107	AT2G03200	Eukaryotic aspartyl protease family protein;(source:Araport11)
AT2G03290	1.06184	0.0382537	AT2G03290	emp24/gp25L/p24 family/GOLD family protein;(source:Araport11)
AT2G03360	-0.699009	0.0465177	AT2G03360	Glycosyltransferase family 61 protein;(source:Araport11)
AT2G03370	-2.20468	1.95412e-13	AT2G03370	O-linked-mannose beta-1,4-N-acetylglucosaminyltransferase-like protein;(source:Araport11)
AT2G03410	1.44356	0.00569976	AT2G03410	Mo25 family protein;(source:Araport11)
AT2G03450	-0.626224	0.0321211	PAP9	purple acid phosphatase 9;(source:Araport11)
AT2G03550	-0.609076	0.00290963	AT2G03550	alpha/beta-Hydrolases superfamily protein;(source:Araport11)
AT2G04040	1.5989	3.01222e-14	DTX1	MATE efflux family protein;(source:Araport11)
AT2G04050	1.18849	0.0152748	AT2G04050	MATE efflux family protein;(source:Araport11)
AT2G04170	-1.34253	3.8334e-05	AT2G04170	TRAF-like family protein;(source:Araport11)
AT2G04400	1.24182	6.60848e-12	AT2G04400	Aldolase-type TIM barrel family protein;(source:Araport11)
AT2G04680	-1.25759	7.37503e-06	AT2G04680	Cysteine/Histidine-rich C1 domain family protein;(source:Araport11)
AT2G04780	-0.499691	0.015407	FLA7	FASCICLIN-like arabinoogalactan 7;(source:Araport11)
AT2G05070	-0.488952	0.0412554	LHCB2.2	photosystem II light harvesting complex protein 2.2;(source:Araport11)
AT2G05100	-0.455307	0.0353562	LHCB2.1	photosystem II light harvesting complex protein 2.1;(source:Araport11)
AT2G05170	-0.620108	0.000693608	VPS11	vacuolar protein sorting 11;(source:Araport11)
AT2G05910	-1.10219	0.041296	AT2G05910	LURP-one-like protein (DUF567);(source:Araport11)
AT2G05990	-0.551933	0.00190415	MOD1	NAD(P)-binding Rossmann-fold superfamily protein;(source:Araport11)
AT2G06010	0.562062	0.00815486	ORG4	OBP3-responsive protein 4 (ORG4);(source:Araport11)
AT2G06850	-0.92775	0.000468989	XTH4	xyloglucan endotransglucosylase/hydrolase 4;(source:Araport11)
AT2G07050	-0.562816	0.0341903	CAS1	cycloartenol synthase 1;(source:Araport11)
AT2G07180	0.780605	0.00546954	AT2G07180	Protein kinase superfamily protein;(source:Araport11)
AT2G07638	1.18972	0.0307047	AT2G07638	hypothetical protein;(source:Araport11)
AT2G07698	1.28448	0.00087733	AT2G07698	ATPase, F1 complex, alpha subunit protein;(source:Araport11)
AT2G07715	0.86627	0.0141803	AT2G07715	Nucleic acid-binding, OB-fold-like protein;(source:Araport11)
AT2G07718	0.795843	0.019929	AT2G07718	Cytochrome b/b6 protein;(source:Araport11)
AT2G07727	1.94024	7.36783e-07	AT2G07727	cytochrome b;(source:Araport11)
AT2G07734	1.07007	0.0262531	AT2G07734	Alpha-L RNA-binding motif/Ribosomal protein S4 family protein;(source:Araport11)
AT2G07815	1.11509	0.0357872	AT2G07815	LOW protein: cytochrome C biogenesis ccmF-like protein;(source:Araport11)
AT2G07835	2.82771	7.02423e-11	AT2G07835	hypothetical protein;(source:Araport11)
AT2G10940	-0.33262	0.0214714	AT2G10940	Bifunctional inhibitor/lipid-transfer protein/seed storage 2S albumin superfamily protein;(source:Araport11)
AT2G11225	0.835422	0.000986821	AT2G11225	hypothetical protein;(source:Araport11)
AT2G12400	-0.704123	0.000175602	AT2G12400	plasma membrane fusion protein;(source:Araport11)
AT2G13360	-0.613854	0.0237766	AGT	alanine:glyoxylate aminotransferase;(source:Araport11)
AT2G13450	1.61688	0.000903152	AT2G13450	Ta11-like non-LTR retrotransposon;(source:Araport11)
AT2G13560	-0.348635	0.0378735	NAD-ME1	NAD-dependent malic enzyme 1;(source:Araport11)
AT2G13660	1.09333	0.042435	AT2G13660	hypothetical protein;(source:Araport11)
AT2G13790	0.613816	0.0256441	SERK4	somatic embryogenesis receptor-like kinase 4;(source:Araport11)
AT2G14045	0.646013	0.0152255	AT2G14045	c-Myc-binding protein;(source:Araport11)
AT2G14095	-1.21792	0.0189946	AT2G14095	hypothetical protein;(source:Araport11)
AT2G14247	1.84477	4.82245e-07	AT2G14247	Expressed protein;(source:Araport11)
AT2G14255	0.568107	0.020541	AT2G14255	Ankyrin repeat family protein with DHHC zinc finger domain-containing protein;(source:Araport11)
AT2G14460	0.607053	0.0435036	AT2G14460	hypothetical protein;(source:Araport11)
AT2G14510	1.45711	0.0041476	AT2G14510	Leucine-rich repeat protein kinase family protein;(source:Araport11)
AT2G14530	0.453656	0.0202019	TBL13	TRICHOME BIREFRINGENCE-LIKE 13;(source:Araport11)
AT2G14750	0.482853	0.00167916	APK	APS kinase;(source:Araport11)
AT2G14960	-0.859838	0.0406566	GH3.1	Auxin-responsive GH3 family protein;(source:Araport11)
AT2G15000	0.482932	0.0347664	AT2G15000	caspase-6 protein;(source:Araport11)
AT2G15220	4.45563	2.17552e-54	AT2G15220	Plant basic secretory protein (BSP) family protein;(source:Araport11)
AT2G15300	-0.954923	0.0103891	AT2G15300	Leucine-rich repeat protein kinase family protein;(source:Araport11)
AT2G15370	-1.61794	4.86009e-10	FUT5	fucosyltransferase 5;(source:Araport11)
AT2G15390	-0.643462	0.0301791	FUT4	fucosyltransferase 4;(source:Araport11)
AT2G15620	-2.35091	4.67278e-31	NIR1	nitrite reductase 1;(source:Araport11)
AT2G15760	1.23065	0.000411233	AT2G15760	calmodulin-binding protein (DUF1645);(source:Araport11)
AT2G15910	0.632613	0.000513093	AT2G15910	CSL zinc finger domain-containing protein;(source:Araport11)
AT2G15970	-1.15595	4.64933e-05	COR413-PM1	cold regulated 413 plasma membrane 1;(source:Araport11)
AT2G16060	1.67503	6.41608e-09	HB1	hemoglobin 1;(source:Araport11)
AT2G16280	-0.58732	0.00650781	KCS9	3-ketoacyl-CoA synthase 9;(source:Araport11)
AT2G16365	0.664694	0.000151777	AT2G16365	F-box family protein;(source:Araport11)
AT2G16586	1.154	2.45759e-21	AT2G16586	transmembrane protein;(source:Araport11)
AT2G16600	-0.612697	0.00294558	ROC3	rotamase CYP 3;(source:Araport11)
AT2G16900	0.529492	0.0204068	AT2G16900	phospholipase-like protein (PEARLI 4) family protein;(source:Araport11)
AT2G16920	-0.586418	0.000435393	UBC23	ubiquitin-conjugating enzyme 23;(source:Araport11)
AT2G16940	0.486516	0.000924126	AT2G16940	Splicing factor, CC1-like protein;(source:Araport11)
AT2G16950	-0.387821	0.0278986	TRN1	transportin 1;(source:Araport11)
AT2G16970	-1.37339	0.000488072	MEE15	Major facilitator superfamily protein;(source:Araport11)
AT2G16980	-1.46768	7.37145e-12	AT2G16980	Major facilitator superfamily protein;(source:Araport11)
AT2G17130	-0.722171	7.08777e-05	IDH2	isocitrate dehydrogenase subunit 2;(source:Araport11)
AT2G17240	0.389893	0.0370317	AT2G17240	arginine/serine-rich-like splicing factor;(source:Araport11)
AT2G17290	-0.442058	0.0264737	CPK6	Calcium-dependent protein kinase family protein;(source:Araport11)
AT2G17360	0.397844	0.0419524	AT2G17360	Ribosomal protein S4 (RPS4A) family protein;(source:Araport11)
AT2G17500	-0.825235	0.000298352	AT2G17500	Auxin efflux carrier family protein;(source:Araport11)
AT2G17550	-0.626131	0.0198543	TRM26	RB1-inducible coiled-coil protein;(source:Araport11)
AT2G17590	-1.08887	0.0414047	AT2G17590	Cysteine/Histidine-rich C1 domain family protein;(source:Araport11)
AT2G17740	3.42853	4.29367e-16	AT2G17740	Cysteine/Histidine-rich C1 domain family protein;(source:Araport11)
AT2G17790	-0.396412	0.0203253	VPS35A	vacuolar protein sorting-associated 35A-like protein;(source:Araport11)
AT2G17820	-0.550376	0.0220226	HK1	histidine kinase 1;(source:Araport11)
AT2G17830	0.787026	0.0233734	AT2G17830	F-box and associated interaction domains-containing protein;(source:Araport11)
AT2G17840	-0.648282	0.000188198	ERD7	Senescence/dehydration-associated protein-like protein;(source:Araport11)
AT2G17850	1.51812	0.000468989	AT2G17850	Rhodanese/Cell cycle control phosphatase superfamily protein;(source:Araport11)
AT2G17890	-0.795729	0.0455899	CPK16	calcium-dependent protein kinase 16;(source:Araport11)
AT2G18150	1.2988	0.00485733	AT2G18150	Peroxidase superfamily protein;(source:Araport11)
AT2G18390	0.566892	0.0014114	TTN5	ADP-ribosylation factor family protein;(source:Araport11)
AT2G18490	-1.57351	0.000490754	AT2G18490	C2H2-like zinc finger protein;(source:Araport11)
AT2G18660	1.11642	0.0451023	PNP-A	plant natriuretic peptide A;(source:Araport11)
AT2G18670	0.837226	0.000323392	AT2G18670	RING/U-box superfamily protein;(source:Araport11)
AT2G18680	1.02973	0.00294966	AT2G18680	transmembrane protein;(source:Araport11)
AT2G18730	-0.713744	0.00085054	DGK3	diacylglycerol kinase 3;(source:Araport11)
AT2G18800	-2.08095	8.04687e-09	XTH21	xyloglucan endotransglucosylase/hydrolase 21;(source:Araport11)
AT2G18980	-1.55334	3.63863e-12	AT2G18980	Peroxidase superfamily protein;(source:Araport11)
AT2G19110	-0.747374	0.000520719	HMA4	heavy metal atpase 4;(source:Araport11)
AT2G19190	1.93915	2.73113e-06	FRK1	FLG22-induced receptor-like kinase 1;(source:Araport11)
AT2G19570	-0.73026	1.23986e-06	CDA1	cytidine deaminase 1;(source:Araport11)
AT2G19590	1.3122	1.96435e-08	ACO1	ACC oxidase 1;(source:Araport11)
AT2G19740	0.473675	0.0463039	AT2G19740	Ribosomal protein L31e family protein;(source:Araport11)
AT2G19750	0.53363	0.000998447	AT2G19750	Ribosomal protein S30 family protein;(source:Araport11)
AT2G19760	-0.789012	0.000274085	PRF1	profilin 1;(source:Araport11)
AT2G19810	0.666398	0.0387773	OZF1	CCCH-type zinc finger family protein;(source:Araport11)
AT2G19880	-0.41591	0.0232746	AT2G19880	Nucleotide-diphospho-sugar transferases superfamily protein;(source:Araport11)
AT2G20060	0.501213	0.00728873	AT2G20060	Ribosomal protein L4/L1 family;(source:Araport11)
AT2G20180	0.612713	0.000652333	PIL5	phytochrome interacting factor 3-like 5;(source:Araport11)
AT2G20190	-0.599966	0.00166942	CLASP	CLIP-associated protein;(source:Araport11)
AT2G20390	0.482194	0.0395384	AT2G20390	cytochrome oxidase complex assembly protein;(source:Araport11)
AT2G20450	0.569303	0.0213412	AT2G20450	Ribosomal protein L14;(source:Araport11)
AT2G20490	0.473193	0.0255145	NOP10	nucleolar RNA-binding Nop10p family protein;(source:Araport11)
AT2G20520	-0.856729	0.033825	FLA6	FASCICLIN-like arabinogalactan 6;(source:Araport11)
AT2G20530	0.338684	0.0330836	PHB6	prohibitin 6;(source:Araport11)
AT2G20630	-0.764503	0.0003177	PIA1	PP2C induced by AVRRPM1;(source:Araport11)
AT2G20670	-1.00672	5.53852e-05	AT2G20670	sugar phosphate exchanger, putative (DUF506);(source:Araport11)
AT2G20750	-0.75508	0.00198111	EXPB1	expansin B1;(source:Araport11)
AT2G20900	0.627262	0.0011372	DGK5	diacylglycerol kinase 5;(source:Araport11)
AT2G20990	-0.438771	0.00157485	SYTA	synaptotagmin A;(source:Araport11)
AT2G21010	1.05739	0.0379048	AT2G21010	Calcium-dependent lipid-binding (CaLB domain) family protein;(source:Araport11)
AT2G21330	-0.663281	2.8362e-05	FBA1	fructose-bisphosphate aldolase 1;(source:Araport11)
AT2G21420	1.01982	0.0386792	AT2G21420	IBR domain containing protein;(source:Araport11)
AT2G21840	-1.18742	0.00020217	AT2G21840	Cysteine/Histidine-rich C1 domain family protein;(source:Araport11)
AT2G21900	-1.19445	0.00931583	WRKY59	WRKY DNA-binding protein 59;(source:Araport11)
AT2G21990	1.69733	0.000468418	AT2G21990	MIZU-KUSSEI-like protein (Protein of unknown function, DUF617);(source:Araport11)
AT2G22060	1.03929	0.0395604	AT2G22060	galactose oxidase/kelch repeat protein;(source:Araport11)
AT2G22125	-0.411156	0.0321183	CSI1	binding protein;(source:Araport11)
AT2G22330	1.44474	4.68559e-12	CYP79B3	cytochrome P450, family 79, subfamily B, polypeptide 3;(source:Araport11)
AT2G22470	-0.996277	0.000264461	AGP2	arabinogalactan protein 2;(source:Araport11)
AT2G22480	-0.651352	8.27842e-05	PFK5	phosphofructokinase 5;(source:Araport11)
AT2G22490	0.480615	0.00288235	CYCD2;1	Cyclin D2;(source:Araport11)
AT2G22500	-0.642644	0.00223422	UCP5	uncoupling protein 5;(source:Araport11)
AT2G22560	-1.03842	1.73206e-07	NET2D	Kinase interacting (KIP1-like) family protein;(source:Araport11)
AT2G22660	-0.989509	1.98105e-07	AT2G22660	DNA-binding protein, putative (duplicated DUF1399);(source:Araport11)
AT2G22880	2.49337	3.52937e-14	AT2G22880	VQ motif-containing protein;(source:Araport11)
AT2G22920	-0.7511	0.0296096	SCPL12	serine carboxypeptidase-like 12;(source:Araport11)
AT2G22930	-1.30632	0.00781907	AT2G22930	UDP-Glycosyltransferase superfamily protein;(source:Araport11)
AT2G22970	-0.550666	0.0275929	SCPL11	serine carboxypeptidase-like 11;(source:Araport11)
AT2G23170	0.918164	0.000404104	GH3.3	Auxin-responsive GH3 family protein;(source:Araport11)
AT2G23180	-1.03257	0.00147441	CYP96A1	cytochrome P450, family 96, subfamily A, polypeptide 1;(source:Araport11)
AT2G23260	1.68356	0.000569356	UGT84B1	UDP-glucosyl transferase 84B1;(source:Araport11)
AT2G23270	2.48979	7.39354e-08	AT2G23270	transmembrane protein;(source:Araport11)
AT2G23320	1.51448	1.20971e-06	WRKY15	WRKY DNA-binding protein 15;(source:Araport11)
AT2G23410	-1.58195	0.000688774	CPT	cis-prenyltransferase;(source:Araport11)
AT2G23630	-0.781719	0.0221174	sks16	SKU5 similar 16;(source:Araport11)
AT2G23680	1.63054	0.000137243	AT2G23680	Cold acclimation protein WCOR413 family;(source:Araport11)
AT2G23830	1.28554	0.00914579	AT2G23830	PapD-like superfamily protein;(source:Araport11)
AT2G23930	0.692777	7.56986e-05	SNRNP-G	Putative small nuclear ribonucleoprotein G;(source:Araport11)
AT2G24180	1.82578	1.6643e-29	CYP71B6	cytochrome p450 71b6;(source:Araport11)
AT2G24200	0.329968	0.0393745	LAP1	Cytosol aminopeptidase family protein;(source:Araport11)
AT2G24290	0.446261	0.0233997	AT2G24290	ubiquitin-associated protein (DUF1068);(source:Araport11)
AT2G24580	-0.543441	0.00952687	AT2G24580	FAD-dependent oxidoreductase family protein;(source:Araport11)
AT2G24600	1.54352	2.35894e-06	AT2G24600	Ankyrin repeat family protein;(source:Araport11)
AT2G24610	-0.622294	0.0035769	CNGC14	cyclic nucleotide-gated channel 14;(source:Araport11)
AT2G24680	1.18406	0.0119816	AT2G24680	transcriptional factor B3 family protein;(source:Araport11)
AT2G24762	-1.19369	0.00779213	GDU4	glutamine dumper 4;(source:Araport11)
AT2G24820	-0.477828	0.0388201	TIC55-II	translocon at the inner envelope membrane of chloroplasts 55-II;(source:Araport11)
AT2G24980	-0.771661	0.0459565	EXT6	Proline-rich extensin-like family protein;(source:Araport11)
AT2G25080	-0.625821	0.0184399	GPX1	glutathione peroxidase 1;(source:Araport11)
AT2G25160	-1.56666	0.00218688	CYP82F1	cytochrome P450, family 82, subfamily F, polypeptide 1;(source:Araport11)
AT2G25297	3.57643	1.66664e-18	AT2G25297	transmembrane protein;(source:Araport11)
AT2G25450	-1.05404	6.84064e-25	AT2G25450	2-oxoglutarate (2OG) and Fe(II)-dependent oxygenase superfamily protein;(source:Araport11)
AT2G25480	0.455893	0.0147102	AT2G25480	TPX2 (targeting protein for Xklp2) protein family;(source:Araport11)
AT2G25735	1.95897	2.51382e-07	AT2G25735	hypothetical protein;(source:Araport11)
AT2G25810	-0.929499	4.22906e-09	TIP4;1	tonoplast intrinsic protein 4;(source:Araport11)
AT2G25964	1.0073	0.00411947	AT2G25964	hypothetical protein;(source:Araport11)
AT2G26040	1.20865	5.71949e-05	PYL2	PYR1-like 2;(source:Araport11)
AT2G26170	-0.662486	0.0145641	CYP711A1	cytochrome P450, family 711, subfamily A, polypeptide 1;(source:Araport11)
AT2G26190	0.795318	0.00103586	AT2G26190	calmodulin-binding family protein;(source:Araport11)
AT2G26280	0.341209	0.0286965	CID7	CTC-interacting domain 7;(source:Araport11)
AT2G26290	-1.20739	0.00397348	ARSK1	root-specific kinase 1;(source:Araport11)
AT2G26300	0.526929	0.00231234	GP ALPHA 1	G protein alpha subunit 1;(source:Araport11)
AT2G26410	-1.06139	0.0310608	Iqd4	IQ-domain 4;(source:Araport11)
AT2G26430	0.367183	0.031905	RCY1	arginine-rich cyclin 1;(source:Araport11)
AT2G26530	1.62999	2.77969e-08	AR781	AR781, pheromone receptor-like protein (DUF1645);(source:Araport11)
AT2G26560	3.30445	2.08634e-88	PLA2A	phospholipase A 2A;(source:Araport11)
AT2G26570	-0.644507	9.37553e-06	WEB1	WEAK CHLOROPLAST MOVEMENT UNDER BLUE LIGHT-like protein (DUF827);(source:Araport11)
AT2G26640	-1.01019	8.09077e-08	KCS11	3-ketoacyl-CoA synthase 11;(source:Araport11)
AT2G26690	-0.984665	2.82047e-08	AT2G26690	Major facilitator superfamily protein;(source:Araport11)
AT2G26810	0.582954	0.0148054	AT2G26810	Putative methyltransferase family protein;(source:Araport11)
AT2G26850	1.14035	0.0227404	AT2G26850	F-box family protein;(source:Araport11)
AT2G26890	-0.691821	0.00284825	GRV2	DNAJ heat shock N-terminal domain-containing protein;(source:Araport11)
AT2G27000	-0.813751	1.70016e-06	CYP705A8	cytochrome P450, family 705, subfamily A, polypeptide 8;(source:Araport11)
AT2G27010	-0.52992	0.0282888	CYP705A9	cytochrome P450, family 705, subfamily A, polypeptide 9;(source:Araport11)
AT2G27130	0.992173	0.0160906	AT2G27130	Bifunctional inhibitor/lipid-transfer protein/seed storage 2S albumin superfamily protein;(source:Araport11)
AT2G27180	1.14126	0.0388577	AT2G27180	hypothetical protein;(source:Araport11)
AT2G27330	0.582527	0.0245192	AT2G27330	RNA-binding (RRM/RBD/RNP motifs) family protein;(source:Araport11)
AT2G27340	0.670059	0.0329011	AT2G27340	N-acetylglucosaminylphosphatidylinositol de-N-acetylase family protein;(source:Araport11)
AT2G27370	-1.0885	0.000121315	CASP3	Uncharacterized protein family (UPF0497);(source:Araport11)
AT2G27430	-1.17921	0.000293365	AT2G27430	ARM repeat superfamily protein;(source:Araport11)
AT2G27510	-0.682025	0.00939579	FD3	ferredoxin 3;(source:Araport11)
AT2G27660	-0.916769	0.0151989	AT2G27660	Cysteine/Histidine-rich C1 domain family protein;(source:Araport11)
AT2G27775	0.562789	0.0441429	AT2G27775	PPR containing protein;(source:Araport11)
AT2G27820	-0.514723	0.000866639	PD1	prephenate dehydratase 1;(source:Araport11)
AT2G27830	0.681627	0.00535389	AT2G27830	hypothetical protein;(source:Araport11)
AT2G28110	-1.0984	0.00284313	FRA8	Exostosin family protein;(source:Araport11)
AT2G28160	-1.1839	0.00290585	FRU	FER-like regulator of iron uptake;(source:Araport11)
AT2G28200	-0.611064	0.0169502	AT2G28200	C2H2-type zinc finger family protein;(source:Araport11)
AT2G28210	1.96333	1.03676e-07	ACA2	alpha carbonic anhydrase 2;(source:Araport11)
AT2G28305	0.757086	0.000482889	LOG1	Putative lysine decarboxylase family protein;(source:Araport11)
AT2G28400	0.808747	0.0011539	AT2G28400	senescence regulator (Protein of unknown function, DUF584);(source:Araport11)
AT2G28440	-0.833482	0.00604596	AT2G28440	proline-rich family protein;(source:Araport11)
AT2G28450	0.382552	0.0488328	AT2G28450	zinc finger (CCCH-type) family protein;(source:Araport11)
AT2G28470	-0.565092	0.000853504	BGAL8	beta-galactosidase 8;(source:Araport11)
AT2G28670	-1.59307	1.60586e-12	ESB1	Disease resistance-responsive (dirigent-like protein) family protein;(source:Araport11)
AT2G28755	1.1481	0.0201451	AT2G28755	UDP-D-glucuronate carboxy-lyase-like protein;(source:Araport11)
AT2G28780	-2.27903	1.2487e-09	AT2G28780	P-hydroxybenzoic acid efflux pump subunit;(source:Araport11)
AT2G28840	0.51923	0.00667996	XBAT31	hypothetical protein;(source:Araport11)
AT2G29040	2.47361	1.15996e-07	AT2G29040	Exostosin family protein;(source:Araport11)
AT2G29100	1.26972	0.0150286	GLR2.9	glutamate receptor 2.9;(source:Araport11)
AT2G29110	1.17759	0.0255093	GLR2.8	glutamate receptor 2.8;(source:Araport11)
AT2G29340	0.963932	0.0261441	AT2G29340	NAD-dependent epimerase/dehydratase family protein;(source:Araport11)
AT2G29400	0.565575	0.00381714	TOPP1	type one protein phosphatase 1;(source:Araport11)
AT2G29420	-0.702116	0.0409136	GSTU7	glutathione S-transferase tau 7;(source:Araport11)
AT2G29450	-0.500679	0.0184399	GSTU5	glutathione S-transferase tau 5;(source:Araport11)
AT2G29460	3.06055	3.1305e-29	GSTU4	glutathione S-transferase tau 4;(source:Araport11)
AT2G29490	-1.15752	1.25796e-06	GSTU1	glutathione S-transferase TAU 1;(source:Araport11)
AT2G29500	-0.950828	0.00532789	AT2G29500	HSP20-like chaperones superfamily protein;(source:Araport11)
AT2G29550	-0.604047	0.00261242	TUB7	tubulin beta-7 chain;(source:Araport11)
AT2G29620	-0.969274	0.00604232	AT2G29620	dentin sialophosphoprotein;(source:Araport11)
AT2G29630	-0.992711	9.23154e-08	THIC	thiaminC;(source:Araport11)
AT2G29660	-0.48889	0.0249442	AT2G29660	zinc finger (C2H2 type) family protein;(source:Araport11)
AT2G29720	2.06577	2.21794e-12	CTF2B	FAD/NAD(P)-binding oxidoreductase family protein;(source:Araport11)
AT2G29730	-1.28327	9.10018e-08	UGT71D1	UDP-glucosyl transferase 71D1;(source:Araport11)
AT2G29750	-1.83288	7.25525e-17	UGT71C1	UDP-glucosyl transferase 71C1;(source:Araport11)
AT2G29900	-0.546549	0.0382537	PS2	Presenilin-2;(source:Araport11)
AT2G29940	-0.991216	0.00723805	ABCG31	pleiotropic drug resistance 3;(source:Araport11)
AT2G29980	0.657294	0.000595657	FAD3	fatty acid desaturase 3;(source:Araport11)
AT2G30000	0.647594	0.029613	AT2G30000	PHF5-like protein;(source:Araport11)
AT2G30110	-0.681175	0.00225603	UBA1	ubiquitin-activating enzyme 1;(source:Araport11)
AT2G30200	-0.468127	0.00166399	EMB3147	EMBRYO DEFECTIVE 3147;(source:Araport11)
AT2G30210	-1.80456	4.60046e-26	LAC3	laccase 3;(source:Araport11)
AT2G30260	0.34408	0.0378842	U2B''	U2 small nuclear ribonucleoprotein B;(source:Araport11)
AT2G30360	-0.753186	0.000160382	SIP4	SOS3-interacting protein 4;(source:Araport11)
AT2G30395	-1.01396	0.0179266	OFP17	ovate family protein 17;(source:Araport11)
AT2G30520	-0.442578	0.000104612	RPT2	Phototropic-responsive NPH3 family protein;(source:Araport11)
AT2G30670	-1.56438	0.00223863	AT2G30670	NAD(P)-binding Rossmann-fold superfamily protein;(source:Araport11)
AT2G30720	0.622114	0.0248458	AT2G30720	Thioesterase/thiol ester dehydrase-isomerase superfamily protein;(source:Araport11)
AT2G30750	7.70143	8.81903e-246	CYP71A12	cytochrome P450 family 71 polypeptide;(source:Araport11)
AT2G30770	7.64164	5.92769e-135	CYP71A13	cytochrome P450 family 71 polypeptide;(source:Araport11)
AT2G30860	0.596186	0.000139022	GSTF9	glutathione S-transferase PHI 9;(source:Araport11)
AT2G30930	-0.801504	0.0371113	AT2G30930	hypothetical protein;(source:Araport11)
AT2G30950	-0.465883	0.00104266	VAR2	FtsH extracellular protease family;(source:Araport11)
AT2G31020	-0.780405	0.00385153	ORP1A	OSBP(oxysterol binding protein)-related protein 1A;(source:Araport11)
AT2G31040	-0.420814	0.0229502	AT2G31040	ATP synthase protein I-like protein;(source:Araport11)
AT2G31141	1.35333	0.000410929	AT2G31141	hypothetical protein;(source:Araport11)
AT2G31160	0.94844	0.0129125	LSH3	LIGHT-DEPENDENT SHORT HYPOCOTYLS-like protein (DUF640);(source:Araport11)
AT2G31230	1.77496	1.94495e-07	ERF15	ethylene-responsive element binding factor 15;(source:Araport11)
AT2G31345	2.20648	3.48989e-06	AT2G31345	transmembrane protein;(source:Araport11)
AT2G31390	-0.290104	0.0462224	AT2G31390	pfkB-like carbohydrate kinase family protein;(source:Araport11)
AT2G31540	-1.451	0.00537847	AT2G31540	GDSL-like Lipase/Acylhydrolase superfamily protein;(source:Araport11)
AT2G31750	-0.84095	0.00549054	UGT74D1	UDP-glucosyl transferase 74D1;(source:Araport11)
AT2G31945	1.49738	0.00153328	AT2G31945	transmembrane protein;(source:Araport11)
AT2G31960	-0.665319	0.00537847	GSL03	glucan synthase-like 3;(source:Araport11)
AT2G32020	1.28139	0.000986805	AT2G32020	Acyl-CoA N-acyltransferases (NAT) superfamily protein;(source:Araport11)
AT2G32030	1.11176	0.0123916	AT2G32030	Acyl-CoA N-acyltransferases (NAT) superfamily protein;(source:Araport11)
AT2G32150	-0.864703	0.0257405	AT2G32150	Haloacid dehalogenase-like hydrolase (HAD) superfamily protein;(source:Araport11)
AT2G32210	1.23268	0.0036151	AT2G32210	cysteine-rich/transmembrane domain A-like protein;(source:Araport11)
AT2G32240	-0.427809	0.0138969	AT2G32240	early endosome antigen;(source:Araport11)
AT2G32300	-0.760868	0.000293943	UCC1	uclacyanin 1;(source:Araport11)
AT2G32440	0.570988	0.0204068	KAO2	ent-kaurenoic acid hydroxylase 2;(source:Araport11)
AT2G32450	-0.734797	0.00546954	AT2G32450	Calcium-binding tetratricopeptide family protein;(source:Araport11)
AT2G32530	-1.03106	0.005836	CSLB03	cellulose synthase-like B3;(source:Araport11)
AT2G32540	-0.879437	8.27842e-05	CSLB04	cellulose synthase-like B4;(source:Araport11)
AT2G32620	-1.84317	0.000181642	CSLB02	cellulose synthase-like B;(source:Araport11)
AT2G32690	-0.655186	0.00379622	GRP23	glycine-rich protein 23;(source:Araport11)
AT2G32800	-0.519509	0.0184407	AP4.3A	protein kinase family protein;(source:Araport11)
AT2G32860	-1.10949	0.0434422	BGLU33	beta glucosidase 33;(source:Araport11)
AT2G32885	1.31879	0.0124194	AT2G32885	Rapid alkalinization factor (RALF) family protein;(source:Araport11)
AT2G32890	1.61423	0.00141681	RALFL17	RALF-like 17;(source:Araport11)
AT2G33190	1.82804	0.00016335	AT2G33190	F-box only protein (DUF295);(source:Araport11)
AT2G33230	-1.09148	0.042435	YUC7	YUCCA 7;(source:Araport11)
AT2G33250	0.472996	0.00899547	AT2G33250	transmembrane protein;(source:Araport11)
AT2G33370	0.515921	1.11998e-05	AT2G33370	Ribosomal protein L14p/L23e family protein;(source:Araport11)
AT2G33585	0.950946	0.000936558	AT2G33585	subtilisin-like protease;(source:Araport11)
AT2G33600	0.518841	0.0435613	CRL2	NAD(P)-binding Rossmann-fold superfamily protein;(source:Araport11)
AT2G33710	1.24014	5.19862e-05	AT2G33710	Integrase-type DNA-binding superfamily protein;(source:Araport11)
AT2G33770	-0.616092	0.000177133	PHO2	phosphate 2;(source:Araport11)
AT2G33790	-1.85508	5.11573e-21	AGP30	arabinogalactan protein 30;(source:Araport11)
AT2G34355	0.698544	0.0211366	AT2G34355	Major facilitator superfamily protein;(source:Araport11)
AT2G34390	2.53867	1.75424e-09	NIP2;1	NOD26-like intrinsic protein 2;(source:Araport11)
AT2G34490	-1.23321	0.00168718	CYP710A2	cytochrome P450, family 710, subfamily A, polypeptide 2;(source:Araport11)
AT2G34590	-0.463322	0.0290134	AT2G34590	Transketolase family protein;(source:Araport11)
AT2G34610	-1.46777	0.00456493	AT2G34610	cotton fiber protein;(source:Araport11)
AT2G34620	-0.471741	0.0281428	AT2G34620	Mitochondrial transcription termination factor family protein;(source:Araport11)
AT2G34660	-0.853427	7.91491e-09	ABCC2	multidrug resistance-associated protein 2;(source:Araport11)
AT2G34690	0.478476	0.0132443	ACD11	Glycolipid transfer protein (GLTP) family protein;(source:Araport11)
AT2G34810	-0.872294	0.000925642	AT2G34810	FAD-binding Berberine family protein;(source:Araport11)
AT2G34830	-0.746338	0.0385511	WRKY35	WRKY DNA-binding protein 35;(source:Araport11)
AT2G35020	-0.431731	0.0463039	GlcNAc1pUT2	N-acetylglucosamine-1-phosphate uridylyltransferase 2;(source:Araport11)
AT2G35050	-0.496419	0.00311452	AT2G35050	kinase superfamily with octicosapeptide/Phox/Bem1p domain-containing protein;(source:Araport11)
AT2G35240	0.394705	0.0472167	MORF6	plastid developmental protein DAG;(source:Araport11)
AT2G35390	0.627765	0.000579595	AT2G35390	Phosphoribosyltransferase family protein;(source:Araport11)
AT2G35730	1.18039	0.0120975	AT2G35730	Heavy metal transport/detoxification superfamily protein;(source:Araport11)
AT2G35820	0.671252	0.00910581	AT2G35820	ureidoglycolate hydrolase;(source:Araport11)
AT2G35860	-0.556762	0.00013902	FLA16	FASCICLIN-like arabinogalactan protein 16 precursor;(source:Araport11)
AT2G35920	0.44761	0.0172759	AT2G35920	RNA helicase family protein;(source:Araport11)
AT2G35930	1.81631	3.21489e-13	PUB23	plant U-box 23;(source:Araport11)
AT2G35980	2.72718	4.2988e-18	YLS9	Late embryogenesis abundant (LEA) hydroxyproline-rich glycoprotein family;(source:Araport11)
AT2G36026	0.897147	0.000238347	AT2G36026	Ovate family protein;(source:Araport11)
AT2G36100	-1.226	1.52691e-07	CASP1	Uncharacterized protein family (UPF0497);(source:Araport11)
AT2G36160	0.531523	0.00107449	AT2G36160	Ribosomal protein S11 family protein;(source:Araport11)
AT2G36220	0.998533	0.00810994	AT2G36220	hypothetical protein;(source:Araport11)
AT2G36290	-0.456246	0.0115803	AT2G36290	alpha/beta-Hydrolases superfamily protein;(source:Araport11)
AT2G36310	-0.926464	3.54825e-06	URH1	uridine-ribohydrolase 1;(source:Araport11)
AT2G36380	-1.03767	1.82853e-11	ABCG34	pleiotropic drug resistance 6;(source:Araport11)
AT2G36430	-0.769229	0.030043	AT2G36430	transmembrane protein, putative (DUF247);(source:Araport11)
AT2G36530	-0.569451	0.00264209	LOS2	Enolase;(source:Araport11)
AT2G36740	0.576966	0.0121914	SWC2	DNA binding protein SWC2;(source:Araport11)
AT2G36770	3.07358	7.25063e-25	AT2G36770	UDP-Glycosyltransferase superfamily protein;(source:Araport11)
AT2G36830	-0.876683	0.00120769	GAMMA-TIP	gamma tonoplast intrinsic protein;(source:Araport11)
AT2G36880	-0.459472	0.0472051	MAT3	methionine adenosyltransferase 3;(source:Araport11)
AT2G36900	0.546684	0.043576	MEMB11	membrin 11;(source:Araport11)
AT2G36930	0.85362	5.95382e-10	AT2G36930	zinc finger (C2H2 type) family protein;(source:Araport11)
AT2G36950	0.941013	0.00229963	AT2G36950	Heavy metal transport/detoxification superfamily protein;(source:Araport11)
AT2G37040	-0.642519	0.000661519	PAL1	PHE ammonia lyase 1;(source:Araport11)
AT2G37130	-0.986394	0.0046	AT2G37130	Peroxidase superfamily protein;(source:Araport11)
AT2G37170	-1.13235	0.000458839	PIP2B	plasma membrane intrinsic protein 2;(source:Araport11)
AT2G37180	-1.24442	2.94479e-05	RD28	Aquaporin-like superfamily protein;(source:Araport11)
AT2G37200	0.840036	2.25029e-09	AT2G37200	Uncharacterized protein family (UPF0497);(source:Araport11)
AT2G37210	1.44662	0.000598494	LOG3	lysine decarboxylase family protein;(source:Araport11)
AT2G37250	0.343713	0.0398808	ADK	adenosine kinase;(source:Araport11)
AT2G37340	0.322389	0.0297524	RS2Z33	arginine/serine-rich zinc knuckle-containing protein 33;(source:Araport11)
AT2G37430	1.496	9.16098e-05	ZAT11	C2H2 and C2HC zinc fingers superfamily protein;(source:Araport11)
AT2G37540	-1.53371	3.23077e-08	AT2G37540	NAD(P)-binding Rossmann-fold superfamily protein;(source:Araport11)
AT2G37640	0.516356	0.000254063	EXP3	Barwin-like endoglucanases superfamily protein;(source:Araport11)
AT2G37670	-0.689666	0.00335151	AT2G37670	Transducin/WD40 repeat-like superfamily protein;(source:Araport11)
AT2G37700	-1.23007	0.000365539	AT2G37700	Fatty acid hydroxylase superfamily;(source:Araport11)
AT2G37760	-0.613629	0.0303391	AKR4C8	NAD(P)-linked oxidoreductase superfamily protein;(source:Araport11)
AT2G37770	-1.36239	0.00123536	ChlAKR	NAD(P)-linked oxidoreductase superfamily protein;(source:Araport11)
AT2G37870	-1.69582	0.000577175	AT2G37870	Bifunctional inhibitor/lipid-transfer protein/seed storage 2S albumin superfamily protein;(source:Araport11)
AT2G38040	-0.638421	1.21482e-06	CAC3	acetyl Co-enzyme a carboxylase carboxyltransferase alpha subunit;(source:Araport11)
AT2G38080	-0.7361	0.0091122	IRX12	Laccase/Diphenol oxidase family protein;(source:Araport11)
AT2G38170	-0.854221	0.000139022	CAX1	cation exchanger 1;(source:Araport11)
AT2G38210	1.29074	5.53072e-07	PDX1L4	putative PDX1-like protein 4;(source:Araport11)
AT2G38230	0.478233	0.0167127	PDX1.1	pyridoxine biosynthesis 1.1;(source:Araport11)
AT2G38400	0.408408	0.00701932	AGT3	alanine:glyoxylate aminotransferase 3;(source:Araport11)
AT2G38470	2.06943	8.38488e-12	WRKY33	WRKY DNA-binding protein 33;(source:Araport11)
AT2G38480	-0.60808	0.0441651	AT2G38480	Uncharacterized protein family (UPF0497);(source:Araport11)
AT2G38530	0.682379	1.47456e-06	LTP2	lipid transfer protein 2;(source:Araport11)
AT2G38695	0.685301	0.0420902	AT2G38695	Gag-Pol polyprotein/retrotransposon;(source:Araport11)
AT2G38750	-1.1037	8.08452e-05	ANNAT4	annexin 4;(source:Araport11)
AT2G38760	-0.800392	0.000208367	ANNAT3	annexin 3;(source:Araport11)
AT2G38800	-0.643787	0.00693423	AT2G38800	Plant calmodulin-binding protein-like protein;(source:Araport11)
AT2G38860	2.6952	7.38394e-77	YLS5	Class I glutamine amidotransferase-like superfamily protein;(source:Araport11)
AT2G38870	2.31325	3.81323e-19	AT2G38870	Serine protease inhibitor, potato inhibitor I-type family protein;(source:Araport11)
AT2G38960	0.442422	0.00891538	ERO2	endoplasmic reticulum oxidoreductins 2;(source:Araport11)
AT2G39030	3.81289	1.38673e-19	NATA1	Acyl-CoA N-acyltransferases (NAT) superfamily protein;(source:Araport11)
AT2G39040	-2.24328	1.26129e-07	AT2G39040	Peroxidase superfamily protein;(source:Araport11)
AT2G39050	-1.43574	1.71229e-09	EULS3	hydroxyproline-rich glycoprotein family protein;(source:Araport11)
AT2G39100	0.770602	0.0367982	AT2G39100	RING/U-box superfamily protein;(source:Araport11)
AT2G39180	-0.739622	4.63741e-05	CCR2	CRINKLY4 related 2;(source:Araport11)
AT2G39200	1.28865	2.40904e-06	MLO12	Seven transmembrane MLO family protein;(source:Araport11)
AT2G39310	-1.13484	0.000129283	JAL22	jacalin-related lectin 22;(source:Araport11)
AT2G39360	-0.855002	0.00218688	AT2G39360	Protein kinase superfamily protein;(source:Araport11)
AT2G39400	1.7276	0.00013339	AT2G39400	alpha/beta-Hydrolases superfamily protein;(source:Araport11)
AT2G39420	-1.18178	1.69944e-07	AT2G39420	alpha/beta-Hydrolases superfamily protein;(source:Araport11)
AT2G39430	-1.66714	1.71662e-20	AT2G39430	Disease resistance-responsive (dirigent-like protein) family protein;(source:Araport11)
AT2G39510	-3.83948	8.52504e-26	UMAMIT14	nodulin MtN21 /EamA-like transporter family protein;(source:Araport11)
AT2G39660	0.675042	0.0077979	BIK1	botrytis-induced kinase1;(source:Araport11)
AT2G39700	0.529354	0.000129283	EXPA4	expansin A4;(source:Araport11)
AT2G39730	-0.642026	0.00129726	RCA	rubisco activase;(source:Araport11)
AT2G39760	0.320498	0.0236	BPM3	BTB/POZ/MATH-domains containing protein;(source:Araport11)
AT2G39770	0.34856	0.00288238	CYT1	Glucose-1-phosphate adenylyltransferase family protein;(source:Araport11)
AT2G39790	1.91156	8.94451e-05	AT2G39790	Mitochondrial glycoprotein family protein;(source:Araport11)
AT2G39870	0.331991	0.0110202	AT2G39870	hypothetical protein;(source:Araport11)
AT2G39890	0.61438	0.0032766	PROT1	proline transporter 1;(source:Araport11)
AT2G39900	-0.529496	0.00012111	WLIM2a	GATA type zinc finger transcription factor family protein;(source:Araport11)
AT2G39970	0.463169	0.00713894	PXN	Mitochondrial substrate carrier family protein;(source:Araport11)
AT2G39980	0.481439	0.0349651	AT2G39980	HXXXD-type acyl-transferase family protein;(source:Araport11)
AT2G40000	0.982867	7.48408e-05	HSPRO2	ortholog of sugar beet HS1 PRO-1 2;(source:Araport11)
AT2G40085	0.809618	0.0179848	AT2G40085	hypothetical protein;(source:Araport11)
AT2G40140	0.965712	0.000221912	CZF1	zinc finger (CCCH-type) family protein;(source:Araport11)
AT2G40160	-0.817762	0.0247524	TBL30	trichome birefringence-like protein (DUF828);(source:Araport11)
AT2G40220	1.26173	1.42291e-05	ABI4	Integrase-type DNA-binding superfamily protein;(source:Araport11)
AT2G40340	0.691683	0.0311831	DREB2C	Integrase-type DNA-binding superfamily protein;(source:Araport11)
AT2G40460	-0.996313	0.0192954	AT2G40460	Major facilitator superfamily protein;(source:Araport11)
AT2G40740	1.13901	0.0213015	WRKY55	WRKY DNA-binding protein 55;(source:Araport11)
AT2G40750	-1.65128	0.000545763	WRKY54	WRKY DNA-binding protein 54;(source:Araport11)
AT2G40850	1.12566	0.0380254	PI4K GAMMA 1	phosphoinositide 4-kinase gamma 1;(source:Araport11)
AT2G40890	-0.802962	1.57542e-07	CYP98A3	cytochrome P450, family 98, subfamily A, polypeptide 3;(source:Araport11)
AT2G40900	-0.943478	0.00667996	UMAMIT11	nodulin MtN21 /EamA-like transporter family protein;(source:Araport11)
AT2G40960	0.522811	0.0312667	AT2G40960	Single-stranded nucleic acid binding R3H protein;(source:Araport11)
AT2G41010	0.811307	0.0352801	CAMBP25	calmodulin (CAM)-binding protein of 25 kDa;(source:Araport11)
AT2G41100	1.60919	3.40571e-06	TCH3	Calcium-binding EF hand family protein;(source:Araport11)
AT2G41140	-0.461281	0.015629	CRK1	CDPK-related kinase 1;(source:Araport11)
AT2G41220	-0.836103	1.89704e-12	GLU2	glutamate synthase 2;(source:Araport11)
AT2G41230	2.45676	5.58537e-26	ORS1	ORGAN SIZE-like protein;(source:Araport11)
AT2G41280	2.76875	3.4942e-14	M10	late embryogenesis abundant protein (M10) / LEA protein M10;(source:Araport11)
AT2G41330	-0.797509	0.00974037	AT2G41330	Glutaredoxin family protein;(source:Araport11)
AT2G41340	0.733708	0.00404857	RPB5D	RNA polymerase II fifth largest subunit, D;(source:Araport11)
AT2G41660	-1.45672	1.82559e-12	MIZ1	MIZU-KUSSEI-like protein (Protein of unknown function, DUF617);(source:Araport11)
AT2G41710	0.611669	0.00278244	AT2G41710	Integrase-type DNA-binding superfamily protein;(source:Araport11)
AT2G41740	-0.93776	6.95134e-09	VLN2	villin 2;(source:Araport11)
AT2G41770	-0.689627	0.00216058	AT2G41770	transmembrane protein, putative (DUF288);(source:Araport11)
AT2G41830	-0.598638	0.0210444	AT2G41830	Uncharacterized protein;(source:Araport11)
AT2G41840	0.446677	0.0150579	AT2G41840	Ribosomal protein S5 family protein;(source:Araport11)
AT2G41880	0.757316	0.00831375	GK-1	guanylate kinase 1;(source:Araport11)
AT2G41905	0.962297	0.0488886	AT2G41905	transmembrane protein;(source:Araport11)
AT2G41945	0.668676	0.00596527	AT2G41945	transmembrane protein;(source:Araport11)
AT2G41970	-0.99843	0.000819028	AT2G41970	Protein kinase superfamily protein;(source:Araport11)
AT2G42010	-0.662996	0.000444743	PLDBETA1	phospholipase D beta 1;(source:Araport11)
AT2G42040	-0.537477	0.0438195	AT2G42040	WRC protein;(source:Araport11)
AT2G42170	0.593725	0.0122888	AT2G42170	Actin family protein;(source:Araport11)
AT2G42190	0.364658	0.0451514	AT2G42190	rho GTPase-activating gacO-like protein;(source:Araport11)
AT2G42280	0.473695	0.00717034	FBH4	basic helix-loop-helix (bHLH) DNA-binding superfamily protein;(source:Araport11)
AT2G42360	1.58401	0.00046871	AT2G42360	RING/U-box superfamily protein;(source:Araport11)
AT2G42490	-0.72586	5.80214e-06	AT2G42490	Copper amine oxidase family protein;(source:Araport11)
AT2G42590	-0.318828	0.0414842	GRF9	general regulatory factor 9;(source:Araport11)
AT2G42600	-0.534326	0.0011018	PPC2	phosphoenolpyruvate carboxylase 2;(source:Araport11)
AT2G42690	-0.64011	0.00140141	AT2G42690	alpha/beta-Hydrolases superfamily protein;(source:Araport11)
AT2G42790	0.642749	0.00482034	CSY3	citrate synthase 3;(source:Araport11)
AT2G42850	-1.17906	0.0148888	CYP718	cytochrome P450, family 718;(source:Araport11)
AT2G42890	-0.63805	0.011304	ML2	MEI2-like 2;(source:Araport11)
AT2G42960	0.481533	0.00801228	AT2G42960	Protein kinase superfamily protein;(source:Araport11)
AT2G42980	1.54928	0.000550056	AT2G42980	Eukaryotic aspartyl protease family protein;(source:Araport11)
AT2G43000	3.5312	2.06335e-38	NAC042	NAC domain containing protein 42;(source:Araport11)
AT2G43050	-0.94445	0.00891228	ATPMEPCRD	Plant invertase/pectin methylesterase inhibitor superfamily;(source:Araport11)
AT2G43130	0.475368	0.00739046	ARA4	P-loop containing nucleoside triphosphate hydrolases superfamily protein;(source:Araport11)
AT2G43140	0.775025	1.41698e-05	AT2G43140	basic helix-loop-helix (bHLH) DNA-binding superfamily protein;(source:Araport11)
AT2G43240	0.392312	0.0300059	AT2G43240	Nucleotide-sugar transporter family protein;(source:Araport11)
AT2G43290	-0.820529	0.0186954	MSS3	Calcium-binding EF-hand family protein;(source:Araport11)
AT2G43350	0.600142	0.0121814	GPX3	glutathione peroxidase 3;(source:Araport11)
AT2G43510	1.08021	0.000638248	TI1	trypsin inhibitor protein 1;(source:Araport11)
AT2G43535	-0.793129	0.00851947	AT2G43535	Scorpion toxin-like knottin superfamily protein;(source:Araport11)
AT2G43570	1.5973	2.01763e-05	CHI	chitinase;(source:Araport11)
AT2G43590	1.15097	0.00267298	AT2G43590	Chitinase family protein;(source:Araport11)
AT2G43620	3.42518	7.10779e-60	AT2G43620	Chitinase family protein;(source:Araport11)
AT2G43760	0.495726	0.0109142	AT2G43760	molybdopterin biosynthesis MoaE family protein;(source:Araport11)
AT2G43820	-0.777796	1.17493e-05	UGT74F2	UDP-glucosyltransferase 74F2;(source:Araport11)
AT2G43840	-0.791132	0.00808934	UGT74F1	UDP-glycosyltransferase 74 F1;(source:Araport11)
AT2G43910	-0.483523	0.00164174	HOL1	HARMLESS TO OZONE LAYER 1;(source:Araport11)
AT2G43970	0.390514	0.00189379	LARP6b	RNA-binding protein;(source:Araport11)
AT2G44060	-0.326624	0.017262	AT2G44060	Late embryogenesis abundant protein, group 2;(source:Araport11)
AT2G44080	0.804776	2.55653e-07	ARL	ARGOS-like protein;(source:Araport11)
AT2G44100	-0.348382	0.0121914	GDI1	guanosine nucleotide diphosphate dissociation inhibitor 1;(source:Araport11)
AT2G44110	-1.24335	0.000461432	MLO15	Seven transmembrane MLO family protein;(source:Araport11)
AT2G44130	-0.948305	0.0399877	AT2G44130	Galactose oxidase/kelch repeat superfamily protein;(source:Araport11)
AT2G44230	-1.10245	9.47268e-07	AT2G44230	hypothetical protein (DUF946);(source:Araport11)
AT2G44280	0.524082	0.0103712	AT2G44280	Major facilitator superfamily protein;(source:Araport11)
AT2G44300	-0.998772	1.50167e-07	AT2G44300	Bifunctional inhibitor/lipid-transfer protein/seed storage 2S albumin superfamily protein;(source:Araport11)
AT2G44350	-0.762179	5.79231e-06	ATCS	Citrate synthase family protein;(source:Araport11)
AT2G44360	0.641803	0.00823712	AT2G44360	ecotropic viral integration site protein;(source:Araport11)
AT2G44370	1.29291	0.00188926	AT2G44370	Cysteine/Histidine-rich C1 domain family protein;(source:Araport11)
AT2G44450	-1.02798	0.00128094	BGLU15	beta glucosidase 15;(source:Araport11)
AT2G44460	-1.91498	1.15799e-06	BGLU28	beta glucosidase 28;(source:Araport11)
AT2G44500	-0.427035	0.0147331	AT2G44500	O-fucosyltransferase family protein;(source:Araport11)
AT2G44578	1.82772	2.63676e-05	AT2G44578	RING/U-box superfamily protein;(source:Araport11)
AT2G45000	0.470003	0.00797367	EMB2766	structural constituent of nuclear pore;(source:Araport11)
AT2G45050	0.586036	0.0162778	GATA2	GATA transcription factor 2;(source:Araport11)
AT2G45180	-0.865136	0.00546111	AT2G45180	Bifunctional inhibitor/lipid-transfer protein/seed storage 2S albumin superfamily protein;(source:Araport11)
AT2G45190	0.697469	4.87878e-07	AFO	Plant-specific transcription factor YABBY family protein;(source:Araport11)
AT2G45200	0.457302	0.0306536	GOS12	golgi snare 12;(source:Araport11)
AT2G45250	0.447305	0.0383225	AT2G45250	integral membrane hemolysin-III-like protein;(source:Araport11)
AT2G45290	-0.525958	0.043576	AT2G45290	Transketolase;(source:Araport11)
AT2G45310	-0.465748	0.0494185	GAE4	UDP-D-glucuronate 4-epimerase 4;(source:Araport11)
AT2G45360	1.13179	0.0373156	AT2G45360	ankyrin repeat/KH domain protein (DUF1442);(source:Araport11)
AT2G45400	-0.653172	0.00353983	BEN1	NAD(P)-binding Rossmann-fold superfamily protein;(source:Araport11)
AT2G45470	-0.353266	0.0274388	FLA8	FASCICLIN-like arabinogalactan protein 8;(source:Araport11)
AT2G45560	-0.432268	0.0124295	CYP76C1	cytochrome P450, family 76, subfamily C, polypeptide 1;(source:Araport11)
AT2G45570	4.32296	1.47045e-27	CYP76C2	cytochrome P450, family 76, subfamily C, polypeptide 2;(source:Araport11)
AT2G45720	-0.930115	5.27577e-05	AT2G45720	ARM repeat superfamily protein;(source:Araport11)
AT2G45730	0.488179	0.00259107	AT2G45730	eukaryotic initiation factor 3 gamma subunit family protein;(source:Araport11)
AT2G45750	-0.968984	2.39793e-06	AT2G45750	S-adenosyl-L-methionine-dependent methyltransferases superfamily protein;(source:Araport11)
AT2G45760	1.27723	0.0168613	BAP2	BON association protein 2;(source:Araport11)
AT2G45810	-0.4742	0.018619	AT2G45810	DEA(D/H)-box RNA helicase family protein;(source:Araport11)
AT2G45890	-1.35421	3.18675e-05	ROPGEF4	RHO guanyl-nucleotide exchange factor 4;(source:Araport11)
AT2G46060	-0.436928	0.0480176	AT2G46060	transmembrane protein-like protein;(source:Araport11)
AT2G46160	0.782406	0.016402	AT2G46160	RING/U-box superfamily protein;(source:Araport11)
AT2G46280	0.412108	0.028048	TRIP-1	TGF-beta receptor interacting protein 1;(source:Araport11)
AT2G46330	0.466133	0.0392978	AGP16	arabinogalactan protein 16;(source:Araport11)
AT2G46340	-0.45297	0.00673944	SPA1	SPA (suppressor of phyA-105) protein family;(source:Araport11)
AT2G46430	1.42015	0.000157961	CNGC3	cyclic nucleotide gated channel 3;(source:Araport11)
AT2G46450	0.884632	3.63417e-06	CNGC12	cyclic nucleotide-gated channel 12;(source:Araport11)
AT2G46630	-0.589112	0.000802174	AT2G46630	serine/arginine repetitive matrix protein;(source:Araport11)
AT2G46650	2.04398	4.77453e-26	CB5-C	cytochrome B5 isoform C;(source:Araport11)
AT2G46680	-1.38019	1.79134e-09	HB-7	homeobox 7;(source:Araport11)
AT2G46740	-1.2193	3.76005e-21	GulLO5	D-arabinono-1,4-lactone oxidase family protein;(source:Araport11)
AT2G46750	1.115	0.00804044	GulLO2	D-arabinono-1,4-lactone oxidase family protein;(source:Araport11)
AT2G46860	-0.8665	0.0213412	PPa3	pyrophosphorylase 3;(source:Araport11)
AT2G47000	-0.547585	0.0013398	ABCB4	ATP binding cassette subfamily B4;(source:Araport11)
AT2G47040	1.0018	0.0407756	VGD1	Plant invertase/pectin methylesterase inhibitor superfamily;(source:Araport11)
AT2G47070	-0.422007	0.0299344	SPL1	squamosa promoter binding protein-like 1;(source:Araport11)
AT2G47130	0.539533	0.0438899	SDR3	NAD(P)-binding Rossmann-fold superfamily protein;(source:Araport11)
AT2G47230	0.756192	0.0101208	DUF6	agenet domain protein (DOMAIN OF UNKNOWN FUNCTION 724 6);(source:Araport11)
AT2G47270	-0.870274	0.00329964	UPB1	transcription factor UPBEAT protein;(source:Araport11)
AT2G47360	-1.49668	2.89001e-08	AT2G47360	transmembrane protein;(source:Araport11)
AT2G47390	-0.557054	0.00893511	AT2G47390	Prolyl oligopeptidase family protein;(source:Araport11)
AT2G47420	0.596381	0.000119905	DIM1A	Ribosomal RNA adenine dimethylase family protein;(source:Araport11)
AT2G47500	-0.396987	0.0420187	AT2G47500	P-loop nucleoside triphosphate hydrolases superfamily protein with CH (Calponin Homology) domain-containing protein;(source:Araport11)
AT2G47520	1.42264	0.00136742	ERF71	Integrase-type DNA-binding superfamily protein;(source:Araport11)
AT2G47530	-1.2952	0.0006494	AT2G47530	Pollen Ole e 1 allergen and extensin family protein;(source:Araport11)
AT2G47540	-0.678651	0.00150528	AT2G47540	Pollen Ole e 1 allergen and extensin family protein;(source:Araport11)
AT2G47800	-0.733288	0.0255135	ABCC4	multidrug resistance-associated protein 4;(source:Araport11)
AT2G47880	0.689051	0.0357872	AT2G47880	Glutaredoxin family protein;(source:Araport11)
AT2G48030	-0.744912	0.000518274	AT2G48030	DNAse I-like superfamily protein;(source:Araport11)
AT2G48080	-3.05549	1.27816e-18	AT2G48080	oxidoreductase, 2OG-Fe(II) oxygenase family protein;(source:Araport11)
AT2G48130	-0.956234	0.0164567	AT2G48130	Bifunctional inhibitor/lipid-transfer protein/seed storage 2S albumin superfamily protein;(source:Araport11)
AT3G01050	0.601443	0.00181413	MUB1	membrane-anchored ubiquitin-fold protein 1 precursor;(source:Araport11)
AT3G01130	0.584209	0.000128729	AT3G01130	ATP synthase E chain;(source:Araport11)
AT3G01190	-1.78803	3.18111e-11	AT3G01190	Peroxidase superfamily protein;(source:Araport11)
AT3G01260	-1.21658	0.000338963	AT3G01260	Galactose mutarotase-like superfamily protein;(source:Araport11)
AT3G01420	-1.05396	0.0472051	DOX1	Peroxidase superfamily protein;(source:Araport11)
AT3G01440	-0.574933	0.00235433	PnsL3	PsbQ-like 1;(source:Araport11)
AT3G01480	-0.547193	0.000375529	CYP38	cyclophilin 38;(source:Araport11)
AT3G01500	-0.892354	2.87483e-05	CA1	carbonic anhydrase 1;(source:Araport11)
AT3G01540	0.513032	0.000156822	DRH1	DEAD box RNA helicase 1;(source:Araport11)
AT3G01560	0.372161	0.0434216	AT3G01560	proline-rich receptor-like kinase, putative (DUF1421);(source:Araport11)
AT3G01670	-1.31824	8.23659e-08	SEOa	sieve element occlusion protein;(source:Araport11)
AT3G01680	-1.02949	0.000365539	SEOR1	sieve element occlusion amino-terminus protein;(source:Araport11)
AT3G01720	-0.671299	0.00102489	AT3G01720	peptidyl serine alpha-galactosyltransferase;(source:Araport11)
AT3G01790	0.430846	0.00539624	AT3G01790	Ribosomal protein L13 family protein;(source:Araport11)
AT3G01810	-0.458805	0.00886302	AT3G01810	EEIG1/EHBP1 protein amino-terminal domain protein;(source:Araport11)
AT3G01910	-0.443943	0.00527692	SOX	sulfite oxidase;(source:Araport11)
AT3G01930	-0.541866	0.013577	AT3G01930	Major facilitator superfamily protein;(source:Araport11)
AT3G01970	1.65541	6.38577e-06	WRKY45	WRKY DNA-binding protein 45;(source:Araport11)
AT3G02080	0.420655	0.0136025	AT3G02080	Ribosomal protein S19e family protein;(source:Araport11)
AT3G02090	-0.473656	0.0382964	MPPBETA	Insulinase (Peptidase family M16) protein;(source:Araport11)
AT3G02200	0.406235	0.00999728	AT3G02200	Proteasome component (PCI) domain protein;(source:Araport11)
AT3G02540	-0.622331	3.23094e-06	RAD23C	Rad23 UV excision repair protein family;(source:Araport11)
AT3G02550	2.18397	2.89149e-24	LBD41	LOB domain-containing protein 41;(source:Araport11)
AT3G02555	0.827352	0.000569917	AT3G02555	hypothetical protein;(source:Araport11)
AT3G02630	-0.46466	0.0226287	AT3G02630	Plant stearoyl-acyl-carrier-protein desaturase family protein;(source:Araport11)
AT3G02800	2.03449	4.58294e-17	PFA-DSP3	Tyrosine phosphatase family protein;(source:Araport11)
AT3G02840	3.04103	6.46433e-14	AT3G02840	ARM repeat superfamily protein;(source:Araport11)
AT3G03020	1.08563	0.00145934	AT3G03020	hypothetical protein;(source:Araport11)
AT3G03050	-0.641127	0.0011787	CSLD3	cellulose synthase-like D3;(source:Araport11)
AT3G03250	-0.48837	0.0210214	UGP1	UDP-GLUCOSE PYROPHOSPHORYLASE 1;(source:Araport11)
AT3G03270	1.00342	0.00596527	AT3G03270	Adenine nucleotide alpha hydrolases-like superfamily protein;(source:Araport11)
AT3G03340	0.351311	0.0386792	UNE6	LUC7 related protein;(source:Araport11)
AT3G03500	-1.3289	0.00287973	AT3G03500	TatD related DNase;(source:Araport11)
AT3G03520	-1.43267	1.57596e-10	NPC3	non-specific phospholipase C3;(source:Araport11)
AT3G03530	-1.26448	0.00552124	NPC4	non-specific phospholipase C4;(source:Araport11)
AT3G03670	2.37804	4.0194e-07	AT3G03670	Peroxidase superfamily protein;(source:Araport11)
AT3G03680	-0.562173	0.00952687	AT3G03680	C2 calcium/lipid-binding plant phosphoribosyltransferase family protein;(source:Araport11)
AT3G03700	-0.990545	0.00026769	AT3G03700	Plasma-membrane choline transporter family protein;(source:Araport11)
AT3G03910	1.17921	0.0145625	GDH3	glutamate dehydrogenase 3;(source:Araport11)
AT3G04010	-1.62965	1.38192e-09	AT3G04010	O-Glycosyl hydrolases family 17 protein;(source:Araport11)
AT3G04060	-1.1603	2.35351e-05	NAC046	NAC domain containing protein 46;(source:Araport11)
AT3G04070	-0.606281	0.00738536	NAC047	NAC domain containing protein 47;(source:Araport11)
AT3G04120	-0.729263	1.44388e-05	GAPC1	glyceraldehyde-3-phosphate dehydrogenase C subunit 1;(source:Araport11)
AT3G04220	2.06843	7.03259e-06	AT3G04220	Disease resistance protein (TIR-NBS-LRR class) family;(source:Araport11)
AT3G04300	1.61661	0.000281202	AT3G04300	RmlC-like cupins superfamily protein;(source:Araport11)
AT3G04400	0.506991	0.00173683	emb2171	Ribosomal protein L14p/L23e family protein;(source:Araport11)
AT3G04460	0.52103	0.00422562	PEX12	peroxin-12;(source:Araport11)
AT3G04550	-0.577432	0.0366392	AT3G04550	rubisco accumulation factor-like protein;(source:Araport11)
AT3G04600	0.311644	0.0443557	AT3G04600	Nucleotidylyl transferase superfamily protein;(source:Araport11)
AT3G04630	0.517257	0.000657218	WDL1	WVD2-like 1;(source:Araport11)
AT3G04790	-0.587654	0.00373261	EMB3119	Ribose 5-phosphate isomerase, type A protein;(source:Araport11)
AT3G04870	-0.538505	0.000520719	ZDS	zeta-carotene desaturase;(source:Araport11)
AT3G05165	-1.03967	1.57801e-11	AT3G05165	Major facilitator superfamily protein;(source:Araport11)
AT3G05270	-0.42928	0.042904	AT3G05270	filament-like protein (DUF869);(source:Araport11)
AT3G05290	0.466651	0.0255516	PNC1	peroxisomal adenine nucleotide carrier 1;(source:Araport11)
AT3G05380	0.445994	0.0452207	ALY2	ALWAYS EARLY 2;(source:Araport11)
AT3G05400	-1.10486	0.0012399	AT3G05400	Major facilitator superfamily protein;(source:Araport11)
AT3G05630	-0.701442	0.0211927	PLDP2	phospholipase D P2;(source:Araport11)
AT3G05760	0.521286	0.00130981	AT3G05760	C2H2 and C2HC zinc fingers superfamily protein;(source:Araport11)
AT3G05880	-0.909618	0.00136391	RCI2A	Low temperature and salt responsive protein family;(source:Araport11)
AT3G05890	-1.30667	5.45273e-10	RCI2B	Low temperature and salt responsive protein family;(source:Araport11)
AT3G05900	-1.12383	5.20051e-08	AT3G05900	neurofilament protein-like protein;(source:Araport11)
AT3G06145	0.739495	0.00983262	AT3G06145	RING zinc finger protein;(source:Araport11)
AT3G06390	-1.02537	0.0493577	AT3G06390	Uncharacterized protein family (UPF0497);(source:Araport11)
AT3G06435	1.3407	5.91812e-05	AT3G06435	Expressed protein;(source:Araport11)
AT3G06460	-1.99522	3.70123e-06	AT3G06460	GNS1/SUR4 membrane protein family;(source:Araport11)
AT3G06500	0.371217	0.0250389	A/N-InvC	Plant neutral invertase family protein;(source:Araport11)
AT3G06660	0.450888	0.0347496	AT3G06660	PAPA-1-like family protein / zinc finger (HIT type) family protein;(source:Araport11)
AT3G06720	-0.362542	0.0283857	IMPA-1	importin alpha isoform 1;(source:Araport11)
AT3G06830	1.48216	0.00239716	AT3G06830	Plant invertase/pectin methylesterase inhibitor superfamily;(source:Araport11)
AT3G06868	-0.661914	0.00806188	AT3G06868	vitellogenin-like protein;(source:Araport11)
AT3G07020	-0.373636	0.0247985	SGT	UDP-Glycosyltransferase superfamily protein;(source:Araport11)
AT3G07070	-1.17	0.000207078	AT3G07070	Protein kinase superfamily protein;(source:Araport11)
AT3G07090	-0.442427	0.00865358	AT3G07090	PPPDE putative thiol peptidase family protein;(source:Araport11)
AT3G07340	-0.780425	8.75259e-05	AT3G07340	basic helix-loop-helix (bHLH) DNA-binding superfamily protein;(source:Araport11)
AT3G07410	0.654612	0.000146401	RABA5b	RAB GTPase homolog A5B;(source:Araport11)
AT3G07570	-0.570204	0.00372406	AT3G07570	Cytochrome b561/ferric reductase transmembrane with DOMON related domain-containing protein;(source:Araport11)
AT3G07900	-1.35663	7.95994e-06	AT3G07900	O-fucosyltransferase family protein;(source:Araport11)
AT3G08510	-0.653065	0.000886887	PLC2	phospholipase C 2;(source:Araport11)
AT3G08520	0.985836	1.26459e-06	AT3G08520	Ribosomal protein L41 family;(source:Araport11)
AT3G08590	-0.369815	0.00197373	iPGAM2	Phosphoglycerate mutase, 2,3-bisphosphoglycerate-independent;(source:Araport11)
AT3G08610	0.312958	0.0431196	AT3G08610	NADH dehydrogenase ubiquinone 1 alpha subcomplex subunit;(source:Araport11)
AT3G08720	0.600875	0.0164907	S6K2	serine/threonine protein kinase 2;(source:Araport11)
AT3G08760	0.52491	0.000520057	ATSIK	Protein kinase superfamily protein;(source:Araport11)
AT3G08770	0.739669	0.00356742	LTP6	lipid transfer protein 6;(source:Araport11)
AT3G08850	-0.375714	0.0353233	RAPTOR1	Regulatory-associated protein of TOR 1;(source:Araport11)
AT3G08860	-2.81468	8.26885e-16	PYD4	PYRIMIDINE 4;(source:Araport11)
AT3G08880	0.603547	0.0101234	AT3G08880	plectin-like protein;(source:Araport11)
AT3G08930	-0.321041	0.0387277	AT3G08930	LMBR1-like membrane protein;(source:Araport11)
AT3G09220	-1.09043	2.74042e-06	LAC7	laccase 7;(source:Araport11)
AT3G09320	0.542114	0.0237789	AT3G09320	DHHC-type zinc finger family protein;(source:Araport11)
AT3G09405	3.49092	2.3069e-28	AT3G09405	Pectinacetylesterase family protein;(source:Araport11)
AT3G09440	-0.423492	0.0250273	AT3G09440	Heat shock protein 70 (Hsp 70) family protein;(source:Araport11)
AT3G09540	-0.53078	0.0282855	AT3G09540	Pectin lyase-like superfamily protein;(source:Araport11)
AT3G09580	-0.525853	0.0335791	AT3G09580	FAD/NAD(P)-binding oxidoreductase family protein;(source:Araport11)
AT3G09810	-0.54611	0.00153523	IDH-VI	isocitrate dehydrogenase VI;(source:Araport11)
AT3G09840	-0.497732	0.0155166	CDC48	cell division cycle 48;(source:Araport11)
AT3G09860	0.351041	0.0307305	AT3G09860	actin T1-like protein;(source:Araport11)
AT3G09925	-0.896001	0.0304205	AT3G09925	Pollen Ole e 1 allergen and extensin family protein;(source:Araport11)
AT3G10040	1.70914	1.12927e-15	AT3G10040	sequence-specific DNA binding transcription factor;(source:Araport11)
AT3G10300	-0.505863	0.00296562	AT3G10300	Calcium-binding EF-hand family protein;(source:Araport11)
AT3G10320	-1.67732	3.47388e-06	AT3G10320	Glycosyltransferase family 61 protein;(source:Araport11)
AT3G10360	-0.386519	0.0438504	PUM4	pumilio 4;(source:Araport11)
AT3G10410	-0.417627	0.0315291	SCPL49	SERINE CARBOXYPEPTIDASE-LIKE 49;(source:Araport11)
AT3G10420	-0.332362	0.0477873	SPD1	P-loop containing nucleoside triphosphate hydrolases superfamily protein;(source:Araport11)
AT3G10470	-1.04783	0.0152555	AT3G10470	C2H2-type zinc finger family protein;(source:Araport11)
AT3G10572	0.659767	0.00560082	APEM9	3-phosphoinositide-dependent protein kinase-1;(source:Araport11)
AT3G10710	-1.1808	0.00183252	RHS12	root hair specific 12;(source:Araport11)
AT3G10810	0.376132	0.0388173	AT3G10810	zinc finger (C3HC4-type RING finger) family protein;(source:Araport11)
AT3G10930	1.39375	0.0030938	AT3G10930	hypothetical protein;(source:Araport11)
AT3G11080	1.04957	0.00526454	RLP35	receptor like protein 35;(source:Araport11)
AT3G11130	-0.586582	0.0130705	AT3G11130	Clathrin, heavy chain;(source:Araport11)
AT3G11330	-0.674562	1.75452e-05	PIRL9	plant intracellular ras group-related LRR 9;(source:Araport11)
AT3G11340	-1.65732	4.27926e-09	UGT76B1	UDP-Glycosyltransferase superfamily protein;(source:Araport11)
AT3G11370	-1.60385	0.000246207	AT3G11370	Cysteine/Histidine-rich C1 domain family protein;(source:Araport11)
AT3G11385	-1.52901	8.68653e-05	AT3G11385	Cysteine/Histidine-rich C1 domain family protein;(source:Araport11)
AT3G11390	-1.35657	0.0016906	AT3G11390	Cysteine/Histidine-rich C1 domain family protein;(source:Araport11)
AT3G11430	-1.1006	0.0105773	GPAT5	glycerol-3-phosphate acyltransferase 5;(source:Araport11)
AT3G11450	0.385352	0.00191662	AT3G11450	DnaJ and Myb-like DNA-binding domain-containing protein;(source:Araport11)
AT3G11550	-1.01319	5.79462e-09	CASP2	Uncharacterized protein family (UPF0497);(source:Araport11)
AT3G11560	-0.424608	0.0259206	AT3G11560	LETM1-like protein;(source:Araport11)
AT3G11580	0.497126	0.0351041	AT3G11580	AP2/B3-like transcriptional factor family protein;(source:Araport11)
AT3G11690	-0.644232	0.0277682	AT3G11690	hypothetical protein;(source:Araport11)
AT3G11820	0.707898	0.00449099	SYP121	syntaxin of plants 121;(source:Araport11)
AT3G11840	1.29181	0.00209477	PUB24	E3 ubiquitin-protein ligase PUB24-like protein;(source:Araport11)
AT3G11945	-0.370007	0.0438272	HST	homogentisate prenyltransferase;(source:Araport11)
AT3G12020	-0.464513	0.00132334	AT3G12020	P-loop containing nucleoside triphosphate hydrolases superfamily protein;(source:Araport11)
AT3G12110	-0.701763	1.13266e-05	ACT11	actin-11;(source:Araport11)
AT3G12120	0.386872	0.00624616	FAD2	fatty acid desaturase 2;(source:Araport11)
AT3G12150	0.486343	0.0134289	AT3G12150	alpha/beta hydrolase family protein;(source:Araport11)
AT3G12230	-1.04901	0.0425444	scpl14	serine carboxypeptidase-like 14;(source:Araport11)
AT3G12240	-1.11752	0.043842	SCPL15	serine carboxypeptidase-like 15;(source:Araport11)
AT3G12500	-1.05347	0.0222164	HCHIB	basic chitinase;(source:Araport11)
AT3G12540	-1.35138	0.000735807	AT3G12540	ternary complex factor MIP1 leucine-zipper protein (Protein of unknown function, DUF547);(source:Araport11)
AT3G12580	-0.64836	0.0300059	HSP70	heat shock protein 70;(source:Araport11)
AT3G12600	0.630958	0.00126489	NUDT16	nudix hydrolase homolog 16;(source:Araport11)
AT3G12610	-0.663305	0.000518593	DRT100	Leucine-rich repeat (LRR) family protein;(source:Araport11)
AT3G12710	-0.667278	0.000413327	AT3G12710	DNA glycosylase superfamily protein;(source:Araport11)
AT3G12760	0.427455	0.00893511	AT3G12760	defective in cullin neddylation protein;(source:Araport11)
AT3G12780	-0.617508	1.91664e-05	PGK1	phosphoglycerate kinase 1;(source:Araport11)
AT3G12910	5.08834	1.28003e-43	AT3G12910	NAC (No Apical Meristem) domain transcriptional regulator superfamily protein;(source:Araport11)
AT3G13090	-1.31198	0.000113262	ABCC6	multidrug resistance-associated protein 8;(source:Araport11)
AT3G13290	-0.421826	0.0311704	VCR	varicose-like protein;(source:Araport11)
AT3G13310	0.693869	0.00954122	AT3G13310	Chaperone DnaJ-domain superfamily protein;(source:Araport11)
AT3G13320	-0.567288	0.0013398	CAX2	cation exchanger 2;(source:Araport11)
AT3G13433	1.46229	0.00289669	AT3G13433	transmembrane protein;(source:Araport11)
AT3G13440	0.495803	0.000953822	AT3G13440	S-adenosyl-L-methionine-dependent methyltransferases superfamily protein;(source:Araport11)
AT3G13570	0.361643	0.0172759	SCL30A	SC35-like splicing factor 30A;(source:Araport11)
AT3G13580	0.592572	0.00025327	AT3G13580	Ribosomal protein L30/L7 family protein;(source:Araport11)
AT3G13750	-0.848107	2.44252e-09	BGAL1	beta galactosidase 1;(source:Araport11)
AT3G13790	-0.414356	0.00151725	ATBFRUCT1	Glycosyl hydrolases family 32 protein;(source:Araport11)
AT3G13930	-0.38491	0.00319337	AT3G13930	Dihydrolipoamide acetyltransferase, long form protein;(source:Araport11)
AT3G14020	0.781803	0.0251285	NF-YA6	nuclear factor Y, subunit A6;(source:Araport11)
AT3G14067	-0.766092	0.00779745	AT3G14067	Subtilase family protein;(source:Araport11)
AT3G14172	-0.361026	0.0166125	AT3G14172	GPI-anchored adhesin-like protein;(source:Araport11)
AT3G14180	0.456515	0.00736722	ASIL2	sequence-specific DNA binding transcription factor;(source:Araport11)
AT3G14225	3.10367	9.74467e-28	GLIP4	GDSL-motif lipase 4;(source:Araport11)
AT3G14270	-0.665625	8.68111e-07	FAB1B	phosphatidylinositol-4-phosphate 5-kinase family protein;(source:Araport11)
AT3G14350	-0.558631	0.000183242	SRF7	STRUBBELIG-receptor family 7;(source:Araport11)
AT3G14362	0.815342	0.0311944	RTFL10	ROTUNDIFOLIA like 10;(source:Araport11)
AT3G14440	-1.42616	0.00151185	NCED3	nine-cis-epoxycarotenoid dioxygenase 3;(source:Araport11)
AT3G14560	-0.680529	0.0413508	AT3G14560	hypothetical protein;(source:Araport11)
AT3G14600	0.61813	0.000113966	AT3G14600	Ribosomal protein L18ae/LX family protein;(source:Araport11)
AT3G14620	1.35771	0.000956733	CYP72A8	cytochrome P450, family 72, subfamily A, polypeptide 8;(source:Araport11)
AT3G14680	-0.839449	0.0141204	CYP72A14	cytochrome P450, family 72, subfamily A, polypeptide 14;(source:Araport11)
AT3G14690	-0.544601	2.94479e-05	CYP72A15	cytochrome P450, family 72, subfamily A, polypeptide 15;(source:Araport11)
AT3G14710	1.37695	0.00902777	AT3G14710	RNI-like superfamily protein;(source:Araport11)
AT3G14810	-0.962394	0.0041147	MSL5	mechanosensitive channel of small conductance-like 5;(source:Araport11)
AT3G14920	-0.400918	0.0208199	AT3G14920	Peptide-N4-(N-acetyl-beta-glucosaminyl)asparagine amidase A protein;(source:Araport11)
AT3G14940	-1.99967	2.85187e-09	PPC3	phosphoenolpyruvate carboxylase 3;(source:Araport11)
AT3G15210	0.633833	0.0201498	ERF4	ethylene responsive element binding factor 4;(source:Araport11)
AT3G15356	2.10873	6.95184e-23	AT3G15356	Legume lectin family protein;(source:Araport11)
AT3G15518	2.75813	6.57948e-15	AT3G15518	hypothetical protein;(source:Araport11)
AT3G15530	0.585627	0.00157508	AT3G15530	S-adenosyl-L-methionine-dependent methyltransferases superfamily protein;(source:Araport11)
AT3G15690	-0.711264	0.000186012	AT3G15690	Single hybrid motif superfamily protein;(source:Araport11)
AT3G15720	0.820763	9.9823e-05	AT3G15720	Pectin lyase-like superfamily protein;(source:Araport11)
AT3G15890	-0.82526	0.0381812	AT3G15890	Protein kinase superfamily protein;(source:Araport11)
AT3G16030	0.795106	0.00808515	CES101	lectin protein kinase family protein;(source:Araport11)
AT3G16180	-0.934987	6.15241e-07	AT3G16180	Major facilitator superfamily protein;(source:Araport11)
AT3G16190	0.395909	0.0452066	AT3G16190	Isochorismatase family protein;(source:Araport11)
AT3G16210	-1.07364	0.0496304	AT3G16210	F-box family protein;(source:Araport11)
AT3G16240	-1.09406	0.000116721	DELTA-TIP	delta tonoplast integral protein;(source:Araport11)
AT3G16300	1.0809	0.011688	AT3G16300	Uncharacterized protein family (UPF0497);(source:Araport11)
AT3G16310	0.617587	0.000221912	AT3G16310	mitotic phosphoprotein N end (MPPN) family protein;(source:Araport11)
AT3G16340	-0.724302	0.000462222	ABCG29	pleiotropic drug resistance 1;(source:Araport11)
AT3G16370	-0.696616	8.94451e-05	AT3G16370	GDSL-like Lipase/Acylhydrolase superfamily protein;(source:Araport11)
AT3G16390	-1.36537	9.86719e-07	NSP3	nitrile specifier protein 3;(source:Araport11)
AT3G16410	-1.33452	0.00213613	NSP4	nitrile specifier protein 4;(source:Araport11)
AT3G16440	-2.59578	3.04764e-16	MLP-300B	myrosinase-binding protein-like protein-300B;(source:Araport11)
AT3G16450	-0.463316	0.0451355	JAL33	Mannose-binding lectin superfamily protein;(source:Araport11)
AT3G16460	-0.767771	0.00508407	JAL34	Mannose-binding lectin superfamily protein;(source:Araport11)
AT3G16470	-0.937536	4.53447e-05	JR1	Mannose-binding lectin superfamily protein;(source:Araport11)
AT3G16500	0.386688	0.0211435	PAP1	phytochrome-associated protein 1;(source:Araport11)
AT3G16530	5.3594	1.63498e-91	AT3G16530	Legume lectin family protein;(source:Araport11)
AT3G16640	0.631383	3.87725e-06	TCTP	translationally controlled tumor protein;(source:Araport11)
AT3G16750	0.671649	0.0297524	AT3G16750	hypothetical protein;(source:Araport11)
AT3G16870	0.631734	0.0106799	GATA17	GATA transcription factor 17;(source:Araport11)
AT3G16910	-0.638439	0.000768255	AAE7	acyl-activating enzyme 7;(source:Araport11)
AT3G16920	-0.760521	0.0261156	CTL2	chitinase-like protein;(source:Araport11)
AT3G16950	-0.894161	3.26408e-06	LPD1	lipoamide dehydrogenase 1;(source:Araport11)
AT3G17420	-0.798268	0.00024669	GPK1	glyoxysomal protein kinase 1;(source:Araport11)
AT3G17590	0.495336	0.0423718	BSH	transcription regulatory protein SNF5, putative (BSH);(source:Araport11)
AT3G17790	0.756677	0.0130317	PAP17	purple acid phosphatase 17;(source:Araport11)
AT3G17810	-0.570906	1.31749e-05	PYD1	pyrimidine 1;(source:Araport11)
AT3G18050	-0.470791	0.0130556	AT3G18050	GPI-anchored protein;(source:Araport11)
AT3G18060	-0.711848	5.33524e-05	AT3G18060	transducin family protein / WD-40 repeat family protein;(source:Araport11)
AT3G18160	0.44242	0.00516387	PEX3-1	peroxin 3-1;(source:Araport11)
AT3G18170	-1.31921	1.61247e-08	AT3G18170	Glycosyltransferase family 61 protein;(source:Araport11)
AT3G18200	-1.17336	2.59693e-10	UMAMIT4	nodulin MtN21 /EamA-like transporter family protein;(source:Araport11)
AT3G18250	2.50831	1.46109e-11	AT3G18250	Putative membrane lipoprotein;(source:Araport11)
AT3G18280	-0.586226	0.00323757	AT3G18280	Bifunctional inhibitor/lipid-transfer protein/seed storage 2S albumin superfamily protein;(source:Araport11)
AT3G18370	0.618956	2.04689e-05	ATSYTF	C2 domain-containing protein;(source:Araport11)
AT3G18450	-0.939577	0.033596	AT3G18450	PLAC8 family protein;(source:Araport11)
AT3G18550	1.72768	0.000404934	BRC1	TCP family transcription factor;(source:Araport11)
AT3G18690	0.949838	0.0030393	MKS1	MAP kinase substrate 1;(source:Araport11)
AT3G18740	0.587295	0.000194846	RLK902	Ribosomal protein L7Ae/L30e/S12e/Gadd45 family protein;(source:Araport11)
AT3G18780	-0.458619	4.96221e-05	ACT2	actin 2;(source:Araport11)
AT3G18800	0.644313	0.0145393	AT3G18800	transmembrane protein;(source:Araport11)
AT3G18830	0.639374	4.59214e-05	PMT5	polyol/monosaccharide transporter 5;(source:Araport11)
AT3G18890	-0.511206	0.000423264	Tic62	NAD(P)-binding Rossmann-fold superfamily protein;(source:Araport11)
AT3G18930	0.688022	0.010222	AT3G18930	RING/U-box superfamily protein;(source:Araport11)
AT3G19000	-0.60167	0.00692174	AT3G19000	2-oxoglutarate (2OG) and Fe(II)-dependent oxygenase superfamily protein;(source:Araport11)
AT3G19030	-1.10225	0.00140854	AT3G19030	transcription initiation factor TFIID subunit 1b-like protein;(source:Araport11)
AT3G19050	-0.772238	0.045371	POK2	phragmoplast orienting kinesin 2;(source:Araport11)
AT3G19130	0.626375	0.000208367	RBP47B	RNA-binding protein 47B;(source:Araport11)
AT3G19170	-0.543955	0.0303673	PREP1	presequence protease 1;(source:Araport11)
AT3G19260	0.493026	0.0198574	LOH2	LAG1 homologue 2;(source:Araport11)
AT3G19320	-1.795	0.000149147	AT3G19320	Leucine-rich repeat (LRR) family protein;(source:Araport11)
AT3G19340	-0.530744	0.0006494	AT3G19340	aminopeptidase (DUF3754);(source:Araport11)
AT3G19370	-1.01545	3.97424e-06	AT3G19370	filament-like protein (DUF869);(source:Araport11)
AT3G19390	-1.338	3.85022e-09	AT3G19390	Granulin repeat cysteine protease family protein;(source:Araport11)
AT3G19400	-0.64684	0.00603198	AT3G19400	Cysteine proteinases superfamily protein;(source:Araport11)
AT3G19430	-1.25762	0.000284846	AT3G19430	late embryogenesis abundant protein-related / LEA protein-like protein;(source:Araport11)
AT3G19450	-0.599703	0.000733181	ATCAD4	GroES-like zinc-binding alcohol dehydrogenase family protein;(source:Araport11)
AT3G19480	-0.667379	0.000768255	AT3G19480	D-3-phosphoglycerate dehydrogenase;(source:Araport11)
AT3G19560	1.28727	0.00883915	AT3G19560	F-box family protein;(source:Araport11)
AT3G19615	2.12141	7.00302e-06	AT3G19615	beta-1,4-xylosidase;(source:Araport11)
AT3G19660	1.10731	0.013129	AT3G19660	hypothetical protein;(source:Araport11)
AT3G19860	0.561106	0.0234355	bHLH121	basic helix-loop-helix (bHLH) DNA-binding superfamily protein;(source:Araport11)
AT3G20015	-0.816805	4.19635e-06	AT3G20015	Eukaryotic aspartyl protease family protein;(source:Araport11)
AT3G20100	-0.902999	1.67564e-07	CYP705A19	cytochrome P450, family 705, subfamily A, polypeptide 19;(source:Araport11)
AT3G20130	-0.688243	0.0102361	CYP705A22	cytochrome P450, family 705, subfamily A, polypeptide 22;(source:Araport11)
AT3G20160	-1.73827	0.000513072	AT3G20160	Terpenoid synthases superfamily protein;(source:Araport11)
AT3G20250	-0.760191	0.00014877	PUM5	pumilio 5;(source:Araport11)
AT3G20362	1.1638	0.0207399	AT3G20362	hypothetical protein;(source:Araport11)
AT3G20395	1.23963	0.00218041	AT3G20395	RING/U-box superfamily protein;(source:Araport11)
AT3G20430	0.765342	0.011027	AT3G20430	phosphorylated adapter RNA export-like protein;(source:Araport11)
AT3G20460	-1.11948	0.00763045	AT3G20460	Major facilitator superfamily protein;(source:Araport11)
AT3G21080	1.3633	0.00667296	AT3G21080	ABC transporter-like protein;(source:Araport11)
AT3G21090	0.659089	0.00120296	ABCG15	ABC-2 type transporter family protein;(source:Araport11)
AT3G21180	-1.3953	6.61955e-10	ACA9	autoinhibited Ca(2+)-ATPase 9;(source:Araport11)
AT3G21230	-0.612002	0.00841232	4CL5	4-coumarate:CoA ligase 5;(source:Araport11)
AT3G21240	-0.947646	0.000271985	4CL2	4-coumarate:CoA ligase 2;(source:Araport11)
AT3G21250	-0.527145	5.48214e-06	ABCC8	multidrug resistance-associated protein 6;(source:Araport11)
AT3G21305	1.71711	2.84149e-05	AT3G21305	hypothetical protein;(source:Araport11)
AT3G21340	-2.28797	1.18481e-15	AT3G21340	Leucine-rich repeat protein kinase family protein;(source:Araport11)
AT3G21351	1.06663	0.0187614	AT3G21351	transmembrane protein;(source:Araport11)
AT3G21352	1.12771	0.0320022	AT3G21352	transmembrane protein;(source:Araport11)
AT3G21510	-0.589144	0.00964175	AHP1	histidine-containing phosphotransmitter 1;(source:Araport11)
AT3G21520	3.13892	7.71937e-13	DMP1	transmembrane protein, putative (DUF679 domain membrane protein 1);(source:Araport11)
AT3G21550	-1.45783	0.000886887	DMP2	transmembrane protein, putative (DUF679 domain membrane protein 2);(source:Araport11)
AT3G21650	0.432596	0.0426909	AT3G21650	Protein phosphatase 2A regulatory B subunit family protein;(source:Araport11)
AT3G21670	-1.52113	7.08712e-05	AT3G21670	Major facilitator superfamily protein;(source:Araport11)
AT3G21720	0.631349	0.00259107	ICL	isocitrate lyase;(source:Araport11)
AT3G21770	-0.622759	0.00874217	AT3G21770	Peroxidase superfamily protein;(source:Araport11)
AT3G21780	1.34259	0.00176665	UGT71B6	UDP-glucosyl transferase 71B6;(source:Araport11)
AT3G21990	1.36874	0.00521508	AT3G21990	cysteine-rich repeat secretory-like protein (DUF26);(source:Araport11)
AT3G22050	2.10081	1.17814e-05	AT3G22050	cysteine-rich repeat secretory protein, putative (DUF26);(source:Araport11)
AT3G22060	0.898881	0.00223021	AT3G22060	Receptor-like protein kinase-related family protein;(source:Araport11)
AT3G22100	1.12828	0.0289238	AT3G22100	basic helix-loop-helix (bHLH) DNA-binding superfamily protein;(source:Araport11)
AT3G22120	0.818446	0.000430902	CWLP	cell wall-plasma membrane linker protein;(source:Araport11)
AT3G22200	-1.0602	2.52268e-11	POP2	Pyridoxal phosphate (PLP)-dependent transferases superfamily protein;(source:Araport11)
AT3G22290	0.510728	0.00310268	AT3G22290	Endoplasmic reticulum vesicle transporter protein;(source:Araport11)
AT3G22400	-0.952568	0.000129969	LOX5	PLAT/LH2 domain-containing lipoxygenase family protein;(source:Araport11)
AT3G22440	0.467146	0.0158792	AT3G22440	FRIGIDA-like protein;(source:Araport11)
AT3G22540	0.961001	0.000394003	AT3G22540	hypothetical protein (DUF1677);(source:Araport11)
AT3G22570	-1.61719	0.000138461	AT3G22570	Bifunctional inhibitor/lipid-transfer protein/seed storage 2S albumin superfamily protein;(source:Araport11)
AT3G22620	-0.823388	0.000247658	AT3G22620	Bifunctional inhibitor/lipid-transfer protein/seed storage 2S albumin superfamily protein;(source:Araport11)
AT3G22740	-1.19718	0.0289291	HMT3	homocysteine S-methyltransferase 3;(source:Araport11)
AT3G22830	-1.20172	0.0103488	HSFA6B	heat shock transcription factor A6B;(source:Araport11)
AT3G22850	-0.842882	0.000339563	AT3G22850	aluminum induced protein with YGL and LRDR motifs;(source:Araport11)
AT3G23000	0.500827	0.0217069	CIPK7	CBL-interacting protein kinase 7;(source:Araport11)
AT3G23090	-1.39767	1.22858e-08	AT3G23090	TPX2 (targeting protein for Xklp2) protein family;(source:Araport11)
AT3G23123	1.9918	3.54814e-05	AT3G23123	transmembrane protein;(source:Araport11)
AT3G23150	0.75552	5.48367e-05	ETR2	Signal transduction histidine kinase, hybrid-type, ethylene sensor;(source:Araport11)
AT3G23170	1.32857	5.06469e-07	AT3G23170	hypothetical protein;(source:Araport11)
AT3G23175	-1.07221	0.00927791	AT3G23175	HR-like lesion-inducing protein-like protein;(source:Araport11)
AT3G23180	-0.647898	0.00895806	AT3G23180	HR-like lesion-inducing protein-like protein;(source:Araport11)
AT3G23190	-1.48048	0.000707677	AT3G23190	HR-like lesion-inducing protein-like protein;(source:Araport11)
AT3G23230	3.52995	6.4583e-17	TDR1	Integrase-type DNA-binding superfamily protein;(source:Araport11)
AT3G23250	3.60915	4.28665e-22	MYB15	myb domain protein 15;(source:Araport11)
AT3G23400	-0.484179	0.0022504	FIB4	Plastid-lipid associated protein PAP / fibrillin family protein;(source:Araport11)
AT3G23430	-0.935933	0.000907497	PHO1	phosphate 1;(source:Araport11)
AT3G23550	2.17788	1.84065e-07	AT3G23550	MATE efflux family protein;(source:Araport11)
AT3G23570	1.48042	3.19604e-09	AT3G23570	alpha/beta-Hydrolases superfamily protein;(source:Araport11)
AT3G23630	-1.10151	0.047973	IPT7	isopentenyltransferase 7;(source:Araport11)
AT3G23640	-0.500476	0.00748905	HGL1	heteroglycan glucosidase 1;(source:Araport11)
AT3G23750	-0.403297	0.00397348	AT3G23750	Leucine-rich repeat protein kinase family protein;(source:Araport11)
AT3G23790	0.557509	0.0333561	AAE16	AMP-dependent synthetase and ligase family protein;(source:Araport11)
AT3G23800	0.504742	0.0436254	SBP3	selenium-binding protein 3;(source:Araport11)
AT3G23820	-0.336074	0.0031712	GAE6	UDP-D-glucuronate 4-epimerase 6;(source:Araport11)
AT3G23880	0.545873	0.000677915	AT3G23880	F-box and associated interaction domains-containing protein;(source:Araport11)
AT3G23890	-0.677961	0.0494886	TOPII	topoisomerase II;(source:Araport11)
AT3G23940	-0.425316	0.0315291	AT3G23940	dehydratase family;(source:Araport11)
AT3G24020	-1.59351	1.56655e-12	AT3G24020	Disease resistance-responsive (dirigent-like protein) family protein;(source:Araport11)
AT3G24160	-0.306042	0.0177316	PMP	putative type 1 membrane protein;(source:Araport11)
AT3G24170	-0.550733	0.00452283	GR1	glutathione-disulfide reductase;(source:Araport11)
AT3G24190	-0.500414	0.005425	AT3G24190	Protein kinase superfamily protein;(source:Araport11)
AT3G24300	-1.12871	0.000892564	AMT1;3	ammonium transporter 1;(source:Araport11)
AT3G24500	-1.27912	0.000108418	MBF1C	multiprotein bridging factor 1C;(source:Araport11)
AT3G24510	3.68896	2.27291e-18	AT3G24510	Defensin-like (DEFL) family protein;(source:Araport11)
AT3G24530	-0.599587	0.00946024	AT3G24530	AAA-type ATPase family protein / ankyrin repeat family protein;(source:Araport11)
AT3G24670	-0.389781	0.0413543	AT3G24670	Pectin lyase-like superfamily protein;(source:Araport11)
AT3G25110	-0.588936	0.0317995	FaTA	fatA acyl-ACP thioesterase;(source:Araport11)
AT3G25120	0.503567	0.0324743	AT3G25120	Mitochondrial import inner membrane translocase subunit Tim17/Tim22/Tim23 family protein;(source:Araport11)
AT3G25190	-1.53257	3.04156e-05	AT3G25190	Vacuolar iron transporter (VIT) family protein;(source:Araport11)
AT3G25220	0.41604	0.00567366	FKBP15-1	FK506-binding protein 15 kD-1;(source:Araport11)
AT3G25290	-1.08386	4.17967e-08	AT3G25290	Auxin-responsive family protein;(source:Araport11)
AT3G25690	-0.506828	0.000203352	CHUP1	Hydroxyproline-rich glycoprotein family protein;(source:Araport11)
AT3G25770	-0.511184	0.0419362	AOC2	allene oxide cyclase 2;(source:Araport11)
AT3G25820	-1.12537	0.0260465	TPS-CIN	terpene synthase-like sequence-1,8-cineole;(source:Araport11)
AT3G25860	-0.611681	2.66388e-05	LTA2	2-oxoacid dehydrogenases acyltransferase family protein;(source:Araport11)
AT3G25900	0.821013	0.000326524	HMT-1	Homocysteine S-methyltransferase family protein;(source:Araport11)
AT3G25910	0.487265	0.00197466	AT3G25910	MAP kinase kinase kinase, putative (DUF1644);(source:Araport11)
AT3G25930	-0.904184	0.00796545	AT3G25930	Adenine nucleotide alpha hydrolases-like superfamily protein;(source:Araport11)
AT3G26190	2.87926	2.398e-10	CYP71B21	cytochrome P450, family 71, subfamily B, polypeptide 21;(source:Araport11)
AT3G26200	6.05188	1.81732e-68	CYP71B22	cytochrome P450, family 71, subfamily B, polypeptide 22;(source:Araport11)
AT3G26230	2.98298	8.35705e-12	CYP71B24	cytochrome P450, family 71, subfamily B, polypeptide 24;(source:Araport11)
AT3G26290	-0.954922	0.00098738	CYP71B26	cytochrome P450, family 71, subfamily B, polypeptide 26;(source:Araport11)
AT3G26330	-0.637091	0.022771	CYP71B37	cytochrome P450, family 71, subfamily B, polypeptide 37;(source:Araport11)
AT3G26520	-0.732546	4.87404e-05	TIP2	tonoplast intrinsic protein 2;(source:Araport11)
AT3G26590	0.622578	0.00499448	AT3G26590	MATE efflux family protein;(source:Araport11)
AT3G26610	-1.06564	0.000964563	AT3G26610	Pectin lyase-like superfamily protein;(source:Araport11)
AT3G26650	-0.389887	0.00335228	GAPA	glyceraldehyde 3-phosphate dehydrogenase A subunit;(source:Araport11)
AT3G26720	-0.48776	0.00549054	AT3G26720	Glycosyl hydrolase family 38 protein;(source:Araport11)
AT3G26830	3.71942	9.72939e-61	PAD3	Cytochrome P450 superfamily protein;(source:Araport11)
AT3G26910	0.961916	0.000583222	AT3G26910	hydroxyproline-rich glycoprotein family protein;(source:Araport11)
AT3G26932	0.600962	0.00386893	DRB3	dsRNA-binding protein 3;(source:Araport11)
AT3G26980	0.897445	2.59497e-06	MUB4	membrane-anchored ubiquitin-fold protein 4 precursor;(source:Araport11)
AT3G26990	0.439895	0.0384045	AT3G26990	ENTH/VHS family protein;(source:Araport11)
AT3G27030	1.01404	9.20123e-07	AT3G27030	transmembrane protein;(source:Araport11)
AT3G27170	-1.11644	3.54814e-05	CLC-B	chloride channel B;(source:Araport11)
AT3G27190	-0.414372	0.00458905	UKL2	uridine kinase-like 2;(source:Araport11)
AT3G27220	1.54477	1.24282e-20	AT3G27220	Galactose oxidase/kelch repeat superfamily protein;(source:Araport11)
AT3G27510	-1.25863	0.0022504	AT3G27510	Cysteine/Histidine-rich C1 domain family protein;(source:Araport11)
AT3G27770	0.792959	0.0303299	AT3G27770	plant/protein;(source:Araport11)
AT3G27950	1.25546	2.06227e-06	AT3G27950	GDSL-like Lipase/Acylhydrolase superfamily protein;(source:Araport11)
AT3G27960	-0.584713	0.000387823	KLCR2	Tetratricopeptide repeat (TPR)-like superfamily protein;(source:Araport11)
AT3G28040	-0.562637	0.00355453	AT3G28040	Leucine-rich receptor-like protein kinase family protein;(source:Araport11)
AT3G28130	0.479211	0.0204181	UMAMIT44	nodulin MtN21 /EamA-like transporter family protein;(source:Araport11)
AT3G28180	-0.463796	0.000124324	CSLC04	Cellulose-synthase-like C4;(source:Araport11)
AT3G28290	-1.26045	0.00339994	AT14A	transmembrane protein, putative (DUF677);(source:Araport11)
AT3G28345	-1.31129	6.46389e-06	ABCB15	ABC transporter family protein;(source:Araport11)
AT3G28480	0.603387	0.0227896	AT3G28480	Oxoglutarate/iron-dependent oxygenase;(source:Araport11)
AT3G28510	-1.76024	0.000305297	AT3G28510	P-loop containing nucleoside triphosphate hydrolases superfamily protein;(source:Araport11)
AT3G28580	3.11575	8.27518e-23	AT3G28580	P-loop containing nucleoside triphosphate hydrolases superfamily protein;(source:Araport11)
AT3G28715	-0.412204	0.00313672	AT3G28715	ATPase, V0/A0 complex, subunit C/D;(source:Araport11)
AT3G28740	-1.62365	4.14085e-22	CYP81D11	Cytochrome P450 superfamily protein;(source:Araport11)
AT3G28860	-0.533694	0.00294015	ABCB19	ATP binding cassette subfamily B19;(source:Araport11)
AT3G28930	2.91158	5.86323e-57	AIG2	AIG2-like (avirulence induced gene) family protein;(source:Araport11)
AT3G28956	0.621032	0.0498037	AT3G28956	RNA polymerase II, Rpb4, core protein;(source:Araport11)
AT3G28970	0.592158	0.0340805	AAR3	defective in cullin neddylation protein (DUF298);(source:Araport11)
AT3G29000	1.5546	0.000833892	AT3G29000	Calcium-binding EF-hand family protein;(source:Araport11)
AT3G29035	-0.573521	0.0362723	NAC3	NAC domain containing protein 3;(source:Araport11)
AT3G29200	-0.379091	0.0432397	CM1	chorismate mutase 1;(source:Araport11)
AT3G29250	-1.69512	3.34211e-06	SDR4	NAD(P)-binding Rossmann-fold superfamily protein;(source:Araport11)
AT3G29360	-0.622898	0.00933066	UGD2	UDP-glucose 6-dehydrogenase family protein;(source:Araport11)
AT3G29680	-1.25649	0.0110202	AT3G29680	HXXXD-type acyl-transferase family protein;(source:Araport11)
AT3G29970	2.73768	2.48154e-09	AT3G29970	B12D protein;(source:Araport11)
AT3G30390	-0.694077	0.00144685	AT3G30390	Transmembrane amino acid transporter family protein;(source:Araport11)
AT3G32980	-0.750274	0.00408283	AT3G32980	Peroxidase superfamily protein;(source:Araport11)
AT3G43190	1.4427	1.66768e-07	SUS4	sucrose synthase 4;(source:Araport11)
AT3G43600	-0.51584	0.0179848	AAO2	aldehyde oxidase 2;(source:Araport11)
AT3G43670	-0.625972	0.00430929	AT3G43670	Copper amine oxidase family protein;(source:Araport11)
AT3G43800	-0.486192	0.00891203	GSTU27	glutathione S-transferase tau 27;(source:Araport11)
AT3G43960	-0.532825	0.0364781	AT3G43960	Cysteine proteinases superfamily protein;(source:Araport11)
AT3G44190	-1.16691	1.48479e-05	AT3G44190	FAD/NAD(P)-binding oxidoreductase family protein;(source:Araport11)
AT3G44200	-0.391168	0.00253141	NEK6	serine/threonine-protein kinase NEK5;(source:Araport11)
AT3G44300	-0.976314	0.0098317	NIT2	nitrilase 2;(source:Araport11)
AT3G44320	-1.10861	0.000366365	NIT3	nitrilase 3;(source:Araport11)
AT3G44326	-1.83996	9.77809e-05	AT3G44326	F-box family protein;(source:Araport11)
AT3G44430	0.399173	0.0123123	AT3G44430	transmembrane protein;(source:Araport11)
AT3G44550	-0.883747	0.0452207	FAR5	fatty acid reductase 5;(source:Araport11)
AT3G44670	0.36262	0.0329937	AT3G44670	Disease resistance protein (TIR-NBS-LRR class) family;(source:Araport11)
AT3G44710	-1.28377	0.0172107	AT3G44710	transmembrane protein, putative (DUF247);(source:Araport11)
AT3G44720	1.66422	4.92973e-12	ADT4	arogenate dehydratase 4;(source:Araport11)
AT3G44880	-0.472796	0.018653	ACD1	Pheophorbide a oxygenase family protein with Rieske 2Fe-2S domain-containing protein;(source:Araport11)
AT3G45010	-1.16586	0.00157485	scpl48	serine carboxypeptidase-like 48;(source:Araport11)
AT3G45040	0.589063	0.0216008	AT3G45040	phosphatidate cytidylyltransferase family protein;(source:Araport11)
AT3G45050	0.443645	0.0402153	AT3G45050	transmembrane protein;(source:Araport11)
AT3G45070	-1.70148	0.000704459	AT3G45070	P-loop containing nucleoside triphosphate hydrolases superfamily protein;(source:Araport11)
AT3G45080	-1.20422	0.0259614	AT3G45080	P-loop containing nucleoside triphosphate hydrolases superfamily protein;(source:Araport11)
AT3G45140	-1.99337	1.37157e-05	LOX2	lipoxygenase 2;(source:Araport11)
AT3G45530	-0.888065	0.0165667	AT3G45530	Cysteine/Histidine-rich C1 domain family protein;(source:Araport11)
AT3G45680	-1.16017	0.0256675	AT3G45680	Major facilitator superfamily protein;(source:Araport11)
AT3G45700	-1.32034	1.41619e-06	AT3G45700	Major facilitator superfamily protein;(source:Araport11)
AT3G45710	-1.68827	2.69931e-09	AT3G45710	Major facilitator superfamily protein;(source:Araport11)
AT3G45730	0.897481	0.0421241	AT3G45730	hypothetical protein;(source:Araport11)
AT3G45740	0.442197	0.0462224	AT3G45740	hydrolase family protein / HAD-superfamily protein;(source:Araport11)
AT3G45780	-0.891817	0.00144724	PHOT1	phototropin 1;(source:Araport11)
AT3G45970	-1.1125	0.000702157	EXLA1	expansin-like A1;(source:Araport11)
AT3G46290	-0.761769	1.1736e-05	HERK1	hercules receptor kinase 1;(source:Araport11)
AT3G46330	1.13651	0.0364698	MEE39	Leucine-rich repeat protein kinase family protein;(source:Araport11)
AT3G46400	-1.0979	0.0331858	AT3G46400	Leucine-rich repeat protein kinase family protein;(source:Araport11)
AT3G46430	0.54492	0.00053714	AT3G46430	ATP synthase;(source:Araport11)
AT3G46440	-0.343243	0.0186988	UXS5	UDP-XYL synthase 5;(source:Araport11)
AT3G46560	0.535107	0.0382537	TIM9	Tim10/DDP family zinc finger protein;(source:Araport11)
AT3G46660	0.845109	0.000627233	UGT76E12	UDP-glucosyl transferase 76E12;(source:Araport11)
AT3G46680	1.35081	0.009456	AT3G46680	UDP-Glycosyltransferase superfamily protein;(source:Araport11)
AT3G46700	-1.41965	0.000327327	AT3G46700	UDP-Glycosyltransferase superfamily protein;(source:Araport11)
AT3G46780	-0.513804	0.00689618	PTAC16	plastid transcriptionally active 16;(source:Araport11)
AT3G47030	1.13943	0.0402037	AT3G47030	F-box and associated interaction domains-containing protein;(source:Araport11)
AT3G47040	-1.47586	0.00434282	AT3G47040	Glycosyl hydrolase family protein;(source:Araport11)
AT3G47340	-1.49046	0.000267479	ASN1	glutamine-dependent asparagine synthase 1;(source:Araport11)
AT3G47400	-0.836331	0.0180935	AT3G47400	Plant invertase/pectin methylesterase inhibitor superfamily;(source:Araport11)
AT3G47430	0.596027	0.00339602	PEX11B	peroxin 11B;(source:Araport11)
AT3G47520	-0.522123	0.0090026	MDH	malate dehydrogenase;(source:Araport11)
AT3G47540	1.21549	2.11671e-07	AT3G47540	Chitinase family protein;(source:Araport11)
AT3G47720	1.51889	0.00323113	SRO4	similar to RCD one 4;(source:Araport11)
AT3G47780	-0.798804	0.00430551	ABCA7	ABC2 homolog 6;(source:Araport11)
AT3G47800	0.490569	2.01763e-05	AT3G47800	Galactose mutarotase-like superfamily protein;(source:Araport11)
AT3G47960	-0.603447	0.0331779	GTR1	Major facilitator superfamily protein;(source:Araport11)
AT3G47980	-1.58113	0.000101761	AT3G47980	Integral membrane HPP family protein;(source:Araport11)
AT3G48070	-0.577372	0.00853443	AT3G48070	RING/U-box superfamily protein;(source:Araport11)
AT3G48100	-1.12397	0.00442962	RR5	response regulator 5;(source:Araport11)
AT3G48270	1.179	0.0327279	CYP71A26	cytochrome P450, family 71, subfamily A, polypeptide 26;(source:Araport11)
AT3G48340	-1.06209	2.83055e-05	CEP2	Cysteine proteinases superfamily protein;(source:Araport11)
AT3G48350	-0.673341	0.00582994	CEP3	Cysteine proteinases superfamily protein;(source:Araport11)
AT3G48450	1.17737	0.032531	AT3G48450	RPM1-interacting protein 4 (RIN4) family protein;(source:Araport11)
AT3G48530	-0.52775	0.0137931	KING1	SNF1-related protein kinase regulatory subunit gamma 1;(source:Araport11)
AT3G48690	0.475019	0.00278955	CXE12	alpha/beta-Hydrolases superfamily protein;(source:Araport11)
AT3G48720	-0.596033	0.0236084	DCF	HXXXD-type acyl-transferase family protein;(source:Araport11)
AT3G48850	1.94776	4.0748e-06	PHT3;2	phosphate transporter 3;(source:Araport11)
AT3G48890	0.781366	3.69015e-10	MAPR3	membrane-associated progesterone binding protein 3;(source:Araport11)
AT3G48920	-1.02359	0.0354491	MYB45	myb domain protein 45;(source:Araport11)
AT3G48940	-1.13137	0.0233214	AT3G48940	Remorin family protein;(source:Araport11)
AT3G48990	-0.416528	0.0470138	AAE3	AMP-dependent synthetase and ligase family protein;(source:Araport11)
AT3G49110	6.68251	2.40996e-114	PRXCA	peroxidase CA;(source:Araport11)
AT3G49190	-1.7877	8.4137e-05	AT3G49190	O-acyltransferase (WSD1-like) family protein;(source:Araport11)
AT3G49220	-0.578648	0.00496195	AT3G49220	Plant invertase/pectin methylesterase inhibitor superfamily;(source:Araport11)
AT3G49290	0.628222	0.0236271	ABIL2	ABL interactor-like protein 2;(source:Araport11)
AT3G49350	-0.421699	0.0384045	AT3G49350	Ypt/Rab-GAP domain of gyp1p superfamily protein;(source:Araport11)
AT3G49430	0.37841	0.0160027	SR34a	SER/ARG-rich protein 34A;(source:Araport11)
AT3G49490	-0.445901	0.00326312	AT3G49490	hypothetical protein;(source:Araport11)
AT3G49580	-3.22754	1.66439e-18	LSU1	response to low sulfur 1;(source:Araport11)
AT3G49620	1.96993	3.56064e-05	DIN11	2-oxoglutarate (2OG) and Fe(II)-dependent oxygenase superfamily protein;(source:Araport11)
AT3G49640	0.701923	0.00114542	AT3G49640	Aldolase-type TIM barrel family protein;(source:Araport11)
AT3G49670	-0.408062	0.000766927	BAM2	Leucine-rich receptor-like protein kinase family protein;(source:Araport11)
AT3G49790	0.753214	0.000208367	AT3G49790	Carbohydrate-binding protein;(source:Araport11)
AT3G49810	0.41161	0.0381812	AT3G49810	ARM repeat superfamily protein;(source:Araport11)
AT3G49845	-0.804567	0.0107945	WIH3	cysteine-rich TM module stress tolerance protein;(source:Araport11)
AT3G49930	-1.07325	0.000408524	AT3G49930	C2H2 and C2HC zinc fingers superfamily protein;(source:Araport11)
AT3G49940	-0.83296	0.00249112	LBD38	LOB domain-containing protein 38;(source:Araport11)
AT3G49960	-1.20686	0.000831569	AT3G49960	Peroxidase superfamily protein;(source:Araport11)
AT3G50120	-1.39135	0.000290101	AT3G50120	transmembrane protein, putative (DUF247);(source:Araport11)
AT3G50130	-1.01719	0.0012655	AT3G50130	transmembrane protein, putative (DUF247);(source:Araport11)
AT3G50300	-1.67629	1.48479e-05	AT3G50300	HXXXD-type acyl-transferase family protein;(source:Araport11)
AT3G50530	-0.47952	0.00132718	CRK	CDPK-related kinase;(source:Araport11)
AT3G50590	-0.477468	0.0126543	AT3G50590	Transducin/WD40 repeat-like superfamily protein;(source:Araport11)
AT3G50640	-0.780237	0.0025303	AT3G50640	hypothetical protein;(source:Araport11)
AT3G50820	-0.786378	2.40712e-08	PSBO2	photosystem II subunit O-2;(source:Araport11)
AT3G50970	-1.795	2.21088e-42	LTI30	dehydrin family protein;(source:Araport11)
AT3G51160	-0.765832	0.00349561	MUR1	NAD(P)-binding Rossmann-fold superfamily protein;(source:Araport11)
AT3G51250	-0.463762	0.00743702	AT3G51250	Senescence/dehydration-associated protein-like protein;(source:Araport11)
AT3G51340	0.881447	0.0107175	AT3G51340	Eukaryotic aspartyl protease family protein;(source:Araport11)
AT3G51410	1.01117	0.00789829	AT3G51410	hypothetical protein (DUF241);(source:Araport11)
AT3G51450	0.816221	0.0294329	AT3G51450	Calcium-dependent phosphotriesterase superfamily protein;(source:Araport11)
AT3G51460	-0.663219	6.37767e-06	RHD4	Phosphoinositide phosphatase family protein;(source:Araport11)
AT3G51550	-0.554357	0.00247026	FER	Malectin/receptor-like protein kinase family protein;(source:Araport11)
AT3G52040	0.48881	0.0419637	AT3G52040	2,3-bisphosphoglycerate-dependent phosphoglycerate mutase;(source:Araport11)
AT3G52200	-0.294025	0.034746	LTA3	Dihydrolipoamide acetyltransferase, long form protein;(source:Araport11)
AT3G52260	0.742541	0.00436932	AT3G52260	Pseudouridine synthase family protein;(source:Araport11)
AT3G52370	-0.975285	7.81822e-11	FLA15	FASCICLIN-like arabinogalactan protein 15 precursor;(source:Araport11)
AT3G52450	0.760633	0.00478412	PUB22	plant U-box 22;(source:Araport11)
AT3G52520	1.35513	9.04594e-05	AT3G52520	hypothetical protein;(source:Araport11)
AT3G52780	-1.7941	5.97465e-05	PAP20	Purple acid phosphatases superfamily protein;(source:Araport11)
AT3G52840	-0.683766	0.0026863	BGAL2	beta-galactosidase 2;(source:Araport11)
AT3G52930	-0.721906	0.000264836	FBA8	Aldolase superfamily protein;(source:Araport11)
AT3G53160	1.62866	3.60169e-07	UGT73C7	UDP-glucosyl transferase 73C7;(source:Araport11)
AT3G53210	0.806314	0.00966028	UMAMIT6	nodulin MtN21 /EamA-like transporter family protein;(source:Araport11)
AT3G53420	-0.738321	0.000985288	PIP2A	plasma membrane intrinsic protein 2A;(source:Araport11)
AT3G53480	-1.21275	1.06942e-10	ABCG37	pleiotropic drug resistance 9;(source:Araport11)
AT3G53500	0.44637	0.000434449	RS2Z32	RNA-binding (RRM/RBD/RNP motifs) family protein with retrovirus zinc finger-like domain-containing protein;(source:Araport11)
AT3G53520	-0.524352	0.011027	UXS1	UDP-glucuronic acid decarboxylase 1;(source:Araport11)
AT3G53590	1.51563	0.00296562	AT3G53590	LRR receptor-like Serine/Threonine-kinase;(source:Araport11)
AT3G53630	0.494398	0.0116131	AT3G53630	hypothetical protein;(source:Araport11)
AT3G53670	0.657748	6.15075e-06	AT3G53670	hypothetical protein;(source:Araport11)
AT3G53740	0.480717	0.0247981	AT3G53740	Ribosomal protein L36e family protein;(source:Araport11)
AT3G53800	0.485202	0.0291518	Fes1B	Fes1B;(source:Araport11)
AT3G53980	-2.07974	9.03586e-09	AT3G53980	Bifunctional inhibitor/lipid-transfer protein/seed storage 2S albumin superfamily protein;(source:Araport11)
AT3G54050	-0.606045	0.00125024	HCEF1	high cyclic electron flow 1;(source:Araport11)
AT3G54110	0.523146	0.011688	PUMP1	plant uncoupling mitochondrial protein 1;(source:Araport11)
AT3G54140	-0.959176	4.4823e-08	PTR1	peptide transporter 1;(source:Araport11)
AT3G54150	3.69683	1.53631e-48	AT3G54150	S-adenosyl-L-methionine-dependent methyltransferases superfamily protein;(source:Araport11)
AT3G54380	0.468743	0.041256	SAC3C	SAC3/GANP/Nin1/mts3/eIF-3 p25 family;(source:Araport11)
AT3G54400	-0.541655	0.00728818	AT3G54400	Eukaryotic aspartyl protease family protein;(source:Araport11)
AT3G54460	-0.413745	0.0185464	AT3G54460	SNF2 domain-containing protein / helicase domain-containing protein / F-box family protein;(source:Araport11)
AT3G54580	-1.04768	0.00266167	AT3G54580	Proline-rich extensin-like family protein;(source:Araport11)
AT3G54590	-0.977617	0.00339652	HRGP1	hydroxyproline-rich glycoprotein;(source:Araport11)
AT3G54640	1.65647	1.16597e-38	TSA1	tryptophan synthase alpha chain;(source:Araport11)
AT3G54740	0.522921	0.0323473	AT3G54740	zein-binding protein (Protein of unknown function, DUF593);(source:Araport11)
AT3G54770	-0.679734	0.000227744	ARP1	RNA-binding (RRM/RBD/RNP motifs) family protein;(source:Araport11)
AT3G54870	-0.895678	0.0189493	MRH2	Armadillo/beta-catenin repeat family protein / kinesin motor family protein;(source:Araport11)
AT3G54890	-0.417413	0.0322472	LHCA1	chlorophyll a-b binding protein 6;(source:Araport11)
AT3G55130	-0.811385	0.000250624	ABCG19	white-brown complex homolog 19;(source:Araport11)
AT3G55170	0.54934	0.00805627	AT3G55170	Ribosomal L29 family protein;(source:Araport11)
AT3G55230	-1.67096	1.94601e-12	AT3G55230	Disease resistance-responsive (dirigent-like protein) family protein;(source:Araport11)
AT3G55360	-0.389919	0.0121914	CER10	3-oxo-5-alpha-steroid 4-dehydrogenase family protein;(source:Araport11)
AT3G55430	-0.35873	0.0472589	AT3G55430	O-Glycosyl hydrolases family 17 protein;(source:Araport11)
AT3G55440	-0.470319	0.00131405	TPI	triosephosphate isomerase;(source:Araport11)
AT3G55470	0.918919	0.00995428	AT3G55470	Calcium-dependent lipid-binding (CaLB domain) family protein;(source:Araport11)
AT3G55500	-0.927982	0.043161	EXPA16	expansin A16;(source:Araport11)
AT3G55560	0.521174	0.000366037	AGF2	AT-hook protein of GA feedback 2;(source:Araport11)
AT3G55800	-0.637621	3.54856e-07	SBPASE	sedoheptulose-bisphosphatase;(source:Araport11)
AT3G55970	1.17455	0.00324991	JRG21	jasmonate-regulated gene 21;(source:Araport11)
AT3G55980	1.24495	6.79032e-05	SZF1	salt-inducible zinc finger 1;(source:Araport11)
AT3G55990	-0.90343	0.000101749	ESK1	trichome birefringence-like protein (DUF828);(source:Araport11)
AT3G56130	-0.417366	0.00954168	AT3G56130	biotin/lipoyl attachment domain-containing protein;(source:Araport11)
AT3G56200	-1.47936	1.84523e-09	AT3G56200	Transmembrane amino acid transporter family protein;(source:Araport11)
AT3G56230	-1.22501	0.00100862	AT3G56230	BTB/POZ domain-containing protein;(source:Araport11)
AT3G56240	-0.719133	0.00238082	CCH	copper chaperone;(source:Araport11)
AT3G56340	0.55193	0.00175236	AT3G56340	Ribosomal protein S26e family protein;(source:Araport11)
AT3G56400	-1.27534	0.00926225	WRKY70	WRKY DNA-binding protein 70;(source:Araport11)
AT3G56500	1.07619	0.0405421	AT3G56500	serine-rich protein-like protein;(source:Araport11)
AT3G56680	0.605757	9.10202e-05	AT3G56680	Single-stranded nucleic acid binding R3H protein;(source:Araport11)
AT3G56760	-0.406306	0.042435	AT3G56760	Protein kinase superfamily protein;(source:Araport11)
AT3G56940	-0.492536	0.00349823	CRD1	dicarboxylate diiron protein, putative (Crd1);(source:Araport11)
AT3G56970	-1.22814	0.023496	bHLH38	basic helix-loop-helix (bHLH) DNA-binding superfamily protein;(source:Araport11)
AT3G57020	-0.842571	0.00148958	AT3G57020	Calcium-dependent phosphotriesterase superfamily protein;(source:Araport11)
AT3G57070	-0.529391	0.00123307	AT3G57070	Glutaredoxin family protein;(source:Araport11)
AT3G57410	-0.398281	0.00296456	VLN3	villin 3;(source:Araport11)
AT3G57420	-0.69192	0.0237789	AT3G57420	transmembrane protein, putative (DUF288);(source:Araport11)
AT3G57510	-1.24567	0.0171495	ADPG1	Pectin lyase-like superfamily protein;(source:Araport11)
AT3G57550	0.443722	0.000825704	AGK2	guanylate kinase;(source:Araport11)
AT3G57670	0.640075	0.043576	NTT	C2H2-type zinc finger family protein;(source:Araport11)
AT3G58020	0.602968	0.046201	AT3G58020	Chaperone DnaJ-domain superfamily protein;(source:Araport11)
AT3G58300	1.00544	0.0407873	AT3G58300	phospholipase-like protein (PEARLI 4) family protein;(source:Araport11)
AT3G58670	0.570483	0.0010117	AT3G58670	2-aminoethanethiol dioxygenase, putative (DUF1637);(source:Araport11)
AT3G58730	-0.578578	0.000445144	AT3G58730	vacuolar ATP synthase subunit D (VATD) / V-ATPase D subunit / vacuolar proton pump D subunit (VATPD);(source:Araport11)
AT3G58760	-0.411588	0.0498154	AT3G58760	Integrin-linked protein kinase family;(source:Araport11)
AT3G59080	1.33308	2.14659e-06	AT3G59080	Eukaryotic aspartyl protease family protein;(source:Araport11)
AT3G59110	-0.408624	0.0443664	AT3G59110	Protein kinase superfamily protein;(source:Araport11)
AT3G59140	-0.942714	0.000216733	ABCC10	multidrug resistance-associated protein 14;(source:Araport11)
AT3G59220	-1.11336	5.84568e-06	PRN	pirin;(source:Araport11)
AT3G59300	-0.456144	0.0287008	AT3G59300	Pentatricopeptide repeat (PPR) superfamily protein;(source:Araport11)
AT3G59370	-0.940885	7.21482e-06	AT3G59370	Vacuolar calcium-binding protein-like protein;(source:Araport11)
AT3G59660	0.731838	0.0219455	AT3G59660	C2 domain-containing protein / GRAM domain-containing protein;(source:Araport11)
AT3G59750	1.19123	0.00146615	AT3G59750	Concanavalin A-like lectin protein kinase family protein;(source:Araport11)
AT3G59920	-0.426321	0.00229504	GDI2	RAB GDP dissociation inhibitor 2;(source:Araport11)
AT3G60120	6.40584	4.46752e-84	BGLU27	beta glucosidase 27;(source:Araport11)
AT3G60180	0.774302	0.00957519	AT3G60180	P-loop containing nucleoside triphosphate hydrolases superfamily protein;(source:Araport11)
AT3G60240	-0.849381	0.0131735	EIF4G
AT3G60250	0.409195	0.0489674	CKB3	casein kinase II beta chain 3;(source:Araport11)
AT3G60270	4.19201	4.23371e-32	AT3G60270	Cupredoxin superfamily protein;(source:Araport11)
AT3G60290	0.510266	0.0363693	AT3G60290	2-oxoglutarate (2OG) and Fe(II)-dependent oxygenase superfamily protein;(source:Araport11)
AT3G60300	0.716833	0.00147618	AT3G60300	RWD domain-containing protein;(source:Araport11)
AT3G60330	-1.33496	0.000146835	HA7	H[+]-ATPase 7;(source:Araport11)
AT3G60360	0.438879	0.0119267	EDA14	embryo sac development arrest 14;(source:Araport11)
AT3G60450	-0.810195	0.00125024	AT3G60450	Phosphoglycerate mutase family protein;(source:Araport11)
AT3G60520	0.909787	0.0368134	AT3G60520	zinc ion-binding protein;(source:Araport11)
[truncated: 1,412 more rows]

## Sheet: 6DAS
6 days after sowing (DAS)
geneID	log2(FC)	P-adj	Gene Symbol	TAIR Description
AT1G01050	-0.596083	0.00162631	PPa1	pyrophosphorylase 1;(source:Araport11)
AT1G01080	-0.705524	0.00111095	AT1G01080	RNA-binding (RRM/RBD/RNP motifs) family protein;(source:Araport11)
AT1G01090	-0.593237	0.00177287	PDH-E1 ALPHA	pyruvate dehydrogenase E1 alpha;(source:Araport11)
AT1G01120	1.13641	8.62278e-07	KCS1	3-ketoacyl-CoA synthase 1;(source:Araport11)
AT1G01140	0.937353	5.08426e-07	CIPK9	CBL-interacting protein kinase 9;(source:Araport11)
AT1G01200	-1.39811	0.0401629	RABA3	RAB GTPase homolog A3;(source:Araport11)
AT1G01260	1.13684	1.57541e-05	AT1G01260	basic helix-loop-helix (bHLH) DNA-binding superfamily protein;(source:Araport11)
AT1G01300	-0.761123	0.00493995	AT1G01300	Eukaryotic aspartyl protease family protein;(source:Araport11)
AT1G01320	-0.947559	1.57855e-11	AT1G01320	Tetratricopeptide repeat (TPR)-like superfamily protein;(source:Araport11)
AT1G01340	1.76423	1.2934e-11	CNGC10	cyclic nucleotide gated channel 10;(source:Araport11)
AT1G01390	1.15781	7.513e-07	AT1G01390	UDP-Glycosyltransferase superfamily protein;(source:Araport11)
AT1G01430	-0.440914	0.0460832	TBL25	TRICHOME BIREFRINGENCE-LIKE 25;(source:Araport11)
AT1G01453	-2.60162	0.00117896	AT1G01453	late embryogenesis abundant hydroxyproline-rich glycoprotein family protein;(source:Araport11)
AT1G01470	1.45127	0.000150261	LEA14	Late embryogenesis abundant protein;(source:Araport11)
AT1G01480	5.8435	6.46936e-69	ACS2	1-amino-cyclopropane-1-carboxylate synthase 2;(source:Araport11)
AT1G01490	0.808144	0.000254596	AT1G01490	Heavy metal transport/detoxification superfamily protein;(source:Araport11)
AT1G01520	-2.20273	0.0168253	ASG4	Homeodomain-like superfamily protein;(source:Araport11)
AT1G01540	-0.67294	0.000147162	AT1G01540	Protein kinase superfamily protein;(source:Araport11)
AT1G01550	1.03837	1.16038e-05	BPS1	BPS1-like protein (DUF793);(source:Araport11)
AT1G01560	4.97418	4.07672e-41	MPK11	MAP kinase 11;(source:Araport11)
AT1G01590	-2.5506	0.0159134	FRO1	ferric reduction oxidase 1;(source:Araport11)
AT1G01610	-0.997415	1.92704e-08	GPAT4	glycerol-3-phosphate acyltransferase 4;(source:Araport11)
AT1G01620	-0.798515	0.000109565	PIP1C	plasma membrane intrinsic protein 1C;(source:Araport11)
AT1G01630	-0.646525	0.00293025	AT1G01630	Sec14p-like phosphatidylinositol transfer family protein;(source:Araport11)
AT1G01660	-2.64817	0.000276779	AT1G01660	RING/U-box superfamily protein;(source:Araport11)
AT1G01680	2.96153	0.000889645	PUB54	plant U-box 54;(source:Araport11)
AT1G01710	0.460688	0.0387254	AT1G01710	acyl-CoA thioesterase II;(source:Araport11)
AT1G01720	0.928139	0.00412667	ATAF1	NAC (No Apical Meristem) domain transcriptional regulator superfamily protein;(source:Araport11)
AT1G01730	0.663228	0.000176858	AT1G01730	hypothetical protein;(source:Araport11)
AT1G01740	0.960818	0.0343092	BSK4	kinase with tetratricopeptide repeat domain-containing protein;(source:Araport11)
AT1G01750	-2.91059	1.40428e-11	ADF11	actin depolymerizing factor 11;(source:Araport11)
AT1G01780	-0.552836	0.0148382	PLIM2b	GATA type zinc finger transcription factor family protein;(source:Araport11)
AT1G01790	-1.08709	1.2492e-05	KEA1	K+ efflux antiporter 1;(source:Araport11)
AT1G01800	0.643525	0.000175375	AT1G01800	NAD(P)-binding Rossmann-fold superfamily protein;(source:Araport11)
AT1G01820	0.643586	6.13978e-05	PEX11C	peroxin 11c;(source:Araport11)
AT1G01910	0.589945	0.0058474	AT1G01910	P-loop containing nucleoside triphosphate hydrolases superfamily protein;(source:Araport11)
AT1G01970	-0.845528	4.2654e-05	AT1G01970	Tetratricopeptide repeat (TPR)-like superfamily protein;(source:Araport11)
AT1G02050	-0.948477	0.0419625	LAP6	Chalcone and stilbene synthase family protein;(source:Araport11)
AT1G02110	-0.786095	0.0436287	AT1G02110	bZIP domain class transcription factor (DUF630 and DUF632);(source:Araport11)
AT1G02150	-0.620269	0.0186715	AT1G02150	Tetratricopeptide repeat (TPR)-like superfamily protein;(source:Araport11)
AT1G02170	1.62358	5.58991e-35	MC1	metacaspase 1;(source:Araport11)
AT1G02190	-2.84393	0.00993429	AT1G02190	Fatty acid hydroxylase superfamily;(source:Araport11)
AT1G02220	2.37732	1.49651e-10	NAC003	NAC domain containing protein 3;(source:Araport11)
AT1G02230	1.16793	0.0240723	NAC004	NAC domain containing protein 4;(source:Araport11)
AT1G02280	-1.27183	0.000284631	TOC33	translocon at the outer envelope membrane of chloroplasts 33;(source:Araport11)
AT1G02300	-1.21184	0.0079733	AT1G02300	Cysteine proteinases superfamily protein;(source:Araport11)
AT1G02310	2.76234	4.14609e-09	MAN1	Glycosyl hydrolase superfamily protein;(source:Araport11)
AT1G02360	2.00669	6.12736e-05	AT1G02360	Chitinase family protein;(source:Araport11)
AT1G02390	1.71384	8.5692e-07	GPAT2	glycerol-3-phosphate acyltransferase 2;(source:Araport11)
AT1G02400	2.52952	2.77872e-12	GA2OX6	gibberellin 2-oxidase 6;(source:Araport11)
AT1G02405	1.83715	0.00686139	AT1G02405	proline-rich family protein;(source:Araport11)
AT1G02410	0.884454	0.000137766	AT1G02410	cytochrome c oxidase assembly protein CtaG / Cox11 family;(source:Araport11)
AT1G02460	1.99156	6.87906e-05	AT1G02460	Pectin lyase-like superfamily protein;(source:Araport11)
AT1G02470	3.42345	1.29895e-10	AT1G02470	Polyketide cyclase/dehydrase and lipid transport superfamily protein;(source:Araport11)
AT1G02500	0.503176	0.0245192	SAM1	S-adenosylmethionine synthetase 1;(source:Araport11)
AT1G02520	1.30384	0.00542234	ABCB11	P-glycoprotein 11;(source:Araport11)
AT1G02575	-2.67755	0.0165681	AT1G02575	transmembrane protein;(source:Araport11)
AT1G02580	2.19803	0.00834995	MEA	SET domain-containing protein;(source:Araport11)
AT1G02640	-0.708207	3.35563e-06	BXL2	beta-xylosidase 2;(source:Araport11)
AT1G02650	-1.00341	0.0432815	AT1G02650	Tetratricopeptide repeat (TPR)-like superfamily protein;(source:Araport11)
AT1G02670	1.18812	0.0317625	AT1G02670	P-loop containing nucleoside triphosphate hydrolases superfamily protein;(source:Araport11)
AT1G02720	-0.885807	0.00584284	GATL5	galacturonosyltransferase 5;(source:Araport11)
AT1G02750	0.654454	0.00641446	AT1G02750	Drought-responsive family protein;(source:Araport11)
AT1G02820	-2.18874	0.0363169	LEA3	Late embryogenesis abundant 3 (LEA3) family protein;(source:Araport11)
AT1G02840	-0.388469	0.0436287	SR34	RNA-binding (RRM/RBD/RNP motifs) family protein;(source:Araport11)
AT1G02850	0.944941	0.00433219	BGLU11	beta glucosidase 11;(source:Araport11)
AT1G02870	-0.603636	0.0234988	AT1G02870	nucleolar-like protein;(source:Araport11)
AT1G02890	0.6317	0.00958521	AT1G02890	AAA-type ATPase family protein;(source:Araport11)
AT1G02910	-0.624588	0.00784338	LPA1	tetratricopeptide repeat (TPR)-containing protein;(source:Araport11)
AT1G02920	6.71063	8.26482e-139	GSTF7	glutathione S-transferase 7;(source:Araport11)
AT1G02930	6.41438	0	GSTF6	glutathione S-transferase 6;(source:Araport11)
AT1G02940	2.68635	2.25641e-09	GSTF5	glutathione S-transferase (class phi) 5;(source:Araport11)
AT1G02990	0.461918	0.0359339	AT1G02990	hypothetical protein;(source:Araport11)
AT1G03060	0.539418	0.000328243	SPI	BEACH-DOMAIN HOMOLOG A1;(source:Araport11)
AT1G03120	-2.61443	0.00117465	RAB28	responsive to abscisic acid 28;(source:Araport11)
AT1G03130	-0.760801	0.00192264	PSAD-2	photosystem I subunit D-2;(source:Araport11)
AT1G03140	0.464923	0.0114682	AT1G03140	splicing factor Prp18 family protein;(source:Araport11)
AT1G03220	3.32642	2.65796e-46	AT1G03220	Eukaryotic aspartyl protease family protein;(source:Araport11)
AT1G03230	0.731786	0.028731	AT1G03230	Eukaryotic aspartyl protease family protein;(source:Araport11)
AT1G03250	0.416559	0.0386915	AT1G03250	R3H domain protein;(source:Araport11)
AT1G03290	0.856393	0.00220282	AT1G03290	ELKS/Rab6-interacting/CAST family protein;(source:Araport11)
AT1G03310	-1.06787	1.19289e-05	DBE1	debranching enzyme 1;(source:Araport11)
AT1G03370	1.53463	4.99143e-14	AT1G03370	C2 calcium/lipid-binding and GRAM domain containing protein;(source:Araport11)
AT1G03380	0.737747	1.47737e-05	ATG18G	yeast autophagy 18 G-like protein;(source:Araport11)
AT1G03457	-0.685985	0.025929	AT1G03457	RNA-binding (RRM/RBD/RNP motifs) family protein;(source:Araport11)
AT1G03495	1.30758	0.0301868	AT1G03495	HXXXD-type acyl-transferase family protein;(source:Araport11)
AT1G03530	-0.70615	0.00984309	NAF1	nuclear assembly factor 1;(source:Araport11)
AT1G03600	-1.25863	8.87607e-10	PSB27	photosystem II family protein;(source:Araport11)
AT1G03610	0.453905	0.0445834	AT1G03610	plant/protein (DUF789);(source:Araport11)
AT1G03630	-1.15421	8.84095e-11	POR C	protochlorophyllide oxidoreductase C;(source:Araport11)
AT1G03680	-1.09601	8.72267e-08	THM1	thioredoxin M-type 1;(source:Araport11)
AT1G03687	-0.674981	0.00958909	AT1G03687	DTW domain-containing protein;(source:Araport11)
AT1G03700	-1.65047	0.0387673	AT1G03700	Uncharacterized protein family (UPF0497);(source:Araport11)
AT1G03740	1.54442	3.16971e-12	AT1G03740	Protein kinase superfamily protein;(source:Araport11)
AT1G03770	1.05376	0.000366725	RING1B	RING 1B;(source:Araport11)
AT1G03800	2.16604	0.000146164	ERF10	ERF domain protein 10;(source:Araport11)
AT1G03850	1.62387	0.000371508	GRXS13	Glutaredoxin family protein;(source:Araport11)
AT1G03860	0.379473	0.0267962	PHB2	prohibitin 2;(source:Araport11)
AT1G03880	-2.10737	0.0178331	CRU2	cruciferin 2;(source:Araport11)
AT1G03920	-1.75705	0.0119923	AT1G03920	Protein kinase family protein;(source:Araport11)
AT1G04040	-0.627788	0.011774	AT1G04040	HAD superfamily, subfamily IIIB acid phosphatase;(source:Araport11)
AT1G04100	2.76728	8.98597e-19	IAA10	indoleacetic acid-induced protein 10;(source:Araport11)
AT1G04200	0.874294	0.00023399	AT1G04200	dyggve-melchior-clausen syndrome protein;(source:Araport11)
AT1G04240	-0.795475	0.00103087	SHY2	AUX/IAA transcriptional regulator family protein;(source:Araport11)
AT1G04270	-0.631977	0.0168469	RPS15	cytosolic ribosomal protein S15;(source:Araport11)
AT1G04280	0.399654	0.0316786	AT1G04280	P-loop containing nucleoside triphosphate hydrolases superfamily protein;(source:Araport11)
AT1G04350	-0.96972	0.0094894	AT1G04350	2-oxoglutarate (2OG) and Fe(II)-dependent oxygenase superfamily protein;(source:Araport11)
AT1G04370	3.45955	0.00114446	ERF14	Ethylene-responsive element binding factor 14;(source:Araport11)
AT1G04400	0.628234	0.00161705	CRY2	cryptochrome 2;(source:Araport11)
AT1G04420	-0.684987	0.000159113	AT1G04420	NAD(P)-linked oxidoreductase superfamily protein;(source:Araport11)
AT1G04520	-0.906304	0.0087876	PDLP2	plasmodesmata-located protein 2;(source:Araport11)
AT1G04540	2.74793	0.0146199	AT1G04540	Calcium-dependent lipid-binding (CaLB domain) family protein;(source:Araport11)
AT1G04555	0.988351	0.0103502	AT1G04555	transmembrane protein;(source:Araport11)
AT1G04620	-0.730875	0.00562258	HCAR	coenzyme F420 hydrogenase family / dehydrogenase, beta subunit family;(source:Araport11)
AT1G04640	-1.08526	0.00135475	LIP2	lipoyltransferase 2;(source:Araport11)
AT1G04650	-1.02086	0.0401809	AT1G04650	holliday junction resolvase;(source:Araport11)
AT1G04660	-1.38885	0.0218046	AT1G04660	glycine-rich protein;(source:Araport11)
AT1G04680	-0.811502	7.53869e-08	AT1G04680	Pectin lyase-like superfamily protein;(source:Araport11)
AT1G04750	0.376499	0.0386745	VAMP721	vesicle-associated membrane protein 721;(source:Araport11)
AT1G04770	-0.61627	0.0314495	AT1G04770	Tetratricopeptide repeat (TPR)-like superfamily protein;(source:Araport11)
AT1G04780	0.884459	3.05575e-05	AT1G04780	Ankyrin repeat family protein;(source:Araport11)
AT1G04800	-1.13522	3.61423e-07	AT1G04800	glycine-rich protein;(source:Araport11)
AT1G04920	-2.04334	0.00175018	SPS3F	sucrose phosphate synthase 3F;(source:Araport11)
AT1G04940	-0.862811	9.29805e-06	Tic20-I	translocon at the inner envelope membrane of chloroplasts 20;(source:Araport11)
AT1G04960	1.35164	1.07452e-13	AT1G04960	golgin family A protein (DUF1664);(source:Araport11)
AT1G04970	0.951844	0.000120884	AT1G04970	lipid-binding serum glycoprotein family protein;(source:Araport11)
AT1G04980	2.71993	2.76785e-57	PDIL2-2	PDI-like 2-2;(source:Araport11)
AT1G05000	3.07268	2.91502e-37	PFA-DSP1	Phosphotyrosine protein phosphatases superfamily protein;(source:Araport11)
AT1G05060	1.34096	6.2546e-14	AT1G05060	coiled-coil protein;(source:Araport11)
AT1G05160	-0.853972	0.0138505	CYP88A3	cytochrome P450, family 88, subfamily A, polypeptide 3;(source:Araport11)
AT1G05180	0.441718	0.0302166	AXR1	NAD(P)-binding Rossmann-fold superfamily protein;(source:Araport11)
AT1G05190	-1.23242	2.04819e-07	emb2394	Ribosomal protein L6 family;(source:Araport11)
AT1G05250	-3.48957	1.39927e-12	AT1G05250	Peroxidase superfamily protein;(source:Araport11)
AT1G05260	-1.12567	0.00587727	RCI3	Peroxidase superfamily protein;(source:Araport11)
AT1G05310	-1.90789	0.000170797	AT1G05310	Pectin lyase-like superfamily protein;(source:Araport11)
AT1G05320	-0.699225	0.0350258	AT1G05320	myosin heavy chain, embryonic smooth protein;(source:Araport11)
AT1G05340	1.56683	8.87607e-10	AT1G05340	cysteine-rich TM module stress tolerance protein;(source:Araport11)
AT1G05385	-1.04564	0.00144178	LPA19	photosystem II 11 kDa protein-like protein;(source:Araport11)
AT1G05460	-0.854691	0.0154161	SDE3	P-loop containing nucleoside triphosphate hydrolases superfamily protein;(source:Araport11)
AT1G05510	-2.02259	0.0168265	AT1G05510	naphthalene 1,2-dioxygenase subunit alpha (DUF1264);(source:Araport11)
AT1G05550	3.49645	0.000138674	AT1G05550	hypothetical protein (DUF295);(source:Araport11)
AT1G05575	2.59681	2.30445e-17	AT1G05575	transmembrane protein;(source:Araport11)
AT1G05630	-0.812016	0.0303688	5PTASE13	Endonuclease/exonuclease/phosphatase family protein;(source:Araport11)
AT1G05660	-2.67964	0.00946004	AT1G05660	Pectin lyase-like superfamily protein;(source:Araport11)
AT1G05675	6.76761	2.80346e-91	AT1G05675	UDP-Glycosyltransferase superfamily protein;(source:Araport11)
AT1G05680	1.43068	4.94336e-07	UGT74E2	Uridine diphosphate glycosyltransferase 74E2;(source:Araport11)
AT1G05710	0.914658	0.00556672	AT1G05710	basic helix-loop-helix (bHLH) DNA-binding superfamily protein;(source:Araport11)
AT1G05760	1.20936	0.00101994	RTM1	Mannose-binding lectin superfamily protein;(source:Araport11)
AT1G05800	3.9869	8.03838e-05	DGL	alpha/beta-Hydrolases superfamily protein;(source:Araport11)
AT1G05840	0.72178	0.000213747	AT1G05840	Eukaryotic aspartyl protease family protein;(source:Araport11)
AT1G05880	5.05062	4.14141e-08	ARI12	RING/U-box superfamily protein;(source:Araport11)
AT1G05890	0.463638	0.00845018	ARI5	RING/U-box superfamily protein;(source:Araport11)
AT1G05990	-3.06557	0.00175393	AT1G05990	EF hand calcium-binding protein family;(source:Araport11)
AT1G06080	2.60577	7.5451e-09	ADS1	delta 9 desaturase 1;(source:Araport11)
AT1G06090	-4.0802	2.16449e-06	AT1G06090	Fatty acid desaturase family protein;(source:Araport11)
AT1G06120	-4.08157	3.21191e-06	AT1G06120	Fatty acid desaturase family protein;(source:Araport11)
AT1G06130	1.24149	5.59978e-14	GLX2-4	glyoxalase 2-4;(source:Araport11)
AT1G06135	7.82465	3.27554e-26	AT1G06135	transmembrane protein;(source:Araport11)
AT1G06137	8.23759	7.76038e-31	AT1G06137	transmembrane protein;(source:Araport11)
AT1G06160	3.17159	7.11265e-16	ORA59	octadecanoid-responsive AP2/ERF 59;(source:Araport11)
AT1G06180	1.51117	8.23351e-08	MYB13	myb domain protein 13;(source:Araport11)
AT1G06190	-0.645631	0.0388886	RHON1	Rho termination factor;(source:Araport11)
AT1G06210	0.785554	5.36766e-05	AT1G06210	ENTH/VHS/GAT family protein;(source:Araport11)
AT1G06290	0.796218	2.08111e-07	ACX3	acyl-CoA oxidase 3;(source:Araport11)
AT1G06360	-2.64442	2.0855e-08	AT1G06360	Fatty acid desaturase family protein;(source:Araport11)
AT1G06400	0.45439	0.0235783	ARA-2	Ras-related small GTP-binding family protein;(source:Araport11)
AT1G06460	-0.957786	3.23854e-09	ACD32.1	alpha-crystallin domain 32.1;(source:Araport11)
AT1G06520	2.03505	0.000546384	GPAT1	glycerol-3-phosphate acyltransferase 1;(source:Araport11)
AT1G06570	1.45341	6.359e-07	PDS1	4-hydroxyphenylpyruvate dioxygenase;(source:Araport11)
AT1G06620	1.54953	4.65843e-11	AT1G06620	2-oxoglutarate (2OG) and Fe(II)-dependent oxygenase superfamily protein;(source:Araport11)
AT1G06640	-0.786355	3.92784e-08	AT1G06640	2-oxoglutarate (2OG) and Fe(II)-dependent oxygenase superfamily protein;(source:Araport11)
AT1G06645	-0.683881	0.0347474	AT1G06645	2-oxoglutarate (2OG) and Fe(II)-dependent oxygenase superfamily protein;(source:Araport11)
AT1G06650	0.645769	0.0353666	AT1G06650	2-oxoglutarate (2OG) and Fe(II)-dependent oxygenase superfamily protein;(source:Araport11)
AT1G06670	-0.438481	0.0272058	NIH	nuclear DEIH-boxhelicase;(source:Araport11)
AT1G06680	-1.30404	7.77245e-16	PSBP-1	photosystem II subunit P-1;(source:Araport11)
AT1G06690	-0.793752	0.00032504	AT1G06690	NAD(P)-linked oxidoreductase superfamily protein;(source:Araport11)
AT1G06720	-0.730308	0.00221186	AT1G06720	P-loop containing nucleoside triphosphate hydrolases superfamily protein;(source:Araport11)
AT1G06770	0.702251	0.0157922	DRIP1	DREB2A-interacting protein 1;(source:Araport11)
AT1G06800	2.1307	2.26968e-18	PLA-I{gamma}1	alpha/beta-Hydrolases superfamily protein;(source:Araport11)
AT1G06830	-1.32761	0.0257384	AT1G06830	Glutaredoxin family protein;(source:Araport11)
AT1G06840	1.42431	6.0215e-05	AT1G06840	Leucine-rich repeat protein kinase family protein;(source:Araport11)
AT1G06890	0.334456	0.0478414	AT1G06890	nodulin MtN21 /EamA-like transporter family protein;(source:Araport11)
AT1G06923	-3.818	3.24684e-06	AT1G06923	transcription repressor OFP17-like protein;(source:Araport11)
AT1G06960	-0.670113	0.00836442	AT1G06960	RNA-binding (RRM/RBD/RNP motifs) family protein;(source:Araport11)
AT1G07000	3.01841	5.06153e-23	EXO70B2	exocyst subunit exo70 family protein B2;(source:Araport11)
AT1G07040	0.656905	0.000826985	AT1G07040	plant/protein;(source:Araport11)
AT1G07050	-1.93827	1.44062e-05	AT1G07050	CCT motif family protein;(source:Araport11)
AT1G07090	0.488356	0.0331586	LSH6	LIGHT-DEPENDENT SHORT HYPOCOTYLS-like protein (DUF640);(source:Araport11)
AT1G07110	-0.850085	3.68e-06	F2KP	fructose-2,6-bisphosphatase;(source:Araport11)
AT1G07130	0.975188	0.000827718	STN1	Nucleic acid-binding, OB-fold-like protein;(source:Araport11)
AT1G07135	4.15696	1.49251e-60	AT1G07135	glycine-rich protein;(source:Araport11)
AT1G07150	1.58934	1.06562e-06	MAPKKK13	mitogen-activated protein kinase kinase kinase 13;(source:Araport11)
AT1G07160	6.42981	2.10694e-58	AT1G07160	Protein phosphatase 2C family protein;(source:Araport11)
AT1G07180	-1.94565	2.02763e-07	NDA1	alternative NAD(P)H dehydrogenase 1;(source:Araport11)
AT1G07230	0.766506	5.15864e-05	NPC1	non-specific phospholipase C1;(source:Araport11)
AT1G07240	1.09825	0.000246911	UGT71C5	UDP-glucosyl transferase 71C5;(source:Araport11)
AT1G07260	0.805331	0.00821453	UGT71C3	UDP-glucosyl transferase 71C3;(source:Araport11)
AT1G07310	0.606809	0.0148794	AT1G07310	Calcium-dependent lipid-binding (CaLB domain) family protein;(source:Araport11)
AT1G07320	-0.923659	0.000102513	RPL4	ribosomal protein L4;(source:Araport11)
AT1G07440	-0.659871	0.00833821	AT1G07440	NAD(P)-binding Rossmann-fold superfamily protein;(source:Araport11)
AT1G07510	0.723225	3.46929e-05	ftsh10	FTSH protease 10;(source:Araport11)
AT1G07520	0.765597	0.0015499	AT1G07520	GRAS family transcription factor;(source:Araport11)
AT1G07530	0.58899	0.00402573	SCL14	SCARECROW-like 14;(source:Araport11)
AT1G07610	-1.2405	0.00864956	MT1C	metallothionein 1C;(source:Araport11)
AT1G07620	4.58589	2.51585e-39	ATOBGM	GTP-binding protein Obg/CgtA;(source:Araport11)
AT1G07630	1.21202	1.86973e-06	PLL5	pol-like 5;(source:Araport11)
AT1G07640	0.623915	0.0237849	OBP2	Dof-type zinc finger DNA-binding family protein;(source:Araport11)
AT1G07670	0.898168	1.7769e-07	ECA4	endomembrane-type CA-ATPase 4;(source:Araport11)
AT1G07710	-2.01059	0.0380156	AT1G07710	Ankyrin repeat family protein;(source:Araport11)
AT1G07720	0.660168	8.03838e-05	KCS3	3-ketoacyl-CoA synthase 3;(source:Araport11)
AT1G07740	-0.684523	0.0483882	AT1G07740	Tetratricopeptide repeat (TPR)-like superfamily protein;(source:Araport11)
AT1G07750	-0.70983	0.000189186	AT1G07750	RmlC-like cupins superfamily protein;(source:Araport11)
AT1G07770	-0.659726	0.00634418	RPS15A	ribosomal protein S15A;(source:Araport11)
AT1G07780	-0.947734	0.0054789	PAI1	phosphoribosylanthranilate isomerase 1;(source:Araport11)
AT1G07810	0.547318	0.000834809	ECA1	ER-type Ca2+-ATPase 1;(source:Araport11)
AT1G07820	-0.439878	0.0461934	AT1G07820	Histone superfamily protein;(source:Araport11)
AT1G07870	0.626362	0.0265524	AT1G07870	Protein kinase superfamily protein;(source:Araport11)
AT1G07890	0.864312	4.9077e-10	APX1	ascorbate peroxidase 1;(source:Araport11)
AT1G07900	3.99092	1.38041e-06	LBD1	LOB domain-containing protein 1;(source:Araport11)
AT1G07990	0.546954	0.000911348	AT1G07990	SIT4 phosphatase-associated family protein;(source:Araport11)
AT1G08050	2.53427	8.49555e-25	AT1G08050	Zinc finger (C3HC4-type RING finger) family protein;(source:Araport11)
AT1G08080	3.50168	6.353e-05	ACA7	alpha carbonic anhydrase 7;(source:Araport11)
AT1G08090	-2.31737	0.00650691	NRT2:1	nitrate transporter 2:1;(source:Araport11)
AT1G08110	-0.500367	0.00634392	AT1G08110	lactoylglutathione lyase family protein / glyoxalase I family protein;(source:Araport11)
AT1G08200	-0.532482	0.00122288	AXS2	UDP-D-apiose/UDP-D-xylose synthase 2;(source:Araport11)
AT1G08250	1.15854	1.74971e-07	ADT6	arogenate dehydratase 6;(source:Araport11)
AT1G08290	2.03595	0.00243407	WIP3	WIP domain protein 3;(source:Araport11)
AT1G08315	1.58078	3.6413e-10	AT1G08315	ARM repeat superfamily protein;(source:Araport11)
AT1G08340	-1.68635	2.62543e-05	AT1G08340	Rho GTPase activating protein with PAK-box/P21-Rho-binding domain-containing protein;(source:Araport11)
AT1G08380	-1.70502	5.38327e-25	PSAO	photosystem I subunit O;(source:Araport11)
AT1G08450	0.911125	7.72169e-06	CRT3	calreticulin 3;(source:Araport11)
AT1G08500	-0.642655	0.031816	ENODL18	early nodulin-like protein 18;(source:Araport11)
AT1G08520	-0.499435	0.00201927	ALB1	ALBINA 1;(source:Araport11)
AT1G08540	-0.681417	0.000434352	SIG2	RNApolymerase sigma subunit 2;(source:Araport11)
AT1G08550	-1.09796	2.24747e-06	NPQ1	non-photochemical quenching 1;(source:Araport11)
AT1G08560	-0.671069	0.01497	SYP111	syntaxin of plants 111;(source:Araport11)
AT1G08590	-0.706361	0.00288245	AT1G08590	Leucine-rich receptor-like protein kinase family protein;(source:Araport11)
AT1G08610	-0.825297	0.00781826	AT1G08610	Pentatricopeptide repeat (PPR) superfamily protein;(source:Araport11)
AT1G08620	0.659371	0.000453364	PKDM7D	Transcription factor jumonji (jmj) family protein / zinc finger (C5HC2 type) family protein;(source:Araport11)
AT1G08630	0.789768	1.57541e-05	THA1	threonine aldolase 1;(source:Araport11)
AT1G08650	-0.796256	0.00101575	PPCK1	phosphoenolpyruvate carboxylase kinase 1;(source:Araport11)
AT1G08720	1.04612	5.18404e-05	EDR1	Protein kinase superfamily protein;(source:Araport11)
AT1G08800	1.43561	7.1922e-06	AT1G08800	myosin-binding protein (Protein of unknown function, DUF593);(source:Araport11)
AT1G08820	0.869211	4.04762e-08	VAP27-2	vamp/synaptobrevin-associated protein 27-2;(source:Araport11)
AT1G08830	1.29816	6.91804e-08	CSD1	copper/zinc superoxide dismutase 1;(source:Araport11)
AT1G08860	2.72955	0.00051869	BON3	Calcium-dependent phospholipid-binding Copine family protein;(source:Araport11)
AT1G08930	0.990775	2.00981e-05	ERD6	Major facilitator superfamily protein;(source:Araport11)
AT1G08940	3.37393	3.57148e-43	AT1G08940	Phosphoglycerate mutase family protein;(source:Araport11)
AT1G08990	-2.02475	0.000314522	PGSIP5	plant glycogenin-like starch initiation protein 5;(source:Araport11)
AT1G09060	0.672164	0.00463906	AT1G09060	JmjC domain protein JMJ24;(source:Araport11)
AT1G09070	2.28407	2.10147e-45	SRC2	soybean gene regulated by cold-2;(source:Araport11)
AT1G09080	5.98764	1.18101e-35	BIP3	Heat shock protein 70 (Hsp 70) family protein;(source:Araport11)
AT1G09170	-2.43494	0.00590021	AT1G09170	P-loop nucleoside triphosphate hydrolases superfamily protein with CH (Calponin Homology) domain-containing protein;(source:Araport11)
AT1G09180	5.20673	8.54207e-16	SARA1A	secretion-associated RAS super family 1;(source:Araport11)
AT1G09210	0.844929	0.000981052	CRT1b	calreticulin 1b;(source:Araport11)
AT1G09270	0.434006	0.0322006	IMPA-4	importin alpha isoform 4;(source:Araport11)
AT1G09310	-0.59506	8.6105e-05	AT1G09310	plant/protein (Protein of unknown function, DUF538);(source:Araport11)
AT1G09340	-1.34509	1.15711e-14	CRB	chloroplast RNA binding protein;(source:Araport11)
AT1G09390	-0.918637	0.000746054	AT1G09390	GDSL-like Lipase/Acylhydrolase superfamily protein;(source:Araport11)
AT1G09440	-1.34841	0.000170493	AT1G09440	Protein kinase superfamily protein;(source:Araport11)
AT1G09480	2.99448	9.93736e-25	AT1G09480	NAD(P)-binding Rossmann-fold superfamily protein;(source:Araport11)
AT1G09490	0.714326	0.00417023	AT1G09490	NAD(P)-binding Rossmann-fold superfamily protein;(source:Araport11)
AT1G09500	5.17735	8.52964e-46	AT1G09500	NAD(P)-binding Rossmann-fold superfamily protein;(source:Araport11)
AT1G09530	0.694674	0.0374302	PIF3	phytochrome interacting factor 3;(source:Araport11)
AT1G09560	1.76026	7.50742e-07	GLP5	germin-like protein 5;(source:Araport11)
AT1G09570	1.01749	1.90669e-07	PHYA	phytochrome A;(source:Araport11)
AT1G09575	1.41487	0.00340779	AT1G09575	calcium uniporter-like protein (DUF607);(source:Araport11)
AT1G09630	0.878897	1.30621e-06	RAB11c	RAB GTPase 11C;(source:Araport11)
AT1G09645	1.11313	1.31755e-06	AT1G09645	transmembrane protein;(source:Araport11)
AT1G09660	-1.29679	4.49958e-09	AT1G09660	RNA-binding KH domain-containing protein;(source:Araport11)
AT1G09690	-0.606663	0.0233353	AT1G09690	Translation protein SH3-like family protein;(source:Araport11)
AT1G09750	-1.06017	8.45437e-12	AT1G09750	Eukaryotic aspartyl protease family protein;(source:Araport11)
AT1G09795	-0.540581	0.0375001	ATP-PRT2	ATP phosphoribosyl transferase 2;(source:Araport11)
AT1G09800	-0.909915	0.0192709	AT1G09800	Pseudouridine synthase family protein;(source:Araport11)
AT1G09810	0.679698	0.0278757	ECT11	evolutionarily conserved C-terminal region 11;(source:Araport11)
AT1G09900	-0.707433	0.0196962	AT1G09900	Pentatricopeptide repeat (PPR-like) superfamily protein;(source:Araport11)
AT1G09910	0.672205	0.00182897	AT1G09910	Rhamnogalacturonate lyase family protein;(source:Araport11)
AT1G09920	0.516266	0.0185214	AT1G09920	TRAF-type zinc finger-like protein;(source:Araport11)
AT1G09932	4.3885	3.04998e-38	AT1G09932	Phosphoglycerate mutase family protein;(source:Araport11)
AT1G09935	4.97095	5.83131e-08	AT1G09935	Phosphoglycerate mutase family protein;(source:Araport11)
AT1G09940	2.30314	1.98986e-62	HEMA2	Glutamyl-tRNA reductase family protein;(source:Araport11)
AT1G09970	1.63568	2.43371e-19	LRR XI-23	Leucine-rich receptor-like protein kinase family protein;(source:Araport11)
AT1G10000	-1.79283	0.0354854	AT1G10000	Ribonuclease H-like superfamily protein;(source:Araport11)
AT1G10020	-0.809645	0.000179416	AT1G10020	formin-like protein (DUF1005);(source:Araport11)
AT1G10030	-1.11394	0.000131226	ERG28	ergosterol biosynthesis protein;(source:Araport11)
AT1G10040	3.14781	5.22418e-30	AT1G10040	alpha/beta-Hydrolases superfamily protein;(source:Araport11)
AT1G10050	1.43956	6.2184e-12	AT1G10050	glycosyl hydrolase family 10 protein / carbohydrate-binding domain-containing protein;(source:Araport11)
AT1G10070	0.920158	0.00074189	BCAT-2	branched-chain amino acid transaminase 2;(source:Araport11)
AT1G10120	-0.87372	0.000327675	AT1G10120	basic helix-loop-helix (bHLH) DNA-binding superfamily protein;(source:Araport11)
AT1G10140	2.16854	7.88284e-14	AT1G10140	Uncharacterized conserved protein UCP031279;(source:Araport11)
AT1G10150	1.06282	0.000395642	AT1G10150	Carbohydrate-binding protein;(source:Araport11)
AT1G10170	0.925267	9.97577e-07	NFXL1	NF-X-like 1;(source:Araport11)
AT1G10200	-0.677069	0.00563895	WLIM1	GATA type zinc finger transcription factor family protein;(source:Araport11)
AT1G10220	2.03252	0.0116451	AT1G10220	ZCF37;(source:Araport11)
AT1G10340	1.49776	0.0220222	AT1G10340	Ankyrin repeat family protein;(source:Araport11)
AT1G10360	-1.30286	5.81549e-05	GSTU18	glutathione S-transferase TAU 18;(source:Araport11)
AT1G10370	1.08927	0.000427462	ERD9	Glutathione S-transferase family protein;(source:Araport11)
AT1G10390	0.511458	0.000797503	AT1G10390	Nucleoporin autopeptidase;(source:Araport11)
AT1G10410	1.21923	6.48152e-05	AT1G10410	CW14 protein (DUF1336);(source:Araport11)
AT1G10470	-0.720747	0.0256534	ARR4	response regulator 4;(source:Araport11)
AT1G10500	0.470743	0.0161821	CPISCA	chloroplast-localized ISCA-like protein;(source:Araport11)
AT1G10522	-0.865012	0.00463065	PRIN2	Serine/Threonine-kinase;(source:Araport11)
AT1G10530	-1.59547	0.0468678	AT1G10530	D-ribose-binding periplasmic protein;(source:Araport11)
AT1G10585	4.94984	1.96759e-30	AT1G10585	basic helix-loop-helix (bHLH) DNA-binding superfamily protein;(source:Araport11)
AT1G10650	1.72403	2.06557e-21	AT1G10650	SBP (S-ribonuclease binding protein) family protein;(source:Araport11)
AT1G10657	-1.52276	8.1775e-07	AT1G10657	transmembrane protein;(source:Araport11)
AT1G10690	1.34892	4.52067e-08	AT1G10690	cyclin-dependent kinase inhibitor;(source:Araport11)
AT1G10700	2.931	9.45382e-57	PRS3	phosphoribosyl pyrophosphate (PRPP) synthase 3;(source:Araport11)
AT1G10720	0.461757	0.0201138	AT1G10720	BSD domain-containing protein;(source:Araport11)
AT1G10740	0.777758	0.000838352	AT1G10740	alpha/beta-Hydrolases superfamily protein;(source:Araport11)
AT1G10760	-0.583782	0.00984535	SEX1	Pyruvate phosphate dikinase, PEP/pyruvate binding domain-containing protein;(source:Araport11)
AT1G10820	-0.831892	8.57777e-05	AT1G10820	hypothetical protein (DUF3755);(source:Araport11)
AT1G10850	-0.822707	0.0168794	AT1G10850	Leucine-rich repeat protein kinase family protein;(source:Araport11)
AT1G10865	0.595019	0.018416	AT1G10865	cytochrome C oxidase assembly factor;(source:Araport11)
AT1G10900	0.644564	0.000840626	AT1G10900	Phosphatidylinositol-4-phosphate 5-kinase family protein;(source:Araport11)
AT1G10910	-0.625279	0.00848879	EMB3103	Pentatricopeptide repeat (PPR) superfamily protein;(source:Araport11)
AT1G10920	1.28811	0.031566	LOV1	NB-ARC domain-containing disease resistance protein;(source:Araport11)
AT1G10930	-1.15887	0.000598361	RECQ4A	DNA helicase (RECQl4A);(source:Araport11)
AT1G10990	2.494	2.92254e-08	AT1G10990	transmembrane protein;(source:Araport11)
AT1G11050	2.48087	1.94422e-30	AT1G11050	Protein kinase superfamily protein;(source:Araport11)
AT1G11100	1.48437	0.00201961	AT1G11100	SNF2 domain-containing protein / helicase domain-containing protein / zinc finger protein-like protein;(source:Araport11)
AT1G11130	-0.736582	0.00527278	SUB	Leucine-rich repeat protein kinase family protein;(source:Araport11)
AT1G11160	-2.28923	9.93157e-05	AT1G11160	Transducin/WD40 repeat-like superfamily protein;(source:Araport11)
AT1G11180	0.880911	0.00578684	SCAMP2	Secretory carrier membrane protein (SCAMP) family protein;(source:Araport11)
AT1G11200	1.06755	0.00132939	AT1G11200	organic solute transporter ostalpha protein (DUF300);(source:Araport11)
AT1G11290	-0.841163	0.0258207	CRR22	Pentatricopeptide repeat (PPR) superfamily protein;(source:Araport11)
AT1G11300	2.10478	7.56747e-12	AT1G11300	G-type lectin S-receptor-like Serine/Threonine-kinase;(source:Araport11)
AT1G11310	1.55088	3.24456e-11	MLO2	Seven transmembrane MLO family protein;(source:Araport11)
AT1G11330	1.37664	1.78679e-07	AT1G11330	S-locus lectin protein kinase family protein;(source:Araport11)
AT1G11370	2.6407	0.0108303	AT1G11370	Pectin lyase-like superfamily protein;(source:Araport11)
AT1G11380	-0.945008	0.000104587	AT1G11380	PLAC8 family protein;(source:Araport11)
AT1G11400	0.608259	0.00307884	PYM	partner of Y14-MAGO;(source:Araport11)
AT1G11440	0.53362	0.0310679	AT1G11440	hypothetical protein;(source:Araport11)
AT1G11460	-1.83177	0.0154389	UMAMIT26	nodulin MtN21 /EamA-like transporter family protein;(source:Araport11)
AT1G11480	0.477611	0.00855323	AT1G11480	eukaryotic translation initiation factor-like protein;(source:Araport11)
AT1G11600	-1.30929	0.000102517	CYP77B1	cytochrome P450, family 77, subfamily B, polypeptide 1;(source:Araport11)
AT1G11610	6.5699	4.20618e-15	CYP71A18	cytochrome P450, family 71, subfamily A, polypeptide 18;(source:Araport11)
AT1G11700	-1.06496	0.0351648	AT1G11700	senescence regulator (Protein of unknown function, DUF584);(source:Araport11)
AT1G11720	-0.968748	0.000722498	SS3	starch synthase 3;(source:Araport11)
AT1G11820	-0.566	0.00404398	AT1G11820	O-Glycosyl hydrolases family 17 protein;(source:Araport11)
AT1G11840	-0.810274	0.000840143	GLX1	glyoxalase/bleomycin resistance protein/dioxygenase superfamily protein;(source:Araport11)
AT1G11860	-1.1421	6.35777e-22	AT1G11860	Glycine cleavage T-protein family;(source:Araport11)
AT1G11890	0.795013	1.63607e-07	SEC22	Synaptobrevin family protein;(source:Araport11)
AT1G11905	0.684972	0.00211801	AT1G11905	B-cell receptor-associated protein 31-like protein;(source:Araport11)
AT1G11925	3.84788	1.51221e-05	AT1G11925	Stigma-specific Stig1 family protein;(source:Araport11)
AT1G11960	0.90113	2.44969e-05	AT1G11960	ERD (early-responsive to dehydration stress) family protein;(source:Araport11)
AT1G12020	-1.08283	0.0030649	AT1G12020	hypothetical protein;(source:Araport11)
AT1G12030	2.07961	0.00472515	AT1G12030	phosphoenolpyruvate carboxylase, putative (DUF506);(source:Araport11)
AT1G12040	-2.03258	1.42264e-08	LRX1	leucine-rich repeat/extensin 1;(source:Araport11)
AT1G12050	0.496366	0.00955889	AT1G12050	fumarylacetoacetase;(source:Araport11)
AT1G12064	-2.24755	0.00561965	AT1G12064	transmembrane protein;(source:Araport11)
AT1G12090	-0.728938	0.0110887	ELP	extensin-like protein;(source:Araport11)
AT1G12130	-1.72247	0.0438386	AT1G12130	Flavin-binding monooxygenase family protein;(source:Araport11)
AT1G12150	-1.68105	0.031425	AT1G12150	weak chloroplast movement under blue light protein (DUF827);(source:Araport11)
AT1G12200	2.10433	3.47862e-11	FMO	Flavin-binding monooxygenase family protein;(source:Araport11)
AT1G12220	0.723246	0.0399808	RPS5	Disease resistance protein (CC-NBS-LRR class) family;(source:Araport11)
AT1G12244	-1.03089	0.016156	AT1G12244	Polynucleotidyl transferase, ribonuclease H-like superfamily protein;(source:Araport11)
AT1G12250	-0.987126	0.000101519	AT1G12250	Pentapeptide repeat-containing protein;(source:Araport11)
AT1G12320	1.91319	1.89249e-07	AT1G12320	ankyrin repeat/KH domain protein (DUF1442);(source:Araport11)
AT1G12330	-0.997577	3.65859e-06	AT1G12330	cyclin-dependent kinase-like protein;(source:Araport11)
AT1G12360	1.06575	5.63035e-14	KEU	Sec1/munc18-like (SM) proteins superfamily;(source:Araport11)
AT1G12430	-0.479076	0.0462658	ARK3	armadillo repeat kinesin 3;(source:Araport11)
AT1G12460	-1.14063	7.90735e-06	AT1G12460	Leucine-rich repeat protein kinase family protein;(source:Araport11)
AT1G12470	0.497408	0.04788	AT1G12470	zinc ion binding protein;(source:Araport11)
AT1G12480	-1.44256	0.000360521	OZS1	C4-dicarboxylate transporter/malic acid transport protein;(source:Araport11)
AT1G12500	-0.503897	0.0135778	AT1G12500	Nucleotide-sugar transporter family protein;(source:Araport11)
AT1G12560	-1.79573	0.00329618	EXPA7	expansin A7;(source:Araport11)
AT1G12640	0.510113	0.0135996	LPLAT1	MBOAT (membrane bound O-acyl transferase) family protein;(source:Araport11)
AT1G12710	-0.846051	0.0031686	PP2-A12	phloem protein 2-A12;(source:Araport11)
AT1G12730	-0.852385	0.00554413	AT1G12730	GPI transamidase subunit PIG-U;(source:Araport11)
AT1G12740	-1.73964	0.000253961	CYP87A2	cytochrome P450, family 87, subfamily A, polypeptide 2;(source:Araport11)
AT1G12760	0.355571	0.0428427	AT1G12760	Zinc finger, C3HC4 type (RING finger) family protein;(source:Araport11)
AT1G12800	-0.812847	5.83526e-07	AT1G12800	Nucleic acid-binding, OB-fold-like protein;(source:Araport11)
AT1G12840	0.427042	0.0324547	DET3	vacuolar ATP synthase subunit C (VATC) / V-ATPase C subunit / vacuolar proton pump C subunit (DET3);(source:Araport11)
AT1G12860	-0.625147	0.000494916	SCRM2	basic helix-loop-helix (bHLH) DNA-binding superfamily protein;(source:Araport11)
AT1G12900	-1.31617	5.67077e-25	GAPA-2	glyceraldehyde 3-phosphate dehydrogenase A subunit 2;(source:Araport11)
AT1G12950	-1.41605	0.000294335	RSH2	root hair specific 2;(source:Araport11)
AT1G13000	0.796511	0.00233637	AT1G13000	transmembrane protein, putative (DUF707);(source:Araport11)
AT1G13110	0.877018	0.0333356	CYP71B7	cytochrome P450, family 71 subfamily B, polypeptide 7;(source:Araport11)
AT1G13170	-0.683651	0.00138707	ORP1D	OSBP(oxysterol binding protein)-related protein 1D;(source:Araport11)
AT1G13180	0.703654	0.0225839	DIS1	Actin-like ATPase superfamily protein;(source:Araport11)
AT1G13190	0.539407	0.0384132	AT1G13190	RNA-binding (RRM/RBD/RNP motifs) family protein;(source:Araport11)
AT1G13195	0.651499	0.0275844	AT1G13195	RING/U-box superfamily protein;(source:Araport11)
AT1G13210	2.53131	3.70616e-28	ACA.l	autoinhibited Ca2+/ATPase II;(source:Araport11)
AT1G13245	0.941456	0.0025892	RTFL17	ROTUNDIFOLIA like 17;(source:Araport11)
AT1G13250	-0.805195	0.00211472	GATL3	galacturonosyltransferase-like 3;(source:Araport11)
AT1G13270	-0.505181	0.0127853	MAP1C	methionine aminopeptidase 1B;(source:Araport11)
AT1G13300	-1.43287	0.017058	HRS1	myb-like transcription factor family protein;(source:Araport11)
AT1G13340	4.18723	5.82974e-53	AT1G13340	Regulator of Vps4 activity in the MVB pathway protein;(source:Araport11)
AT1G13360	0.689049	8.61627e-05	AT1G13360	hypothetical protein;(source:Araport11)
AT1G13420	-3.79353	4.50671e-22	ST4B	sulfotransferase 4B;(source:Araport11)
AT1G13440	-0.728779	1.33592e-07	GAPC2	glyceraldehyde-3-phosphate dehydrogenase C2;(source:Araport11)
AT1G13450	0.849261	2.22647e-06	GT-1	Homeodomain-like superfamily protein;(source:Araport11)
AT1G13470	2.29221	0.0425407	AT1G13470	hypothetical protein (DUF1262);(source:Araport11)
AT1G13480	4.40845	7.87832e-38	AT1G13480	hypothetical protein (DUF1262);(source:Araport11)
AT1G13490	3.29758	4.52976e-05	AT1G13490	hypothetical protein (DUF1262);(source:Araport11)
AT1G13500	-2.34569	0.00330486	AT1G13500	hypothetical protein (DUF1262);(source:Araport11)
AT1G13520	5.12307	2.2077e-12	AT1G13520	hypothetical protein (DUF1262);(source:Araport11)
AT1G13530	1.29673	2.61559e-05	AT1G13530	hypothetical protein (DUF1262);(source:Araport11)
AT1G13550	2.78822	0.00120806	AT1G13550	hypothetical protein (DUF1262);(source:Araport11)
AT1G13640	-0.992801	0.00165297	AT1G13640	Phosphatidylinositol 3- and 4-kinase family protein;(source:Araport11)
AT1G13700	-0.987241	0.0386147	PGL1	6-phosphogluconolactonase 1;(source:Araport11)
AT1G13710	-0.911129	0.000173466	CYP78A5	cytochrome P450, family 78, subfamily A, polypeptide 5;(source:Araport11)
AT1G13730	-0.786304	0.000563355	AT1G13730	Nuclear transport factor 2 (NTF2) family protein with RNA binding (RRM-RBD-RNP motifs) domain-containing protein;(source:Araport11)
AT1G13830	-0.906627	0.0270664	AT1G13830	Carbohydrate-binding X8 domain superfamily protein;(source:Araport11)
AT1G13930	-1.49398	2.02292e-24	AT1G13930	oleosin-B3-like protein;(source:Araport11)
AT1G13970	-1.27976	0.00628961	AT1G13970	beta-hexosaminidase (DUF1336);(source:Araport11)
AT1G13990	1.57515	2.89316e-23	AT1G13990	plant/protein;(source:Araport11)
AT1G14000	1.0739	1.91127e-07	VIK	VH1-interacting kinase;(source:Araport11)
AT1G14010	1.26729	2.70722e-13	AT1G14010	emp24/gp25L/p24 family/GOLD family protein;(source:Araport11)
AT1G14030	-0.946877	1.75527e-05	LSMT-L	Rubisco methyltransferase family protein;(source:Araport11)
AT1G14040	2.93669	4.17937e-11	AT1G14040	EXS (ERD1/XPR1/SYG1) family protein;(source:Araport11)
AT1G14150	-1.96856	5.80708e-23	PnsL2	PsbQ-like 2;(source:Araport11)
AT1G14170	1.90605	1.57893e-07	AT1G14170	RNA-binding KH domain-containing protein;(source:Araport11)
AT1G14220	-1.67061	0.027988	AT1G14220	Ribonuclease T2 family protein;(source:Araport11)
AT1G14250	-2.16392	0.00325252	AT1G14250	GDA1/CD39 nucleoside phosphatase family protein;(source:Araport11)
AT1G14260	3.39982	2.38394e-08	AT1G14260	RING/FYVE/PHD zinc finger superfamily protein;(source:Araport11)
AT1G14270	-1.03729	3.04378e-08	AT1G14270	CAAX amino terminal protease family protein;(source:Araport11)
AT1G14290	-0.654284	0.00759365	SBH2	sphingoid base hydroxylase 2;(source:Araport11)
AT1G14330	1.9245	1.16382e-16	AT1G14330	Galactose oxidase/kelch repeat superfamily protein;(source:Araport11)
AT1G14345	-1.77132	6.47401e-09	AT1G14345	NAD(P)-linked oxidoreductase superfamily protein;(source:Araport11)
AT1G14350	-0.503836	0.022752	FLP	Duplicated homeodomain-like superfamily protein;(source:Araport11)
AT1G14360	2.45507	2.41636e-36	UTR3	UDP-galactose transporter 3;(source:Araport11)
AT1G14370	2.26071	2.81707e-39	APK2A	protein kinase 2A;(source:Araport11)
AT1G14380	-0.767475	0.00127259	IQD28	IQ-domain 28;(source:Araport11)
AT1G14410	-0.838132	0.00105191	WHY1	ssDNA-binding transcriptional regulator;(source:Araport11)
AT1G14430	-1.35735	1.14843e-06	AT1G14430	glyoxal oxidase-related protein;(source:Araport11)
AT1G14480	1.23855	0.010465	AT1G14480	Ankyrin repeat family protein;(source:Araport11)
AT1G14540	6.89142	7.7335e-68	PER4	Peroxidase superfamily protein;(source:Araport11)
AT1G14550	9.34913	4.20571e-136	AT1G14550	Peroxidase superfamily protein;(source:Araport11)
AT1G14600	0.873357	0.015729	AT1G14600	Homeodomain-like superfamily protein;(source:Araport11)
AT1G14640	1.59719	0.000109794	AT1G14640	SWAP (Suppressor-of-White-APricot)/surp domain-containing protein;(source:Araport11)
AT1G14780	1.25454	0.00114583	AT1G14780	MAC/Perforin domain-containing protein;(source:Araport11)
AT1G14820	-1.09756	2.16413e-07	AT1G14820	Sec14p-like phosphatidylinositol transfer family protein;(source:Araport11)
AT1G14830	0.413858	0.00731758	DL1C	DYNAMIN-like 1C;(source:Araport11)
AT1G14840	-0.60829	0.0232427	MAP70-4	microtubule-associated proteins 70-4;(source:Araport11)
AT1G14870	2.52494	4.44507e-10	PCR2	PLANT CADMIUM RESISTANCE 2;(source:Araport11)
AT1G14890	1.17004	1.57697e-05	AT1G14890	Plant invertase/pectin methylesterase inhibitor superfamily protein;(source:Araport11)
AT1G14930	-2.79885	0.00436018	AT1G14930	Polyketide cyclase/dehydrase and lipid transport superfamily protein;(source:Araport11)
AT1G14940	-2.41967	0.0283561	AT1G14940	Polyketide cyclase/dehydrase and lipid transport superfamily protein;(source:Araport11)
AT1G14950	-2.6277	0.00798895	AT1G14950	Polyketide cyclase/dehydrase and lipid transport superfamily protein;(source:Araport11)
AT1G14960	-4.01192	1.29214e-12	AT1G14960	Polyketide cyclase/dehydrase and lipid transport superfamily protein;(source:Araport11)
AT1G14970	-1.42673	0.0133548	AT1G14970	O-fucosyltransferase family protein;(source:Araport11)
AT1G15010	3.8273	2.04314e-23	AT1G15010	mediator of RNA polymerase II transcription subunit;(source:Araport11)
AT1G15040	3.1811	1.59844e-42	GAT1_2.1	Class I glutamine amidotransferase-like superfamily protein;(source:Araport11)
AT1G15080	-1.06762	0.0439808	LPP2	lipid phosphate phosphatase 2;(source:Araport11)
AT1G15110	0.934603	0.00014302	PSS1	phosphatidyl serine synthase family protein;(source:Araport11)
AT1G15125	2.62891	3.13748e-22	AT1G15125	S-adenosyl-L-methionine-dependent methyltransferases superfamily protein;(source:Araport11)
AT1G15130	0.476888	0.0489274	AT1G15130	Endosomal targeting BRO1-like domain-containing protein;(source:Araport11)
AT1G15170	1.40677	2.4123e-17	AT1G15170	MATE efflux family protein;(source:Araport11)
AT1G15180	-0.965205	0.0221472	AT1G15180	MATE efflux family protein;(source:Araport11)
AT1G15210	-1.38637	1.46269e-09	ABCG35	pleiotropic drug resistance 7;(source:Araport11)
AT1G15260	-2.29308	1.29891e-14	AT1G15260	LOW protein: ATP-dependent RNA helicase-like protein;(source:Araport11)
AT1G15270	0.495569	0.00866835	AT1G15270	Translation machinery associated TMA7;(source:Araport11)
AT1G15290	-1.13644	3.07904e-05	AT1G15290	Tetratricopeptide repeat (TPR)-like superfamily protein;(source:Araport11)
AT1G15310	0.643366	0.0429899	ATHSRP54A	signal recognition particle 54 kDa subunit;(source:Araport11)
AT1G15380	1.76306	1.82148e-14	GLYI4	Lactoylglutathione lyase / glyoxalase I family protein;(source:Araport11)
AT1G15385	3.10869	3.99153e-07	AT1G15385	cotton fiber protein;(source:Araport11)
AT1G15390	-0.845636	0.0156477	PDF1A	peptide deformylase 1A;(source:Araport11)
AT1G15400	0.545378	0.00241718	AT1G15400	hypothetical protein;(source:Araport11)
AT1G15415	4.25385	1.52377e-28	AT1G15415	late embryogenesis abundant-like protein;(source:Araport11)
AT1G15420	-0.812691	0.00422263	AT1G15420	WD repeat protein;(source:Araport11)
AT1G15430	1.57528	6.85568e-13	AT1G15430	hypothetical protein (DUF1644);(source:Araport11)
AT1G15440	-0.813891	0.000509992	PWP2	periodic tryptophan protein 2;(source:Araport11)
AT1G15500	-1.00888	0.00956288	ATNTT2	TLC ATP/ADP transporter;(source:Araport11)
AT1G15520	11.2784	2.45187e-211	ABCG40	pleiotropic drug resistance 12;(source:Araport11)
AT1G15530	1.56809	1.82002e-09	AT1G15530	Concanavalin A-like lectin protein kinase family protein;(source:Araport11)
AT1G15580	3.30305	0.000305398	IAA5	indole-3-acetic acid inducible 5;(source:Araport11)
AT1G15625	2.7042	1.80465e-06	AT1G15625	E3 ubiquitin-protein ligase;(source:Araport11)
AT1G15640	-2.87395	0.0020422	AT1G15640	transmembrane protein;(source:Araport11)
AT1G15660	-0.618721	0.0286826	CENP-C	centromere protein C;(source:Araport11)
AT1G15670	1.39492	6.00562e-05	AT1G15670	Galactose oxidase/kelch repeat superfamily protein;(source:Araport11)
AT1G15690	-0.772128	2.71297e-09	AVP1	Inorganic H pyrophosphatase family protein;(source:Araport11)
AT1G15750	0.513311	0.0373599	TPL	Transducin family protein / WD-40 repeat family protein;(source:Araport11)
AT1G15780	0.967903	1.46765e-06	NRB4	mediator of RNA polymerase II transcription subunit 15a-like protein;(source:Araport11)
AT1G15820	-1.22225	1.46846e-11	LHCB6	light harvesting complex photosystem II subunit 6;(source:Araport11)
AT1G15860	0.503615	0.027413	AT1G15860	defective in cullin neddylation protein (DUF298);(source:Araport11)
AT1G15880	0.492855	0.0142326	GOS11	golgi snare 11;(source:Araport11)
AT1G15890	1.05707	0.00872485	AT1G15890	Disease resistance protein (CC-NBS-LRR class) family;(source:Araport11)
AT1G15960	-2.52714	8.1277e-05	NRAMP6	NRAMP metal ion transporter 6;(source:Araport11)
AT1G15980	-1.25736	5.95928e-10	PnsB1	NDH-dependent cyclic electron flow 1;(source:Araport11)
AT1G16000	-0.719822	0.0374531	AT1G16000	GAG1At protein;(source:Araport11)
AT1G16020	-0.536909	0.0239609	AT1G16020	vacuolar fusion protein (DUF1712);(source:Araport11)
AT1G16080	-0.629056	0.00212365	AT1G16080	nuclear protein;(source:Araport11)
AT1G16090	3.17363	7.51368e-13	WAKL7	wall associated kinase-like 7;(source:Araport11)
AT1G16130	2.3017	9.46706e-09	WAKL2	wall associated kinase-like 2;(source:Araport11)
AT1G16180	0.851918	1.59578e-05	AT1G16180	Serinc-domain containing serine and sphingolipid biosynthesis protein;(source:Araport11)
AT1G16210	0.502903	0.00608214	AT1G16210	coiled-coil protein;(source:Araport11)
AT1G16220	-1.22535	0.0401629	AT1G16220	Protein phosphatase 2C family protein;(source:Araport11)
AT1G16260	1.1361	5.57456e-05	AT1G16260	Wall-associated kinase family protein;(source:Araport11)
AT1G16300	0.857613	0.0225528	GAPCP-2	glyceraldehyde-3-phosphate dehydrogenase of plastid 2;(source:Araport11)
AT1G16350	-0.672493	0.00089121	AT1G16350	Aldolase-type TIM barrel family protein;(source:Araport11)
AT1G16370	0.864741	0.0331022	2006-10-01	organic cation/carnitine transporter 6;(source:Araport11)
AT1G16420	3.06181	2.6315e-14	MC8	metacaspase 8;(source:Araport11)
AT1G16440	-2.49444	0.00566209	RSH3	root hair specific 3;(source:Araport11)
AT1G16500	-1.49426	0.000915529	AT1G16500	filamentous hemagglutinin transporter;(source:Araport11)
AT1G16510	-1.0547	0.00473009	AT1G16510	SAUR-like auxin-responsive protein family;(source:Araport11)
AT1G16540	0.936028	0.0188301	ABA3	molybdenum cofactor sulfurase (LOS5) (ABA3);(source:Araport11)
AT1G16630	-0.673625	0.0490918	AT1G16630	transmembrane protein;(source:Araport11)
AT1G16670	2.27303	1.76413e-22	AT1G16670	Protein kinase superfamily protein;(source:Araport11)
AT1G16720	-0.963071	1.32017e-05	HCF173	high chlorophyll fluorescence phenotype 173;(source:Araport11)
AT1G16730	-2.73303	0.000877932	UP6	hypothetical protein;(source:Araport11)
AT1G16840	0.581799	0.000525914	AT1G16840	hypothetical protein;(source:Araport11)
AT1G16880	-1.02335	1.22978e-11	ACR11	uridylyltransferase-like protein;(source:Araport11)
AT1G16890	0.526762	0.00384158	UBC36	ubiquitin-conjugating enzyme 36;(source:Araport11)
AT1G16900	0.541149	0.0344771	EBS3	Alg9-like mannosyltransferase family;(source:Araport11)
AT1G16920	-1.01745	0.0021544	RABA1b	RAB GTPase homolog A1B;(source:Araport11)
AT1G17010	-2.52573	0.0260573	AT1G17010	2-oxoglutarate (2OG) and Fe(II)-dependent oxygenase superfamily protein;(source:Araport11)
AT1G17020	1.14499	0.00204195	SRG1	senescence-related gene 1;(source:Araport11)
AT1G17100	-0.618848	0.0456216	HBP1	SOUL heme-binding family protein;(source:Araport11)
AT1G17147	1.35047	0.0037435	AT1G17147	VQ motif-containing protein;(source:Araport11)
AT1G17160	0.469358	0.0376778	AT1G17160	pfkB-like carbohydrate kinase family protein;(source:Araport11)
AT1G17170	1.35854	0.00428787	GSTU24	glutathione S-transferase TAU 24;(source:Araport11)
AT1G17180	1.12784	0.00677368	GSTU25	glutathione S-transferase TAU 25;(source:Araport11)
AT1G17190	-1.85943	9.78188e-10	GSTU26	glutathione S-transferase tau 26;(source:Araport11)
AT1G17200	-1.80803	1.12935e-19	AT1G17200	Uncharacterized protein family (UPF0497);(source:Araport11)
AT1G17220	-0.745079	2.68074e-07	FUG1	Translation initiation factor 2, small GTP-binding protein;(source:Araport11)
AT1G17230	0.995931	0.00109139	AT1G17230	Leucine-rich receptor-like protein kinase family protein;(source:Araport11)
AT1G17240	1.86023	3.80122e-06	RLP2	receptor like protein 2;(source:Araport11)
AT1G17250	2.87056	6.4632e-16	RLP3	receptor like protein 3;(source:Araport11)
AT1G17285	-2.14076	0.0040192	AT1G17285	transmembrane protein;(source:Araport11)
AT1G17290	1.43084	2.40895e-14	AlaAT1	alanine aminotransferas;(source:Araport11)
AT1G17300	-1.23454	0.0278678	AT1G17300	hypothetical protein;(source:Araport11)
AT1G17310	6.33517	1.54004e-20	AT1G17310	MADS-box transcription factor family protein;(source:Araport11)
AT1G17330	1.38684	6.28102e-10	AT1G17330	Metal-dependent phosphohydrolase;(source:Araport11)
AT1G17360	0.711934	0.00247255	AT1G17360	LOW protein: protein phosphatase 1 regulatory subunit-like protein;(source:Araport11)
AT1G17380	6.20091	6.01556e-76	JAZ5	jasmonate-zim-domain protein 5;(source:Araport11)
AT1G17420	3.17077	6.58188e-35	LOX3	lipoxygenase 3;(source:Araport11)
AT1G17440	0.536497	0.00422095	EER4	Transcription initiation factor TFIID subunit A;(source:Araport11)
AT1G17455	-0.681788	0.0431771	ELF4-L4	ELF4-like 4;(source:Araport11)
AT1G17500	1.13495	1.37651e-08	AT1G17500	ATPase E1-E2 type family protein / haloacid dehalogenase-like hydrolase family protein;(source:Araport11)
AT1G17550	0.877602	7.35524e-06	HAB2	homology to ABI2;(source:Araport11)
AT1G17600	2.17926	0.00460695	AT1G17600	Disease resistance protein (TIR-NBS-LRR class) family;(source:Araport11)
AT1G17650	-1.21952	2.21699e-05	GLYR2	glyoxylate reductase 2;(source:Araport11)
AT1G17744	3.27362	3.87497e-07	AT1G17744	hypothetical protein;(source:Araport11)
AT1G17745	2.90951	2.92807e-42	PGDH	D-3-phosphoglycerate dehydrogenase;(source:Araport11)
AT1G17750	2.26244	5.06555e-14	PEPR2	PEP1 receptor 2;(source:Araport11)
AT1G17780	0.621675	0.0126312	AT1G17780	transmembrane protein;(source:Araport11)
AT1G17830	1.68637	0.000207837	AT1G17830	hypothetical protein (DUF789);(source:Araport11)
AT1G17850	-0.956919	0.000614699	AT1G17850	Rhodanese/Cell cycle control phosphatase superfamily protein;(source:Araport11)
AT1G17860	1.08928	0.0150258	AT1G17860	Kunitz family trypsin and protease inhibitor protein;(source:Araport11)
AT1G17890	0.389539	0.0479723	GER2	NAD(P)-binding Rossmann-fold superfamily protein;(source:Araport11)
AT1G17920	-1.46937	0.00370089	HDG12	homeodomain GLABROUS 12;(source:Araport11)
AT1G17940	-0.701406	0.00755075	AT1G17940	Endosomal targeting BRO1-like domain-containing protein;(source:Araport11)
AT1G18020	-0.610917	0.00116599	AT1G18020	FMN-linked oxidoreductases superfamily protein;(source:Araport11)
AT1G18060	-1.26958	6.94201e-07	AT1G18060	microbial collagenase;(source:Araport11)
AT1G18090	-0.948878	0.00719364	AT1G18090	5-3 exonuclease family protein;(source:Araport11)
AT1G18100	1.27423	3.3456e-06	E12A11	PEBP (phosphatidylethanolamine-binding protein) family protein;(source:Araport11)
AT1G18140	2.36891	2.33837e-06	LAC1	laccase 1;(source:Araport11)
AT1G18150	-0.614355	0.0101984	ATMPK8	Protein kinase superfamily protein;(source:Araport11)
AT1G18170	-0.71912	0.002566	AT1G18170	FKBP-like peptidyl-prolyl cis-trans isomerase family protein;(source:Araport11)
AT1G18193	-2.11426	0.014731	AT1G18193	hypothetical protein;(source:Araport11)
AT1G18210	1.01753	1.23471e-11	AT1G18210	Calcium-binding EF-hand family protein;(source:Araport11)
AT1G18250	-0.554305	0.046941	ATLP-1	Pathogenesis-related thaumatin superfamily protein;(source:Araport11)
AT1G18260	1.06917	2.44792e-08	EBS5	HCP-like superfamily protein;(source:Araport11)
AT1G18300	2.97806	5.92764e-24	NUDT4	nudix hydrolase homolog 4;(source:Araport11)
AT1G18330	-0.742332	0.0141168	EPR1	Homeodomain-like superfamily protein;(source:Araport11)
AT1G18390	2.42655	4.52275e-14	AT1G18390	Serine/Threonine kinase family catalytic domain protein;(source:Araport11)
AT1G18400	1.6904	2.59973e-11	BEE1	BR enhanced expression 1;(source:Araport11)
AT1G18480	0.893764	3.69907e-05	SLP2	Calcineurin-like metallo-phosphoesterase superfamily protein;(source:Araport11)
AT1G18485	-0.942011	0.00162125	AT1G18485	Pentatricopeptide repeat (PPR) superfamily protein;(source:Araport11)
AT1G18500	0.761463	1.97504e-06	MAML-4	methylthioalkylmalate synthase-like 4;(source:Araport11)
AT1G18560	0.784314	0.00919959	AT1G18560	BED zinc finger and hAT dimerization domain-containing protein;(source:Araport11)
AT1G18570	3.81724	1.17882e-74	MYB51	myb domain protein 51;(source:Araport11)
AT1G18590	4.74982	1.93974e-129	SOT17	sulfotransferase 17;(source:Araport11)
AT1G18600	0.791089	0.0264946	RBL12	RHOMBOID-like protein 12;(source:Araport11)
AT1G18650	-0.866068	0.0295619	PDCB3	plasmodesmata callose-binding protein 3;(source:Araport11)
AT1G18720	0.574799	0.00755075	AT1G18720	ER membrane protein, putative (DUF962);(source:Araport11)
AT1G18730	-1.23356	3.68446e-07	PnsB4	NDH dependent flow 6;(source:Araport11)
AT1G18740	2.11734	4.52842e-28	AT1G18740	ROH1, putative (DUF793);(source:Araport11)
AT1G18800	-0.479975	0.0312967	NRP2	NAP1-related protein 2;(source:Araport11)
AT1G18810	-1.03947	0.00406147	AT1G18810	phytochrome kinase substrate-like protein;(source:Araport11)
AT1G18830	5.91309	1.86503e-11	AT1G18830	Transducin/WD40 repeat-like superfamily protein;(source:Araport11)
AT1G18860	1.38081	0.0278331	WRKY61	WRKY DNA-binding protein 61;(source:Araport11)
AT1G18870	-0.804262	0.0161771	ICS2	isochorismate synthase 2;(source:Araport11)
AT1G18890	1.86556	4.2585e-25	CDPK1	calcium-dependent protein kinase 1;(source:Araport11)
AT1G18900	0.978371	8.46871e-05	AT1G18900	Pentatricopeptide repeat (PPR) superfamily protein;(source:Araport11)
AT1G18970	2.66383	0.00300149	GLP4	germin-like protein 4;(source:Araport11)
AT1G19020	4.45379	2.23154e-78	AT1G19020	CDP-diacylglycerol-glycerol-3-phosphate 3-phosphatidyltransferase;(source:Araport11)
AT1G19110	0.405265	0.0351648	AT1G19110	inter-alpha-trypsin inhibitor heavy chain-like protein;(source:Araport11)
AT1G19130	1.23524	6.29201e-09	AT1G19130	RmlC-like jelly roll fold protein;(source:Araport11)
AT1G19150	-1.53833	7.70004e-14	Lhca6	PSI type II chlorophyll a/b-binding protein (Lhca2*1);(source:Araport11)
AT1G19180	3.50981	1.88472e-54	JAZ1	jasmonate-zim-domain protein 1;(source:Araport11)
AT1G19190	2.20152	4.76167e-07	AT1G19190	alpha/beta-Hydrolases superfamily protein;(source:Araport11)
AT1G19200	1.60476	0.0133625	AT1G19200	cyclin-dependent kinase, putative (DUF581);(source:Araport11)
AT1G19250	2.50946	7.79689e-08	FMO1	flavin-dependent monooxygenase 1;(source:Araport11)
AT1G19270	0.678746	0.02634	DA1	DA1;(source:Araport11)
AT1G19310	0.946454	2.82734e-06	AT1G19310	RING/U-box superfamily protein;(source:Araport11)
AT1G19330	-0.570819	0.0296901	AT1G19330	histone deacetylase complex subunit;(source:Araport11)
AT1G19360	0.499062	0.00313262	RRA3	Nucleotide-diphospho-sugar transferase family protein;(source:Araport11)
AT1G19380	2.05699	4.55542e-13	AT1G19380	sugar, putative (DUF1195);(source:Araport11)
AT1G19450	-0.668949	0.0429309	AT1G19450	Major facilitator superfamily protein;(source:Araport11)
AT1G19490	-1.78881	0.00676855	AT1G19490	Basic-leucine zipper (bZIP) transcription factor family protein;(source:Araport11)
AT1G19510	-1.29327	0.0152296	RL5	RAD-like 5;(source:Araport11)
AT1G19530	1.52797	6.72619e-11	AT1G19530	DNA polymerase epsilon catalytic subunit A;(source:Araport11)
AT1G19610	2.24468	5.79081e-06	PDF1.4	defensin-like protein;(source:Araport11)
AT1G19660	0.866393	8.10625e-08	AT1G19660	Wound-responsive family protein;(source:Araport11)
AT1G19670	1.1374	0.00134106	CLH1	chlorophyllase 1;(source:Araport11)
AT1G19720	-0.549521	0.032886	AT1G19720	Pentatricopeptide repeat (PPR-like) superfamily protein;(source:Araport11)
AT1G19770	1.07185	5.73423e-05	PUP14	purine permease 14;(source:Araport11)
AT1G19850	1.21048	3.0633e-07	MP	Transcriptional factor B3 family protein / auxin-responsive factor AUX/IAA-like protein;(source:Araport11)
AT1G19900	-3.69308	1.22122e-05	AT1G19900	glyoxal oxidase-related protein;(source:Araport11)
AT1G19920	-0.44572	0.0218495	APS2	Pseudouridine synthase/archaeosine transglycosylase-like family protein;(source:Araport11)
AT1G20010	-0.44105	0.00113255	TUB5	tubulin beta-5 chain;(source:Araport11)
AT1G20020	-0.973645	0.00106488	FNR2	ferredoxin-NADP[+]-oxidoreductase 2;(source:Araport11)
AT1G20030	-0.995694	0.0030336	AT1G20030	Pathogenesis-related thaumatin superfamily protein;(source:Araport11)
AT1G20060	-0.994847	0.0425562	AT1G20060	ATP binding microtubule motor family protein;(source:Araport11)
AT1G20090	-0.559161	0.00576003	ROP2	RHO-related protein from plants 2;(source:Araport11)
AT1G20100	0.444307	0.0309652	AT1G20100	DNA ligase-like protein;(source:Araport11)
AT1G20110	0.760857	1.94578e-05	AT1G20110	RING/FYVE/PHD zinc finger superfamily protein;(source:Araport11)
AT1G20200	0.529476	0.00156441	EMB2719	PAM domain (PCI/PINT associated module) protein;(source:Araport11)
AT1G20310	2.29127	0.0118447	AT1G20310	syringolide-induced protein;(source:Araport11)
AT1G20340	-1.20705	1.08598e-07	DRT112	Cupredoxin superfamily protein;(source:Araport11)
AT1G20350	3.98996	8.35754e-06	TIM17-1	translocase inner membrane subunit 17-1;(source:Araport11)
AT1G20380	0.924481	0.025881	AT1G20380	Prolyl oligopeptidase family protein;(source:Araport11)
AT1G20450	0.790686	0.0456216	ERD10	Dehydrin family protein;(source:Araport11)
AT1G20460	0.599622	0.0159455	AT1G20460	NADH-ubiquinone oxidoreductase chain;(source:Araport11)
AT1G20510	2.48018	2.65722e-43	OPCL1	OPC-8:0 CoA ligase1;(source:Araport11)
AT1G20520	2.55597	0.0148042	AT1G20520	DUF241 domain protein, putative (DUF241);(source:Araport11)
AT1G20540	-0.662793	0.0155061	AT1G20540	Transducin/WD40 repeat-like superfamily protein;(source:Araport11)
AT1G20575	0.655245	0.00811896	DPMS1	Nucleotide-diphospho-sugar transferases superfamily protein;(source:Araport11)
AT1G20630	0.835737	4.68358e-05	CAT1	catalase 1;(source:Araport11)
AT1G20780	1.0702	7.32592e-05	SAUL1	senescence-associated E3 ubiquitin ligase 1;(source:Araport11)
AT1G20810	-0.86535	0.000320621	AT1G20810	FKBP-like peptidyl-prolyl cis-trans isomerase family protein;(source:Araport11)
AT1G20823	-1.51404	1.12207e-05	AT1G20823	RING/U-box superfamily protein;(source:Araport11)
AT1G20830	-0.484522	0.0478144	MCD1	multiple chloroplast division site 1;(source:Araport11)
AT1G20840	-0.63144	0.00118902	TMT1	tonoplast monosaccharide transporter1;(source:Araport11)
AT1G20900	0.526082	0.00792656	ESC	Putative AT-hook DNA-binding family protein;(source:Araport11)
AT1G20950	-0.660725	0.0295311	AT1G20950	Phosphofructokinase family protein;(source:Araport11)
AT1G20970	0.515291	0.0197031	AT1G20970	calponin-like domain protein;(source:Araport11)
AT1G20980	1.13851	9.88791e-08	SPL14	squamosa promoter binding protein-like 14;(source:Araport11)
AT1G20990	2.40071	0.0244873	AT1G20990	Cysteine/Histidine-rich C1 domain family protein;(source:Araport11)
AT1G21000	0.938423	0.00121194	AT1G21000	PLATZ transcription factor family protein;(source:Araport11)
AT1G21010	1.84343	7.80512e-08	AT1G21010	poly polymerase;(source:Araport11)
AT1G21050	1.20798	1.07361e-10	AT1G21050	MIZU-KUSSEI-like protein (Protein of unknown function, DUF617);(source:Araport11)
AT1G21065	-0.576518	0.00894428	AT1G21065	secondary thiamine-phosphate synthase enzyme;(source:Araport11)
AT1G21080	1.08551	5.43259e-05	AT1G21080	DNAJ heat shock N-terminal domain-containing protein;(source:Araport11)
AT1G21090	-0.941356	0.00105258	AT1G21090	Cupredoxin superfamily protein;(source:Araport11)
AT1G21100	5.32852	7.89093e-116	IGMT1	O-methyltransferase family protein;(source:Araport11)
AT1G21110	3.73549	1.55743e-25	IGMT3	O-methyltransferase family protein;(source:Araport11)
AT1G21120	5.49097	6.45077e-54	IGMT2	O-methyltransferase family protein;(source:Araport11)
AT1G21130	1.16734	2.57823e-06	IGMT4	O-methyltransferase family protein;(source:Araport11)
AT1G21150	-1.27564	0.0196427	AT1G21150	Mitochondrial transcription termination factor family protein;(source:Araport11)
AT1G21230	3.353	0.000665606	WAK5	wall associated kinase 5;(source:Araport11)
AT1G21240	6.60261	5.32942e-19	WAK3	wall associated kinase 3;(source:Araport11)
AT1G21250	4.88631	8.94498e-22	WAK1	cell wall-associated kinase;(source:Araport11)
AT1G21270	1.27632	3.00162e-05	WAK2	wall-associated kinase 2;(source:Araport11)
AT1G21310	2.20792	2.79996e-25	EXT3	extensin 3;(source:Araport11)
AT1G21313	2.2034	0.0157298	AT1G21313	transmembrane protein;(source:Araport11)
AT1G21320	2.59479	0.000994724	AT1G21320	nucleic acid/nucleotide binding protein;(source:Araport11)
AT1G21326	2.19238	3.52465e-14	AT1G21326	VQ motif-containing protein;(source:Araport11)
AT1G21370	0.717384	0.000851972	AT1G21370	transmembrane protein;(source:Araport11)
AT1G21380	0.664968	0.00301005	AT1G21380	Target of Myb protein 1;(source:Araport11)
AT1G21390	1.39609	0.000922192	emb2170	embryo defective 2170;(source:Araport11)
AT1G21400	1.16942	8.87003e-05	AT1G21400	Thiamin diphosphate-binding fold (THDP-binding) superfamily protein;(source:Araport11)
AT1G21410	1.3974	0.000161454	SKP2A	F-box/RNI-like superfamily protein;(source:Araport11)
AT1G21450	1.43117	4.20426e-06	SCL1	SCARECROW-like 1;(source:Araport11)
AT1G21460	-0.717476	0.00808444	SWEET1	Nodulin MtN3 family protein;(source:Araport11)
AT1G21500	-1.81637	2.89156e-12	AT1G21500	hypothetical protein;(source:Araport11)
AT1G21520	2.39244	8.28436e-07	AT1G21520	hypothetical protein;(source:Araport11)
AT1G21540	-1.90075	3.28699e-08	AT1G21540	AMP-dependent synthetase and ligase family protein;(source:Araport11)
AT1G21550	3.30518	3.36317e-12	AT1G21550	Calcium-binding EF-hand family protein;(source:Araport11)
AT1G21560	-1.20656	2.36995e-05	AT1G21560	hypothetical protein;(source:Araport11)
AT1G21590	0.718766	8.87003e-05	AT1G21590	kinase with adenine nucleotide alpha hydrolases-like domain-containing protein;(source:Araport11)
AT1G21630	0.423617	0.00530216	AT1G21630	Calcium-binding EF hand family protein;(source:Araport11)
AT1G21700	0.437841	0.012685	SWI3C	SWITCH/sucrose nonfermenting 3C;(source:Araport11)
AT1G21720	0.462641	0.00699472	PBC1	proteasome beta subunit C1;(source:Araport11)
AT1G21750	0.728228	1.72089e-07	PDIL1-1	PDI-like 1-1;(source:Araport11)
AT1G21830	0.709454	0.0094363	AT1G21830	hypothetical protein;(source:Araport11)
AT1G21880	-0.735374	2.23021e-05	LYM1	lysm domain GPI-anchored protein 1 precursor;(source:Araport11)
AT1G21890	1.83275	0.0340928	UMAMIT19	nodulin MtN21 /EamA-like transporter family protein;(source:Araport11)
AT1G21900	1.66646	1.14705e-17	p24delta5	emp24/gp25L/p24 family/GOLD family protein;(source:Araport11)
AT1G21920	0.493492	0.0114214	AT1G21920	Histone H3 K4-specific methyltransferase SET7/9 family protein;(source:Araport11)
AT1G21970	4.33994	8.41736e-06	LEC1	Histone superfamily protein;(source:Araport11)
AT1G21980	1.59301	6.01475e-13	PIP5K1	phosphatidylinositol-4-phosphate 5-kinase 1;(source:Araport11)
AT1G22020	0.538478	0.0119693	SHM6	serine hydroxymethyltransferase 6;(source:Araport11)
AT1G22110	1.90551	1.12763e-09	AT1G22110	structural constituent of ribosome;(source:Araport11)
AT1G22160	-1.08944	0.00258308	AT1G22160	senescence-associated family protein (DUF581);(source:Araport11)
AT1G22170	-0.97524	0.00781202	AT1G22170	Phosphoglycerate mutase family protein;(source:Araport11)
AT1G22180	1.9305	2.14857e-16	AT1G22180	Sec14p-like phosphatidylinositol transfer family protein;(source:Araport11)
AT1G22210	2.34242	0.0428046	TPPC	Haloacid dehalogenase-like hydrolase (HAD) superfamily protein;(source:Araport11)
AT1G22220	-1.38326	0.00847529	AUF2	F-box family protein;(source:Araport11)
AT1G22230	-0.964305	0.00674722	AT1G22230	nucleolar GTP-binding protein;(source:Araport11)
AT1G22280	1.41201	6.19085e-08	PAPP2C	phytochrome-associated protein phosphatase type 2C;(source:Araport11)
AT1G22300	0.481094	0.00735053	GRF10	general regulatory factor 10;(source:Araport11)
AT1G22330	-0.99057	6.56783e-07	AT1G22330	RNA-binding (RRM/RBD/RNP motifs) family protein;(source:Araport11)
AT1G22360	0.922142	1.06225e-05	UGT85A2	UDP-glucosyl transferase 85A2;(source:Araport11)
AT1G22370	-1.12001	0.00496572	UGT85A5	UDP-glucosyl transferase 85A5;(source:Araport11)
AT1G22400	1.79795	3.66988e-16	UGT85A1	UDP-Glycosyltransferase superfamily protein;(source:Araport11)
AT1G22410	2.52148	2.94141e-27	AT1G22410	Class-II DAHP synthetase family protein;(source:Araport11)
AT1G22430	-0.680163	7.05614e-05	AT1G22430	GroES-like zinc-binding dehydrogenase family protein;(source:Araport11)
AT1G22460	-1.72215	0.0165681	AT1G22460	O-fucosyltransferase family protein;(source:Araport11)
AT1G22500	1.19218	0.0128813	ATL15	RING/U-box superfamily protein;(source:Araport11)
AT1G22510	1.33595	7.37911e-06	AT1G22510	E3 ubiquitin-protein ligase RNF170-like protein (DUF 1232);(source:Araport11)
AT1G22530	-0.560588	0.000947943	PATL2	PATELLIN 2;(source:Araport11)
AT1G22550	-1.28209	2.24098e-05	AT1G22550	Major facilitator superfamily protein;(source:Araport11)
AT1G22590	-1.42115	2.83829e-09	AGL87	AGAMOUS-like 87;(source:Araport11)
AT1G22600	-2.48635	0.00339105	AT1G22600	Late embryogenesis abundant protein (LEA) family protein;(source:Araport11)
AT1G22610	0.528039	0.0011569	AT1G22610	C2 calcium/lipid-binding plant phosphoribosyltransferase family protein;(source:Araport11)
AT1G22630	-1.60075	2.83472e-08	AT1G22630	SSUH2-like protein;(source:Araport11)
AT1G22680	-2.03461	0.0380058	AT1G22680	hypothetical protein;(source:Araport11)
AT1G22690	-1.03571	0.0412527	AT1G22690	Gibberellin-regulated family protein;(source:Araport11)
AT1G22700	-0.988036	2.26754e-08	AT1G22700	Tetratricopeptide repeat (TPR)-like superfamily protein;(source:Araport11)
AT1G22710	0.710373	7.27376e-05	SUC2	sucrose-proton symporter 2;(source:Araport11)
AT1G22740	-1.67588	1.05965e-06	RABG3B	RAB GTPase homolog G3B;(source:Araport11)
AT1G22840	0.517016	0.000558379	CYTC-1	CYTOCHROME C-1;(source:Araport11)
AT1G22850	-0.646682	0.010243	AT1G22850	SNARE associated Golgi protein family;(source:Araport11)
AT1G22870	0.565968	0.00801113	AT1G22870	kinase family with ARM repeat domain-containing protein;(source:Araport11)
AT1G22880	-1.41908	0.0142401	CEL5	cellulase 5;(source:Araport11)
AT1G22890	1.68221	5.91713e-08	AT1G22890	transmembrane protein;(source:Araport11)
AT1G22930	1.30776	1.48623e-07	AT1G22930	T-complex protein 11;(source:Araport11)
AT1G22985	1.31757	0.00141334	CRF7	Integrase-type DNA-binding superfamily protein;(source:Araport11)
AT1G23000	-1.31794	0.00140641	AT1G23000	Heavy metal transport/detoxification superfamily protein;(source:Araport11)
AT1G23020	1.00827	0.000712758	FRO3	ferric reduction oxidase 3;(source:Araport11)
AT1G23040	0.814345	0.0025551	AT1G23040	hydroxyproline-rich glycoprotein family protein;(source:Araport11)
AT1G23060	1.28583	5.65432e-06	MDP40	hypothetical protein;(source:Araport11)
AT1G23070	-1.83475	0.029357	AT1G23070	organic solute transporter ostalpha protein (DUF300);(source:Araport11)
AT1G23090	-0.649232	0.0346049	AST91	sulfate transporter 91;(source:Araport11)
AT1G23120	2.11035	5.81062e-07	AT1G23120	Polyketide cyclase/dehydrase and lipid transport superfamily protein;(source:Araport11)
AT1G23150	1.40269	0.0285934	AT1G23150	hypothetical protein;(source:Araport11)
AT1G23200	-1.2496	0.0376206	AT1G23200	Plant invertase/pectin methylesterase inhibitor superfamily;(source:Araport11)
AT1G23205	-2.29993	5.28569e-05	AT1G23205	Plant invertase/pectin methylesterase inhibitor superfamily protein;(source:Araport11)
AT1G23220	0.984015	6.7417e-06	AT1G23220	Dynein light chain type 1 family protein;(source:Araport11)
AT1G23310	-0.607449	0.00613856	GGT1	glutamate:glyoxylate aminotransferase;(source:Araport11)
AT1G23400	-0.652237	0.000234945	CAF2	RNA-binding CRS1 / YhbY (CRM) domain-containing protein;(source:Araport11)
AT1G23410	-0.964246	0.00524061	AT1G23410	Ribosomal protein S27a / Ubiquitin family protein;(source:Araport11)
AT1G23440	0.707937	0.0276645	AT1G23440	Peptidase C15, pyroglutamyl peptidase I-like protein;(source:Araport11)
AT1G23550	3.43883	5.30813e-15	SRO2	similar to RCD one 2;(source:Araport11)
AT1G23560	1.36549	0.0108772	AT1G23560	OBP32pep, putative (DUF220);(source:Araport11)
AT1G23710	2.32796	5.98465e-26	AT1G23710	hypothetical protein (DUF1645);(source:Araport11)
AT1G23730	3.45386	5.16538e-19	BCA3	beta carbonic anhydrase 3;(source:Araport11)
AT1G23750	-1.68918	8.84418e-09	AT1G23750	Nucleic acid-binding, OB-fold-like protein;(source:Araport11)
AT1G23780	0.524189	0.0463782	AT1G23780	F-box family protein;(source:Araport11)
AT1G23800	1.16588	2.82698e-05	ALDH2B7	aldehyde dehydrogenase 2B7;(source:Araport11)
AT1G23830	1.83174	6.90166e-10	AT1G23830	transmembrane protein;(source:Araport11)
AT1G23840	1.72369	0.0122846	AT1G23840	transmembrane protein;(source:Araport11)
AT1G23850	1.04231	5.60661e-05	AT1G23850	transmembrane protein;(source:Araport11)
AT1G23950	0.651896	0.0016162	AT1G23950	hypothetical protein (DUF626);(source:Araport11)
AT1G23960	0.502541	0.00868008	AT1G23960	hypothetical protein (DUF626);(source:Araport11)
AT1G24020	-1.85279	2.38519e-08	MLP423	MLP-like protein 423;(source:Araport11)
AT1G24100	3.01966	1.1584e-56	UGT74B1	UDP-glucosyl transferase 74B1;(source:Araport11)
AT1G24140	6.45539	2.21988e-82	AT1G24140	Matrixin family protein;(source:Araport11)
AT1G24145	4.39608	4.39205e-31	AT1G24145	transmembrane protein;(source:Araport11)
AT1G24150	2.35951	3.83211e-20	FH4	formin homologue 4;(source:Araport11)
AT1G24180	0.417657	0.00552976	IAR4	Thiamin diphosphate-binding fold (THDP-binding) superfamily protein;(source:Araport11)
AT1G24190	0.623086	0.00655348	SNL3	SIN3-like 3;(source:Araport11)
AT1G24320	-2.30037	0.00718552	AT1G24320	Six-hairpin glycosidases superfamily protein;(source:Araport11)
AT1G24350	0.801225	8.03838e-05	AT1G24350	Acid phosphatase/vanadium-dependent haloperoxidase-related protein;(source:Araport11)
AT1G24420	-3.29495	6.89753e-05	AT1G24420	HXXXD-type acyl-transferase family protein;(source:Araport11)
AT1G24460	0.973509	5.29843e-12	TNO1	TGN-related, localized SYP41 interacting protein;(source:Araport11)
AT1G24560	0.483969	0.0147191	AT1G24560	paramyosin;(source:Araport11)
AT1G24575	2.03999	1.73967e-06	AT1G24575	DEAD-box ATP-dependent RNA helicase-like protein;(source:Araport11)
AT1G24625	0.731221	0.0031975	ZFP7	zinc finger protein 7;(source:Araport11)
AT1G24735	-1.9246	0.00286186	AT1G24735	S-adenosyl-L-methionine-dependent methyltransferases superfamily protein;(source:Araport11)
AT1G24880	-0.807657	0.00275438	LpxC2
AT1G25211	0.393632	0.0331737	AT1G25211	F-box family protein;(source:Araport11)
AT1G25220	4.55889	5.20469e-260	ASB1	anthranilate synthase beta subunit 1;(source:Araport11)
AT1G25250	-1.86314	0.00927807	IDD16	indeterminate(ID)-domain 16;(source:Araport11)
AT1G25260	-0.80475	0.000800694	AT1G25260	Ribosomal protein L10 family protein;(source:Araport11)
AT1G25275	0.995928	2.83829e-09	AT1G25275	thionin-like protein;(source:Araport11)
AT1G25280	0.492589	0.00381753	TLP10	tubby like protein 10;(source:Araport11)
AT1G25370	2.39634	2.80885e-16	AT1G25370	hypothetical protein (DUF1639);(source:Araport11)
AT1G25390	1.4772	1.13377e-17	AT1G25390	Protein kinase superfamily protein;(source:Araport11)
AT1G25400	1.78758	8.24141e-08	AT1G25400	transmembrane protein;(source:Araport11)
AT1G25540	0.887811	1.4862e-07	PFT1	phytochrome and flowering time regulatory protein (PFT1);(source:Araport11)
AT1G25682	0.64519	0.000324845	AT1G25682	coiled-coil protein (DUF572);(source:Araport11)
AT1G26100	-1.27082	0.0216924	AT1G26100	Cytochrome b561/ferric reductase transmembrane protein family;(source:Araport11)
AT1G26130	0.62704	0.0120138	AT1G26130	ATPase E1-E2 type family protein / haloacid dehalogenase-like hydrolase family protein;(source:Araport11)
AT1G26150	-0.783388	0.0264331	PERK10	proline-rich extensin-like receptor kinase 10;(source:Araport11)
AT1G26230	-1.37109	1.54055e-09	Cpn60beta4	TCP-1/cpn60 chaperonin family protein;(source:Araport11)
AT1G26240	9.42218	2.63426e-103	AT1G26240	Proline-rich extensin-like family protein;(source:Araport11)
AT1G26250	3.63786	2.31152e-06	AT1G26250	Proline-rich extensin-like family protein;(source:Araport11)
AT1G26255	3.20299	0.00242797	AT1G26255	hypothetical protein;(source:Araport11)
AT1G26360	-3.00253	0.00363747	MES13	methyl esterase 13;(source:Araport11)
AT1G26380	10.0933	1.26537e-241	AT1G26380	FAD-binding Berberine family protein;(source:Araport11)
AT1G26390	10.4436	5.68947e-89	AT1G26390	FAD-binding Berberine family protein;(source:Araport11)
AT1G26410	9.09088	1.8555e-107	AT1G26410	FAD-binding Berberine family protein;(source:Araport11)
AT1G26420	6.68165	2.62201e-61	AT1G26420	FAD-binding Berberine family protein;(source:Araport11)
AT1G26450	0.710044	0.0382494	AT1G26450	Carbohydrate-binding X8 domain superfamily protein;(source:Araport11)
AT1G26610	-2.42527	0.0264379	AT1G26610	C2H2-like zinc finger protein;(source:Araport11)
AT1G26620	0.436727	0.0493056	AT1G26620	T-box transcription factor, putative (DUF863);(source:Araport11)
AT1G26680	-2.78047	0.00161073	AT1G26680	transcriptional factor B3 family protein;(source:Araport11)
AT1G26690	1.379	1.52551e-07	AT1G26690	emp24/gp25L/p24 family/GOLD family protein;(source:Araport11)
AT1G26730	2.27453	0.000364873	AT1G26730	EXS (ERD1/XPR1/SYG1) family protein;(source:Araport11)
AT1G26761	-1.67451	0.00208485	AT1G26761	Arabinanase/levansucrase/invertase;(source:Araport11)
AT1G26770	1.65594	4.79366e-06	EXPA10	expansin A10;(source:Araport11)
AT1G26830	0.443074	0.0208813	CUL3	cullin 3;(source:Araport11)
AT1G26930	1.44125	5.51309e-08	AT1G26930	Galactose oxidase/kelch repeat superfamily protein;(source:Araport11)
AT1G26945	1.08666	0.000740653	KDR	basic helix-loop-helix (bHLH) DNA-binding superfamily protein;(source:Araport11)
AT1G26960	-0.942052	0.0166196	AtHB23	homeobox protein 23;(source:Araport11)
AT1G27000	0.84937	3.59915e-07	AT1G27000	GRIP/coiled-coil protein, putative (DUF1664);(source:Araport11)
AT1G27030	-0.454929	0.0105056	AT1G27030	hypothetical protein;(source:Araport11)
AT1G27050	-0.745551	0.00616407	AT1G27050	homeobox leucine zipper protein;(source:Araport11)
AT1G27100	0.681053	0.00716504	AT1G27100	Actin cross-linking protein;(source:Araport11)
AT1G27130	1.09006	4.51061e-11	GSTU13	glutathione S-transferase tau 13;(source:Araport11)
AT1G27140	-1.5167	0.001841	GSTU14	glutathione S-transferase tau 14;(source:Araport11)
AT1G27170	-1.07206	0.000981052	AT1G27170	transmembrane receptors / ATP binding protein;(source:Araport11)
AT1G27200	1.36706	4.24732e-14	AT1G27200	glycosyltransferase family protein (DUF23);(source:Araport11)
AT1G27300	0.598685	0.0380293	AT1G27300	transmembrane protein;(source:Araport11)
AT1G27320	0.57278	0.00103987	HK3	histidine kinase 3;(source:Araport11)
AT1G27330	1.24915	8.66332e-09	AT1G27330	Ribosome associated membrane protein RAMP4;(source:Araport11)
AT1G27350	1.43498	5.4357e-11	AT1G27350	Ribosome associated membrane protein RAMP4;(source:Araport11)
AT1G27360	-0.958652	0.0387273	SPL11	squamosa promoter-like 11;(source:Araport11)
AT1G27370	-1.19018	0.00313375	SPL10	squamosa promoter binding protein-like 10;(source:Araport11)
AT1G27380	-1.37462	0.0426574	RIC2	ROP-interactive CRIB motif-containing protein 2;(source:Araport11)
AT1G27400	-0.568603	0.0126682	AT1G27400	Ribosomal protein L22p/L17e family protein;(source:Araport11)
AT1G27460	-0.817843	0.000180668	NPGR1	no pollen germination related 1;(source:Araport11)
AT1G27470	-0.737538	0.0176862	AT1G27470	transducin family protein / WD-40 repeat family protein;(source:Araport11)
AT1G27480	-0.793152	0.00155693	AT1G27480	alpha/beta-Hydrolases superfamily protein;(source:Araport11)
AT1G27500	1.12747	0.000122918	KLCR3	Tetratricopeptide repeat (TPR)-like superfamily protein;(source:Araport11)
AT1G27565	-0.92704	0.0231188	AT1G27565	hypothetical protein;(source:Araport11)
AT1G27580	-4.84326	1.57639e-07	AT1G27580	F-box protein (DUF295);(source:Araport11)
AT1G27680	-0.83344	0.00341418	APL2	ADPGLC-PPase large subunit;(source:Araport11)
AT1G27720	2.18604	1.67587e-06	TAF4B	TBP-associated factor 4B;(source:Araport11)
AT1G27730	4.23089	1.56842e-47	STZ	salt tolerance zinc finger;(source:Araport11)
AT1G27760	0.657353	0.000369696	SAT32	interferon-related developmental regulator family protein / IFRD protein family;(source:Araport11)
AT1G27770	0.900909	1.54157e-06	ACA1	autoinhibited Ca2+-ATPase 1;(source:Araport11)
AT1G27950	-0.74536	1.21239e-05	LTPG1	glycosylphosphatidylinositol-anchored lipid protein transfer 1;(source:Araport11)
AT1G27970	0.688366	1.63358e-05	NTF2B	nuclear transport factor 2B;(source:Araport11)
AT1G27980	1.02439	0.0244928	DPL1	dihydrosphingosine phosphate lyase;(source:Araport11)
AT1G28050	0.467269	0.0369492	BBX13	B-box type zinc finger protein with CCT domain-containing protein;(source:Araport11)
AT1G28100	-0.847331	0.00930081	AT1G28100	hypothetical protein;(source:Araport11)
AT1G28150	-0.776286	0.00902357	AT1G28150	hypothetical protein;(source:Araport11)
AT1G28180	4.50841	2.85119e-06	AT1G28180	DEAD-box ATP-dependent RNA helicase-like protein;(source:Araport11)
AT1G28190	3.88774	2.2446e-119	AT1G28190	hypothetical protein;(source:Araport11)
AT1G28200	1.33394	7.45061e-08	FIP1	FH interacting protein 1;(source:Araport11)
AT1G28230	1.18032	2.81695e-07	PUP1	purine permease 1;(source:Araport11)
AT1G28240	1.08935	3.46929e-05	AT1G28240	strawberry notch protein (DUF616);(source:Araport11)
AT1G28280	1.08593	4.66254e-07	AT1G28280	VQ motif-containing protein;(source:Araport11)
AT1G28290	-0.774821	0.000984003	AGP31	arabinogalactan protein 31;(source:Araport11)
AT1G28320	0.478364	0.0405215	DEG15	protease-like protein;(source:Araport11)
AT1G28330	-0.312844	0.0222861	DYL1	dormancy-associated protein-like 1;(source:Araport11)
AT1G28370	2.94679	0.00446169	ERF11	ERF domain protein 11;(source:Araport11)
AT1G28380	1.76813	2.30856e-13	NSL1	MAC/Perforin domain-containing protein;(source:Araport11)
AT1G28390	1.60825	6.59505e-08	AT1G28390	Protein kinase superfamily protein;(source:Araport11)
AT1G28395	-0.782555	0.00336343	AT1G28395	hypothetical protein;(source:Araport11)
AT1G28440	-0.430452	0.00522798	HSL1	HAESA-like 1;(source:Araport11)
AT1G28470	-1.3642	0.000826169	NAC010	NAC domain containing protein 10;(source:Araport11)
AT1G28480	2.66241	1.32217e-07	GRX480	Thioredoxin superfamily protein;(source:Araport11)
AT1G28520	0.928305	9.49942e-05	VOZ1	vascular plant one zinc finger protein;(source:Araport11)
AT1G28570	-0.93879	0.00398792	AT1G28570	SGNH hydrolase-type esterase superfamily protein;(source:Araport11)
AT1G28600	1.36879	0.000177938	AT1G28600	GDSL-like Lipase/Acylhydrolase superfamily protein;(source:Araport11)
AT1G28650	-3.08597	0.00225846	AT1G28650	GDSL-like Lipase/Acylhydrolase superfamily protein;(source:Araport11)
AT1G28660	-0.414507	0.0156065	AT1G28660	GDSL-like Lipase/Acylhydrolase superfamily protein;(source:Araport11)
AT1G28670	-0.735615	0.00198468	ARAB-1	GDSL-like Lipase/Acylhydrolase superfamily protein;(source:Araport11)
AT1G28680	0.78186	0.00351789	AT1G28680	HXXXD-type acyl-transferase family protein;(source:Araport11)
AT1G29000	-1.48043	0.00862391	AT1G29000	Heavy metal transport/detoxification superfamily protein;(source:Araport11)
AT1G29020	-2.97421	9.26261e-06	AT1G29020	Calcium-binding EF-hand family protein;(source:Araport11)
AT1G29025	-1.32268	0.0140957	AT1G29025	Calcium-binding EF-hand family protein;(source:Araport11)
AT1G29060	1.84622	1.33513e-14	AT1G29060	Target SNARE coiled-coil domain protein;(source:Araport11)
AT1G29070	-1.34425	4.52072e-07	AT1G29070	Ribosomal protein L34;(source:Araport11)
AT1G29090	-3.15949	9.26766e-09	AT1G29090	Cysteine proteinases superfamily protein;(source:Araport11)
AT1G29120	0.945806	3.61985e-05	AT1G29120	Hydrolase-like protein family;(source:Araport11)
AT1G29150	0.694273	1.10089e-07	ATS9	non-ATPase subunit 9;(source:Araport11)
AT1G29170	-0.905196	0.00205659	WAVE2	SCAR family protein;(source:Araport11)
AT1G29195	0.990767	0.00134375	AT1G29195	phosphatidylinositol 4-phosphate 5-kinase MSS4-like protein;(source:Araport11)
AT1G29240	-0.852635	0.0116308	AT1G29240	transcription initiation factor TFIID subunit, putative (DUF688);(source:Araport11)
AT1G29250	-0.68439	0.00210159	AT1G29250	Alba DNA/RNA-binding protein;(source:Araport11)
AT1G29290	4.13627	9.79177e-17	AT1G29290	B-cell lymphoma 6 protein;(source:Araport11)
AT1G29300	1.05684	5.58303e-06	UNE1	intracellular protein transporter, putative (DUF641);(source:Araport11)
AT1G29310	2.0286	6.94249e-21	AT1G29310	SecY protein transport family protein;(source:Araport11)
AT1G29320	-0.604126	0.0258406	AT1G29320	Transducin/WD40 repeat-like superfamily protein;(source:Araport11)
AT1G29330	0.489527	0.0460832	ERD2	ER lumen protein retaining receptor family protein;(source:Araport11)
AT1G29340	0.78779	9.03061e-05	PUB17	plant U-box 17;(source:Araport11)
AT1G29390	-0.453094	0.0479723	COR314-TM2	cold regulated 314 thylakoid membrane 2;(source:Araport11)
AT1G29530	-1.08109	0.000285517	AT1G29530	hypothetical protein;(source:Araport11)
AT1G29640	1.48703	9.34934e-07	AT1G29640	senescence regulator (Protein of unknown function, DUF584);(source:Araport11)
AT1G29670	-0.993519	0.000583579	AT1G29670	GDSL-like Lipase/Acylhydrolase superfamily protein;(source:Araport11)
AT1G29690	1.60027	2.23155e-19	CAD1	MAC/Perforin domain-containing protein;(source:Araport11)
AT1G29720	-3.92247	1.16628e-06	AT1G29720	Leucine-rich repeat transmembrane protein kinase;(source:Araport11)
AT1G29760	1.09717	6.02974e-08	AT1G29760	Putative adipose-regulatory protein (Seipin);(source:Araport11)
AT1G29800	0.865672	0.013864	AT1G29800	RING/FYVE/PHD-type zinc finger family protein;(source:Araport11)
AT1G29860	4.61809	3.0102e-12	WRKY71	WRKY DNA-binding protein 71;(source:Araport11)
AT1G29910	-1.38476	9.06372e-25	CAB3	chlorophyll A/B binding protein 3;(source:Araport11)
AT1G29920	-1.82542	1.0905e-12	CAB2	chlorophyll A/B-binding protein 2;(source:Araport11)
AT1G29930	-0.919285	6.90482e-07	CAB1	chlorophyll A/B binding protein 1;(source:Araport11)
AT1G29970	0.771854	0.000180936	RPL18AA	60S ribosomal protein L18A-1;(source:Araport11)
AT1G29980	-0.758534	0.035799	AT1G29980	choice-of-anchor C domain protein, putative (Protein of unknown function, DUF642);(source:Araport11)
AT1G30000	0.787083	8.66261e-06	MNS3	alpha-mannosidase 3;(source:Araport11)
AT1G30040	1.3238	4.69321e-06	GA2OX2	gibberellin 2-oxidase;(source:Araport11)
AT1G30050	-3.03	0.00504683	AT1G30050	tropomyosin;(source:Araport11)
AT1G30070	0.686688	0.0222549	AT1G30070	SGS domain-containing protein;(source:Araport11)
AT1G30090	0.599489	0.0128917	AT1G30090	Galactose oxidase/kelch repeat superfamily protein;(source:Araport11)
AT1G30110	-1.01526	0.00697328	NUDX25	nudix hydrolase homolog 25;(source:Araport11)
AT1G30120	-0.438767	0.0421792	PDH-E1 BETA	pyruvate dehydrogenase E1 beta;(source:Araport11)
AT1G30135	6.03962	5.19625e-22	JAZ8	jasmonate-zim-domain protein 8;(source:Araport11)
AT1G30200	-0.380283	0.0424777	AT1G30200	F-box family protein;(source:Araport11)
AT1G30210	-0.514137	0.00322007	TCP24	TEOSINTE BRANCHED 1, cycloidea, and PCF family 24;(source:Araport11)
AT1G30220	1.62489	0.000114539	INT2	inositol transporter 2;(source:Araport11)
AT1G30260	-1.41295	0.00233276	AT1G30260	galactosyltransferase family protein;(source:Araport11)
AT1G30270	1.1241	2.80173e-05	CIPK23	CBL-interacting protein kinase 23;(source:Araport11)
AT1G30280	-1.03282	0.0258114	AT1G30280	Chaperone DnaJ-domain superfamily protein;(source:Araport11)
AT1G30300	0.595598	0.0498597	AT1G30300	Metallo-hydrolase/oxidoreductase superfamily protein;(source:Araport11)
AT1G30360	-0.814911	7.1569e-05	ERD4	Early-responsive to dehydration stress protein (ERD4);(source:Araport11)
AT1G30370	4.83027	5.45726e-21	DLAH	alpha/beta-Hydrolases superfamily protein;(source:Araport11)
AT1G30380	-1.5028	5.02624e-29	PSAK	photosystem I subunit K;(source:Araport11)
AT1G30410	-0.960081	0.0414176	ABCC12	multidrug resistance-associated protein 13;(source:Araport11)
AT1G30420	2.60238	4.33273e-07	ABCC11	multidrug resistance-associated protein 12;(source:Araport11)
AT1G30450	0.651742	6.6773e-05	CCC1	cation-chloride co-transporter 1;(source:Araport11)
AT1G30510	-1.80162	2.93346e-07	RFNR2	root FNR 2;(source:Araport11)
AT1G30520	-2.07552	5.78816e-17	AAE14	acyl-activating enzyme 14;(source:Araport11)
AT1G30530	-1.07773	0.000284795	UGT78D1	UDP-glucosyl transferase 78D1;(source:Araport11)
AT1G30550	-2.2696	0.00949705	AT1G30550	S-adenosyl-L-methionine-dependent methyltransferase superfamily protein;(source:Araport11)
AT1G30590	-0.779956	0.0421762	AT1G30590	RNA polymerase I specific transcription initiation factor RRN3 protein;(source:Araport11)
AT1G30600	-0.721474	0.0138031	AT1G30600	Subtilase family protein;(source:Araport11)
AT1G30620	2.42039	1.27721e-32	MUR4	NAD(P)-binding Rossmann-fold superfamily protein;(source:Araport11)
AT1G30640	1.13333	0.000917654	AT1G30640	Protein kinase family protein;(source:Araport11)
AT1G30700	3.26374	1.59214e-06	AT1G30700	FAD-binding Berberine family protein;(source:Araport11)
AT1G30720	2.92642	1.55532e-15	AT1G30720	FAD-binding Berberine family protein;(source:Araport11)
AT1G30730	3.95765	4.38274e-25	AT1G30730	FAD-binding Berberine family protein;(source:Araport11)
AT1G30740	3.40168	5.421e-05	AT1G30740	FAD-binding Berberine family protein;(source:Araport11)
AT1G30755	2.50941	2.74751e-12	AT1G30755	elongation factor G, putative (DUF668);(source:Araport11)
AT1G30757	2.06936	7.72879e-06	AT1G30757	transmembrane protein;(source:Araport11)
AT1G30810	0.674	0.00185923	JMJ18	Transcription factor jumonji (jmj) family protein / zinc finger (C5HC2 type) family protein;(source:Araport11)
AT1G30840	-2.19372	2.44432e-06	PUP4	purine permease 4;(source:Araport11)
AT1G30850	-1.81546	0.0451242	RSH4	root hair specific 4;(source:Araport11)
AT1G30870	-2.41483	1.57384e-06	AT1G30870	Peroxidase superfamily protein;(source:Araport11)
AT1G30880	-0.673863	0.0233353	AT1G30880	hypothetical protein;(source:Araport11)
AT1G30910	-0.525619	0.0406946	AT1G30910	Molybdenum cofactor sulfurase family protein;(source:Araport11)
AT1G31070	-0.989609	5.45225e-05	GlcNAc1pUT1	N-acetylglucosamine-1-phosphate uridylyltransferase 1;(source:Araport11)
AT1G31120	0.689018	0.0253056	KUP10	K+ uptake permease 10;(source:Araport11)
AT1G31130	2.3988	1.14297e-35	AT1G31130	polyadenylate-binding protein 1-B-binding protein;(source:Araport11)
AT1G31190	-0.57584	0.0376193	IMPL1	myo-inositol monophosphatase like 1;(source:Araport11)
AT1G31330	-1.64006	5.31094e-12	PSAF	photosystem I subunit F;(source:Araport11)
AT1G31335	-1.38199	0.000822212	AT1G31335	transmembrane protein;(source:Araport11)
AT1G31340	0.974004	1.93228e-05	RUB1	related to ubiquitin 1;(source:Araport11)
AT1G31350	0.869028	0.00336166	KUF1	KAR-UP F-box 1;(source:Araport11)
AT1G31420	-0.79253	3.86091e-06	FEI1	Leucine-rich repeat protein kinase family protein;(source:Araport11)
AT1G31470	0.798052	0.0168866	NFD4	Major facilitator superfamily protein;(source:Araport11)
AT1G31490	-2.54661	0.00874767	AT1G31490	HXXXD-type acyl-transferase family protein;(source:Araport11)
AT1G31540	1.50895	5.23272e-06	AT1G31540	Disease resistance protein (TIR-NBS-LRR class) family;(source:Araport11)
AT1G31550	1.39629	0.000798063	AT1G31550	GDSL-like Lipase/Acylhydrolase superfamily protein;(source:Araport11)
AT1G31770	-0.647023	0.00883129	ABCG14	ATP-binding cassette 14;(source:Araport11)
AT1G31780	0.543599	0.00944796	AT1G31780	oligomeric golgi complex subunit;(source:Araport11)
AT1G31800	-0.86182	0.00123946	CYP97A3	cytochrome P450, family 97, subfamily A, polypeptide 3;(source:Araport11)
AT1G31820	1.23409	0.000868779	PUT1	Amino acid permease family protein;(source:Araport11)
AT1G31835	-1.507	0.0402057	AT1G31835	hypothetical protein;(source:Araport11)
AT1G31860	-0.990179	0.00386162	AT-IE	histidine biosynthesis bifunctional protein (HISIE);(source:Araport11)
AT1G31880	1.46051	0.000366784	BRX	DZC (Disease resistance/zinc finger/chromosome condensation-like region) domain containing protein;(source:Araport11)
AT1G31930	1.79641	1.02826e-27	XLG3	extra-large GTP-binding protein 3;(source:Araport11)
AT1G31950	-2.72516	7.87576e-14	AT1G31950	Terpenoid cyclases/Protein prenyltransferases superfamily protein;(source:Araport11)
AT1G32060	-1.23089	5.18921e-11	PRK	phosphoribulokinase;(source:Araport11)
AT1G32080	-0.938374	7.83757e-08	LrgB	membrane protein;(source:Araport11)
AT1G32090	0.808128	1.63414e-05	AT1G32090	early-responsive to dehydration stress protein (ERD4);(source:Araport11)
AT1G32100	1.17574	0.00356369	PRR1	pinoresinol reductase 1;(source:Araport11)
AT1G32170	1.17175	0.0017381	XTH30	xyloglucan endotransglucosylase/hydrolase 30;(source:Araport11)
AT1G32190	-0.908906	0.0014968	AT1G32190	alpha/beta-Hydrolases superfamily protein;(source:Araport11)
AT1G32200	-0.431808	0.042419	ATS1	phospholipid/glycerol acyltransferase family protein;(source:Araport11)
AT1G32220	-0.60708	0.0039169	AT1G32220	NAD(P)-binding Rossmann-fold superfamily protein;(source:Araport11)
AT1G32330	0.649732	0.00175735	HSFA1D	heat shock transcription factor A1D;(source:Araport11)
AT1G32340	0.660301	0.00274386	NHL8	NDR1/HIN1-like 8;(source:Araport11)
AT1G32350	10.0281	3.22481e-95	AOX1D	alternative oxidase 1D;(source:Araport11)
AT1G32440	-0.591275	0.0131402	PKp3	plastidial pyruvate kinase 3;(source:Araport11)
AT1G32450	-0.98382	0.00312885	NRT1.5	nitrate transporter 1.5;(source:Araport11)
AT1G32460	0.633658	0.0194128	AT1G32460	hypothetical protein;(source:Araport11)
AT1G32470	-1.62973	2.6435e-18	AT1G32470	Single hybrid motif superfamily protein;(source:Araport11)
AT1G32530	1.07419	3.39739e-07	AT1G32530	RING/U-box superfamily protein;(source:Araport11)
AT1G32550	-0.727505	0.00178783	FdC2	2Fe-2S ferredoxin-like superfamily protein;(source:Araport11)
AT1G32583	-1.2685	0.0394333	AT1G32583	tapetum determinant protein;(source:Araport11)
AT1G32640	1.02937	1.98765e-06	MYC2	Basic helix-loop-helix (bHLH) DNA-binding family protein;(source:Araport11)
AT1G32690	1.18504	0.000142598	AT1G32690	DUF740 family protein;(source:Araport11)
AT1G32700	0.798641	0.00429664	AT1G32700	PLATZ transcription factor family protein;(source:Araport11)
AT1G32790	0.482038	0.0116059	CID11	CTC-interacting domain 11;(source:Araport11)
AT1G32870	1.6413	2.12836e-09	NAC13	NAC domain protein 13;(source:Araport11)
AT1G32920	1.09296	1.35351e-08	AT1G32920	hypothetical protein;(source:Araport11)
AT1G32928	1.41964	0.00719364	AT1G32928	Avr9/Cf-9 rapidly elicited protein;(source:Araport11)
AT1G32940	2.05321	6.85674e-11	SBT3.5	Subtilase family protein;(source:Araport11)
AT1G32960	7.89816	9.01326e-71	SBT3.3	Subtilase family protein;(source:Araport11)
AT1G32990	-0.990347	2.41817e-08	PRPL11	plastid ribosomal protein l11;(source:Araport11)
AT1G33030	6.36666	2.43099e-49	AT1G33030	O-methyltransferase family protein;(source:Araport11)
AT1G33040	-1.24234	2.41651e-06	NACA5	nascent polypeptide-associated complex subunit alpha-like protein 5;(source:Araport11)
AT1G33110	1.70308	7.81611e-25	AT1G33110	MATE efflux family protein;(source:Araport11)
AT1G33260	1.00434	0.0169564	AT1G33260	Protein kinase superfamily protein;(source:Araport11)
AT1G33265	-1.00491	0.0141071	AT1G33265	Transmembrane proteins 14C;(source:Araport11)
AT1G33290	-0.726335	0.00164531	AT1G33290	P-loop containing nucleoside triphosphate hydrolases superfamily protein;(source:Araport11)
AT1G33320	-2.32779	0.0442096	AT1G33320	Pyridoxal phosphate (PLP)-dependent transferases superfamily protein;(source:Araport11)
AT1G33400	-0.697658	0.0286629	TPR9	Tetratricopeptide repeat (TPR)-like superfamily protein;(source:Araport11)
AT1G33470	-0.594574	0.000472083	AT1G33470	RNA-binding (RRM/RBD/RNP motifs) family protein;(source:Araport11)
AT1G33490	0.729354	0.000332168	AT1G33490	E3 ubiquitin-protein ligase;(source:Araport11)
AT1G33540	-2.45565	0.0165201	scpl18	serine carboxypeptidase-like 18;(source:Araport11)
AT1G33560	1.26202	3.23123e-09	ADR1	Disease resistance protein (CC-NBS-LRR class) family;(source:Araport11)
AT1G33590	2.03374	1.76873e-25	AT1G33590	Leucine-rich repeat (LRR) family protein;(source:Araport11)
AT1G33600	1.84806	2.51088e-09	AT1G33600	Leucine-rich repeat (LRR) family protein;(source:Araport11)
AT1G33610	1.06862	0.00698157	AT1G33610	Leucine-rich repeat (LRR) family protein;(source:Araport11)
AT1G33670	-2.37292	0.0396285	AT1G33670	Leucine-rich repeat (LRR) family protein;(source:Araport11)
AT1G33700	-0.889391	0.0438811	AT1G33700	Beta-glucosidase, GBA2 type family protein;(source:Araport11)
AT1G33750	-1.56384	8.32731e-05	AT1G33750	Terpenoid cyclases/Protein prenyltransferases superfamily protein;(source:Araport11)
AT1G33770	1.97512	0.000397925	AT1G33770	Protein kinase superfamily protein;(source:Araport11)
AT1G33810	-0.813181	0.000186368	AT1G33810	zinc finger/BTB domain protein;(source:Araport11)
AT1G33840	3.53627	0.000815114	AT1G33840	LURP-one-like protein (DUF567);(source:Araport11)
AT1G33960	3.63431	1.24514e-21	AIG1	P-loop containing nucleoside triphosphate hydrolases superfamily protein;(source:Araport11)
AT1G34000	-1.26184	7.01401e-08	OHP2	one-helix protein 2;(source:Araport11)
AT1G34010	-0.711067	0.048425	AT1G34010	hypothetical protein;(source:Araport11)
AT1G34040	-2.09251	0.000113503	AT1G34040	Pyridoxal phosphate (PLP)-dependent transferases superfamily protein;(source:Araport11)
AT1G34047	1.85354	0.030486	AT1G34047	Defensin-like (DEFL) family protein;(source:Araport11)
AT1G34060	-1.15583	0.00450049	AT1G34060	Pyridoxal phosphate (PLP)-dependent transferases superfamily protein;(source:Araport11)
AT1G34180	2.52303	9.73218e-16	NAC016	NAC domain containing protein 16;(source:Araport11)
AT1G34190	0.580526	0.0256412	NAC017	NAC domain containing protein 17;(source:Araport11)
AT1G34200	0.697214	0.00128831	AT1G34200	Glyceraldehyde-3-phosphate dehydrogenase-like family protein;(source:Araport11)
AT1G34220	0.771575	0.000365434	AT1G34220	Regulator of Vps4 activity in the MVB pathway protein;(source:Araport11)
AT1G34260	0.813138	0.00244995	FAB1D	FORMS APLOID AND BINUCLEATE CELLS 1A;(source:Araport11)
AT1G34300	0.876083	2.04715e-05	AT1G34300	lectin protein kinase family protein;(source:Araport11)
AT1G34370	1.17328	4.82783e-08	STOP1	C2H2 and C2HC zinc fingers superfamily protein;(source:Araport11)
AT1G34420	1.24488	0.0178014	AT1G34420	leucine-rich repeat transmembrane protein kinase family protein;(source:Araport11)
AT1G34510	-2.22707	0.00817977	AT1G34510	Peroxidase superfamily protein;(source:Araport11)
AT1G34540	-2.38918	0.0380058	CYP94D1	cytochrome P450, family 94, subfamily D, polypeptide 1;(source:Araport11)
AT1G34750	1.12134	0.00360347	AT1G34750	Protein phosphatase 2C family protein;(source:Araport11)
AT1G34760	-0.624606	0.00167319	GRF11	general regulatory factor 11;(source:Araport11)
AT1G35140	2.04668	1.03166e-10	PHI-1	Phosphate-responsive 1 family protein;(source:Araport11)
AT1G35190	1.11601	4.48085e-09	AT1G35190	2-oxoglutarate (2OG) and Fe(II)-dependent oxygenase superfamily protein;(source:Araport11)
AT1G35210	4.57841	2.70209e-35	AT1G35210	hypothetical protein;(source:Araport11)
AT1G35230	6.20693	3.91373e-144	AGP5	arabinogalactan protein 5;(source:Araport11)
AT1G35250	-1.26743	0.0052176	AT1G35250	Thioesterase superfamily protein;(source:Araport11)
AT1G35290	-2.31018	0.0149725	AT1G35290	Thioesterase superfamily protein;(source:Araport11)
AT1G35350	1.79154	2.52343e-14	AT1G35350	EXS (ERD1/XPR1/SYG1) family protein;(source:Araport11)
AT1G35516	-1.14412	0.000149401	AT1G35516	myb-like transcription factor family protein;(source:Araport11)
AT1G35670	1.68642	7.83306e-07	CDPK2	calcium-dependent protein kinase 2;(source:Araport11)
AT1G35680	-0.891747	4.05575e-06	RPL21C	Ribosomal protein L21;(source:Araport11)
AT1G35710	3.96515	6.63085e-20	AT1G35710	kinase family with leucine-rich repeat domain-containing protein;(source:Araport11)
AT1G35910	2.20199	0.0101729	TPPD	Haloacid dehalogenase-like hydrolase (HAD) superfamily protein;(source:Araport11)
AT1G36050	0.430772	0.00905429	AT1G36050	Endoplasmic reticulum vesicle transporter protein;(source:Araport11)
AT1G36622	5.34183	2.70614e-65	AT1G36622	transmembrane protein;(source:Araport11)
AT1G36640	3.18259	7.49618e-40	AT1G36640	transmembrane protein;(source:Araport11)
AT1G36980	-0.618046	0.018806	AT1G36980	transmembrane 50A-like protein;(source:Araport11)
AT1G37130	3.14728	2.6295e-22	NIA2	nitrate reductase 2;(source:Araport11)
AT1G38065	-1.74818	0.000454583	AT1G38065	O-fucosyltransferase family protein;(source:Araport11)
AT1G42430	-0.874552	0.000443569	AT1G42430	inactive purple acid phosphatase-like protein;(source:Araport11)
AT1G42440	-0.420681	0.0314798	AT1G42440	pre-rRNA-processing TSR1-like protein;(source:Araport11)
AT1G42540	0.742669	0.00162693	GLR3.3	glutamate receptor 3.3;(source:Araport11)
AT1G42550	-0.698162	0.0321846	PMI1	plastid movement impaired1;(source:Araport11)
AT1G42970	-1.26554	4.6426e-25	GAPB	glyceraldehyde-3-phosphate dehydrogenase B subunit;(source:Araport11)
AT1G42990	2.4731	1.86805e-34	BZIP60	basic region/leucine zipper motif 60;(source:Araport11)
AT1G43000	3.14956	3.82242e-05	AT1G43000	PLATZ transcription factor family protein;(source:Araport11)
AT1G43020	-1.70349	0.00661589	AT1G43020	electron protein, putative (Protein of unknown function, DUF547);(source:Araport11)
AT1G43130	0.581809	0.00889182	LCV2	like COV 2;(source:Araport11)
AT1G43160	1.98357	0.0172019	RAP2.6	related to AP2 6;(source:Araport11)
AT1G43560	-0.808188	0.00414601	ty2	thioredoxin Y2;(source:Araport11)
AT1G43620	-0.735033	0.011214	UGT80B1	UDP-Glycosyltransferase superfamily protein;(source:Araport11)
AT1G43650	-1.84878	0.0210308	UMAMIT22	nodulin MtN21 /EamA-like transporter family protein;(source:Araport11)
AT1G43670	-0.768897	1.05272e-06	FBP	Inositol monophosphatase family protein;(source:Araport11)
AT1G43690	0.481446	0.0136427	AT1G43690	ubiquitin interaction motif-containing protein;(source:Araport11)
AT1G43710	-0.694889	3.11335e-05	EMB1075	Pyridoxal phosphate (PLP)-dependent transferases superfamily protein;(source:Araport11)
AT1G43780	-2.45441	0.00313377	scpl44	serine carboxypeptidase-like 44;(source:Araport11)
AT1G43800	0.946417	1.95233e-05	FTM1	Plant stearoyl-acyl-carrier-protein desaturase family protein;(source:Araport11)
AT1G43890	0.508286	0.0108189	RAB18	RAB GTPASE HOMOLOG B18;(source:Araport11)
AT1G43910	2.84786	1.30839e-18	AT1G43910	P-loop containing nucleoside triphosphate hydrolases superfamily protein;(source:Araport11)
AT1G44000	-0.972825	5.44279e-06	AT1G44000	STAY-GREEN-like protein;(source:Araport11)
AT1G44050	-2.21714	0.0181623	AT1G44050	Cysteine/Histidine-rich C1 domain family protein;(source:Araport11)
AT1G44100	0.595888	0.0445834	AAP5	amino acid permease 5;(source:Araport11)
AT1G44130	4.92474	3.86307e-51	AT1G44130	Eukaryotic aspartyl protease family protein;(source:Araport11)
AT1G44350	1.53954	1.78752e-11	ILL6	IAA-amino acid hydrolase ILR1-like 6;(source:Araport11)
AT1G44542	2.84712	0.0040192	AT1G44542	Cyclase family protein;(source:Araport11)
AT1G44575	-1.07744	9.19846e-18	NPQ4	Chlorophyll A-B binding family protein;(source:Araport11)
AT1G44760	-0.979753	0.00889182	AT1G44760	Adenine nucleotide alpha hydrolases-like superfamily protein;(source:Araport11)
AT1G44820	0.617991	0.0275058	AT1G44820	Peptidase M20/M25/M40 family protein;(source:Araport11)
AT1G44920	-0.845148	0.000132188	AT1G44920	transmembrane protein;(source:Araport11)
AT1G44970	-1.17959	0.0239129	AT1G44970	Peroxidase superfamily protein;(source:Araport11)
AT1G45010	-0.965949	0.0108303	AT1G45010	TRAM, LAG1 and CLN8 (TLC) lipid-sensing domain containing protein;(source:Araport11)
AT1G45015	-2.95859	0.00648471	AT1G45015	MD-2-related lipid recognition domain-containing protein;(source:Araport11)
AT1G45130	-1.18997	8.66708e-13	BGAL5	beta-galactosidase 5;(source:Araport11)
AT1G45145	1.97421	1.97504e-06	TRX5	thioredoxin H-type 5;(source:Araport11)
AT1G45150	0.734066	0.0276648	AT1G45150	alpha-1,6-mannosyl-glycoprotein 2-beta-N-acetylglucosaminyltransferase;(source:Araport11)
AT1G45180	0.53254	0.0455051	AT1G45180	RING/U-box superfamily protein;(source:Araport11)
AT1G45201	-1.79542	2.79007e-26	TLL1	triacylglycerol lipase-like 1;(source:Araport11)
AT1G45230	-0.787449	0.00162311	AT1G45230	DCL protein (DUF3223);(source:Araport11)
AT1G45474	-1.05106	8.0048e-08	Lhca5	photosystem I light harvesting complex protein 5;(source:Araport11)
AT1G46264	-0.917557	0.0198911	HSFB4	heat shock transcription factor B4;(source:Araport11)
AT1G46768	0.695609	0.00940978	RAP2.1	related to AP2 1;(source:Araport11)
AT1G47056	0.73191	0.00342089	VFB1	VIER F-box protein 1;(source:Araport11)
AT1G47130	6.62476	6.83259e-28	AT1G47130	hypothetical protein;(source:Araport11)
AT1G47310	0.512753	0.0496723	AT1G47310	signal peptidase I;(source:Araport11)
AT1G47395	1.71525	0.000362374	AT1G47395	hypothetical protein;(source:Araport11)
AT1G47410	-1.30509	0.0204596	AT1G47410	hypothetical protein;(source:Araport11)
AT1G47480	1.23987	0.000577142	AT1G47480	alpha/beta-Hydrolases superfamily protein;(source:Araport11)
AT1G47510	4.57898	4.37219e-39	5PTASE11	inositol polyphosphate 5-phosphatase 11;(source:Araport11)
AT1G47550	0.570979	0.000198834	SEC3A	exocyst complex component sec3A;(source:Araport11)
AT1G47560	1.45317	0.00955718	SEC3B	exocyst complex component sec3B;(source:Araport11)
AT1G47580	-1.29392	0.00131698	DYW1	Pentatricopeptide repeat (PPR) superfamily protein;(source:Araport11)
AT1G47600	-2.66101	0.000623687	BGLU34	beta glucosidase 34;(source:Araport11)
AT1G47620	-1.49416	0.0492871	CYP96A8	cytochrome P450, family 96, subfamily A, polypeptide 8;(source:Araport11)
AT1G47670	-0.611279	0.0150816	AT1G47670	Transmembrane amino acid transporter family protein;(source:Araport11)
AT1G47710	0.445097	0.0261815	SERPIN1	Serine protease inhibitor (SERPIN) family protein;(source:Araport11)
AT1G47740	-0.553019	0.00144434	AT1G47740	PPPDE putative thiol peptidase family protein;(source:Araport11)
AT1G47750	0.813531	0.0132084	PEX11A	peroxin 11A;(source:Araport11)
AT1G47760	-1.7597	0.00421336	AGL102	AGAMOUS-like 102;(source:Araport11)
AT1G47830	0.559094	0.0227698	AT1G47830	SNARE-like superfamily protein;(source:Araport11)
AT1G47890	2.83585	1.62776e-05	RLP7	receptor like protein 7;(source:Araport11)
AT1G47900	-0.625389	0.0155276	AT1G47900	filament-like protein (DUF869);(source:Araport11)
AT1G47960	1.07726	0.00156441	C/VIF1	cell wall / vacuolar inhibitor of fructosidase 1;(source:Araport11)
AT1G47980	-2.45031	0.00589452	AT1G47980	desiccation-like protein;(source:Araport11)
AT1G48000	2.15019	2.38474e-07	MYB112	myb domain protein 112;(source:Araport11)
AT1G48030	-0.502494	0.00446061	mtLPD1	mitochondrial lipoamide dehydrogenase 1;(source:Araport11)
AT1G48230	-0.487607	0.00569817	AT1G48230	nodulin MtN21 /EamA-like transporter family protein;(source:Araport11)
AT1G48280	-0.773334	0.00959099	AT1G48280	hydroxyproline-rich glycoprotein family protein;(source:Araport11)
AT1G48310	-0.718727	0.027126	CHR18	chromatin remodeling factor18;(source:Araport11)
AT1G48320	1.26853	3.14802e-09	DHNAT1	Thioesterase superfamily protein;(source:Araport11)
AT1G48330	-1.26287	0.00500212	AT1G48330	SsrA-binding protein;(source:Araport11)
AT1G48350	-1.03341	2.23001e-07	EMB3105	Ribosomal L18p/L5e family protein;(source:Araport11)
AT1G48420	-0.560647	0.00390158	D-CDES	D-cysteine desulfhydrase;(source:Araport11)
AT1G48460	-1.31763	0.000114415	AT1G48460	tRNA-processing ribonuclease BN;(source:Araport11)
AT1G48470	-2.32358	0.00909787	GLN1;5	glutamine synthetase 1;(source:Araport11)
AT1G48480	-0.633134	0.0109242	RKL1	receptor-like kinase 1;(source:Araport11)
AT1G48490	0.878717	9.66433e-05	AT1G48490	Protein kinase superfamily protein;(source:Araport11)
AT1G48540	-0.552873	0.0237825	AT1G48540	Outer arm dynein light chain 1 protein;(source:Araport11)
AT1G48570	-1.24603	1.90379e-07	AT1G48570	zinc finger (Ran-binding) family protein;(source:Araport11)
AT1G48600	-2.20943	4.38902e-13	PMEAMT	S-adenosyl-L-methionine-dependent methyltransferases superfamily protein;(source:Araport11)
AT1G48610	-0.78746	0.0102786	AT1G48610	AT hook motif-containing protein;(source:Araport11)
AT1G48660	-1.23524	0.00777685	AT1G48660	Auxin-responsive GH3 family protein;(source:Araport11)
AT1G48670	-2.63196	0.000687799	AT1G48670	auxin-responsive GH3 family protein;(source:Araport11)
AT1G48750	-1.30072	8.4301e-05	AT1G48750	Bifunctional inhibitor/lipid-transfer protein/seed storage 2S albumin superfamily protein;(source:Araport11)
AT1G48790	0.604125	6.17419e-05	AMSH1	associated molecule with the SH3 domain of STAM 1;(source:Araport11)
AT1G48850	1.61824	4.82364e-13	EMB1144	chorismate synthase, putative / 5-enolpyruvylshikimate-3-phosphate phospholyase;(source:Araport11)
AT1G48920	-0.683323	0.000861529	NUC-L1	nucleolin like 1;(source:Araport11)
AT1G48930	-1.83426	0.000268391	GH9C1	glycosyl hydrolase 9C1;(source:Araport11)
AT1G48960	-0.556523	0.0330522	AT1G48960	Adenine nucleotide alpha hydrolases-like superfamily protein;(source:Araport11)
AT1G48970	0.736552	0.0120015	AT1G48970	NagB/RpiA/CoA transferase-like superfamily protein;(source:Araport11)
AT1G48990	-2.54972	0.00915482	AT1G48990	Oleosin family protein;(source:Araport11)
AT1G49000	2.23152	7.09356e-06	AT1G49000	transmembrane protein;(source:Araport11)
AT1G49010	-1.29775	8.18161e-11	AT1G49010	Duplicated homeodomain-like superfamily protein;(source:Araport11)
AT1G49050	1.77474	4.9288e-12	AT1G49050	Eukaryotic aspartyl protease family protein;(source:Araport11)
AT1G49130	0.959336	1.23363e-07	BBX17	B-box type zinc finger protein with CCT domain-containing protein;(source:Araport11)
AT1G49230	-1.02825	0.000874353	AT1G49230	RING/U-box superfamily protein;(source:Araport11)
AT1G49240	-0.301925	0.0404707	ACT8	actin 8;(source:Araport11)
AT1G49320	-0.815862	0.0160751	USPL1	unknown seed protein like 1;(source:Araport11)
AT1G49380	-1.07156	3.48716e-05	AT1G49380	cytochrome c biogenesis protein family;(source:Araport11)
AT1G49410	-0.712781	0.0403752	TOM6	translocase of the outer mitochondrial membrane 6;(source:Araport11)
AT1G49430	-1.34579	4.9948e-06	LACS2	long-chain acyl-CoA synthetase 2;(source:Araport11)
AT1G49475	-1.42448	0.0395723	AT1G49475	AP2/B3-like transcriptional factor family protein;(source:Araport11)
AT1G49500	-1.38712	0.00545557	AT1G49500	transcription initiation factor TFIID subunit 1b-like protein;(source:Araport11)
AT1G49510	-1.12358	6.74974e-06	emb1273	embryo defective 1273;(source:Araport11)
AT1G49570	1.79456	0.0491619	AT1G49570	Peroxidase superfamily protein;(source:Araport11)
AT1G49580	-0.870146	0.0105388	AT1G49580	Calcium-dependent protein kinase (CDPK) family protein;(source:Araport11)
AT1G49600	-0.901894	0.00582011	RBP47A	RNA-binding protein 47A;(source:Araport11)
AT1G49720	-0.618097	0.0221557	ABF1	abscisic acid responsive element-binding factor 1;(source:Araport11)
AT1G49760	-0.82171	0.000457345	PAB8	poly(A) binding protein 8;(source:Araport11)
AT1G49820	0.595328	0.0040849	MTK	S-methyl-5-thioribose kinase;(source:Araport11)
AT1G49840	0.573049	0.0478394	AT1G49840	glutamyl-tRNA (Gln) amidotransferase subunit A (DUF620);(source:Araport11)
AT1G49870	-1.02352	0.010961	AT1G49870	myosin-2 heavy chain-like protein;(source:Araport11)
AT1G49890	-0.615733	0.0336103	QWRF2	QWRF motif protein (DUF566);(source:Araport11)
AT1G49900	2.74066	0.000726091	AT1G49900	C2H2 type zinc finger transcription factor family;(source:Araport11)
AT1G49960	-2.42881	4.22355e-06	AT1G49960	Xanthine/uracil permease family protein;(source:Araport11)
AT1G49975	-1.52467	3.04817e-13	AT1G49975	photosystem I reaction center subunit N;(source:Araport11)
AT1G50010	-0.614871	0.00121563	TUA2	tubulin alpha-2 chain;(source:Araport11)
AT1G50020	-0.412769	0.0441228	AT1G50020	tubulin alpha-6 chain;(source:Araport11)
AT1G50060	-2.20429	0.013003	AT1G50060	CAP (Cysteine-rich secretory proteins, Antigen 5, and Pathogenesis-related 1 protein) superfamily protein;(source:Araport11)
AT1G50240	-0.885553	0.00953472	FU
AT1G50250	-0.492715	0.0347514	FTSH1	FTSH protease 1;(source:Araport11)
AT1G50360	1.26612	8.34417e-07	VIIIA	P-loop containing nucleoside triphosphate hydrolases superfamily protein;(source:Araport11)
AT1G50370	0.505196	0.0376778	FYPP1	Calcineurin-like metallo-phosphoesterase superfamily protein;(source:Araport11)
AT1G50420	1.07169	3.88935e-07	SCL3	scarecrow-like 3;(source:Araport11)
AT1G50430	0.634761	0.000543193	DWF5	Ergosterol biosynthesis ERG4/ERG24 family;(source:Araport11)
AT1G50440	0.810662	0.0174946	AT1G50440	RING/FYVE/PHD zinc finger superfamily protein;(source:Araport11)
AT1G50450	-1.22424	4.94843e-10	AT1G50450	Saccharopine dehydrogenase;(source:Araport11)
AT1G50480	0.415613	0.00980851	THFS	10-formyltetrahydrofolate synthetase;(source:Araport11)
AT1G50490	-0.669565	0.0121899	UBC20	ubiquitin-conjugating enzyme 20;(source:Araport11)
AT1G50570	0.863152	0.000113922	AT1G50570	Calcium-dependent lipid-binding (CaLB domain) family protein;(source:Araport11)
AT1G50600	0.559534	0.0105193	SCL5	scarecrow-like 5;(source:Araport11)
AT1G50640	0.571108	0.00813741	ERF3	ethylene responsive element binding factor 3;(source:Araport11)
AT1G50732	-1.25496	0.00672551	AT1G50732	transmembrane protein;(source:Araport11)
AT1G50740	2.59343	1.1584e-56	AT1G50740	Transmembrane proteins 14C;(source:Araport11)
AT1G50900	-1.11902	8.87883e-09	GDC1	Ankyrin repeat family protein;(source:Araport11)
AT1G50950	0.820683	0.0254343	AT1G50950	protein disulfide-isomerase 5-like protein (DUF1692);(source:Araport11)
AT1G50970	-1.14	0.0104262	AT1G50970	Membrane trafficking VPS53 family protein;(source:Araport11)
AT1G51020	3.28279	0.00237446	AT1G51020	hypothetical protein;(source:Araport11)
AT1G51070	-0.454184	0.00188619	bHLH115	basic helix-loop-helix (bHLH) DNA-binding superfamily protein;(source:Araport11)
AT1G51090	1.49425	0.0221844	AT1G51090	Heavy metal transport/detoxification superfamily protein;(source:Araport11)
AT1G51110	-1.134	0.000247315	AT1G51110	Plastid-lipid associated protein PAP / fibrillin family protein;(source:Araport11)
AT1G51160	0.386721	0.0469771	AT1G51160	SNARE-like superfamily protein;(source:Araport11)
AT1G51340	0.874497	0.0143957	AT1G51340	MATE efflux family protein;(source:Araport11)
AT1G51400	-1.11266	0.000851347	AT1G51400	Photosystem II 5 kD protein;(source:Araport11)
AT1G51470	-3.69503	3.32557e-06	BGLU35	beta glucosidase 35;(source:Araport11)
AT1G51510	-0.589623	0.00205531	Y14	RNA-binding (RRM/RBD/RNP motifs) family protein;(source:Araport11)
AT1G51570	-0.346486	0.0307982	AT1G51570	Calcium-dependent lipid-binding (CaLB domain) plant phosphoribosyltransferase family protein;(source:Araport11)
AT1G51620	2.42269	2.06977e-11	AT1G51620	Protein kinase superfamily protein;(source:Araport11)
AT1G51660	0.899132	0.00340584	MKK4	mitogen-activated protein kinase kinase 4;(source:Araport11)
AT1G51680	1.37128	2.92593e-08	4CL1	4-coumarate:CoA ligase 1;(source:Araport11)
AT1G51700	1.24773	1.37433e-07	DOF1	DOF zinc finger protein 1;(source:Araport11)
AT1G51710	0.405322	0.0420091	UBP6	ubiquitin-specific protease 6;(source:Araport11)
AT1G51760	3.12151	3.16757e-66	IAR3	peptidase M20/M25/M40 family protein;(source:Araport11)
AT1G51800	1.82678	0.000311611	IOS1	Leucine-rich repeat protein kinase family protein;(source:Araport11)
AT1G51805	-1.2163	0.00305828	AT1G51805	Leucine-rich repeat protein kinase family protein;(source:Araport11)
AT1G51820	3.10857	3.46205e-05	AT1G51820	Leucine-rich repeat protein kinase family protein;(source:Araport11)
AT1G51890	3.03482	1.75234e-10	AT1G51890	Leucine-rich repeat protein kinase family protein;(source:Araport11)
AT1G51913	5.34148	1.26909e-17	AT1G51913	transmembrane protein;(source:Araport11)
AT1G51915	4.31557	5.26015e-08	AT1G51915	cryptdin protein-like protein;(source:Araport11)
AT1G51920	7.17387	1.49935e-32	AT1G51920	transmembrane protein;(source:Araport11)
AT1G51940	-0.551214	0.0120867	LYK3	protein kinase family protein / peptidoglycan-binding LysM domain-containing protein;(source:Araport11)
AT1G51980	0.518486	0.00359898	AT1G51980	Insulinase (Peptidase family M16) protein;(source:Araport11)
AT1G52000	1.13977	0.0419207	AT1G52000	Mannose-binding lectin superfamily protein;(source:Araport11)
AT1G52050	-3.30155	0.000553608	AT1G52050	Mannose-binding lectin superfamily protein;(source:Araport11)
AT1G52060	-4.79109	3.12189e-09	AT1G52060	Mannose-binding lectin superfamily protein;(source:Araport11)
AT1G52070	-6.28457	2.26226e-15	AT1G52070	Mannose-binding lectin superfamily protein;(source:Araport11)
AT1G52100	-1.36369	5.86035e-05	AT1G52100	Mannose-binding lectin superfamily protein;(source:Araport11)
AT1G52140	0.922787	0.00683057	AT1G52140	Avr9/Cf-9 rapidly elicited protein;(source:Araport11)
AT1G52190	0.502146	0.019994	AT1G52190	Major facilitator superfamily protein;(source:Araport11)
AT1G52200	1.4394	0.00300418	AT1G52200	PLAC8 family protein;(source:Araport11)
AT1G52220	-0.801636	2.75425e-07	AT1G52220	CURVATURE THYLAKOID protein;(source:Araport11)
AT1G52230	-1.48432	7.64671e-10	PSAH2	photosystem I subunit H2;(source:Araport11)
AT1G52240	-2.26635	0.0470843	ROPGEF11	rop guanine nucleotide exchange factor-like protein;(source:Araport11)
AT1G52245	-1.41786	0.000224121	AT1G52245	dynein light chain LC6, flagellar outer arm-like protein;(source:Araport11)
AT1G52260	0.656145	0.024106	PDIL1-5	PDI-like 1-5;(source:Araport11)
AT1G52320	0.717024	0.0140103	AT1G52320	kinesin-like protein;(source:Araport11)
AT1G52340	0.75818	0.0353506	ABA2	NAD(P)-binding Rossmann-fold superfamily protein;(source:Araport11)
AT1G52342	1.12376	0.00790536	AT1G52342	hypothetical protein;(source:Araport11)
AT1G52400	1.11777	0.00289432	BGLU18	beta glucosidase 18;(source:Araport11)
AT1G52410	1.20846	0.00989603	TSA1	TSK-associating protein 1;(source:Araport11)
AT1G52420	0.460141	0.0133043	AT1G52420	UDP-Glycosyltransferase superfamily protein;(source:Araport11)
AT1G52510	-0.731638	0.000507335	AT1G52510	alpha/beta-Hydrolases superfamily protein;(source:Araport11)
AT1G52560	2.28028	0.000454275	AT1G52560	HSP20-like chaperones superfamily protein;(source:Araport11)
AT1G52565	2.35034	2.12688e-08	AT1G52565	cytochrome P450 family protein;(source:Araport11)
AT1G52600	0.685938	0.000681234	AT1G52600	Peptidase S24/S26A/S26B/S26C family protein;(source:Araport11)
AT1G52660	-2.71657	0.00114954	AT1G52660	P-loop containing nucleoside triphosphate hydrolases superfamily protein;(source:Araport11)
AT1G52670	-0.732386	6.34383e-06	AT1G52670	Single hybrid motif superfamily protein;(source:Araport11)
AT1G52750	-1.479	6.57786e-08	AT1G52750	alpha/beta-Hydrolases superfamily protein;(source:Araport11)
AT1G52855	2.89136	0.000370863	AT1G52855	hypothetical protein;(source:Araport11)
AT1G52880	1.06907	0.00103653	NAM	NAC (No Apical Meristem) domain transcriptional regulator superfamily protein;(source:Araport11)
AT1G52890	6.03637	6.41259e-57	NAC019	NAC domain containing protein 19;(source:Araport11)
AT1G52900	2.65162	0.0192397	AT1G52900	Toll-Interleukin-Resistance (TIR) domain family protein;(source:Araport11)
AT1G52910	-1.18797	0.000549865	AT1G52910	fiber (DUF1218);(source:Araport11)
AT1G52930	-0.728169	0.0174036	AT1G52930	Ribosomal RNA processing Brix domain protein;(source:Araport11)
AT1G52980	-0.58555	0.0164804	AtNug2	GTP-binding family protein;(source:Araport11)
AT1G53000	-0.830762	0.000485309	CKS	Nucleotide-diphospho-sugar transferases superfamily protein;(source:Araport11)
AT1G53050	0.498716	0.0121524	AT1G53050	Protein kinase superfamily protein;(source:Araport11)
AT1G53080	4.15188	5.01397e-08	AT1G53080	Legume lectin family protein;(source:Araport11)
AT1G53130	-2.2609	0.0420457	GRI	Stigma-specific Stig1 family protein;(source:Araport11)
AT1G53170	1.21375	0.000753104	ERF8	ethylene response factor 8;(source:Araport11)
AT1G53190	0.490296	0.00771295	AT1G53190	RING/U-box superfamily protein;(source:Araport11)
AT1G53230	-1.00361	1.02636e-05	TCP3	TEOSINTE BRANCHED 1, cycloidea and PCF transcription factor 3;(source:Araport11)
AT1G53240	-0.438709	0.00159691	mMDH1	Lactate/malate dehydrogenase family protein;(source:Araport11)
AT1G53390	0.700415	0.0186715	ABCG24	P-loop containing nucleoside triphosphate hydrolases superfamily protein;(source:Araport11)
AT1G53430	1.87932	8.89241e-09	AT1G53430	Leucine-rich repeat transmembrane protein kinase;(source:Araport11)
AT1G53440	1.03489	0.0135598	AT1G53440	Leucine-rich repeat transmembrane protein kinase;(source:Araport11)
AT1G53490	1.0066	0.0012013	HEI10	RING/U-box superfamily protein;(source:Araport11)
AT1G53510	-0.818675	2.95889e-07	MPK18	mitogen-activated protein kinase 18;(source:Araport11)
AT1G53520	-1.03135	0.00321565	FAP3	Chalcone-flavanone isomerase family protein;(source:Araport11)
AT1G53560	1.0579	8.03532e-05	AT1G53560	Ribosomal protein L18ae family;(source:Araport11)
AT1G53580	0.716843	0.00879098	GLY3	glyoxalase II 3;(source:Araport11)
AT1G53625	7.07798	1.02555e-95	AT1G53625	hypothetical protein;(source:Araport11)
AT1G53635	2.39818	0.0116441	AT1G53635	hypothetical protein;(source:Araport11)
AT1G53670	-0.466505	0.0129732	MSRB1	methionine sulfoxide reductase B 1;(source:Araport11)
AT1G53680	-1.34599	0.0101928	GSTU28	glutathione S-transferase TAU 28;(source:Araport11)
AT1G53750	0.644411	1.71102e-05	RPT1A	regulatory particle triple-A 1A;(source:Araport11)
AT1G53760	0.782309	0.000597012	AT1G53760	K+-H+ exchange-like protein;(source:Araport11)
AT1G53770	1.05434	0.000195959	AT1G53770	O-fucosyltransferase family protein;(source:Araport11)
AT1G53800	-1.13952	3.07232e-13	AT1G53800	muscle M-line assembly protein;(source:Araport11)
AT1G53830	0.757276	0.0488165	PME2	pectin methylesterase 2;(source:Araport11)
AT1G53840	0.882061	0.000419935	PME1	pectin methylesterase 1;(source:Araport11)
AT1G53850	0.528021	0.00224814	PAE1	20S proteasome alpha subunit E1;(source:Araport11)
AT1G53870	1.4884	2.79268e-05	AT1G53870	LURP-one-like protein (DUF567);(source:Araport11)
AT1G53980	2.81811	2.93622e-05	AT1G53980	Ubiquitin-like superfamily protein;(source:Araport11)
AT1G53990	2.4803	0.000348011	GLIP3	GDSL-motif lipase 3;(source:Araport11)
AT1G54010	-1.17323	2.31265e-06	AT1G54010	GDSL-like Lipase/Acylhydrolase superfamily protein;(source:Araport11)
AT1G54020	1.74333	0.0313824	AT1G54020	GDSL-like Lipase/Acylhydrolase superfamily protein;(source:Araport11)
AT1G54090	0.568445	0.00509072	EXO70D2	exocyst subunit exo70 family protein D2;(source:Araport11)
AT1G54095	3.10354	4.85275e-05	AT1G54095	DUF1677 family protein, putative (DUF1677);(source:Araport11)
AT1G54100	1.22147	1.61716e-10	ALDH7B4	aldehyde dehydrogenase 7B4;(source:Araport11)
AT1G54115	0.736831	0.00180473	CCX4	cation calcium exchanger 4;(source:Araport11)
AT1G54130	0.625181	0.00572745	RSH3	RELA/SPOT homolog 3;(source:Araport11)
AT1G54150	0.68945	0.00450862	SPL2	E3 Ubiquitin ligase family protein;(source:Araport11)
AT1G54170	0.503183	0.0181107	CID3	CTC-interacting domain 3;(source:Araport11)
AT1G54200	1.13343	0.000734221	AT1G54200	DNA mismatch repair Msh6-like protein;(source:Araport11)
AT1G54210	0.925308	0.00090677	ATG12A	Ubiquitin-like superfamily protein;(source:Araport11)
AT1G54310	-1.0145	0.00215457	AT1G54310	S-adenosyl-L-methionine-dependent methyltransferases superfamily protein;(source:Araport11)
AT1G54320	0.442216	0.00391906	AT1G54320	LEM3 (ligand-effect modulator 3) family protein / CDC50 family protein;(source:Araport11)
AT1G54350	-0.747407	0.00600251	ABCD2	ABC transporter family protein;(source:Araport11)
AT1G54500	-1.47051	6.0331e-05	AT1G54500	Rubredoxin-like superfamily protein;(source:Araport11)
AT1G54540	-1.3171	0.0283633	AT1G54540	Late embryogenesis abundant (LEA) hydroxyproline-rich glycoprotein family;(source:Araport11)
AT1G54570	0.615746	0.0283202	PES1	Esterase/lipase/thioesterase family protein;(source:Araport11)
AT1G54575	0.994932	6.07606e-05	AT1G54575	hypothetical protein;(source:Araport11)
AT1G54580	-0.753077	9.02947e-09	ACP2	acyl carrier protein 2;(source:Araport11)
AT1G54710	1.07735	1.12978e-09	ATG18H	autophagy 18h-like protein;(source:Araport11)
AT1G54730	-1.08623	0.00300857	AT1G54730	Major facilitator superfamily protein;(source:Araport11)
AT1G54780	-1.12031	4.05322e-07	TLP18.3	thylakoid lumen 18.3 kDa protein;(source:Araport11)
AT1G54820	-1.70634	6.2557e-13	AT1G54820	Protein kinase superfamily protein;(source:Araport11)
AT1G54890	1.54574	1.20844e-06	AT1G54890	Late embryogenesis abundant (LEA) protein-like protein;(source:Araport11)
AT1G54940	-2.0598	0.0228869	PGSIP4	plant glycogenin-like starch initiation protein 4;(source:Araport11)
AT1G54957	3.76898	0.000260064	AT1G54957	transmembrane protein;(source:Araport11)
AT1G54970	-1.20365	0.0376119	PRP1	proline-rich protein 1;(source:Araport11)
AT1G54990	0.961864	0.000104587	AXR4	alpha/beta-Hydrolases superfamily protein;(source:Araport11)
AT1G55020	4.67607	2.45631e-63	LOX1	lipoxygenase 1;(source:Araport11)
AT1G55080	1.12825	4.93794e-05	MED9	mediator of RNA polymerase II transcription subunit-like protein;(source:Araport11)
AT1G55110	1.41735	2.51617e-15	IDD7	indeterminate(ID)-domain 7;(source:Araport11)
AT1G55190	0.50709	0.0470656	PRA7	PRA1 (Prenylated rab acceptor) family protein;(source:Araport11)
AT1G55200	-1.85588	1.50301e-06	AT1G55200	kinase with adenine nucleotide alpha hydrolases-like domain-containing protein;(source:Araport11)
AT1G55230	1.90188	0.0212483	AT1G55230	proteinase inhibitor I4, serpin (DUF716);(source:Araport11)
AT1G55260	-0.847681	1.02683e-06	AT1G55260	Bifunctional inhibitor/lipid-transfer protein/seed storage 2S albumin superfamily protein;(source:Araport11)
AT1G55280	1.22962	0.000543193	AT1G55280	Lipase/lipooxygenase, PLAT/LH2 family protein;(source:Araport11)
AT1G55290	-2.57196	0.0186594	AT1G55290	2-oxoglutarate (2OG) and Fe(II)-dependent oxygenase superfamily protein;(source:Araport11)
AT1G55330	-0.790535	0.000153479	AGP21	arabinogalactan protein 21;(source:Araport11)
AT1G55340	-0.618674	0.0165681	AT1G55340	hypothetical protein (DUF1639);(source:Araport11)
AT1G55370	-1.60443	1.72014e-09	NDF5	NDH-dependent cyclic electron flow 5;(source:Araport11)
AT1G55450	2.51325	4.57912e-12	AT1G55450	S-adenosyl-L-methionine-dependent methyltransferases superfamily protein;(source:Araport11)
AT1G55480	-1.10035	9.35731e-07	ZKT	protein containing PDZ domain, a K-box domain, and a TPR region;(source:Araport11)
AT1G55490	-1.18656	2.49614e-05	CPN60B	chaperonin 60 beta;(source:Araport11)
AT1G55510	0.981163	1.00766e-09	BCDH BETA1	branched-chain alpha-keto acid decarboxylase E1 beta subunit;(source:Araport11)
AT1G55610	0.919874	0.00323319	BRL1	BRI1 like;(source:Araport11)
AT1G55670	-0.955356	0.000149138	PSAG	photosystem I subunit G;(source:Araport11)
AT1G55675	-1.15319	0.00608138	AT1G55675	transmembrane protein;(source:Araport11)
AT1G55740	-1.23265	3.30743e-05	SIP1	seed imbibition 1;(source:Araport11)
AT1G55775	1.84888	0.000596964	AT1G55775	heavy metal-associated domain protein;(source:Araport11)
AT1G55830	0.603542	0.0167246	AT1G55830	coiled-coil protein;(source:Araport11)
AT1G55850	1.38148	3.94673e-06	CSLE1	cellulose synthase like E1;(source:Araport11)
AT1G55920	2.31302	6.6892e-13	SERAT2;1	serine acetyltransferase 2;(source:Araport11)
AT1G55980	-2.03449	0.0481847	AT1G55980	FAD/NAD(P)-binding oxidoreductase family protein;(source:Araport11)
AT1G56020	-1.1644	0.000118032	AT1G56020	serine/arginine repetitive matrix-like protein;(source:Araport11)
AT1G56050	-0.793374	0.00323206	AT1G56050	GTP-binding protein-like protein;(source:Araport11)
AT1G56060	6.68696	2.67154e-71	AT1G56060	cysteine-rich/transmembrane domain protein B;(source:Araport11)
AT1G56090	0.597642	0.046689	AT1G56090	Tetratricopeptide repeat (TPR)-like superfamily protein;(source:Araport11)
AT1G56110	-0.754123	0.00972162	NOP56	NOP56-like pre RNA processing ribonucleoprotein;(source:Araport11)
AT1G56130	2.38148	2.29313e-06	AT1G56130	Leucine-rich repeat transmembrane protein kinase;(source:Araport11)
AT1G56140	1.66338	2.3654e-05	AT1G56140	Leucine-rich repeat transmembrane protein kinase;(source:Araport11)
AT1G56145	1.69522	4.71632e-07	AT1G56145	Leucine-rich repeat transmembrane protein kinase;(source:Araport11)
AT1G56150	-2.33243	6.73038e-07	AT1G56150	SAUR-like auxin-responsive protein family;(source:Araport11)
AT1G56170	0.58678	0.0481096	NF-YC2	nuclear factor Y, subunit C2;(source:Araport11)
AT1G56190	-0.62893	4.73851e-05	AT1G56190	Phosphoglycerate kinase family protein;(source:Araport11)
AT1G56240	6.71224	1.65623e-73	PP2-B13	phloem protein 2-B13;(source:Araport11)
AT1G56250	8.73069	7.71709e-55	PP2-B14	phloem protein 2-B14;(source:Araport11)
AT1G56280	-0.681204	0.0239812	DI19	drought-induced 19;(source:Araport11)
AT1G56300	0.525067	0.0171231	AT1G56300	Chaperone DnaJ-domain superfamily protein;(source:Araport11)
AT1G56320	-1.4758	0.000480751	AT1G56320	hypothetical protein;(source:Araport11)
AT1G56330	0.415344	0.00578081	SAR1B	secretion-associated RAS 1B;(source:Araport11)
AT1G56340	0.935708	1.70199e-05	CRT1a	calreticulin 1a;(source:Araport11)
AT1G56430	1.31268	0.00580323	NAS4	nicotianamine synthase 4;(source:Araport11)
AT1G56440	0.631976	0.0492127	TPR5	Tetratricopeptide repeat (TPR)-like superfamily protein;(source:Araport11)
AT1G56460	0.476475	0.0309271	AT1G56460	HIT zinc finger and PAPA-1-like domain-containing protein;(source:Araport11)
AT1G56500	-0.529266	0.036751	AT1G56500	haloacid dehalogenase-like hydrolase family protein;(source:Araport11)
AT1G56560	0.499017	0.0410741	A/N-InvA	Plant neutral invertase family protein;(source:Araport11)
AT1G56580	0.875523	0.000214565	SVB	plant/protein (Protein of unknown function, DUF538);(source:Araport11)
AT1G56680	-1.1372	0.0244764	AT1G56680	Chitinase family protein;(source:Araport11)
AT1G56710	2.51543	0.00733088	AT1G56710	Pectin lyase-like superfamily protein;(source:Araport11)
AT1G56720	-1.38144	2.13735e-07	AT1G56720	Protein kinase superfamily protein;(source:Araport11)
AT1G57590	-3.4454	2.62156e-07	AT1G57590	Pectinacetylesterase family protein;(source:Araport11)
AT1G57630	7.41382	1.05329e-75	AT1G57630	Toll-Interleukin-Resistance (TIR) domain family protein;(source:Araport11)
AT1G57650	8.48189	1.4272e-33	AT1G57650	ATP binding protein;(source:Araport11)
AT1G57660	-0.579269	0.04962	AT1G57660	Translation protein SH3-like family protein;(source:Araport11)
AT1G57765	0.744585	0.00290055	AT1G57765	transmembrane protein;(source:Araport11)
AT1G57770	-0.68371	0.0134606	AT1G57770	FAD/NAD(P)-binding oxidoreductase family protein;(source:Araport11)
AT1G57990	2.44817	1.27019e-47	PUP18	purine permease 18;(source:Araport11)
AT1G58030	0.601479	0.0195495	CAT2	cationic amino acid transporter 2;(source:Araport11)
AT1G58080	-0.886205	7.24328e-06	ATP-PRT1	ATP phosphoribosyl transferase 1;(source:Araport11)
AT1G58180	0.581359	0.0081469	BCA6	beta carbonic anhydrase 6;(source:Araport11)
AT1G58200	0.479717	0.0213173	MSL3	MSCS-like 3;(source:Araport11)
AT1G58270	-0.534543	0.000877844	ZW9	TRAF-like family protein;(source:Araport11)
AT1G58360	1.03214	4.13871e-07	AAP1	amino acid permease 1;(source:Araport11)
AT1G58400	1.53703	8.03838e-05	AT1G58400	Disease resistance protein (CC-NBS-LRR class) family;(source:Araport11)
AT1G58420	3.7005	3.60402e-14	AT1G58420	Uncharacterized conserved protein UCP031279;(source:Araport11)
AT1G58643	-2.34056	0.0162741	AT1G58643	Inositol-pentakisphosphate 2-kinase family protein;(source:Araport11)
AT1G58807	0.678655	0.000237494	AT1G58807	Disease resistance protein (CC-NBS-LRR class) family;(source:Araport11)
AT1G58848	0.963003	2.01553e-09	AT1G58848	Disease resistance protein (CC-NBS-LRR class) family;(source:Araport11)
AT1G59218	0.600315	0.0164068	AT1G59218	Disease resistance protein (CC-NBS-LRR class) family;(source:Araport11)
AT1G59540	-0.975601	0.0158393	ZCF125	P-loop containing nucleoside triphosphate hydrolases superfamily protein;(source:Araport11)
AT1G59590	2.71809	1.01025e-11	ZCF37	ZCF37;(source:Araport11)
AT1G59610	0.51877	0.00604292	DL3	dynamin-like 3;(source:Araport11)
AT1G59620	0.76047	0.0466667	CW9	Disease resistance protein (CC-NBS-LRR class) family;(source:Araport11)
AT1G59650	0.802874	0.00019944	CW14	CW14 protein (DUF1336);(source:Araport11)
AT1G59660	0.828763	0.010475	AT1G59660	Nucleoporin autopeptidase;(source:Araport11)
AT1G59700	0.555867	0.0225423	GSTU16	glutathione S-transferase TAU 16;(source:Araport11)
AT1G59720	-1.29409	0.0215059	CRR28	Tetratricopeptide repeat (TPR)-like superfamily protein;(source:Araport11)
AT1G59740	3.03034	4.8976e-14	AT1G59740	Major facilitator superfamily protein;(source:Araport11)
AT1G59820	0.879897	4.79131e-06	ALA3	aminophospholipid ATPase 3;(source:Araport11)
AT1G59840	-0.726536	0.0363596	CCB4	cofactor assembly of complex C;(source:Araport11)
AT1G59865	3.0448	0.00179869	AT1G59865	transmembrane protein;(source:Araport11)
AT1G59870	1.42818	3.48161e-11	PEN3	ABC-2 and Plant PDR ABC-type transporter family protein;(source:Araport11)
AT1G59890	0.566474	0.0123823	SNL5	SIN3-like 5;(source:Araport11)
AT1G59910	1.87456	9.16418e-19	AT1G59910	Actin-binding FH2 (formin homology 2) family protein;(source:Araport11)
AT1G59940	-3.02798	4.79131e-06	ARR3	response regulator 3;(source:Araport11)
AT1G59950	5.15835	4.09685e-10	AT1G59950	NAD(P)-linked oxidoreductase superfamily protein;(source:Araport11)
AT1G59960	0.779352	0.000467248	AT1G59960	NAD(P)-linked oxidoreductase superfamily protein;(source:Araport11)
AT1G59980	-1.21358	0.00369589	ARL2	ARG1-like 2;(source:Araport11)
AT1G60000	-0.758541	3.99259e-06	AT1G60000	RNA-binding (RRM/RBD/RNP motifs) family protein;(source:Araport11)
AT1G60030	1.36733	0.0100282	NAT7	nucleobase-ascorbate transporter 7;(source:Araport11)
AT1G60050	-2.64134	0.0183539	UMAMIT35	Nodulin MtN21 /EamA-like transporter family protein;(source:Araport11)
AT1G60090	-1.24311	0.0180266	BGLU4	beta glucosidase 4;(source:Araport11)
AT1G60095	-2.04863	0.00502378	AT1G60095	Mannose-binding lectin superfamily protein;(source:Araport11)
AT1G60140	0.981325	2.57121e-10	TPS10	trehalose phosphate synthase;(source:Araport11)
AT1G60270	-1.74536	0.0235643	BGLU6	beta glucosidase 6;(source:Araport11)
AT1G60390	-0.942629	0.0093954	PG1	polygalacturonase 1;(source:Araport11)
AT1G60420	0.936104	0.00142838	AT1G60420	DC1 domain-containing protein;(source:Araport11)
AT1G60440	1.17477	0.00347783	PANK1	pantothenate kinase 1;(source:Araport11)
AT1G60450	4.12668	9.26766e-09	GolS7	galactinol synthase 7;(source:Araport11)
AT1G60550	-0.955972	6.48198e-07	ECHID	enoyl-CoA hydratase/isomerase D;(source:Araport11)
AT1G60600	-0.908159	9.75871e-05	ABC4	UbiA prenyltransferase family protein;(source:Araport11)
AT1G60610	1.61173	1.91003e-21	AT1G60610	SBP (S-ribonuclease binding protein) family protein;(source:Araport11)
AT1G60640	-0.819847	0.0152385	AT1G60640	stress response protein;(source:Araport11)
AT1G60730	3.11417	1.0878e-27	AT1G60730	NAD(P)-linked oxidoreductase superfamily protein;(source:Araport11)
AT1G60800	-0.889103	2.35188e-05	NIK3	NSP-interacting kinase 3;(source:Araport11)
AT1G60810	-1.03697	8.22001e-05	ACLA-2	ATP-citrate lyase A-2;(source:Araport11)
AT1G60860	-0.888476	0.000518079	AGD2	ARF-GAP domain 2;(source:Araport11)
AT1G60940	0.566578	0.00342587	SNRK2.10	SNF1-related protein kinase 2.10;(source:Araport11)
AT1G60950	-1.6375	3.17478e-09	FED A	2Fe-2S ferredoxin-like superfamily protein;(source:Araport11)
AT1G61050	-2.06219	5.4406e-06	AT1G61050	alpha 1,4-glycosyltransferase family protein;(source:Araport11)
AT1G61080	2.73904	1.25603e-12	AT1G61080	Hydroxyproline-rich glycoprotein family protein;(source:Araport11)
AT1G61120	5.51439	2.71315e-10	TPS04	terpene synthase 04;(source:Araport11)
AT1G61140	0.683833	0.00170366	EDA16	SNF2 domain-containing protein / helicase domain-containing protein / zinc finger protein-like protein;(source:Araport11)
AT1G61215	1.25827	0.000672332	BRD4	bromodomain 4;(source:Araport11)
AT1G61250	1.35548	1.3373e-15	SC3	secretory carrier 3;(source:Araport11)
AT1G61300	-1.09556	0.0115572	AT1G61300	LRR and NB-ARC domains-containing disease resistance protein;(source:Araport11)
AT1G61340	3.20475	6.10589e-19	FBS1	F-box family protein;(source:Araport11)
AT1G61360	3.91879	1.31887e-62	AT1G61360	S-locus lectin protein kinase family protein;(source:Araport11)
AT1G61370	2.56182	5.32555e-23	AT1G61370	S-locus lectin protein kinase family protein;(source:Araport11)
AT1G61380	1.36706	4.3502e-08	SD1-29	S-domain-1 29;(source:Araport11)
AT1G61400	3.01965	8.23888e-10	AT1G61400	S-locus lectin protein kinase family protein;(source:Araport11)
AT1G61415	2.19872	0.0484479	AT1G61415	CAP-gly domain linker;(source:Araport11)
AT1G61430	1.03074	0.0176003	AT1G61430	S-locus lectin protein kinase family protein;(source:Araport11)
AT1G61440	3.85282	1.59791e-13	AT1G61440	S-locus lectin protein kinase family protein;(source:Araport11)
AT1G61520	-1.36217	4.57912e-12	LHCA3	PSI type III chlorophyll a/b-binding protein;(source:Araport11)
AT1G61550	3.99645	3.53693e-16	AT1G61550	S-locus lectin protein kinase family protein;(source:Araport11)
AT1G61560	2.31118	0.00590816	MLO6	Seven transmembrane MLO family protein;(source:Araport11)
AT1G61610	5.12026	8.8588e-13	AT1G61610	S-locus lectin protein kinase family protein;(source:Araport11)
AT1G61640	0.684869	0.0355193	AT1G61640	Protein kinase superfamily protein;(source:Araport11)
AT1G61660	0.871122	0.00520943	AT1G61660	basic helix-loop-helix (bHLH) DNA-binding superfamily protein;(source:Araport11)
AT1G61690	0.625813	0.000564447	AT1G61690	phosphoinositide binding protein;(source:Araport11)
AT1G61750	2.14686	0.000731686	AT1G61750	Receptor-like protein kinase-related family protein;(source:Araport11)
AT1G61790	0.646333	0.00323319	AT1G61790	Oligosaccharyltransferase complex/magnesium transporter family protein;(source:Araport11)
AT1G61795	-0.965773	0.0445942	AT1G61795	PAK-box/P21-Rho-binding family protein;(source:Araport11)
AT1G61800	2.4201	0.00258308	GPT2	glucose-6-phosphate/phosphate translocator 2;(source:Araport11)
AT1G61810	3.17503	1.50976e-38	BGLU45	beta-glucosidase 45;(source:Araport11)
AT1G61820	3.46132	3.3405e-26	BGLU46	beta glucosidase 46;(source:Araport11)
AT1G61840	-1.72142	0.00180675	AT1G61840	Cysteine/Histidine-rich C1 domain family protein;(source:Araport11)
AT1G62020	0.614945	0.000207804	AT1G62020	Coatomer, alpha subunit;(source:Araport11)
AT1G62120	-1.16444	0.0140843	AT1G62120	Mitochondrial transcription termination factor family protein;(source:Araport11)
AT1G62200	1.40642	0.000777725	PTR6	Major facilitator superfamily protein;(source:Araport11)
AT1G62250	-0.650809	0.00985791	AT1G62250	orotidine 5-phosphate decarboxylase;(source:Araport11)
AT1G62290	-1.53176	0.00125249	AT1G62290	Saposin-like aspartyl protease family protein;(source:Araport11)
AT1G62300	3.52515	2.86654e-50	WRKY6	WRKY family transcription factor;(source:Araport11)
AT1G62305	1.44986	2.03907e-10	AT1G62305	Core-2/I-branching beta-1,6-N-acetylglucosaminyltransferase family protein;(source:Araport11)
AT1G62330	-1.15164	1.2682e-08	AT1G62330	O-fucosyltransferase family protein;(source:Araport11)
AT1G62380	1.17684	8.52334e-05	ACO2	ACC oxidase 2;(source:Araport11)
AT1G62420	4.25422	2.35192e-33	AT1G62420	DUF506 family protein (DUF506);(source:Araport11)
AT1G62422	2.10318	6.33304e-23	AT1G62422	hypothetical protein;(source:Araport11)
AT1G62440	1.43151	6.2035e-19	LRX2	leucine-rich repeat/extensin 2;(source:Araport11)
AT1G62570	1.42884	9.60359e-18	FMO GS-OX4	flavin-monooxygenase glucosinolate S-oxygenase 4;(source:Araport11)
AT1G62580	2.47279	2.05471e-05	NOGC1	flavin containing monooxygenase FMO GS-OX-like protein;(source:Araport11)
AT1G62630	-1.58535	1.40333e-06	AT1G62630	Disease resistance protein (CC-NBS-LRR class) family;(source:Araport11)
AT1G62640	-0.63313	0.0435892	KAS III	3-ketoacyl-acyl carrier protein synthase III;(source:Araport11)
AT1G62660	-0.853403	0.044229	AT1G62660	Glycosyl hydrolases family 32 protein;(source:Araport11)
AT1G62740	0.669422	0.0013491	Hop2	stress-inducible protein;(source:Araport11)
AT1G62750	-1.09848	1.41669e-09	SCO1	Translation elongation factor EFG/EF2 protein;(source:Araport11)
AT1G62760	3.33912	1.79019e-15	AT1G62760	Plant invertase/pectin methylesterase inhibitor superfamily protein;(source:Araport11)
AT1G62780	-0.872841	0.00140461	AT1G62780	dimethylallyl, adenosine tRNA methylthiotransferase;(source:Araport11)
AT1G62800	0.984518	0.0250983	ASP4	aspartate aminotransferase 4;(source:Araport11)
AT1G62810	0.412386	0.0287669	CuAO1	Copper amine oxidase family protein;(source:Araport11)
AT1G62840	2.07607	0.00415895	AT1G62840	ankyrin repeat/KH domain protein (DUF1442);(source:Araport11)
AT1G62975	-1.67682	0.000154123	AT1G62975	basic helix-loop-helix (bHLH) DNA-binding superfamily protein;(source:Araport11)
AT1G62980	-2.78527	1.61918e-07	EXPA18	expansin A18;(source:Araport11)
AT1G63090	2.22149	7.29868e-37	PP2-A11	phloem protein 2-A11;(source:Araport11)
AT1G63180	0.830831	0.00100524	UGE3	UDP-D-glucose/UDP-D-galactose 4-epimerase 3;(source:Araport11)
AT1G63240	-0.931567	0.00101208	AT1G63240	hypothetical protein;(source:Araport11)
AT1G63245	1.5771	0.00295318	CLE14	CLAVATA3/ESR-RELATED 14;(source:Araport11)
AT1G63350	1.90682	3.8095e-08	AT1G63350	Disease resistance protein (CC-NBS-LRR class) family;(source:Araport11)
AT1G63440	0.970191	0.00477256	HMA5	heavy metal atpase 5;(source:Araport11)
AT1G63470	-1.0462	0.000299113	AT1G63470	AT hook motif DNA-binding family protein;(source:Araport11)
AT1G63550	3.13954	0.00110534	AT1G63550	Receptor-like protein kinase-related family protein;(source:Araport11)
AT1G63570	1.71537	0.0169365	AT1G63570	Receptor-like protein kinase-related family protein;(source:Araport11)
AT1G63580	2.12261	0.000117696	AT1G63580	Receptor-like protein kinase-related family protein;(source:Araport11)
AT1G63590	5.49857	3.6396e-10	AT1G63590	Receptor-like protein kinase-related family protein;(source:Araport11)
AT1G63650	-1.7083	0.00084268	EGL3	basic helix-loop-helix (bHLH) DNA-binding superfamily protein;(source:Araport11)
AT1G63680	-0.973787	0.000159186	MURE	ALBINO OR PALE-GREEN 13;(source:Araport11)
AT1G63720	2.28662	3.36959e-21	AT1G63720	hydroxyproline-rich glycoprotein family protein;(source:Araport11)
AT1G63740	0.700367	0.00737728	AT1G63740	Disease resistance protein (TIR-NBS-LRR class) family;(source:Araport11)
AT1G63750	1.08603	2.74631e-06	AT1G63750	Disease resistance protein (TIR-NBS-LRR class) family;(source:Araport11)
AT1G63810	-0.569173	0.0466512	AT1G63810	nucleolar protein;(source:Araport11)
AT1G63840	1.89095	1.12291e-09	AT1G63840	RING/U-box superfamily protein;(source:Araport11)
AT1G63850	-0.856082	0.0409289	AT1G63850	BTB/POZ domain-containing protein;(source:Araport11)
AT1G63860	0.89036	0.00254312	AT1G63860	Disease resistance protein (TIR-NBS-LRR class) family;(source:Araport11)
AT1G64000	-2.0164	0.0231807	WRKY56	WRKY DNA-binding protein 56;(source:Araport11)
AT1G64040	0.668665	0.000732328	TOPP3	type one serine/threonine protein phosphatase 3;(source:Araport11)
AT1G64065	4.36908	5.90129e-71	AT1G64065	Late embryogenesis abundant (LEA) hydroxyproline-rich glycoprotein family;(source:Araport11)
AT1G64140	0.471132	0.00459521	AT1G64140	WRKY transcription factor;(source:Araport11)
AT1G64150	-0.785255	0.0482814	AT1G64150	Uncharacterized protein family (UPF0016);(source:Araport11)
AT1G64160	6.85444	5.62993e-42	DIR5	Disease resistance-responsive (dirigent-like protein) family protein;(source:Araport11)
AT1G64185	-1.5837	0.00502378	AT1G64185	Lactoylglutathione lyase / glyoxalase I family protein;(source:Araport11)
AT1G64220	-1.19902	0.00410085	TOM7-2	translocase of outer membrane 7 kDa subunit 2;(source:Araport11)
AT1G64280	1.15284	9.42128e-10	NPR1	regulatory protein (NPR1);(source:Araport11)
AT1G64330	-0.557511	0.032586	AT1G64330	myosin heavy chain-like protein;(source:Araport11)
AT1G64355	-0.642108	0.00355628	AT1G64355	1-acyl-sn-glycerol-3-phosphate acyltransferase;(source:Araport11)
AT1G64360	1.8925	0.0125071	AT1G64360	hypothetical protein;(source:Araport11)
AT1G64380	-0.899834	0.0220287	AT1G64380	Integrase-type DNA-binding superfamily protein;(source:Araport11)
AT1G64400	3.4102	4.81043e-49	LACS3	AMP-dependent synthetase and ligase family protein;(source:Araport11)
AT1G64405	2.27885	1.09192e-05	AT1G64405	hypothetical protein;(source:Araport11)
AT1G64430	-0.606461	0.00128259	AT1G64430	Pentatricopeptide repeat (PPR) superfamily protein;(source:Araport11)
AT1G64450	-0.861731	0.0243552	AT1G64450	Glycine-rich protein family;(source:Araport11)
AT1G64460	0.93306	5.19311e-05	AT1G64460	phosphatidylinositol 4-kinase gamma-like protein;(source:Araport11)
AT1G64480	-2.67564	0.00473223	CBL8	calcineurin B-like protein 8;(source:Araport11)
AT1G64510	-0.878576	1.72309e-05	AT1G64510	Translation elongation factor EF1B/ribosomal protein S6 family protein;(source:Araport11)
AT1G64520	0.420423	0.0154765	RPN12a	regulatory particle non-ATPase 12A;(source:Araport11)
AT1G64590	-4.68851	2.27903e-25	AT1G64590	NAD(P)-binding Rossmann-fold superfamily protein;(source:Araport11)
AT1G64610	2.51233	9.41242e-14	AT1G64610	Transducin/WD40 repeat-like superfamily protein;(source:Araport11)
AT1G64640	-0.49251	0.0316979	ENODL8	early nodulin-like protein 8;(source:Araport11)
AT1G64650	-0.52018	0.00128416	AT1G64650	Major facilitator superfamily protein;(source:Araport11)
AT1G64660	2.29423	5.29583e-31	MGL	methionine gamma-lyase;(source:Araport11)
AT1G64680	-1.38816	5.54248e-15	AT1G64680	beta-carotene isomerase D27;(source:Araport11)
AT1G64700	1.87376	1.44413e-06	AT1G64700	DUF4228 domain protein;(source:Araport11)
AT1G64710	1.21277	3.73952e-16	AT1G64710	GroES-like zinc-binding alcohol dehydrogenase family protein;(source:Araport11)
AT1G64740	0.848954	0.00380154	TUA1	alpha-1 tubulin;(source:Araport11)
AT1G64770	-0.973832	0.00313377	PnsB2	NDH-dependent cyclic electron flow 1;(source:Araport11)
AT1G64780	-1.87171	9.66333e-05	AMT1;2	ammonium transporter 1;(source:Araport11)
AT1G64900	0.871936	0.00286543	CYP89A2	cytochrome P450, family 89, subfamily A, polypeptide 2;(source:Araport11)
AT1G64950	0.918372	0.020344	CYP89A5	cytochrome P450, family 89, subfamily A, polypeptide 5;(source:Araport11)
AT1G65010	-0.487856	0.014414	AT1G65010	WEB family protein (DUF827);(source:Araport11)
AT1G65020	0.866441	0.00144178	AT1G65020	plasma protein;(source:Araport11)
AT1G65030	-0.532326	0.0475204	AT1G65030	Transducin/WD40 repeat-like superfamily protein;(source:Araport11)
AT1G65040	1.79323	2.75053e-07	Hrd1B	RING/U-box superfamily protein;(source:Araport11)
AT1G65060	-1.34495	0.00125965	4CL3	4-coumarate:CoA ligase 3;(source:Araport11)
AT1G65070	-0.608987	0.0470656	AT1G65070	DNA mismatch repair protein MutS, type 2;(source:Araport11)
AT1G65120	-1.79639	0.0150221	AT1G65120	Ubiquitin carboxyl-terminal hydrolase-related protein;(source:Araport11)
AT1G65190	-0.592119	0.0315498	AT1G65190	Protein kinase superfamily protein;(source:Araport11)
AT1G65230	-1.57154	3.71673e-21	AT1G65230	transmembrane protein, putative (DUF2358);(source:Araport11)
AT1G65240	2.39171	5.04969e-06	AT1G65240	Eukaryotic aspartyl protease family protein;(source:Araport11)
AT1G65250	1.50699	0.00186843	AT1G65250	Protein kinase superfamily protein;(source:Araport11)
AT1G65260	-0.579777	0.00967714	PTAC4	plastid transcriptionally active 4;(source:Araport11)
AT1G65295	-0.875262	0.0075188	AT1G65295	ubiquitin carboxyl-terminal hydrolase;(source:Araport11)
AT1G65340	-2.02054	0.00124531	CYP96A3	cytochrome P450, family 96, subfamily A, polypeptide 3;(source:Araport11)
AT1G65370	-0.873878	0.0368854	AT1G65370	TRAF-like family protein;(source:Araport11)
AT1G65390	-1.86796	2.85366e-07	PP2-A5	phloem protein 2 A5;(source:Araport11)
AT1G65430	0.536251	0.0282752	ARI8	IBR domain-containing protein;(source:Araport11)
AT1G65481	1.57292	0.000628099	AT1G65481	transmembrane protein;(source:Araport11)
AT1G65484	2.11983	0.00116098	AT1G65484	transmembrane protein;(source:Araport11)
AT1G65486	0.940042	0.0108613	AT1G65486	transmembrane protein;(source:Araport11)
AT1G65490	2.85773	2.6504e-05	AT1G65490	transmembrane protein;(source:Araport11)
AT1G65500	2.69472	2.30915e-06	AT1G65500	transmembrane protein;(source:Araport11)
AT1G65520	0.953637	0.000589994	ECI1	delta(3), delta(2)-enoyl CoA isomerase 1;(source:Araport11)
AT1G65540	0.942706	1.67615e-06	LETM2	LETM1-like protein;(source:Araport11)
AT1G65580	0.666231	0.00113081	FRA3	Endonuclease/exonuclease/phosphatase family protein;(source:Araport11)
AT1G65610	0.826049	0.0244612	KOR2	Six-hairpin glycosidases superfamily protein;(source:Araport11)
AT1G65680	3.17952	0.00350913	EXPB2	expansin B2;(source:Araport11)
AT1G65690	2.60329	9.9315e-09	AT1G65690	Late embryogenesis abundant (LEA) hydroxyproline-rich glycoprotein family;(source:Araport11)
AT1G65720	0.681311	0.00160605	AT1G65720	transmembrane protein;(source:Araport11)
AT1G65730	0.937007	0.00690792	YSL7	YELLOW STRIPE like 7;(source:Araport11)
AT1G65820	1.56053	5.7988e-24	AT1G65820	microsomal glutathione s-transferase;(source:Araport11)
AT1G65845	1.35957	3.98004e-06	AT1G65845	transmembrane protein;(source:Araport11)
AT1G65860	3.7808	2.11466e-18	FMO GS-OX1	flavin-monooxygenase glucosinolate S-oxygenase 1;(source:Araport11)
AT1G65900	-1.35759	0.0484084	AT1G65900	plant/protein;(source:Araport11)
AT1G65930	0.380438	0.048443	cICDH	cytosolic NADP+-dependent isocitrate dehydrogenase;(source:Araport11)
AT1G65970	3.16558	1.37157e-18	TPX2	thioredoxin-dependent peroxidase 2;(source:Araport11)
AT1G65980	0.602229	0.0180362	TPX1	thioredoxin-dependent peroxidase 1;(source:Araport11)
AT1G66050	1.5925	0.000526064	VIM2	Zinc finger (C3HC4-type RING finger) family protein;(source:Araport11)
AT1G66090	5.07742	7.14846e-88	AT1G66090	Disease resistance protein (TIR-NBS class);(source:Araport11)
AT1G66100	-2.51323	1.0551e-30	AT1G66100	Plant thionin;(source:Araport11)
AT1G66130	-1.05739	4.11993e-05	AT1G66130	NAD(P)-binding Rossmann-fold superfamily protein;(source:Araport11)
AT1G66160	2.80061	6.39391e-28	CMPG1	CYS, MET, PRO, and GLY protein 1;(source:Araport11)
AT1G66180	2.26452	1.77251e-12	AT1G66180	Eukaryotic aspartyl protease family protein;(source:Araport11)
AT1G66340	1.03999	4.26867e-06	ETR1	Signal transduction histidine kinase, hybrid-type, ethylene sensor;(source:Araport11)
AT1G66400	1.24424	0.00525759	CML23	calmodulin like 23;(source:Araport11)
AT1G66430	-0.79732	4.13043e-05	AT1G66430	pfkB-like carbohydrate kinase family protein;(source:Araport11)
AT1G66465	3.46404	1.05937e-06	AT1G66465	transmembrane protein;(source:Araport11)
AT1G66480	2.57187	1.31298e-48	AT1G66480	plastid movement impaired 2;(source:Araport11)
AT1G66500	1.79208	1.5738e-09	AT1G66500	Pre-mRNA cleavage complex II;(source:Araport11)
AT1G66550	2.61139	0.0215024	WRKY67	WRKY DNA-binding protein 67;(source:Araport11)
AT1G66570	6.62925	6.09862e-17	SUC7	sucrose-proton symporter 7;(source:Araport11)
AT1G66580	1.8226	1.67472e-20	SAG24	senescence associated gene 24;(source:Araport11)
AT1G66590	1.68676	2.51976e-06	COX19-1	cytochrome c oxidase 19-1;(source:Araport11)
AT1G66600	2.09187	0.00200872	ABO3	ABA overly sensitive mutant 3;(source:Araport11)
AT1G66680	0.795538	7.15936e-06	AR401	S-adenosyl-L-methionine-dependent methyltransferases superfamily protein;(source:Araport11)
AT1G66690	2.93291	1.54059e-06	AT1G66690	S-adenosyl-L-methionine-dependent methyltransferases superfamily protein;(source:Araport11)
AT1G66700	8.96734	1.16531e-211	PXMT1	S-adenosyl-L-methionine-dependent methyltransferases superfamily protein;(source:Araport11)
AT1G66760	2.28435	1.8888e-28	AT1G66760	MATE efflux family protein;(source:Araport11)
AT1G66780	2.69342	0.00056189	AT1G66780	MATE efflux family protein;(source:Araport11)
AT1G66820	-1.35975	9.57285e-05	AT1G66820	glycine-rich protein;(source:Araport11)
AT1G66830	3.06986	1.17624e-12	AT1G66830	Leucine-rich repeat protein kinase family protein;(source:Araport11)
AT1G66880	3.39142	1.69567e-63	AT1G66880	Protein kinase superfamily protein;(source:Araport11)
AT1G66920	2.74487	3.36778e-21	AT1G66920	Protein kinase superfamily protein;(source:Araport11)
AT1G67000	7.20236	2.6729e-21	AT1G67000	Protein kinase superfamily protein;(source:Araport11)
AT1G67030	-0.969187	0.0252412	ZFP6	zinc finger protein 6;(source:Araport11)
AT1G67050	1.44258	1.7405e-07	AT1G67050	membrane-associated kinase regulator;(source:Araport11)
AT1G67060	1.22336	2.96924e-05	AT1G67060	peptidase M50B-like protein;(source:Araport11)
AT1G67070	2.61671	5.09395e-07	DIN9	Mannose-6-phosphate isomerase, type I;(source:Araport11)
AT1G67090	-1.64413	1.78889e-13	RBCS1A	ribulose bisphosphate carboxylase small chain 1A;(source:Araport11)
AT1G67160	2.65973	0.0187569	AT1G67160	F-box/kelch-repeat protein, putative (DUF295);(source:Araport11)
AT1G67230	0.492415	0.0214471	LINC1	little nuclei1;(source:Araport11)
AT1G67270	2.30977	0.035188	AT1G67270	Zinc-finger domain of monoamine-oxidase A repressor R1 protein;(source:Araport11)
AT1G67325	0.542681	0.00171611	AT1G67325	Ran BP2/NZF zinc finger-like superfamily protein;(source:Araport11)
AT1G67360	1.13502	0.00578184	AT1G67360	Rubber elongation factor protein (REF);(source:Araport11)
AT1G67400	-0.767948	0.0256539	AT1G67400	ELMO/CED-12 family protein;(source:Araport11)
AT1G67430	-0.725027	0.00223274	AT1G67430	Ribosomal protein L22p/L17e family protein;(source:Araport11)
AT1G67470	1.62002	5.37222e-08	AT1G67470	Protein kinase superfamily protein;(source:Araport11)
AT1G67520	2.15416	0.035132	AT1G67520	lectin protein kinase family protein;(source:Araport11)
AT1G67550	-0.649873	0.0135495	URE	urease;(source:Araport11)
AT1G67560	1.07597	8.7602e-07	LOX6	PLAT/LH2 domain-containing lipoxygenase family protein;(source:Araport11)
AT1G67590	-1.02163	0.00618442	AT1G67590	Remorin family protein;(source:Araport11)
AT1G67700	-0.989943	1.43687e-09	AT1G67700	multidrug resistance protein;(source:Araport11)
AT1G67710	-0.902459	0.00698157	ARR11	response regulator 11;(source:Araport11)
AT1G67740	-0.892275	0.00233637	PSBY	photosystem II BY;(source:Araport11)
AT1G67750	-1.43128	0.000640289	AT1G67750	Pectate lyase family protein;(source:Araport11)
AT1G67810	1.77269	1.38558e-28	SUFE2	sulfur E2;(source:Araport11)
AT1G67830	-1.079	6.16507e-06	FXG1	alpha-fucosidase 1;(source:Araport11)
AT1G67840	-0.561457	0.0252714	CSK	chloroplast sensor kinase;(source:Araport11)
AT1G67850	1.836	1.01251e-18	AT1G67850	lysine ketoglutarate reductase trans-splicing protein (DUF707);(source:Araport11)
AT1G67865	2.70097	0.00201927	AT1G67865	hypothetical protein;(source:Araport11)
AT1G67920	2.7309	8.33364e-09	AT1G67920	hypothetical protein;(source:Araport11)
AT1G67930	0.497231	0.00777984	AT1G67930	Golgi transport complex protein-like protein;(source:Araport11)
AT1G67960	0.864878	0.000338057	POD1	POLLEN DEFECTIVE IN GUIDANCE-like protein;(source:Araport11)
AT1G67970	1.3052	1.98315e-05	HSFA8	heat shock transcription factor A8;(source:Araport11)
AT1G67980	7.77151	8.55996e-101	CCOAMT	caffeoyl-CoA 3-O-methyltransferase;(source:Araport11)
AT1G68010	-1.46024	2.47386e-12	HPR	hydroxypyruvate reductase;(source:Araport11)
AT1G68050	-0.714973	0.00834815	FKF1	flavin-binding, kelch repeat, f box 1;(source:Araport11)
AT1G68140	0.491321	0.0218208	AT1G68140	zinc finger/BTB domain protein, putative (DUF1644);(source:Araport11)
AT1G68220	-0.945075	0.000978284	AT1G68220	aerobic coproporphyrinogen-III oxidase (DUF1218);(source:Araport11)
AT1G68300	0.808042	0.00776996	AT1G68300	Adenine nucleotide alpha hydrolases-like superfamily protein;(source:Araport11)
AT1G68310	0.574166	0.013864	AE7	MIP18 family protein (DUF59);(source:Araport11)
AT1G68320	2.01986	0.00432172	MYB62	myb domain protein 62;(source:Araport11)
AT1G68340	2.38868	1.30452e-10	AT1G68340	hypothetical protein (DUF1639);(source:Araport11)
AT1G68370	0.642327	0.0014845	ARG1	Chaperone DnaJ-domain superfamily protein;(source:Araport11)
AT1G68380	2.40651	0.00629925	AT1G68380	Core-2/I-branching beta-1,6-N-acetylglucosaminyltransferase family protein;(source:Araport11)
AT1G68390	4.60103	1.6599e-47	AT1G68390	Core-2/I-branching beta-1,6-N-acetylglucosaminyltransferase family protein;(source:Araport11)
AT1G68400	-0.422387	0.0226649	AT1G68400	leucine-rich repeat transmembrane protein kinase family protein;(source:Araport11)
AT1G68410	0.828731	1.01493e-06	AT1G68410	Protein phosphatase 2C family protein;(source:Araport11)
AT1G68440	0.690904	0.0214131	AT1G68440	transmembrane protein;(source:Araport11)
AT1G68450	4.64498	2.17315e-50	PDE337	VQ motif-containing protein;(source:Araport11)
AT1G68520	-0.949065	0.00400293	BBX14	B-box type zinc finger protein with CCT domain-containing protein;(source:Araport11)
AT1G68550	-0.896419	0.00320999	CRF10	Integrase-type DNA-binding superfamily protein;(source:Araport11)
AT1G68590	-1.01736	0.000543648	PSRP3/1	Ribosomal protein PSRP-3/Ycf65;(source:Araport11)
AT1G68620	3.89095	4.71966e-23	AT1G68620	alpha/beta-Hydrolases superfamily protein;(source:Araport11)
AT1G68630	7.60034	2.55806e-29	AT1G68630	PLAC8 family protein;(source:Araport11)
AT1G68660	-0.608205	0.0293909	AT1G68660	Ribosomal protein L12/ ATP-dependent Clp protease adaptor protein ClpS family protein;(source:Araport11)
AT1G68690	2.08293	1.70056e-13	PERK9	Protein kinase superfamily protein;(source:Araport11)
AT1G68740	1.06909	0.0447345	PHO1;H1	EXS (ERD1/XPR1/SYG1) family protein;(source:Araport11)
AT1G68765	3.87988	1.82931e-05	IDA	Putative membrane lipoprotein;(source:Araport11)
AT1G68780	-1.00905	0.000618037	AT1G68780	RNI-like superfamily protein;(source:Araport11)
AT1G68810	-0.702011	0.0212323	AT1G68810	basic helix-loop-helix (bHLH) DNA-binding superfamily protein;(source:Araport11)
AT1G68870	-1.64874	0.0239107	SOFL2	SOB five-like 2;(source:Araport11)
AT1G68890	-1.20534	0.00867226	PHYLLO	2-oxoglutarate decarboxylase/hydro-lyase/magnesium ion-binding protein;(source:Araport11)
AT1G68910	0.887585	0.00023399	WIT2	WPP domain-interacting protein 2;(source:Araport11)
AT1G68935	-1.51479	0.0451432	AT1G68935	hypothetical protein;(source:Araport11)
AT1G69040	-0.942436	0.000113961	ACR4	ACT domain repeat 4;(source:Araport11)
AT1G69080	-1.4029	0.0104868	AT1G69080	Adenine nucleotide alpha hydrolases-like superfamily protein;(source:Araport11)
AT1G69200	-0.748241	0.0109979	FLN2	fructokinase-like protein;(source:Araport11)
AT1G69240	-2.14138	0.00136803	MES15	methyl esterase 15;(source:Araport11)
AT1G69270	1.053	5.09487e-06	RPK1	receptor-like protein kinase 1;(source:Araport11)
AT1G69340	0.492497	0.0170574	AT1G69340	appr-1-p processing enzyme family protein;(source:Araport11)
AT1G69370	0.863364	0.00365356	CM3	chorismate mutase 3;(source:Araport11)
AT1G69410	1.19552	1.07564e-14	ELF5A-3	eukaryotic elongation factor 5A-3;(source:Araport11)
AT1G69420	-0.79377	0.000292976	AT1G69420	DHHC-type zinc finger family protein;(source:Araport11)
AT1G69480	1.72531	3.34972e-06	AT1G69480	EXS (ERD1/XPR1/SYG1) family protein;(source:Araport11)
AT1G69490	2.46096	3.76105e-11	NAP	NAC-like, activated by AP3/PI;(source:Araport11)
AT1G69523	-1.70203	0.00601189	AT1G69523	S-adenosyl-L-methionine-dependent methyltransferases superfamily protein;(source:Araport11)
AT1G69526	-1.39292	0.0014441	AT1G69526	S-adenosyl-L-methionine-dependent methyltransferases superfamily protein;(source:Araport11)
AT1G69530	1.58282	1.93203e-06	EXPA1	expansin A1;(source:Araport11)
AT1G69570	1.34985	9.99694e-05	AT1G69570	Dof-type zinc finger DNA-binding family protein;(source:Araport11)
AT1G69680	0.92031	0.0145181	AT1G69680	ran guanine nucleotide release factor, putative (Mog1/PsbP/DUF1795-like photosystem II reaction center PsbP family protein);(source:Araport11)
AT1G69700	-0.748566	0.00192932	HVA22C	HVA22 homologue C;(source:Araport11)
AT1G69720	2.14496	0.0387472	HO3	heme oxygenase 3;(source:Araport11)
AT1G69730	1.40327	0.000112878	AT1G69730	Wall-associated kinase family protein;(source:Araport11)
AT1G69750	1.12969	5.32699e-05	COX19-2	cytochrome c oxidase 19-2;(source:Araport11)
AT1G69790	1.94144	2.17365e-05	AT1G69790	Protein kinase superfamily protein;(source:Araport11)
AT1G69840	0.968391	1.77863e-05	AT1G69840	SPFH/Band 7/PHB domain-containing membrane-associated protein family;(source:Araport11)
AT1G69870	2.25907	2.76124e-25	NRT1.7	nitrate transporter 1.7;(source:Araport11)
AT1G69880	5.12135	8.32659e-26	TH8	thioredoxin H-type 8;(source:Araport11)
AT1G69890	1.99742	1.67279e-15	AT1G69890	actin cross-linking protein (DUF569);(source:Araport11)
AT1G69900	2.24664	6.34605e-10	AT1G69900	Actin cross-linking protein;(source:Araport11)
AT1G69920	6.93404	4.44377e-25	GSTU12	glutathione S-transferase TAU 12;(source:Araport11)
AT1G69930	7.6665	4.40109e-169	GSTU11	glutathione S-transferase TAU 11;(source:Araport11)
AT1G69935	-0.626475	0.0272349	SHW1	short hypocotyl in white light1;(source:Araport11)
AT1G69960	0.475063	0.00401963	PP2A	serine/threonine protein phosphatase 2A;(source:Araport11)
AT1G70000	1.13767	8.89646e-08	AT1G70000	myb-like transcription factor family protein;(source:Araport11)
AT1G70070	-0.565227	0.0136879	EMB25	DEAD/DEAH box helicase;(source:Araport11)
AT1G70090	-0.417637	0.0257057	LGT8	glucosyl transferase family 8;(source:Araport11)
AT1G70100	-0.568625	0.0383179	AT1G70100	neurofilament heavy protein;(source:Araport11)
AT1G70130	3.13132	0.000158178	AT1G70130	Concanavalin A-like lectin protein kinase family protein;(source:Araport11)
AT1G70140	2.40305	2.83801e-24	FH8	formin 8;(source:Araport11)
AT1G70170	3.10053	1.47054e-22	MMP	matrix metalloproteinase;(source:Araport11)
AT1G70210	-0.754021	0.0119282	CYCD1;1	CYCLIN D1;(source:Araport11)
AT1G70260	-1.73592	0.0213619	UMAMIT36	nodulin MtN21 /EamA-like transporter family protein;(source:Araport11)
AT1G70280	-0.66689	0.011475	AT1G70280	NHL domain-containing protein;(source:Araport11)
AT1G70300	0.842964	0.00919636	KUP6	K+ uptake permease 6;(source:Araport11)
AT1G70310	-0.751565	7.26868e-05	SPDS2	spermidine synthase 2;(source:Araport11)
AT1G70340	-0.910528	0.0247941	AT1G70340	dicer-like protein (DUF936);(source:Araport11)
AT1G70410	-0.957408	8.58922e-11	BCA4	beta carbonic anhydrase 4;(source:Araport11)
AT1G70420	3.03386	1.84293e-26	AT1G70420	DNA ligase-like protein, putative (DUF1645);(source:Araport11)
AT1G70440	2.8053	0.000233468	SRO3	similar to RCD one 3;(source:Araport11)
AT1G70490	1.63421	5.91729e-14	ARFA1D	Ras-related small GTP-binding family protein;(source:Araport11)
AT1G70580	-1.0741	0.000608301	AOAT2	alanine-2-oxoglutarate aminotransferase 2;(source:Araport11)
AT1G70590	0.717754	0.00553233	AT1G70590	F-box family protein;(source:Araport11)
AT1G70600	-0.579195	0.0486396	AT1G70600	Ribosomal protein L18e/L15 superfamily protein;(source:Araport11)
AT1G70670	1.66518	2.149e-06	CLO4	Caleosin-related family protein;(source:Araport11)
AT1G70700	1.42068	0.000146138	TIFY7	TIFY domain/Divergent CCT motif family protein;(source:Araport11)
AT1G70740	1.34712	1.33903e-11	AT1G70740	Protein kinase superfamily protein;(source:Araport11)
AT1G70750	1.2034	4.39699e-05	AT1G70750	myosin-binding protein (Protein of unknown function, DUF593);(source:Araport11)
AT1G70760	-1.6471	1.42473e-18	NdhL	inorganic carbon transport protein-like protein;(source:Araport11)
AT1G70800	1.02716	0.0323561	EHB1	Calcium-dependent lipid-binding (CaLB domain) family protein;(source:Araport11)
AT1G70810	2.42549	7.18862e-11	AT1G70810	Calcium-dependent lipid-binding (CaLB domain) family protein;(source:Araport11)
AT1G70820	-1.30438	4.73911e-06	AT1G70820	phosphoglucomutase, putative / glucose phosphomutase;(source:Araport11)
AT1G70840	-3.20598	0.00245881	MLP31	MLP-like protein 31;(source:Araport11)
AT1G70850	-1.99971	1.46896e-07	MLP34	MLP-like protein 34;(source:Araport11)
AT1G70860	-2.08248	0.0125225	AT1G70860	Polyketide cyclase/dehydrase and lipid transport superfamily protein;(source:Araport11)
AT1G70890	-1.8068	2.66387e-11	MLP43	MLP-like protein 43;(source:Araport11)
AT1G70895	-0.792735	0.017418	CLE17	CLAVATA3/ESR-RELATED 17;(source:Araport11)
AT1G70900	-0.926054	0.0117475	AT1G70900	hypothetical protein;(source:Araport11)
AT1G70920	4.13939	2.05484e-11	HB18	homeobox-leucine zipper protein 18;(source:Araport11)
AT1G70940	0.70494	0.000116488	PIN3	Auxin efflux carrier family protein;(source:Araport11)
AT1G70980	1.22217	3.99197e-07	SYNC3	Class II aminoacyl-tRNA and biotin synthetases superfamily protein;(source:Araport11)
AT1G71000	-2.49977	0.00245704	AT1G71000	Chaperone DnaJ-domain superfamily protein;(source:Araport11)
AT1G71040	1.72992	1.27192e-08	LPR2	Cupredoxin superfamily protein;(source:Araport11)
AT1G71100	0.891637	0.0087893	RSW10	Ribose 5-phosphate isomerase, type A protein;(source:Araport11)
AT1G71140	3.79206	6.10143e-44	AT1G71140	MATE efflux family protein;(source:Araport11)
AT1G71190	0.821649	0.000817984	SAG18	senescence associated gene 18;(source:Araport11)
AT1G71220	0.990662	0.000136934	EBS1	EMS-MUTAGENIZED BRI1 SUPPRESSOR 1;(source:Araport11)
AT1G71250	-2.31744	0.0395632	AT1G71250	GDSL-like Lipase/Acylhydrolase superfamily protein;(source:Araport11)
AT1G71280	2.52438	0.00999665	AT1G71280	DEA(D/H)-box RNA helicase family protein;(source:Araport11)
AT1G71340	-1.02476	4.80491e-05	GDPD4	PLC-like phosphodiesterases superfamily protein;(source:Araport11)
AT1G71400	0.862338	0.00979115	RLP12	receptor like protein 12;(source:Araport11)
AT1G71480	-0.888652	0.00804456	AT1G71480	Nuclear transport factor 2 (NTF2) family protein;(source:Araport11)
AT1G71500	-1.3076	6.72184e-12	AT1G71500	Rieske (2Fe-2S) domain-containing protein;(source:Araport11)
AT1G71520	4.60545	2.38752e-17	AT1G71520	Integrase-type DNA-binding superfamily protein;(source:Araport11)
AT1G71530	-1.1396	0.00689301	AT1G71530	Protein kinase superfamily protein;(source:Araport11)
AT1G71695	-1.12178	1.88437e-19	AT1G71695	Peroxidase superfamily protein;(source:Araport11)
AT1G71697	1.57833	7.29024e-07	CK1	choline kinase 1;(source:Araport11)
AT1G71720	-1.03267	0.0001748	PDE338	Nucleic acid-binding proteins superfamily;(source:Araport11)
AT1G71790	-0.969318	0.0385139	CPB	Subunits of heterodimeric actin filament capping protein Capz superfamily;(source:Araport11)
AT1G71810	-0.738498	0.040555	AT1G71810	Protein kinase superfamily protein;(source:Araport11)
AT1G71820	0.711757	1.68053e-05	SEC6	SEC6;(source:Araport11)
AT1G71860	0.703278	0.000816439	PTP1	protein tyrosine phosphatase 1;(source:Araport11)
AT1G71890	-1.89826	0.0163678	SUC5	Major facilitator superfamily protein;(source:Araport11)
AT1G71940	0.778373	0.00200496	AT1G71940	SNARE associated Golgi protein family;(source:Araport11)
AT1G71960	-0.556611	0.0376778	ABCG25	ATP-binding casette family G25;(source:Araport11)
AT1G71990	-0.88972	0.0256293	FUT13	fucosyltransferase 13;(source:Araport11)
AT1G72030	-1.30846	0.000483343	AT1G72030	Acyl-CoA N-acyltransferases (NAT) superfamily protein;(source:Araport11)
AT1G72040	-0.765234	0.00627662	dNK	P-loop containing nucleoside triphosphate hydrolases superfamily protein;(source:Araport11)
AT1G72060	3.1147	2.33925e-17	AT1G72060	serine-type endopeptidase inhibitor;(source:Araport11)
AT1G72120	1.74198	2.50771e-06	AT1G72120	Major facilitator superfamily protein;(source:Araport11)
AT1G72125	-1.84136	0.0153578	AT1G72125	Major facilitator superfamily protein;(source:Araport11)
AT1G72200	-1.5706	0.00138809	AT1G72200	RING/U-box superfamily protein;(source:Araport11)
AT1G72230	-1.45066	3.15434e-05	AT1G72230	Cupredoxin superfamily protein;(source:Araport11)
AT1G72280	3.28694	1.24309e-28	ERO1	endoplasmic reticulum oxidoreductins 1;(source:Araport11)
AT1G72300	0.617155	0.0288159	PSY1R	Leucine-rich receptor-like protein kinase family protein;(source:Araport11)
AT1G72310	-0.766062	0.00360355	ATL3	RING/U-box superfamily protein;(source:Araport11)
AT1G72330	0.691269	0.00324061	ALAAT2	alanine aminotransferase 2;(source:Araport11)
AT1G72360	0.946383	0.0369276	ERF73	Integrase-type DNA-binding superfamily protein;(source:Araport11)
AT1G72370	-0.78807	0.00105759	P40	40s ribosomal protein SA;(source:Araport11)
AT1G72410	-0.513266	0.0303688	AT1G72410	COP1-interacting protein-like protein;(source:Araport11)
AT1G72416	-1.13794	1.72309e-05	AT1G72416	Chaperone DnaJ-domain superfamily protein;(source:Araport11)
AT1G72450	2.29666	1.82033e-47	JAZ6	jasmonate-zim-domain protein 6;(source:Araport11)
AT1G72510	-1.01418	5.10634e-07	AT1G72510	DUF1677 family protein (DUF1677);(source:Araport11)
AT1G72520	6.5171	1.07313e-70	LOX4	PLAT/LH2 domain-containing lipoxygenase family protein;(source:Araport11)
AT1G72540	3.85666	9.75218e-10	AT1G72540	Protein kinase superfamily protein;(source:Araport11)
AT1G72570	-1.88026	0.0299713	AT1G72570	Integrase-type DNA-binding superfamily protein;(source:Araport11)
AT1G72600	-0.76199	0.0224203	AT1G72600	hydroxyproline-rich glycoprotein family protein;(source:Araport11)
AT1G72610	-2.27793	1.5508e-14	GER1	germin-like protein 1;(source:Araport11)
AT1G72640	-1.24185	4.12383e-07	AT1G72640	NAD(P)-binding Rossmann-fold superfamily protein;(source:Araport11)
AT1G72645	-1.4094	0.00218054	AT1G72645	transmembrane protein;(source:Araport11)
AT1G72680	1.7086	3.07805e-16	CAD1	cinnamyl-alcohol dehydrogenase;(source:Araport11)
AT1G72730	-0.962606	0.00229142	AT1G72730	DEA(D/H)-box RNA helicase family protein;(source:Araport11)
AT1G72770	0.962884	1.00723e-05	HAB1	HYPERSENSITIVE TO ABA1;(source:Araport11)
AT1G72800	0.798175	0.0477059	AT1G72800	RNA-binding (RRM/RBD/RNP motifs) family protein;(source:Araport11)
AT1G72820	-0.595965	0.00250631	AT1G72820	Mitochondrial substrate carrier family protein;(source:Araport11)
AT1G72860	-1.52995	0.0101973	AT1G72860	Disease resistance protein (TIR-NBS-LRR class) family;(source:Araport11)
AT1G72900	3.21392	2.82794e-13	AT1G72900	Toll-Interleukin-Resistance (TIR) domain-containing protein;(source:Araport11)
AT1G72910	2.08867	0.00326589	AT1G72910	Toll-Interleukin-Resistance (TIR) domain-containing protein;(source:Araport11)
AT1G72920	4.28727	1.12777e-66	AT1G72920	Toll-Interleukin-Resistance (TIR) domain family protein;(source:Araport11)
AT1G72930	0.90249	3.83575e-07	TIR	toll/interleukin-1 receptor-like protein;(source:Araport11)
AT1G72940	2.47011	5.28087e-35	AT1G72940	Toll-Interleukin-Resistance (TIR) domain-containing protein;(source:Araport11)
AT1G73000	-2.51164	0.00348052	PYL3	PYR1-like 3;(source:Araport11)
AT1G73010	4.30172	2.81732e-35	PS2	inorganic pyrophosphatase 1;(source:Araport11)
AT1G73030	0.596951	0.00169121	VPS46.2	SNF7 family protein;(source:Araport11)
AT1G73060	-0.54506	0.00132851	LPA3	Low PSII Accumulation 3;(source:Araport11)
AT1G73080	1.54541	1.51999e-20	PEPR1	PEP1 receptor 1;(source:Araport11)
AT1G73090	-0.856293	0.0306876	AT1G73090	WD repeat protein;(source:Araport11)
AT1G73110	-0.901052	0.0171977	AT1G73110	P-loop containing nucleoside triphosphate hydrolases superfamily protein;(source:Araport11)
AT1G73120	0.95154	1.14813e-08	AT1G73120	F-box/RNI superfamily protein;(source:Araport11)
AT1G73170	-0.766529	0.00178492	AT1G73170	P-loop containing nucleoside triphosphate hydrolases superfamily protein;(source:Araport11)
AT1G73200	0.456262	0.0194029	AT1G73200	testis-expressed sequence 2-like protein (DUF2404);(source:Araport11)
AT1G73260	2.29599	6.03447e-18	KTI1	kunitz trypsin inhibitor 1;(source:Araport11)
AT1G73290	-2.58237	0.0135707	scpl5	serine carboxypeptidase-like 5;(source:Araport11)
AT1G73330	-2.62045	1.41843e-08	DR4	drought-repressed 4;(source:Araport11)
AT1G73360	-1.5206	0.0234608	HDG11	homeodomain GLABROUS 11;(source:Araport11)
AT1G73370	0.888297	0.0283903	SUS6	sucrose synthase 6;(source:Araport11)
AT1G73480	1.71735	3.67905e-11	AT1G73480	alpha/beta-Hydrolases superfamily protein;(source:Araport11)
AT1G73500	1.66806	1.65912e-08	MKK9	MAP kinase kinase 9;(source:Araport11)
AT1G73540	2.19419	4.94e-28	NUDT21	nudix hydrolase homolog 21;(source:Araport11)
AT1G73580	-2.55519	4.08238e-05	AT1G73580	Calcium-dependent lipid-binding (CaLB domain) family protein;(source:Araport11)
AT1G73600	-1.86754	2.81455e-06	AT1G73600	S-adenosyl-L-methionine-dependent methyltransferases superfamily protein;(source:Araport11)
AT1G73610	4.44178	4.9948e-06	AT1G73610	GDSL-like Lipase/Acylhydrolase superfamily protein;(source:Araport11)
AT1G73620	-1.69367	5.06363e-09	AT1G73620	Pathogenesis-related thaumatin superfamily protein;(source:Araport11)
AT1G73630	-1.28696	0.0212511	AT1G73630	EF hand calcium-binding protein family;(source:Araport11)
AT1G73655	-0.894119	5.79077e-06	AT1G73655	FKBP-like peptidyl-prolyl cis-trans isomerase family protein;(source:Araport11)
AT1G73730	1.17189	6.44359e-09	EIL3	ETHYLENE-INSENSITIVE3-like 3;(source:Araport11)
AT1G73740	1.57336	1.01243e-16	AT1G73740	UDP-Glycosyltransferase superfamily protein;(source:Araport11)
AT1G73780	-2.59841	0.00154192	AT1G73780	Bifunctional inhibitor/lipid-transfer protein/seed storage 2S albumin superfamily protein;(source:Araport11)
AT1G73805	2.34761	9.47487e-15	SARD1	Calmodulin binding protein-like protein;(source:Araport11)
AT1G73810	2.84894	5.31172e-18	AT1G73810	Core-2/I-branching beta-1,6-N-acetylglucosaminyltransferase family protein;(source:Araport11)
AT1G73860	-1.80899	0.023533	AT1G73860	P-loop containing nucleoside triphosphate hydrolases superfamily protein;(source:Araport11)
AT1G73880	0.917651	0.00175367	UGT89B1	UDP-glucosyl transferase 89B1;(source:Araport11)
AT1G73885	-1.02752	0.000181458	AT1G73885	AT-rich interactive domain protein;(source:Araport11)
AT1G73920	0.695246	0.00197529	AT1G73920	alpha/beta-Hydrolases superfamily protein;(source:Araport11)
AT1G73965	2.63494	0.000687362	CLE13	CLAVATA3/ESR-RELATED 13;(source:Araport11)
AT1G74000	1.58797	3.20888e-07	SS3	strictosidine synthase 3;(source:Araport11)
AT1G74010	2.50479	4.12072e-23	AT1G74010	Calcium-dependent phosphotriesterase superfamily protein;(source:Araport11)
AT1G74020	1.1458	2.76544e-07	SS2	strictosidine synthase 2;(source:Araport11)
AT1G74055	1.19359	0.0131791	AT1G74055	transmembrane protein;(source:Araport11)
AT1G74070	-0.964344	0.000367056	AT1G74070	Cyclophilin-like peptidyl-prolyl cis-trans isomerase family protein;(source:Araport11)
AT1G74080	6.4973	7.46236e-159	MYB122	myb domain protein 122;(source:Araport11)
AT1G74090	2.08155	1.81291e-26	SOT18	desulfo-glucosinolate sulfotransferase 18;(source:Araport11)
AT1G74100	3.27466	7.25297e-95	SOT16	sulfotransferase 16;(source:Araport11)
AT1G74160	-0.547006	0.0335289	TRM4	LONGIFOLIA protein;(source:Araport11)
AT1G74190	4.79523	2.76544e-07	RLP15	receptor like protein 15;(source:Araport11)
AT1G74330	1.15431	2.22924e-06	AT1G74330	Protein kinase superfamily protein;(source:Araport11)
AT1G74340	0.741878	0.0138392	DPMS2	dolichol phosphate-mannose biosynthesis regulatory protein-like protein;(source:Araport11)
AT1G74360	4.70158	3.30562e-177	AT1G74360	Leucine-rich repeat protein kinase family protein;(source:Araport11)
AT1G74370	-1.03601	0.000485051	AT1G74370	RING/U-box superfamily protein;(source:Araport11)
AT1G74440	1.23414	0.0111601	AT1G74440	ER membrane protein, putative (DUF962);(source:Araport11)
AT1G74450	1.37081	0.00187108	AT1G74450	BPS1-like protein (DUF793);(source:Araport11)
AT1G74460	-1.78265	0.000284631	AT1G74460	GDSL-like Lipase/Acylhydrolase superfamily protein;(source:Araport11)
AT1G74500	-2.74542	2.43291e-11	BS1	activation-tagged BRI1(brassinosteroid-insensitive 1)-suppressor 1;(source:Araport11)
AT1G74590	4.83774	3.28023e-55	GSTU10	glutathione S-transferase TAU 10;(source:Araport11)
AT1G74640	0.543258	0.0176361	AT1G74640	alpha/beta-Hydrolases superfamily protein;(source:Araport11)
AT1G74650	2.11202	0.000140048	MYB31	myb domain protein 31;(source:Araport11)
AT1G74670	-1.05825	0.0249581	GASA6	Gibberellin-regulated family protein;(source:Araport11)
AT1G74690	-0.578271	0.00217938	IQD31	IQ-domain 31;(source:Araport11)
AT1G74710	1.33189	2.1551e-07	EDS16	ADC synthase superfamily protein;(source:Araport11)
AT1G74730	-1.52661	1.03681e-10	AT1G74730	transmembrane protein, putative (DUF1118);(source:Araport11)
AT1G74800	-0.529017	0.0485402	AT1G74800	Galactosyltransferase family protein;(source:Araport11)
AT1G74850	-0.988621	2.73004e-05	PTAC2	plastid transcriptionally active 2;(source:Araport11)
AT1G74880	-0.669492	0.0127045	NdhO	NAD(P)H:plastoquinone dehydrogenase complex subunit O;(source:Araport11)
AT1G74910	-0.46353	0.0344771	AT1G74910	ADP-glucose pyrophosphorylase family protein;(source:Araport11)
AT1G74940	-0.794228	0.000540478	AT1G74940	cyclin-dependent kinase, putative (DUF581);(source:Araport11)
AT1G74950	0.669828	0.00946989	TIFY10B	TIFY domain/Divergent CCT motif family protein;(source:Araport11)
AT1G74970	-0.847238	0.000264885	RPS9	ribosomal protein S9;(source:Araport11)
AT1G75000	5.51247	7.01945e-39	AT1G75000	GNS1/SUR4 membrane protein family;(source:Araport11)
AT1G75020	1.40071	5.4466e-12	LPAT4	lysophosphatidyl acyltransferase 4;(source:Araport11)
AT1G75040	4.3247	3.32679e-15	PR5	pathogenesis-related protein 5;(source:Araport11)
AT1G75140	-0.738678	0.00109747	AT1G75140	membrane protein;(source:Araport11)
AT1G75160	-1.91487	0.0348968	AT1G75160	DUF620 family protein (DUF620);(source:Araport11)
AT1G75170	1.61354	1.2892e-07	AT1G75170	Sec14p-like phosphatidylinositol transfer family protein;(source:Araport11)
AT1G75240	-1.20973	0.00144511	HB33	homeobox protein 33;(source:Araport11)
AT1G75290	1.85323	0.00578184	AT1G75290	NAD(P)-binding Rossmann-fold superfamily protein;(source:Araport11)
AT1G75350	-0.91179	6.21759e-05	emb2184	Ribosomal protein L31;(source:Araport11)
AT1G75380	0.357611	0.0235797	BBD1	bifunctional nuclease in basal defense response 1;(source:Araport11)
AT1G75400	0.579116	0.00255142	AT1G75400	RING/U-box superfamily protein;(source:Araport11)
AT1G75410	0.427375	0.0452421	BLH3	BEL1-like homeodomain 3;(source:Araport11)
AT1G75440	0.753674	0.0114774	UBC16	ubiquitin-conjugating enzyme 16;(source:Araport11)
AT1G75450	2.17548	1.53141e-05	CKX5	cytokinin oxidase 5;(source:Araport11)
AT1G75460	-1.16224	0.000138071	AT1G75460	ATP-dependent protease La (LON) domain protein;(source:Araport11)
AT1G75490	1.27982	0.000913912	AT1G75490	Integrase-type DNA-binding superfamily protein;(source:Araport11)
AT1G75510	0.55476	0.0383242	AT1G75510	Transcription initiation factor IIF, beta subunit;(source:Araport11)
AT1G75520	1.4169	0.0107873	SRS5	SHI-related sequence 5;(source:Araport11)
AT1G75680	-0.589565	0.000236052	GH9B7	glycosyl hydrolase 9B7;(source:Araport11)
AT1G75690	-1.62319	9.15661e-15	LQY1	DnaJ/Hsp40 cysteine-rich domain superfamily protein;(source:Araport11)
AT1G75710	-0.791702	0.0066911	AT1G75710	C2H2-like zinc finger protein;(source:Araport11)
AT1G75730	-0.809965	0.0018444	AT1G75730	hypothetical protein;(source:Araport11)
AT1G75750	-2.42505	9.93683e-15	GASA1	GAST1 protein homolog 1;(source:Araport11)
AT1G75780	-0.921134	0.000820023	TUB1	tubulin beta-1 chain;(source:Araport11)
AT1G75810	0.811246	0.00326341	AT1G75810	transmembrane protein;(source:Araport11)
AT1G75820	-0.624481	0.000685577	CLV1	Leucine-rich receptor-like protein kinase family protein;(source:Araport11)
AT1G75830	2.58653	0.00100636	LCR67	low-molecular-weight cysteine-rich 67;(source:Araport11)
AT1G76040	1.23133	4.43467e-06	CPK29	calcium-dependent protein kinase 29;(source:Araport11)
AT1G76070	3.30476	2.7147e-47	AT1G76070	hypothetical protein;(source:Araport11)
AT1G76100	-0.74321	0.034578	PETE1	plastocyanin 1;(source:Araport11)
AT1G76110	-1.45141	0.000640246	AT1G76110	HMG (high mobility group) box protein with ARID/BRIGHT DNA-binding domain-containing protein;(source:Araport11)
AT1G76130	1.81342	8.25174e-12	AMY2	alpha-amylase-like 2;(source:Araport11)
AT1G76140	0.456381	0.0160043	AT1G76140	Prolyl oligopeptidase family protein;(source:Araport11)
AT1G76150	1.15002	2.36494e-16	ECH2	enoyl-CoA hydratase 2;(source:Araport11)
AT1G76180	0.486558	0.0420835	ERD14	Dehydrin family protein;(source:Araport11)
AT1G76250	0.784665	0.0495178	AT1G76250	transmembrane protein;(source:Araport11)
AT1G76390	1.22945	5.13153e-10	PUB43	ARM repeat superfamily protein;(source:Araport11)
AT1G76410	1.62937	8.71956e-07	ATL8	RING/U-box superfamily protein;(source:Araport11)
AT1G76450	-0.668138	0.000506584	AT1G76450	Photosystem II reaction center PsbP family protein;(source:Araport11)
AT1G76470	2.05571	0.00138265	AT1G76470	NAD(P)-binding Rossmann-fold superfamily protein;(source:Araport11)
AT1G76530	-2.28472	0.0479647	AT1G76530	Auxin efflux carrier family protein;(source:Araport11)
AT1G76540	-0.630977	0.0126566	CDKB2;1	cyclin-dependent kinase B2;(source:Araport11)
AT1G76570	-0.818601	0.040287	AT1G76570	Chlorophyll A-B binding family protein;(source:Araport11)
AT1G76590	0.933887	0.0102557	AT1G76590	PLATZ transcription factor family protein;(source:Araport11)
AT1G76600	2.39449	9.39536e-12	AT1G76600	poly polymerase;(source:Araport11)
AT1G76640	3.39999	8.13053e-08	AT1G76640	Calcium-binding EF-hand family protein;(source:Araport11)
AT1G76650	3.48785	1.34898e-23	CML38	calmodulin-like 38;(source:Araport11)
AT1G76700	1.52556	9.68398e-22	AT1G76700	DNAJ heat shock N-terminal domain-containing protein;(source:Araport11)
AT1G76800	-1.5872	0.0233577	AT1G76800	Vacuolar iron transporter (VIT) family protein;(source:Araport11)
AT1G76900	0.548261	0.00660087	TLP1	tubby like protein 1;(source:Araport11)
AT1G76920	0.531623	0.0491619	AT1G76920	F-box family protein;(source:Araport11)
AT1G76930	3.47677	8.97268e-47	EXT4	extensin 4;(source:Araport11)
AT1G76960	2.08647	0.00659346	AT1G76960	transmembrane protein;(source:Araport11)
AT1G76970	1.98859	6.59057e-08	AT1G76970	Target of Myb protein 1;(source:Araport11)
AT1G76980	1.03857	0.0110887	AT1G76980	patatin-like phospholipase domain protein;(source:Araport11)
AT1G76990	-0.605602	5.08051e-05	ACR3	ACT domain repeat 3;(source:Araport11)
AT1G77000	0.944123	0.00162155	SKP2B	RNI-like superfamily protein;(source:Araport11)
AT1G77030	-0.563165	0.0173446	AT1G77030	putative DEAD-box ATP-dependent RNA helicase 29;(source:Araport11)
AT1G77090	-1.22752	2.73082e-07	AT1G77090	thylakoid lumenal protein (Mog1/PsbP/DUF1795-like photosystem II reaction center PsbP family protein);(source:Araport11)
AT1G77120	2.37874	6.36743e-19	ADH1	alcohol dehydrogenase 1;(source:Araport11)
AT1G77122	-0.702396	0.00815758	AT1G77122	Uncharacterized protein family UPF0090;(source:Araport11)
AT1G77140	0.48219	0.0299585	VPS45	vacuolar protein sorting 45;(source:Araport11)
AT1G77210	1.10163	0.00421718	STP14	sugar transporter 14;(source:Araport11)
AT1G77220	0.915919	0.00171142	AT1G77220	organic solute transporter ostalpha protein (DUF300);(source:Araport11)
AT1G77260	0.624796	0.00986476	AT1G77260	S-adenosyl-L-methionine-dependent methyltransferases superfamily protein;(source:Araport11)
AT1G77280	0.920202	0.00327385	AT1G77280	kinase with adenine nucleotide alpha hydrolases-like domain-containing protein;(source:Araport11)
AT1G77330	-0.937577	0.0354672	AT1G77330	2-oxoglutarate (2OG) and Fe(II)-dependent oxygenase superfamily protein;(source:Araport11)
AT1G77360	1.55872	9.60662e-05	APPR6	Tetratricopeptide repeat (TPR)-like superfamily protein;(source:Araport11)
AT1G77370	1.05445	0.000145036	AT1G77370	Glutaredoxin family protein;(source:Araport11)
AT1G77380	2.06515	2.59933e-14	AAP3	amino acid permease 3;(source:Araport11)
AT1G77420	0.70553	0.00235852	AT1G77420	alpha/beta-Hydrolases superfamily protein;(source:Araport11)
AT1G77440	0.490072	0.016331	PBC2	20S proteasome beta subunit C2;(source:Araport11)
AT1G77490	-0.920513	5.35537e-05	TAPX	thylakoidal ascorbate peroxidase;(source:Araport11)
AT1G77500	1.30256	4.87103e-11	AT1G77500	DUF630 family protein, putative (DUF630 and DUF632);(source:Araport11)
AT1G77510	2.37624	1.73438e-24	PDIL1-2	PDI-like 1-2;(source:Araport11)
AT1G77520	-2.44642	0.0164955	AT1G77520	O-methyltransferase family protein;(source:Araport11)
AT1G77580	-0.949007	0.000221552	AT1G77580	filament-like protein (DUF869);(source:Araport11)
AT1G77660	1.5244	4.15613e-14	AT1G77660	Histone H3 K4-specific methyltransferase SET7/9 family protein;(source:Araport11)
AT1G77670	0.624733	0.00936141	AT1G77670	Pyridoxal phosphate (PLP)-dependent transferases superfamily protein;(source:Araport11)
AT1G77710	0.554471	0.0201342	CCP2	ubiquitin-fold modifier;(source:Araport11)
AT1G77760	3.23554	1.4607e-25	NIA1	nitrate reductase 1;(source:Araport11)
AT1G77770	0.581591	0.00624931	AT1G77770	forkhead box protein, putative (DUF1644);(source:Araport11)
AT1G77810	0.992979	0.000450389	AT1G77810	Galactosyltransferase family protein;(source:Araport11)
AT1G77855	-0.904881	0.0210329	AT1G77855	BPS1-like protein;(source:Araport11)
AT1G77890	1.15749	0.000657574	AT1G77890	DNA-directed RNA polymerase II protein;(source:Araport11)
AT1G77920	0.768002	0.0157362	TGA7	bZIP transcription factor family protein;(source:Araport11)
AT1G78010	-0.930776	4.06389e-05	AT1G78010	tRNA modification GTPase;(source:Araport11)
AT1G78020	-1.46699	4.49188e-12	AT1G78020	senescence-associated family protein, putative (DUF581);(source:Araport11)
AT1G78060	-0.605088	0.00310068	AT1G78060	Glycosyl hydrolase family protein;(source:Araport11)
AT1G78070	0.602508	0.048045	AT1G78070	Transducin/WD40 repeat-like superfamily protein;(source:Araport11)
AT1G78120	-1.18863	0.0320997	TPR12	Tetratricopeptide repeat (TPR)-like superfamily protein;(source:Araport11)
AT1G78170	-1.07577	1.11895e-05	AT1G78170	E3 ubiquitin-protein ligase;(source:Araport11)
AT1G78180	-1.2589	3.32002e-06	AT1G78180	Mitochondrial substrate carrier family protein;(source:Araport11)
AT1G78210	1.67922	1.23195e-12	AT1G78210	alpha/beta-Hydrolases superfamily protein;(source:Araport11)
AT1G78260	-0.795042	0.000150224	AT1G78260	RNA-binding (RRM/RBD/RNP motifs) family protein;(source:Araport11)
AT1G78280	1.40196	3.17148e-20	AT1G78280	transferases, transferring glycosyl groups;(source:Araport11)
AT1G78290	1.79467	2.69444e-16	SNRK2-8
AT1G78410	5.04421	3.51493e-29	AT1G78410	VQ motif-containing protein;(source:Araport11)
AT1G78450	-1.91058	4.53589e-07	AT1G78450	SOUL heme-binding family protein;(source:Araport11)
AT1G78490	0.646616	0.0117001	CYP708A3	cytochrome P450, family 708, subfamily A, polypeptide 3;(source:Araport11)
AT1G78520	-2.42353	0.0210927	AT1G78520	Carbohydrate-binding X8 domain superfamily protein;(source:Araport11)
AT1G78580	-0.676845	0.00101842	TPS1	trehalose-6-phosphate synthase;(source:Araport11)
AT1G78630	-0.860756	3.92054e-06	emb1473	Ribosomal protein L13 family protein;(source:Araport11)
AT1G78660	0.516499	0.00152155	GGH1	gamma-glutamyl hydrolase 1;(source:Araport11)
AT1G78680	-0.530295	0.0034681	GGH2	gamma-glutamyl hydrolase 2;(source:Araport11)
AT1G78820	-0.627294	0.00254718	AT1G78820	D-mannose binding lectin protein with Apple-like carbohydrate-binding domain-containing protein;(source:Araport11)
AT1G78830	2.29003	1.09192e-09	AT1G78830	Curculin-like (mannose-binding) lectin family protein;(source:Araport11)
AT1G78850	3.39794	3.09002e-42	AT1G78850	D-mannose binding lectin protein with Apple-like carbohydrate-binding domain-containing protein;(source:Araport11)
AT1G78860	1.07758	0.00214968	AT1G78860	D-mannose binding lectin protein with Apple-like carbohydrate-binding domain-containing protein;(source:Araport11)
AT1G78870	0.454638	0.0152555	UBC35	ubiquitin-conjugating enzyme 35;(source:Araport11)
AT1G78895	0.614024	0.0202468	AT1G78895	Reticulon family protein;(source:Araport11)
AT1G78920	1.00923	5.68832e-12	VP2	vacuolar H+-pyrophosphatase 2;(source:Araport11)
AT1G78930	-0.9688	0.0182405	AT1G78930	Mitochondrial transcription termination factor family protein;(source:Araport11)
AT1G78990	-2.97759	1.16692e-10	AT1G78990	HXXXD-type acyl-transferase family protein;(source:Araport11)
AT1G78995	-1.89079	9.0768e-15	AT1G78995	hypothetical protein;(source:Araport11)
AT1G79030	-1.02151	0.00597728	AT1G79030	Chaperone DnaJ-domain superfamily protein;(source:Araport11)
AT1G79040	-1.34973	2.78424e-10	PSBR	photosystem II subunit R;(source:Araport11)
AT1G79060	-0.792667	0.0280513	AT1G79060	TPRXL;(source:Araport11)
AT1G79110	-1.14973	7.05614e-05	BRG2	zinc ion binding protein;(source:Araport11)
AT1G79150	-0.877038	0.000217363	AT1G79150	binding protein;(source:Araport11)
AT1G79160	0.853708	4.1706e-06	AT1G79160	filamentous hemagglutinin transporter;(source:Araport11)
AT1G79320	-2.27078	0.000367689	MC6	metacaspase 6;(source:Araport11)
AT1G79360	1.55264	3.20247e-05	2002-10-01	organic cation/carnitine transporter 2;(source:Araport11)
AT1G79450	0.792646	0.0148189	ALIS5	ALA-interacting subunit 5;(source:Araport11)
AT1G79460	-1.18688	0.00181544	GA2	Terpenoid cyclases/Protein prenyltransferases superfamily protein;(source:Araport11)
AT1G79470	-0.702229	0.034542	AT1G79470	Aldolase-type TIM barrel family protein;(source:Araport11)
AT1G79500	-1.08979	7.76643e-07	AtkdsA1	Aldolase-type TIM barrel family protein;(source:Araport11)
AT1G79550	0.662969	0.00473642	PGK	phosphoglycerate kinase;(source:Araport11)
AT1G79560	-0.61634	0.0139962	FTSH12	FTSH protease 12;(source:Araport11)
AT1G79670	0.976461	4.57107e-06	RFO1	Wall-associated kinase family protein;(source:Araport11)
AT1G79680	10.3069	5.30537e-67	WAKL10	WALL ASSOCIATED KINASE (WAK)-LIKE 10;(source:Araport11)
AT1G79690	1.01637	2.0359e-06	NUDT3	nudix hydrolase homolog 3;(source:Araport11)
AT1G79700	-0.650839	0.0432262	WRI4	Integrase-type DNA-binding superfamily protein;(source:Araport11)
AT1G79760	-1.1223	0.00649997	DTA4	downstream target of AGL15-4;(source:Araport11)
AT1G79790	-0.894135	4.52976e-05	FHY1	Haloacid dehalogenase-like hydrolase (HAD) superfamily protein;(source:Araport11)
AT1G79840	-1.0701	0.0104002	GL2	HD-ZIP IV family of homeobox-leucine zipper protein with lipid-binding START domain-containing protein;(source:Araport11)
AT1G79850	-1.03395	0.000278017	RPS17	ribosomal protein S17;(source:Araport11)
AT1G79860	-2.15111	0.0115254	ROPGEF12	RHO guanyl-nucleotide exchange factor 12;(source:Araport11)
AT1G79870	-0.357622	0.045312	AT1G79870	D-isomer specific 2-hydroxyacid dehydrogenase family protein;(source:Araport11)
AT1G79880	-0.830851	0.00848449	La2	RNA recognition motif (RRM)-containing protein;(source:Araport11)
AT1G79920	0.565669	0.00759044	Hsp70-15	Heat shock protein 70 (Hsp 70) family protein;(source:Araport11)
AT1G80030	-0.580451	0.0075188	AT1G80030	Molecular chaperone Hsp40/DnaJ family protein;(source:Araport11)
AT1G80050	-1.73045	2.69017e-05	APT2	adenine phosphoribosyl transferase 2;(source:Araport11)
AT1G80110	1.00379	8.34202e-05	PP2-B11	phloem protein 2-B11;(source:Araport11)
AT1G80120	-1.56168	0.000408268	AT1G80120	LURP-one-like protein (DUF567);(source:Araport11)
AT1G80130	1.29158	0.0328343	AT1G80130	Tetratricopeptide repeat (TPR)-like superfamily protein;(source:Araport11)
AT1G80160	4.51188	6.51692e-29	GLYI7	Lactoylglutathione lyase / glyoxalase I family protein;(source:Araport11)
AT1G80190	0.807468	0.0105381	PSF1	partner of SLD five 1;(source:Araport11)
AT1G80240	2.03436	1.39981e-11	DGR1	choice-of-anchor C domain protein, putative (Protein of unknown function, DUF642);(source:Araport11)
AT1G80300	2.22696	8.9309e-23	NTT1	nucleotide transporter 1;(source:Araport11)
AT1G80340	-2.57791	2.68661e-05	GA3OX2	gibberellin 3-oxidase 2;(source:Araport11)
AT1G80360	0.618794	0.0307252	AT1G80360	Pyridoxal phosphate (PLP)-dependent transferases superfamily protein;(source:Araport11)
AT1G80370	-0.794775	0.011043	CYCA2;4	Cyclin A2;(source:Araport11)
AT1G80440	1.20132	0.0036412	AT1G80440	Galactose oxidase/kelch repeat superfamily protein;(source:Araport11)
AT1G80450	2.07362	2.6751e-08	AT1G80450	VQ motif-containing protein;(source:Araport11)
AT1G80460	0.737217	0.00126593	NHO1	Actin-like ATPase superfamily protein;(source:Araport11)
AT1G80480	-0.468343	0.00547562	PTAC17	plastid transcriptionally active 17;(source:Araport11)
AT1G80510	0.892504	0.00190313	AT1G80510	Transmembrane amino acid transporter family protein;(source:Araport11)
AT1G80520	1.71385	9.17468e-05	AT1G80520	Sterile alpha motif (SAM) domain-containing protein;(source:Araport11)
AT1G80540	-2.17232	0.0339545	AT1G80540	envelope glycoprotein B;(source:Araport11)
AT1G80590	3.33013	4.11232e-05	WRKY66	WRKY DNA-binding protein 66;(source:Araport11)
AT1G80610	0.784733	0.0081469	AT1G80610	hypothetical protein;(source:Araport11)
AT1G80640	-1.35934	6.47527e-12	AT1G80640	Protein kinase superfamily protein;(source:Araport11)
AT1G80650	-0.745849	0.0131694	RTL1	RNAse THREE-like protein 1;(source:Araport11)
AT1G80670	0.572062	0.00371606	RAE1	Transducin/WD40 repeat-like superfamily protein;(source:Araport11)
AT1G80690	-1.72821	0.000627683	AT1G80690	PPPDE putative thiol peptidase family protein;(source:Araport11)
AT1G80750	-0.534724	0.00636934	AT1G80750	Ribosomal protein L30/L7 family protein;(source:Araport11)
AT1G80820	3.51122	5.12314e-21	CCR2	cinnamoyl coa reductase;(source:Araport11)
AT1G80840	3.34144	4.77292e-55	WRKY40	WRKY DNA-binding protein 40;(source:Araport11)
AT1G80920	0.771165	0.00818813	J8	Chaperone DnaJ-domain superfamily protein;(source:Araport11)
AT1G80950	0.451236	0.034224	AT1G80950	Phospholipid/glycerol acyltransferase family protein;(source:Araport11)
AT2G01110	-0.467354	0.00874767	APG2	Sec-independent periplasmic protein translocase;(source:Araport11)
AT2G01180	2.10239	2.74225e-36	PAP1	phosphatidic acid phosphatase 1;(source:Araport11)
AT2G01190	0.481122	0.0228607	PDE331	Octicosapeptide/Phox/Bem1p family protein;(source:Araport11)
AT2G01250	-0.519282	0.0441219	AT2G01250	Ribosomal protein L30/L7 family protein;(source:Araport11)
AT2G01290	-0.945916	0.000411505	RPI2	ribose-5-phosphate isomerase 2;(source:Araport11)
AT2G01300	4.23302	9.0607e-28	AT2G01300	mediator of RNA polymerase II transcription subunit;(source:Araport11)
AT2G01340	2.32983	5.11144e-20	At17.1	plastid movement impaired protein;(source:Araport11)
AT2G01350	0.411633	0.0208363	QPT	quinolinate phoshoribosyltransferase;(source:Araport11)
AT2G01379	9.14918	2.75984e-41	AT2G01379	transmembrane protein;(source:Araport11)
AT2G01410	0.579217	0.00706672	AT2G01410	NHL domain-containing protein;(source:Araport11)
[truncated: 5,508 more rows]

## Sheet: 10DAS
10 days after sowing (DAS)
geneID	log2(FC)	P-adj	Gene Symbol	TAIR Description
AT1G01010	0.876737	5.31053e-05	NAC001	NAC domain containing protein 1;(source:Araport11)
AT1G01040	-0.447811	0.00561476	DCL1	dicer-like 1;(source:Araport11)
AT1G01090	-0.439598	0.0114798	PDH-E1 ALPHA	pyruvate dehydrogenase E1 alpha;(source:Araport11)
AT1G01170	-0.720419	0.00115915	AT1G01170	ozone-responsive stress-like protein (DUF1138);(source:Araport11)
AT1G01180	0.558257	0.000415546	AT1G01180	S-adenosyl-L-methionine-dependent methyltransferases superfamily protein;(source:Araport11)
AT1G01190	-2.29161	2.28244e-07	CYP78A8	cytochrome P450, family 78, subfamily A, polypeptide 8;(source:Araport11)
AT1G01210	-0.876579	0.000240577	AT1G01210	DNA-directed RNA polymerase, subunit M, archaeal;(source:Araport11)
AT1G01220	0.404924	0.0106867	FKGP	L-fucokinase/GDP-L-fucose pyrophosphorylase;(source:Araport11)
AT1G01240	0.617128	0.000404308	AT1G01240	transmembrane protein;(source:Araport11)
AT1G01320	-0.699091	0.000154196	AT1G01320	Tetratricopeptide repeat (TPR)-like superfamily protein;(source:Araport11)
AT1G01340	0.715235	0.0278974	CNGC10	cyclic nucleotide gated channel 10;(source:Araport11)
AT1G01370	1.18086	0.00968946	HTR12	Histone superfamily protein;(source:Araport11)
AT1G01470	0.682054	7.86822e-05	LEA14	Late embryogenesis abundant protein;(source:Araport11)
AT1G01480	2.26854	0.000817507	ACS2	1-amino-cyclopropane-1-carboxylate synthase 2;(source:Araport11)
AT1G01490	0.723814	0.00021649	AT1G01490	Heavy metal transport/detoxification superfamily protein;(source:Araport11)
AT1G01500	-0.372038	0.0121906	AT1G01500	Erythronate-4-phosphate dehydrogenase family protein;(source:Araport11)
AT1G01510	0.324312	0.0291448	AN	NAD(P)-binding Rossmann-fold superfamily protein;(source:Araport11)
AT1G01560	2.30161	1.60034e-06	MPK11	MAP kinase 11;(source:Araport11)
AT1G01580	2.39457	6.37613e-08	FRO2	ferric reduction oxidase 2;(source:Araport11)
AT1G01600	1.23782	4.47995e-05	CYP86A4	cytochrome P450, family 86, subfamily A, polypeptide 4;(source:Araport11)
AT1G01620	-0.760863	0.00236472	PIP1C	plasma membrane intrinsic protein 1C;(source:Araport11)
AT1G01650	0.413134	0.0359512	SPPL4	SIGNAL PEPTIDE PEPTIDASE-LIKE 4;(source:Araport11)
AT1G01670	0.761659	0.0338744	AT1G01670	RING/U-box superfamily protein;(source:Araport11)
AT1G01680	2.14311	3.62073e-06	PUB54	plant U-box 54;(source:Araport11)
AT1G01710	0.411226	0.0127512	AT1G01710	acyl-CoA thioesterase II;(source:Araport11)
AT1G01720	0.668515	0.00313852	ATAF1	NAC (No Apical Meristem) domain transcriptional regulator superfamily protein;(source:Araport11)
AT1G01730	0.63899	5.84362e-06	AT1G01730	hypothetical protein;(source:Araport11)
AT1G01790	-1.04252	2.33343e-05	KEA1	K+ efflux antiporter 1;(source:Araport11)
AT1G01800	0.430195	0.00467946	AT1G01800	NAD(P)-binding Rossmann-fold superfamily protein;(source:Araport11)
AT1G01830	0.379944	0.027161	AT1G01830	ARM repeat superfamily protein;(source:Araport11)
AT1G01860	-0.879683	4.02795e-05	PFC1	Ribosomal RNA adenine dimethylase family protein;(source:Araport11)
AT1G01920	-0.502024	0.00810305	AT1G01920	SET domain-containing protein;(source:Araport11)
AT1G01970	-0.776108	0.00024994	AT1G01970	Tetratricopeptide repeat (TPR)-like superfamily protein;(source:Araport11)
AT1G02010	-0.647817	0.026141	SEC1A	secretory 1A;(source:Araport11)
AT1G02050	-0.661526	0.00934935	LAP6	Chalcone and stilbene synthase family protein;(source:Araport11)
AT1G02060	-0.807681	9.48115e-06	AT1G02060	Tetratricopeptide repeat (TPR)-like superfamily protein;(source:Araport11)
AT1G02065	1.40729	0.0342308	SPL8	squamosa promoter binding protein-like 8;(source:Araport11)
AT1G02150	-0.519686	0.00128729	AT1G02150	Tetratricopeptide repeat (TPR)-like superfamily protein;(source:Araport11)
AT1G02170	1.20868	5.15121e-09	MC1	metacaspase 1;(source:Araport11)
AT1G02205	1.97445	7.47967e-08	CER1	Fatty acid hydroxylase superfamily;(source:Araport11)
AT1G02220	2.08027	8.99395e-06	NAC003	NAC domain containing protein 3;(source:Araport11)
AT1G02230	1.87465	3.41487e-07	NAC004	NAC domain containing protein 4;(source:Araport11)
AT1G02280	-0.673078	0.00413286	TOC33	translocon at the outer envelope membrane of chloroplasts 33;(source:Araport11)
AT1G02290	-0.581676	0.000576292	AT1G02290	hypothetical protein;(source:Araport11)
AT1G02300	-0.649494	0.000106407	AT1G02300	Cysteine proteinases superfamily protein;(source:Araport11)
AT1G02360	2.47664	5.1841e-11	AT1G02360	Chitinase family protein;(source:Araport11)
AT1G02370	-0.756101	0.000113526	AT1G02370	Tetratricopeptide repeat (TPR)-like superfamily protein;(source:Araport11)
AT1G02390	2.27965	9.07093e-06	GPAT2	glycerol-3-phosphate acyltransferase 2;(source:Araport11)
AT1G02400	1.30147	8.19291e-06	GA2OX6	gibberellin 2-oxidase 6;(source:Araport11)
AT1G02405	1.65368	0.00462102	AT1G02405	proline-rich family protein;(source:Araport11)
AT1G02430	1.18844	0.0443238	ARFD1B	ADP-ribosylation factor D1B;(source:Araport11)
AT1G02460	1.54195	2.14111e-05	AT1G02460	Pectin lyase-like superfamily protein;(source:Araport11)
AT1G02470	3.11914	5.19714e-19	AT1G02470	Polyketide cyclase/dehydrase and lipid transport superfamily protein;(source:Araport11)
AT1G02500	1.03587	7.44892e-13	SAM1	S-adenosylmethionine synthetase 1;(source:Araport11)
AT1G02520	0.882438	0.0410563	ABCB11	P-glycoprotein 11;(source:Araport11)
AT1G02580	2.24321	5.14615e-06	MEA	SET domain-containing protein;(source:Araport11)
AT1G02620	-1.39824	2.08188e-06	AT1G02620	Ras-related small GTP-binding family protein;(source:Araport11)
AT1G02650	-0.893106	0.00929381	AT1G02650	Tetratricopeptide repeat (TPR)-like superfamily protein;(source:Araport11)
AT1G02730	1.2686	8.80734e-06	CSLD5	cellulose synthase-like D5;(source:Araport11)
AT1G02810	-1.08906	5.56047e-05	AT1G02810	Plant invertase/pectin methylesterase inhibitor superfamily;(source:Araport11)
AT1G02816	0.48054	0.0152134	AT1G02816	pectinesterase (Protein of unknown function, DUF538);(source:Araport11)
AT1G02850	0.975393	3.39399e-07	BGLU11	beta glucosidase 11;(source:Araport11)
AT1G02870	-0.535595	0.028121	AT1G02870	nucleolar-like protein;(source:Araport11)
AT1G02880	0.510043	0.0224006	TPK1	thiamin pyrophosphokinase1;(source:Araport11)
AT1G02910	-0.627532	0.000675857	LPA1	tetratricopeptide repeat (TPR)-containing protein;(source:Araport11)
AT1G02920	2.47649	4.44522e-07	GSTF7	glutathione S-transferase 7;(source:Araport11)
AT1G02930	2.28364	0.000584547	GSTF6	glutathione S-transferase 6;(source:Araport11)
AT1G03000	-0.443051	0.00153643	PEX6	peroxin 6;(source:Araport11)
AT1G03055	-1.34555	0.00256732	D27	beta-carotene isomerase D27-like protein;(source:Araport11)
AT1G03060	0.628945	5.81399e-05	SPI	BEACH-DOMAIN HOMOLOG A1;(source:Araport11)
AT1G03090	-0.602352	0.00420725	MCCA	methylcrotonyl-CoA carboxylase alpha chain;(source:Araport11)
AT1G03110	-0.444864	0.0327049	TRM82	Transducin/WD40 repeat-like superfamily protein;(source:Araport11)
AT1G03130	-1.1222	2.57998e-07	PSAD-2	photosystem I subunit D-2;(source:Araport11)
AT1G03160	-0.448996	0.011167	FZL	FZO-like protein;(source:Araport11)
AT1G03220	1.85531	2.44048e-07	AT1G03220	Eukaryotic aspartyl protease family protein;(source:Araport11)
AT1G03230	1.38902	1.3194e-11	AT1G03230	Eukaryotic aspartyl protease family protein;(source:Araport11)
AT1G03290	0.754639	0.000505038	AT1G03290	ELKS/Rab6-interacting/CAST family protein;(source:Araport11)
AT1G03300	-0.769005	0.0104175	ATDUF1	agenet domain protein (DOMAIN OF UNKNOWN FUNCTION 724 1);(source:Araport11)
AT1G03310	-0.588955	0.00215606	DBE1	debranching enzyme 1;(source:Araport11)
AT1G03370	0.844509	0.000626487	AT1G03370	C2 calcium/lipid-binding and GRAM domain containing protein;(source:Araport11)
AT1G03380	0.446706	0.00393305	ATG18G	yeast autophagy 18 G-like protein;(source:Araport11)
AT1G03410	-1.03512	1.60824e-07	2A6	2-oxoglutarate (2OG) and Fe(II)-dependent oxygenase superfamily protein;(source:Araport11)
AT1G03430	-0.411454	0.0392782	AHP5	histidine-containing phosphotransfer factor 5;(source:Araport11)
AT1G03457	-0.363194	0.0240429	AT1G03457	RNA-binding (RRM/RBD/RNP motifs) family protein;(source:Araport11)
AT1G03495	2.00752	0.000131511	AT1G03495	HXXXD-type acyl-transferase family protein;(source:Araport11)
AT1G03520	-0.553424	0.0154444	AT1G03520	Core-2/I-branching beta-1,6-N-acetylglucosaminyltransferase family protein;(source:Araport11)
AT1G03530	-0.588405	0.0123111	NAF1	nuclear assembly factor 1;(source:Araport11)
AT1G03540	-0.822534	0.0318355	AT1G03540	Pentatricopeptide repeat (PPR-like) superfamily protein;(source:Araport11)
AT1G03600	-1.09991	9.85853e-05	PSB27	photosystem II family protein;(source:Araport11)
AT1G03630	-1.37969	1.45512e-06	POR C	protochlorophyllide oxidoreductase C;(source:Araport11)
AT1G03660	1.36615	0.0229971	AT1G03660	Ankyrin-repeat containing protein;(source:Araport11)
AT1G03680	-1.06382	5.11506e-07	THM1	thioredoxin M-type 1;(source:Araport11)
AT1G03740	1.01744	2.90544e-08	AT1G03740	Protein kinase superfamily protein;(source:Araport11)
AT1G03760	-0.424376	0.0388474	AT1G03760	Prefoldin chaperone subunit family protein;(source:Araport11)
AT1G03770	0.695695	0.0105249	RING1B	RING 1B;(source:Araport11)
AT1G03780	1.31217	0.000335403	TPX2	targeting protein for XKLP2;(source:Araport11)
AT1G03800	1.65663	2.13907e-05	ERF10	ERF domain protein 10;(source:Araport11)
AT1G03820	1.05956	0.000606289	AT1G03820	E6-like protein;(source:Araport11)
AT1G03840	-1.1692	0.000540093	MGP	C2H2 and C2HC zinc fingers superfamily protein;(source:Araport11)
AT1G03850	1.32242	2.12643e-11	GRXS13	Glutaredoxin family protein;(source:Araport11)
AT1G03870	-0.390491	0.0375286	FLA9	FASCICLIN-like arabinoogalactan 9;(source:Araport11)
AT1G03900	0.607095	7.78929e-05	ABCI18	non-intrinsic ABC protein 4;(source:Araport11)
AT1G03905	1.08737	0.000145705	ABCI19	P-loop containing nucleoside triphosphate hydrolases superfamily protein;(source:Araport11)
AT1G03940	1.19575	0.004259	AT1G03940	HXXXD-type acyl-transferase family protein;(source:Araport11)
AT1G03950	0.524281	0.00172897	VPS2.3	vacuolar protein sorting-associated protein 2.3;(source:Araport11)
AT1G03960	-0.503987	0.0113815	AT1G03960	Calcium-binding EF hand family protein;(source:Araport11)
AT1G03990	3.86548	9.8279e-10	AT1G03990	Long-chain fatty alcohol dehydrogenase family protein;(source:Araport11)
AT1G04020	1.33451	0.00183527	BARD1	breast cancer associated RING 1;(source:Araport11)
AT1G04040	1.03716	2.97721e-06	AT1G04040	HAD superfamily, subfamily IIIB acid phosphatase;(source:Araport11)
AT1G04100	2.05781	4.0211e-11	IAA10	indoleacetic acid-induced protein 10;(source:Araport11)
AT1G04110	1.21005	0.00638065	SDD1	Subtilase family protein;(source:Araport11)
AT1G04120	0.652489	4.75221e-07	ABCC5	multidrug resistance-associated protein 5;(source:Araport11)
AT1G04130	-0.75201	0.00251293	TPR2	Tetratricopeptide repeat (TPR)-like superfamily protein;(source:Araport11)
AT1G04160	0.888309	0.00639792	XIB	myosin XI B;(source:Araport11)
AT1G04200	0.988944	2.99481e-05	AT1G04200	dyggve-melchior-clausen syndrome protein;(source:Araport11)
AT1G04240	-1.52552	1.58552e-08	SHY2	AUX/IAA transcriptional regulator family protein;(source:Araport11)
AT1G04250	-0.47382	0.0306363	AXR3	AUX/IAA transcriptional regulator family protein;(source:Araport11)
AT1G04350	-1.18107	4.676e-05	AT1G04350	2-oxoglutarate (2OG) and Fe(II)-dependent oxygenase superfamily protein;(source:Araport11)
AT1G04390	-0.471652	0.0335062	AT1G04390	BTB/POZ domain-containing protein;(source:Araport11)
AT1G04420	-0.533615	0.0108684	AT1G04420	NAD(P)-linked oxidoreductase superfamily protein;(source:Araport11)
AT1G04440	0.797312	3.83897e-06	CKL13	casein kinase like 13;(source:Araport11)
AT1G04530	-0.570591	0.0010873	TPR4	Tetratricopeptide repeat (TPR)-like superfamily protein;(source:Araport11)
AT1G04550	-0.752213	3.60228e-05	IAA12	AUX/IAA transcriptional regulator family protein;(source:Araport11)
AT1G04555	0.68541	0.00435144	AT1G04555	transmembrane protein;(source:Araport11)
AT1G04560	-1.93945	0.00369045	AT1G04560	AWPM-19-like family protein;(source:Araport11)
AT1G04580	2.51541	0.000128447	AO4	aldehyde oxidase 4;(source:Araport11)
AT1G04620	-0.698985	0.00402899	HCAR	coenzyme F420 hydrogenase family / dehydrogenase, beta subunit family;(source:Araport11)
AT1G04640	-1.28065	2.42245e-05	LIP2	lipoyltransferase 2;(source:Araport11)
AT1G04730	1.56005	6.93841e-07	CTF18	P-loop containing nucleoside triphosphate hydrolases superfamily protein;(source:Araport11)
AT1G04770	-1.38932	1.21946e-05	AT1G04770	Tetratricopeptide repeat (TPR)-like superfamily protein;(source:Araport11)
AT1G04780	0.438011	0.0141018	AT1G04780	Ankyrin repeat family protein;(source:Araport11)
AT1G04820	0.490607	0.0338729	TUA4	tubulin alpha-4 chain;(source:Araport11)
AT1G04850	0.626623	7.20563e-07	AT1G04850	ubiquitin-associated (UBA)/TS-N domain-containing protein;(source:Araport11)
AT1G04880	-1.92819	0.00300854	AT1G04880	HMG (high mobility group) box protein with ARID/BRIGHT DNA-binding domain-containing protein;(source:Araport11)
AT1G04945	-0.652364	0.00241712	AT1G04945	HIT-type Zinc finger family protein;(source:Araport11)
AT1G04950	-0.436112	0.0158407	TAFII59	TATA BOX ASSOCIATED FACTOR II 59;(source:Araport11)
AT1G04960	0.590303	0.021454	AT1G04960	golgin family A protein (DUF1664);(source:Araport11)
AT1G04970	0.531734	0.0242432	AT1G04970	lipid-binding serum glycoprotein family protein;(source:Araport11)
AT1G04980	2.38993	9.1501e-12	PDIL2-2	PDI-like 2-2;(source:Araport11)
AT1G04990	1.36908	1.48061e-10	AT1G04990	Zinc finger C-x8-C-x5-C-x3-H type family protein;(source:Araport11)
AT1G05000	0.771871	0.0323719	PFA-DSP1	Phosphotyrosine protein phosphatases superfamily protein;(source:Araport11)
AT1G05100	1.97801	0.00166119	MAPKKK18	mitogen-activated protein kinase kinase kinase 18;(source:Araport11)
AT1G05140	-0.805936	1.69144e-06	AT1G05140	Peptidase M50 family protein;(source:Araport11)
AT1G05160	-0.481818	0.0456645	CYP88A3	cytochrome P450, family 88, subfamily A, polypeptide 3;(source:Araport11)
AT1G05170	0.374364	0.0402355	AT1G05170	Galactosyltransferase family protein;(source:Araport11)
AT1G05190	-1.09285	9.82414e-09	emb2394	Ribosomal protein L6 family;(source:Araport11)
AT1G05200	-0.760324	0.000570474	GLR3.4	glutamate receptor 3.4;(source:Araport11)
AT1G05205	0.647651	0.0236025	AT1G05205	hexokinase-1 protein;(source:Araport11)
AT1G05280	1.38283	0.0266746	AT1G05280	ERV-F (C)1 provirus ancestral Env polyprotein, putative (DUF604);(source:Araport11)
AT1G05350	0.439563	0.0173121	AT1G05350	NAD(P)-binding Rossmann-fold superfamily protein;(source:Araport11)
AT1G05385	-1.28963	2.62812e-06	LPA19	photosystem II 11 kDa protein-like protein;(source:Araport11)
AT1G05450	0.93234	0.00570587	AT1G05450	Bifunctional inhibitor/lipid-transfer protein/seed storage 2S albumin superfamily protein;(source:Araport11)
AT1G05460	-0.532967	0.011694	SDE3	P-loop containing nucleoside triphosphate hydrolases superfamily protein;(source:Araport11)
AT1G05575	1.02831	0.00237293	AT1G05575	transmembrane protein;(source:Araport11)
AT1G05590	-0.730761	2.25612e-05	HEXO2	beta-hexosaminidase 2;(source:Araport11)
AT1G05600	-1.02497	0.000121514	EMB3101	Tetratricopeptide repeat (TPR)-like superfamily protein;(source:Araport11)
AT1G05620	1.69635	3.4628e-09	URH2	uridine-ribohydrolase 2;(source:Araport11)
AT1G05670	-0.618388	0.00797018	AT1G05670	Pentatricopeptide repeat (PPR-like) superfamily protein;(source:Araport11)
AT1G05675	2.98944	3.73761e-15	AT1G05675	UDP-Glycosyltransferase superfamily protein;(source:Araport11)
AT1G05680	1.31228	0.00113345	UGT74E2	Uridine diphosphate glycosyltransferase 74E2;(source:Araport11)
AT1G05690	-0.651666	0.0453238	BT3	BTB and TAZ domain protein 3;(source:Araport11)
AT1G05710	0.859011	1.18697e-05	AT1G05710	basic helix-loop-helix (bHLH) DNA-binding superfamily protein;(source:Araport11)
AT1G05720	0.367295	0.0314276	AT1G05720	selenoprotein family protein;(source:Araport11)
AT1G05800	2.45614	0.00218075	DGL	alpha/beta-Hydrolases superfamily protein;(source:Araport11)
AT1G05805	-0.409354	0.0170193	AT1G05805	basic helix-loop-helix (bHLH) DNA-binding superfamily protein;(source:Araport11)
AT1G05880	2.00747	0.000156901	ARI12	RING/U-box superfamily protein;(source:Araport11)
AT1G05900	-0.6943	0.00746393	NTH2	endonuclease III 2;(source:Araport11)
AT1G06000	0.969557	0.00285669	AT1G06000	UDP-Glycosyltransferase superfamily protein;(source:Araport11)
AT1G06040	-0.919792	3.68053e-05	STO	B-box zinc finger family protein;(source:Araport11)
AT1G06080	2.10849	1.55034e-08	ADS1	delta 9 desaturase 1;(source:Araport11)
AT1G06120	-2.22405	0.00125295	AT1G06120	Fatty acid desaturase family protein;(source:Araport11)
AT1G06135	2.67202	0.000143829	AT1G06135	transmembrane protein;(source:Araport11)
AT1G06137	4.25611	3.79725e-14	AT1G06137	transmembrane protein;(source:Araport11)
AT1G06160	2.98906	2.2972e-36	ORA59	octadecanoid-responsive AP2/ERF 59;(source:Araport11)
AT1G06180	2.44537	1.37791e-12	MYB13	myb domain protein 13;(source:Araport11)
AT1G06190	-0.592876	0.00121489	RHON1	Rho termination factor;(source:Araport11)
AT1G06220	-0.461839	0.00704757	MEE5	Ribosomal protein S5/Elongation factor G/III/V family protein;(source:Araport11)
AT1G06240	-0.78604	0.00321743	AT1G06240	diiron containing four-helix bundle family ferritin protein, putative (Protein of unknown function DUF455);(source:Araport11)
AT1G06290	0.683375	0.000372858	ACX3	acyl-CoA oxidase 3;(source:Araport11)
AT1G06360	1.04179	0.00257529	AT1G06360	Fatty acid desaturase family protein;(source:Araport11)
AT1G06380	-0.744757	0.000738861	AT1G06380	Ribosomal protein L1p/L10e family;(source:Araport11)
AT1G06460	-1.6042	2.38428e-13	ACD32.1	alpha-crystallin domain 32.1;(source:Araport11)
AT1G06515	0.469479	0.00291678	AT1G06515	transmembrane protein, putative (DUF3317);(source:Araport11)
[truncated: 8,406 more rows]
