# Supplementary material for: Seed Transmission of Pathogens: Non-Canonical Immune Response in Arabidopsis Germinating Seeds Compared to Early Seedlings against the Necrotrophic Fungus Alternaria brassicicola
Source: Plants (Basel). 2022 Jun 28;11(13):1708. doi: 10.3390/plants11131708 (PMC9269218; doi:10.3390/plants11131708)
Supplement: Supplementary file 1 [file plants-11-01708-s001.zip › Supplementary Table S2. Enriched GO terms analysis .xlsx]

## Sheet: Upregulated
Supplementary Table S2: Enriched GO terms analysis of differentially expressed genes (DEGs) between healthy and A. brassicicola infected conditions at 3, 6 and 10 days after sowing (DAS) and their respective statistics (GeneRatio, BgRatio, p-adjust, qvalue, richFactor and FoldEnrichment). Enriched GO terms analysis was performed using the ClusterProfiler algorithm applied p-value cut-off of <0.5 …
Genes upregulated
Cluster	GO ID	GO term	GeneRatio	BgRatio	p-adjust	qvalue	richFactor	FoldEnrichment	geneID
3 DAS	GO:0071456	cellular response to hypoxia	100/1263	242/21670	4.54854740908191e-56	4.18875805800676e-56	0.413223140495868	7.0899013891888	AT4G31970/AT1G26380/AT1G26410/AT1G14550/AT5G64905/AT5G57220/AT5G20230/AT2G26560/AT1G57630/AT1G14540/AT5G25250/AT2G23270/AT5G27420/AT3G03670/AT3G02550/AT1G19530/AT5G57510/AT2G25735/AT1G33055/AT4G10265/AT2G14247/AT1G76650/AT4G26270/AT5G39890/AT4G33560/AT4G24110/AT3G10040/AT5G15120/AT5G26920/AT2G16060/AT1G03220/AT2G41100/AT1G27730/AT4G27450/AT3G27220/AT5G66985/AT3G47720/AT1G07135/AT1G77120/AT3G43190…
3 DAS	GO:0042742	defense response to bacterium	66/1263	416/21670	2.46053039814363e-11	2.26590284881191e-11	0.158653846153846	2.72211310067605	AT2G30750/AT2G30770/AT3G49110/AT1G66700/AT5G40990/AT4G23280/AT5G65600/AT5G57220/AT4G28460/AT5G46350/AT4G11470/AT1G53990/AT1G18570/AT4G26120/AT5G27420/AT4G29050/AT5G01540/AT2G38470/AT4G23810/AT2G19190/AT1G80840/AT5G47220/AT4G11480/AT5G07690/AT1G22890/AT4G39950/AT4G23150/AT5G26920/AT3G54640/AT5G05300/AT5G39670/AT2G22330/AT3G10930/AT5G44585/AT1G32960/AT4G23260/AT5G01560/AT5G22540/AT3G59750/AT1G73805…
3 DAS	GO:0042430	indole-containing compound metabolic process	25/1263	79/21670	2.49141144916772e-10	2.294341213785e-10	0.316455696202532	5.42960802589775	AT2G30770/AT1G21100/AT1G21120/AT3G26830/AT2G43000/AT5G57220/AT1G18570/AT1G25220/AT2G38470/AT5G05730/AT2G24180/AT4G39950/AT3G54640/AT5G54810/AT4G30530/AT2G22330/AT2G04400/AT5G17990/AT2G40000/AT4G27070/AT4G34180/AT4G31500/AT5G44070/AT1G59870/AT3G05290
3 DAS	GO:0019748	secondary metabolic process	52/1263	367/21670	4.58368371320488e-07	4.2211150862593e-07	0.141689373297003	2.43104411666354	AT2G30770/AT3G60120/AT1G67980/AT1G69920/AT1G21100/AT1G21120/AT2G02930/AT1G02920/AT1G02930/AT3G26830/AT2G43000/AT5G05340/AT5G57220/AT5G20230/AT5G24550/AT1G69930/AT2G29460/AT4G19370/AT1G64160/AT4G02520/AT1G18570/AT1G02940/AT2G38470/AT1G74590/AT1G80820/AT5G07690/AT4G39950/AT3G53160/AT5G64120/AT4G30530/AT2G22330/AT1G16410/AT1G61810/AT4G39940/AT4G30210/AT5G48100/AT5G04760/AT4G39230/AT1G18590/AT4G00040…
3 DAS	GO:0052544	defense response by callose deposition in cell wall	9/1263	16/21670	7.52550687119463e-06	6.93024051686521e-06	0.5625	9.65112826603326	AT5G57220/AT1G18570/AT4G39950/AT3G54640/AT2G22330/AT4G31500/AT5G44070/AT1G59870/AT1G24100
3 DAS	GO:0009611	response to wounding	36/1263	243/21670	1.98247590867619e-05	1.82566239074285e-05	0.148148148148148	2.54186094249435	AT5G40990/AT1G21120/AT3G54150/AT5G20230/AT1G21110/AT2G38870/AT1G72520/AT3G15356/AT5G05730/AT1G80840/AT5G07690/AT1G76650/AT1G27730/AT2G22330/AT5G64900/AT4G17980/AT1G17380/AT1G72920/AT4G11280/AT5G47910/AT5G07310/AT1G30135/AT5G54170/AT1G76930/AT5G57390/AT1G16090/AT3G51450/AT1G72450/AT1G44830/AT1G19180/AT5G10510/AT5G22500/AT1G74100/AT1G78080/AT4G39980/AT2G02860
3 DAS	GO:0080134	regulation of response to stress	49/1263	408/21670	8.98129183537383e-05	8.2708731300936e-05	0.120098039215686	2.06058947727943	AT5G40990/AT3G26830/AT5G65600/AT2G29460/AT5G46350/AT2G41230/AT1G56060/AT4G23810/AT1G80840/AT5G47220/AT5G07690/AT3G10040/AT5G26920/AT3G53160/AT5G05300/AT1G77120/AT5G39670/AT2G22330/AT4G39830/AT5G52050/AT3G10930/AT5G44585/AT1G17380/AT3G55970/AT1G73805/AT1G30135/AT3G18690/AT5G20480/AT1G72450/AT1G44830/AT1G19180/AT3G11820/AT1G14370/AT4G12720/AT5G65050/AT2G39660/AT3G15210/AT4G17870/AT1G20900/AT5G20150…
3 DAS	GO:0009723	response to ethylene	28/1263	178/21670	0.000101732923043833	9.36858655828435e-05	0.157303370786517	2.69894223669344	AT5G40990/AT3G23230/AT2G41230/AT1G15520/AT4G17490/AT3G15356/AT1G25220/AT5G05730/AT5G47220/AT5G07690/AT2G31230/AT1G65484/AT4G02380/AT5G10520/AT5G64900/AT5G47230/AT2G33710/AT4G11280/AT5G25190/AT3G51450/AT1G28360/AT3G23150/AT3G15210/AT4G38495/AT1G78080/AT1G50640/AT5G25350/AT1G31930
3 DAS	GO:0010200	response to chitin	8/1263	32/21670	0.0097957895279685	0.00902094418932271	0.25	4.28939034045922	AT3G16530/AT3G15356/AT1G27730/AT2G37430/AT5G25910/AT3G55980/AT2G40140/AT1G59870
3 DAS	GO:0002252	immune effector process	6/1263	18/21670	0.0097957895279685	0.00902094418932271	0.333333333333333	5.7191871206123	AT5G40990/AT5G47220/AT2G35930/AT3G11840/AT3G52450/AT3G15210
3 DAS	GO:0016998	cell wall macromolecule catabolic process	8/1263	33/21670	0.0120374304768291	0.0110852717082466	0.242424242424242	4.15940881499076	AT2G43620/AT2G43570/AT3G47540/AT2G43590/AT5G09730/AT1G02360/AT4G01700/AT1G56680
3 DAS	GO:0046618	xenobiotic export	10/1263	50/21670	0.0123221047419934	0.0113474282859121	0.2	3.43151227236738	AT4G21903/AT3G23550/AT2G04040/AT5G52050/AT2G04050/AT1G33110/AT3G26590/AT1G15170/AT4G23030/AT5G52450
3 DAS	GO:0048544	recognition of pollen	10/1263	50/21670	0.0123221047419934	0.0113474282859121	0.2	3.43151227236738	AT1G61440/AT1G61420/AT1G61550/AT1G61400/AT1G11300/AT4G21380/AT1G61430/AT1G61360/AT4G21390/AT1G11330
3 DAS	GO:0008037	cell recognition	10/1263	52/21670	0.0163617440121496	0.0150675327549832	0.192307692307692	3.29953103112248	AT1G61440/AT1G61420/AT1G61550/AT1G61400/AT1G11300/AT4G21380/AT1G61430/AT1G61360/AT4G21390/AT1G11330
3 DAS	GO:0043574	peroxisomal transport	6/1263	20/21670	0.0163617440121496	0.0150675327549832	0.3	5.14726840855107	AT3G10572/AT5G23395/AT3G04460/AT5G17550/AT3G18160/AT5G56290
3 DAS	GO:0007031	peroxisome organization	8/1263	39/21670	0.0300715935367164	0.027692935439679	0.205128205128205	3.51949976653065	AT2G01450/AT3G47430/AT5G23395/AT3G04460/AT5G17550/AT3G05290/AT3G18160/AT5G56290
3 DAS	GO:0006949	syncytium formation	5/1263	16/21670	0.0314883089900112	0.0289975889339007	0.3125	5.36173792557403	AT1G26770/AT4G38210/AT1G69530/AT2G39700/AT2G37640
6 DAS	GO:0071456	cellular response to hypoxia	167/3481	242/21670	4.02202403878694e-73	3.11226278422677e-73	0.690082644628099	4.29591810085921	AT4G31970/AT1G26380/AT1G14550/AT4G37710/AT1G26410/AT2G23270/AT1G57630/AT5G64905/AT5G42380/AT1G14540/AT5G57220/AT5G25250/AT3G46080/AT5G57510/AT2G26560/AT3G03670/AT4G01360/AT1G66090/AT1G05880/AT5G27420/AT5G20230/AT1G19020/AT1G73010/AT1G72920/AT2G46400/AT1G27730/AT5G54490/AT1G07135/AT5G26920/AT2G47520/AT2G32210/AT1G68620/AT1G15010/AT5G66650/AT5G58120/AT3G25250/AT5G59820/AT4G26270/AT2G41100/AT5G47910…
6 DAS	GO:0042742	defense response to bacterium	195/3481	416/21670	1.24922203144821e-47	9.66654400923233e-48	0.46875	2.91807311117495	AT2G30770/AT2G30750/AT5G40990/AT1G66700/AT4G23150/AT3G49110/AT1G32960/AT5G65600/AT4G11480/AT4G11470/AT5G13320/AT5G57220/AT4G39950/AT4G23280/AT5G39670/AT5G05300/AT3G56710/AT5G27420/AT1G55020/AT5G46350/AT5G22540/AT3G54640/AT2G19190/AT3G14460/AT5G01540/AT2G46400/AT2G38470/AT4G28460/AT2G22330/AT5G26920/AT4G26120/AT1G68765/AT1G18570/AT2G45220/AT4G28350/AT5G47220/AT1G19180/AT4G23190/AT3G04720/AT1G80840…
6 DAS	GO:0009620	response to fungus	176/3481	353/21670	1.24922203144821e-47	9.66654400923233e-48	0.498583569405099	3.10379372278325	AT2G30770/AT1G79680/AT5G40990/AT1G66700/AT2G38240/AT3G49110/AT3G26830/AT1G24140/AT5G57220/AT3G55970/AT5G39580/AT4G12490/AT3G04220/AT5G66890/AT1G21250/AT2G43580/AT5G46350/AT2G31865/AT2G38470/AT2G14560/AT2G38870/AT5G26920/AT1G05800/AT5G61890/AT4G26120/AT1G28190/AT1G15010/AT2G45220/AT2G34930/AT5G26170/AT5G47910/AT5G64750/AT3G52400/AT3G06490/AT4G20830/AT1G80840/AT4G20970/AT2G43510/AT5G05600/AT5G64120…
6 DAS	GO:0009611	response to wounding	121/3481	243/21670	2.81463556025557e-32	2.17797940063697e-32	0.497942386831276	3.09980221851013	AT5G40990/AT3G53600/AT1G72520/AT1G17380/AT1G30135/AT3G54150/AT4G11280/AT1G61120/AT1G21120/AT3G15356/AT5G43570/AT1G55020/AT5G44420/AT5G05730/AT5G20230/AT1G19020/AT1G72920/AT1G27730/AT2G22330/AT2G38870/AT1G05800/AT3G25250/AT1G21110/AT3G61190/AT5G59820/AT5G47910/AT1G19180/AT1G76650/AT1G76930/AT1G80840/AT2G27690/AT1G74100/AT5G07310/AT2G42440/AT1G61340/AT1G16090/AT1G06160/AT1G17420/AT1G51760/AT3G51450…
6 DAS	GO:0080134	regulation of response to stress	147/3481	408/21670	5.73363804841866e-21	4.43671846419447e-21	0.360294117647059	2.24291109721682	AT5G40990/AT2G38240/AT5G65600/AT3G53600/AT5G13320/AT1G56060/AT3G26830/AT3G55970/AT1G17380/AT2G29460/AT1G30135/AT5G39670/AT5G05300/AT3G53160/AT2G41230/AT5G46350/AT5G43410/AT2G31865/AT2G46400/AT2G22330/AT4G11890/AT5G26920/AT2G41225/AT5G52050/AT3G61190/AT5G47220/AT1G19180/AT2G29350/AT3G52400/AT1G80840/AT5G05600/AT3G59700/AT4G39830/AT3G22600/AT1G07000/AT4G01895/AT1G08860/AT3G10930/AT4G23810/AT2G31880…
6 DAS	GO:0070542	response to fatty acid	92/3481	208/21670	8.25915542492095e-20	6.39097673465889e-20	0.442307692307692	2.7534638587497	AT2G39030/AT1G15520/AT2G38240/AT3G53600/AT3G55970/AT1G17380/AT1G30135/AT4G11280/AT3G23240/AT1G61120/AT3G15356/AT1G55020/AT5G44420/AT1G47510/AT5G07010/AT2G46400/AT4G26120/AT5G26170/AT5G47220/AT1G19180/AT1G76930/AT3G52400/AT1G74100/AT5G05600/AT1G61340/AT1G06160/AT1G17420/AT3G51450/AT1G70170/AT3G44860/AT4G34710/AT3G50480/AT4G23810/AT1G28480/AT3G15500/AT5G13220/AT4G20860/AT1G20510/AT3G45140/AT5G64900…
6 DAS	GO:0008219	cell death	86/3481	199/21670	8.0425883600457e-18	6.22339603156003e-18	0.4321608040201	2.69029722008491	AT5G65600/AT5G13320/AT2G26560/AT4G23280/AT3G50930/AT4G37990/AT3G25250/AT5G47910/AT3G52400/AT1G16420/AT1G08860/AT4G23170/AT2G31880/AT4G25110/AT4G23210/AT1G19250/AT5G13190/AT1G72940/AT5G20480/AT1G73260/AT5G10380/AT4G34180/AT4G16660/AT5G39610/AT5G47120/AT3G50260/AT5G64530/AT4G12720/AT1G28380/AT3G11820/AT2G13790/AT1G02170/AT1G29690/AT3G52430/AT3G57330/AT3G54420/AT3G20600/AT3G44880/AT1G59870/AT3G13610…
6 DAS	GO:0042430	indole-containing compound metabolic process	47/3481	79/21670	2.08477043161477e-16	1.6132060289545e-16	0.594936708860759	3.70361346768534	AT2G30770/AT3G26830/AT5G57220/AT2G43000/AT1G21120/AT4G39950/AT1G21100/AT2G24180/AT1G25220/AT5G05730/AT3G54640/AT2G38470/AT2G22330/AT5G17990/AT1G18570/AT4G27070/AT3G55840/AT2G04400/AT5G54810/AT4G30530/AT1G44542/AT4G31500/AT4G34410/AT2G20610/AT3G44300/AT4G34180/AT4G23100/AT5G05590/AT1G73500/AT2G40000/AT3G56400/AT3G52430/AT4G27260/AT5G27520/AT1G05680/AT1G59870/AT3G45640/AT5G44070/AT1G27130/AT1G32640…
6 DAS	GO:0019748	secondary metabolic process	125/3481	367/21670	8.9846212102704e-16	6.95234587198855e-16	0.340599455040872	2.1203074377293	AT2G30770/AT3G60120/AT1G67980/AT1G69930/AT1G69920/AT1G64160/AT1G02920/AT3G26830/AT2G29470/AT5G05340/AT1G02930/AT5G57220/AT2G29460/AT2G02930/AT2G43000/AT1G21120/AT4G39950/AT1G21100/AT4G02520/AT3G53160/AT1G74590/AT1G18590/AT4G37990/AT5G20230/AT2G38470/AT2G22330/AT4G39940/AT1G18570/AT1G65860/AT1G80820/AT1G61820/AT3G60140/AT4G30530/AT4G19370/AT5G24540/AT5G24550/AT1G74100/AT5G64120/AT1G61810/AT1G24100…
6 DAS	GO:0044282	small molecule catabolic process	90/3481	246/21670	2.10279557774842e-13	1.62715397927778e-13	0.365853658536585	2.27752047701459	AT2G02010/AT4G39950/AT1G47510/AT2G22330/AT3G55840/AT3G21780/AT4G26260/AT5G38710/AT4G34710/AT1G44542/AT5G07440/AT1G02400/AT5G17380/AT1G77120/AT1G64660/AT4G34180/AT5G18170/AT3G53260/AT5G53970/AT5G63980/AT4G10500/AT2G40000/AT4G16760/AT5G45340/AT3G58750/AT2G37040/AT5G27520/AT3G02360/AT5G54390/AT1G06570/AT1G17290/AT5G46180/AT4G26910/AT4G18010/AT4G19230/AT3G47800/AT5G17330/AT1G30040/AT2G16500/AT3G22200…
6 DAS	GO:0051702	biological process involved in interaction with symbiont	39/3481	67/21670	2.77476938708143e-13	2.14713075181666e-13	0.582089552238806	3.62363705745904	AT5G13320/AT2G26560/AT3G50930/AT4G37990/AT3G52400/AT4G23210/AT1G19250/AT5G13190/AT5G20480/AT5G03160/AT4G12720/AT1G28380/AT3G11820/AT1G29690/AT3G54420/AT3G20600/AT1G59870/AT5G46180/AT4G17720/AT1G14780/AT4G26090/AT5G61900/AT1G71220/AT4G25230/AT5G22290/AT4G37980/AT1G64460/AT5G45250/AT4G24290/AT5G64930/AT1G08450/AT3G48090/AT1G29340/AT5G44870/AT1G12220/AT3G25070/AT4G20380/AT4G31300/AT3G46530
6 DAS	GO:0009991	response to extracellular stimulus	89/3481	275/21670	5.09575084014276e-10	3.94311807799435e-10	0.323636363636364	2.01470841712152	AT1G15520/AT3G49620/AT3G53600/AT2G47190/AT5G27420/AT1G73010/AT1G29290/AT5G13080/AT1G62300/AT2G14610/AT1G14040/AT1G43910/AT2G03250/AT1G67070/AT1G18390/AT2G20610/AT3G56970/AT1G55920/AT1G64660/AT1G26730/AT1G66180/AT4G14680/AT1G68320/AT4G02380/AT4G17615/AT2G25690/AT4G27460/AT1G35350/AT1G71040/AT1G69480/AT1G47395/AT3G05630/AT3G06420/AT3G55880/AT1G05680/AT2G19590/AT3G13610/AT1G22500/AT1G73730/AT1G21400…
6 DAS	GO:0052542	defense response by callose deposition	21/3481	29/21670	8.12538436784788e-10	6.28746400611221e-10	0.724137931034483	4.50791984071165	AT5G57220/AT4G39950/AT3G54640/AT2G22330/AT1G18570/AT1G24100/AT4G31500/AT4G23100/AT1G51800/AT1G28380/AT5G61010/AT5G58430/AT1G59870/AT3G29400/AT5G44070/AT1G27130/AT1G66340/AT5G46330/AT2G44490/AT4G03550/AT5G66850
6 DAS	GO:0036503	ERAD pathway	34/3481	66/21670	9.93135433625748e-10	7.68493280985601e-10	0.515151515151515	3.2069328736953	AT1G09080/AT1G65040/AT5G42020/AT5G28540/AT5G61790/AT4G32670/AT5G35080/AT5G47420/AT1G18260/AT1G71220/AT1G19310/AT1G56340/AT3G53230/AT1G08450/AT4G29330/AT4G29960/AT1G09210/AT1G30000/AT4G08320/AT4G15420/AT4G21810/AT5G42220/AT5G03340/AT5G50430/AT3G09840/AT3G57340/AT5G15400/AT2G44410/AT4G34100/AT1G16900/AT5G07340/AT4G04860/AT2G21270/AT3G58030
6 DAS	GO:0007568	aging	64/3481	177/21670	1.7466941407164e-09	1.35160086492626e-09	0.361581920903955	2.25092795920388	AT3G49620/AT2G35980/AT5G24110/AT2G43000/AT2G43570/AT3G21520/AT2G29350/AT3G60140/AT4G18170/AT5G39520/AT1G70170/AT4G23810/AT1G34180/AT4G30270/AT1G69490/AT5G17860/AT3G10985/AT5G59220/AT2G39200/AT5G08790/AT4G01250/AT5G39610/AT1G64360/AT4G02380/AT4G10500/AT2G13790/AT1G73500/AT3G56400/AT3G52430/AT5G02760/AT3G02150/AT5G51640/AT4G05320/AT1G17020/AT3G62770/AT5G13180/AT5G14930/AT2G22300/AT5G08560/AT3G56240…
6 DAS	GO:0046777	protein autophosphorylation	58/3481	189/21670	6.13186999709972e-06	4.74487238406611e-06	0.306878306878307	1.91038578283623	AT3G59700/AT5G59700/AT3G04690/AT3G09010/AT5G58350/AT1G11050/AT1G56130/AT3G50310/AT1G16130/AT1G16670/AT5G25440/AT2G30040/AT4G23250/AT4G21940/AT1G53430/AT1G18890/AT4G28490/AT3G21630/AT1G56145/AT1G35670/AT1G73500/AT1G56140/AT2G46500/AT1G09970/AT5G60280/AT5G24430/AT5G03730/AT2G39660/AT1G61380/AT5G66210/AT2G17520/AT3G20410/AT2G23200/AT1G76040/AT5G12480/AT3G24550/AT3G45410/AT1G08720/AT1G53440/AT4G39270…
6 DAS	GO:0010038	response to metal ion	61/3481	206/21670	1.15248725325943e-05	8.91800534513181e-06	0.296116504854369	1.84339116926003	AT1G02920/AT1G02930/AT5G22530/AT2G26560/AT4G25100/AT2G43570/AT2G37430/AT4G02520/AT1G75040/AT2G26530/AT1G70170/AT5G39030/AT1G08860/AT1G67070/AT3G22890/AT4G11850/AT2G30860/AT4G23100/AT4G25380/AT2G23150/AT4G21680/AT5G39020/AT3G51920/AT5G65140/AT2G39450/AT2G37330/AT1G17290/AT5G11670/AT5G03630/AT5G13740/AT1G08830/AT3G51860/AT3G57480/AT1G34370/AT3G15352/AT5G44070/AT5G53550/AT5G61900/AT5G61910/AT3G56240…
6 DAS	GO:0048193	Golgi vesicle transport	54/3481	182/21670	4.03806226503353e-05	3.12467324577322e-05	0.296703296703297	1.84704407916129	AT1G18830/AT1G09180/AT3G10780/AT5G39630/AT3G15980/AT4G39890/AT1G21900/AT2G36300/AT1G47560/AT5G64990/AT1G26690/AT5G16830/AT3G44340/AT1G14010/AT1G59820/AT3G07680/AT1G11890/AT4G30240/AT3G52850/AT3G24350/AT3G47700/AT1G11905/AT5G52210/AT4G02350/AT4G04910/AT5G05760/AT1G62020/AT2G01470/AT3G55600/AT5G43670/AT3G59500/AT3G60860/AT5G42570/AT1G47550/AT2G34840/AT1G31780/AT2G14720/AT4G14160/AT1G67930/AT1G15880…
6 DAS	GO:0030001	metal ion transport	60/3481	223/21670	0.000287716540845491	0.000222636531717487	0.269058295964126	1.67494779475513	AT1G15520/AT2G29110/AT2G29100/AT3G22910/AT4G36820/AT3G63380/AT5G20230/AT4G13420/AT3G46900/AT5G11210/AT5G66650/AT2G29410/AT5G48400/AT2G29120/AT5G48410/AT2G24710/AT5G46370/AT2G04040/AT2G23150/AT5G59520/AT4G17615/AT1G47395/AT2G42950/AT1G35670/AT3G57330/AT2G07773/AT4G08230/AT1G59870/AT1G09575/AT3G51860/AT4G29900/AT4G37640/AT5G17850/AT1G30270/AT2G26650/AT2G21120/AT1G01140/AT2G04305/AT1G27770/AT1G07670…
6 DAS	GO:0072659	protein localization to plasma membrane	11/3481	19/21670	0.000439027158009344	0.00033972146162245	0.578947368421053	3.6040762636266	AT5G25250/AT5G25260/AT5G64870/AT3G11820/AT2G33120/AT5G52210/AT4G04910/AT5G06970/AT3G60860/AT1G15130/AT1G04750
6 DAS	GO:0048544	recognition of pollen	20/3481	50/21670	0.000479556507407079	0.00037108327959844	0.4	2.49008905486929	AT1G61610/AT4G21390/AT1G61550/AT1G61360/AT1G61440/AT4G21380/AT1G61400/AT1G61370/AT1G11300/AT2G19130/AT4G27300/AT1G47560/AT1G11330/AT1G61380/AT1G61430/AT1G34300/AT1G71820/AT4G02350/AT1G47550/AT5G49830
6 DAS	GO:0046149	pigment catabolic process	11/3481	22/21670	0.00199666382087168	0.00154502868266923	0.5	3.11261131858661	AT3G03470/AT3G44880/AT5G13800/AT1G19670/AT4G22920/AT1G20780/AT3G04060/AT5G43430/AT5G43860/AT3G03890/AT1G27320
6 DAS	GO:0046618	xenobiotic export	17/3481	50/21670	0.0101198468561315	0.00783078928635928	0.34	2.1165756966389	AT5G52050/AT1G71140/AT4G23030/AT3G23550/AT1G66780/AT4G21903/AT1G66760/AT2G04040/AT2G04050/AT1G33110/AT2G04100/AT3G21690/AT1G15170/AT5G44050/AT5G52450/AT4G25640/AT5G65380
6 DAS	GO:0015748	organophosphate ester transport	16/3481	46/21670	0.0104655140924904	0.00809826836283215	0.347826086956522	2.16529483032112	AT3G25610/AT5G13490/AT1G13210/AT1G61800/AT5G04930/AT3G12740/AT5G27520/AT4G28390/AT5G33320/AT1G17500/AT5G44240/AT1G59820/AT5G48970/AT1G26130/AT4G39850/AT2G39970
6 DAS	GO:0006620	posttranslational protein targeting to endoplasmic reticulum membrane	8/3481	16/21670	0.0115131372017972	0.00890892448610454	0.5	3.11261131858661	AT3G60540/AT1G29310/AT4G24920/AT4G21180/AT4G08320/AT2G45070/AT1G01910/AT2G34250
6 DAS	GO:0034765	regulation of ion transmembrane transport	10/3481	23/21670	0.0115882369826718	0.00896703708087415	0.434782608695652	2.7066185379014	AT5G20480/AT1G35670/AT3G15340/AT5G46330/AT2G17290/AT1G02410/AT4G05590/AT4G27500/AT5G62000/AT4G28610
6 DAS	GO:0055074	calcium ion homeostasis	19/3481	60/21670	0.013230095162082	0.0102375153424357	0.316666666666667	1.97132050177152	AT2G29110/AT2G29100/AT4G36820/AT5G11210/AT5G66650/AT5G48400/AT2G29120/AT5G48410/AT2G24710/AT4G08230/AT1G09575/AT3G51860/AT1G56340/AT1G08450/AT1G07670/AT3G13320/AT1G42540/AT1G04400/AT1G07810
6 DAS	GO:0055081	anion homeostasis	11/3481	28/21670	0.0169532437071098	0.0131185067400736	0.392857142857143	2.44562317888948	AT1G14040/AT3G47420/AT1G68320/AT5G04340/AT3G57330/AT3G51860/AT3G17790/AT1G07240/AT3G02040/AT1G30450/AT4G28610
6 DAS	GO:0005992	trehalose biosynthetic process	8/3481	17/21670	0.0169532437071098	0.0131185067400736	0.470588235294118	2.92951653514034	AT2G43000/AT1G22210/AT1G35910/AT4G22590/AT5G65140/AT5G10100/AT1G60140/AT2G22190
6 DAS	GO:0002252	immune effector process	8/3481	18/21670	0.0249264233570734	0.0192881939565677	0.444444444444444	2.76676561652143	AT5G40990/AT2G35930/AT5G47220/AT3G11840/AT3G52450/AT3G15210/AT3G56400/AT1G42540
6 DAS	GO:0009646	response to absence of light	15/3481	46/21670	0.0249264233570734	0.0192881939565677	0.326086956521739	2.02996390342605	AT5G20230/AT2G41100/AT1G67070/AT1G02580/AT5G18170/AT4G02380/AT2G46990/AT1G21400/AT5G08560/AT5G53980/AT5G37770/AT3G06850/AT2G43400/AT1G04400/AT1G64520
6 DAS	GO:0045927	positive regulation of growth	14/3481	42/21670	0.0261511903136433	0.0202359248953994	0.333333333333333	2.07507421239108	AT2G41230/AT2G41225/AT1G30755/AT5G20820/AT2G44080/AT5G63980/AT3G59900/AT5G08660/AT1G67360/AT2G42890/AT1G03060/AT5G56170/AT5G53000/AT5G07290
6 DAS	GO:0043547	positive regulation of GTPase activity	13/3481	40/21670	0.040578056516768	0.0313995077939607	0.325	2.0231973570813	AT1G70810/AT5G37740/AT4G28550/AT5G54780/AT5G47710/AT2G01540/AT3G26090/AT1G70800/AT5G52580/AT4G29950/AT3G07890/AT3G02460/AT3G49350
6 DAS	GO:0010224	response to UV-B	20/3481	73/21670	0.0498140250971054	0.0385463475471963	0.273972602739726	1.70554044854061	AT3G53600/AT1G05880/AT1G35210/AT1G75040/AT5G26920/AT2G22880/AT5G59820/AT1G73805/AT4G36220/AT2G01180/AT1G66580/AT1G32870/AT2G37040/AT3G55270/AT3G45640/AT1G08830/AT5G17780/AT3G17800/AT5G41360/AT5G14170
10 DAS	GO:0009620	response to fungus	169/3789	353/21670	1.1363378246787e-36	8.51195363015599e-37	0.478753541076487	2.73808108607218	AT2G30770/AT3G26830/AT3G55970/AT3G49110/AT5G37840/AT1G79680/AT2G38240/AT3G44860/AT5G66890/AT2G45220/AT3G04220/AT2G34930/AT5G40990/AT1G21250/AT3G45140/AT5G46350/AT1G52400/AT3G25780/AT1G19250/AT1G24140/AT2G14560/AT2G43580/AT3G22600/AT2G38870/AT2G33380/AT3G51450/AT5G43580/AT3G12500/AT4G02330/AT2G43510/AT5G61890/AT1G19670/AT1G05800/AT5G05600/AT2G31865/AT1G15010/AT5G26170/AT1G66700/AT4G14400/AT2G32680…
10 DAS	GO:0071456	cellular response to hypoxia	130/3789	242/21670	1.16065840432833e-34	8.69413153688428e-35	0.537190082644628	3.07229060198181	AT4G37710/AT2G14247/AT4G31970/AT1G57630/AT5G15120/AT5G64905/AT1G19250/AT1G14550/AT2G26560/AT2G32210/AT1G66090/AT1G72920/AT2G47520/AT5G25250/AT1G14540/AT1G76640/AT1G07135/AT4G30280/AT1G02360/AT5G20230/AT1G15010/AT2G23270/AT1G26380/AT3G10040/AT1G68620/AT2G16060/AT5G54490/AT2G22500/AT1G76650/AT2G32200/AT3G25250/AT1G19020/AT3G46080/AT4G26270/AT5G42380/AT1G05880/AT4G16660/AT5G06320/AT5G45340/AT2G46400…
10 DAS	GO:0009611	response to wounding	120/3789	243/21670	6.10020866104836e-28	4.56947679901451e-28	0.493827160493827	2.82428993610484	AT1G30135/AT1G17380/AT1G55020/AT3G44860/AT3G15356/AT1G52030/AT1G61120/AT5G40990/AT5G13220/AT3G45140/AT3G19710/AT5G05730/AT4G11280/AT1G76930/AT1G72520/AT1G06160/AT3G54150/AT2G27690/AT5G43570/AT2G38870/AT1G19180/AT3G51450/AT1G72920/AT5G43580/AT5G14200/AT3G12500/AT2G22330/AT5G07310/AT5G20230/AT1G05800/AT5G24770/AT1G51760/AT2G24850/AT3G53600/AT5G65510/AT1G73260/AT4G34710/AT5G44420/AT2G37040/AT4G22880…
10 DAS	GO:0019748	secondary metabolic process	150/3789	367/21670	5.10964963656422e-24	3.82747980646298e-24	0.408719346049046	2.33754241986879	AT2G30770/AT2G29470/AT5G05340/AT3G26830/AT1G69930/AT4G37990/AT2G29460/AT5G28510/AT4G39950/AT3G60120/AT1G69920/AT1G65860/AT1G64160/AT1G16410/AT3G53160/AT1G52400/AT3G19710/AT1G80820/AT5G23010/AT4G02520/AT5G25980/AT5G24540/AT3G58990/AT1G78370/AT4G39940/AT1G18590/AT2G43100/AT3G03640/AT5G14200/AT1G62560/AT1G16400/AT5G23020/AT2G29440/AT2G22330/AT1G68320/AT1G61820/AT1G04580/AT1G56160/AT4G31940/AT1G02920…
10 DAS	GO:0009753	response to jasmonic acid	96/3789	204/21670	2.42809664142042e-20	1.81881176287975e-20	0.470588235294118	2.69138217440579	AT2G39030/AT1G30135/AT1G15520/AT3G55970/AT1G17380/AT1G55020/AT2G38240/AT3G44860/AT3G15356/AT5G07010/AT1G61120/AT5G13220/AT3G23240/AT3G45140/AT4G11280/AT1G76930/AT1G06160/AT3G27810/AT1G19180/AT3G51450/AT5G14200/AT1G28480/AT5G24770/AT2G24850/AT5G05600/AT3G53600/AT5G26170/AT1G54040/AT3G09940/AT4G34710/AT5G44420/AT4G22880/AT1G20510/AT1G17750/AT1G44350/AT1G43160/AT2G46400/AT1G17420/AT5G47220/AT3G15500…
10 DAS	GO:0046394	carboxylic acid biosynthetic process	164/3789	484/21670	1.42403181417718e-16	1.0666979930524e-16	0.338842975206612	1.93790637971161	AT1G56430/AT1G55020/AT4G39950/AT3G45140/AT3G44720/AT5G05730/AT3G25780/AT1G19250/AT1G72520/AT5G23010/AT1G25220/AT2G26400/AT2G26560/AT3G44300/AT3G54640/AT2G13810/AT3G58990/AT2G33380/AT2G43100/AT4G27070/AT5G14200/AT5G23020/AT2G22330/AT1G22410/AT1G17745/AT5G17990/AT4G35630/AT3G25900/AT1G05800/AT1G73805/AT5G54810/AT4G34200/AT1G01480/AT2G04400/AT5G52810/AT2G37040/AT1G06080/AT1G20510/AT4G39030/AT1G75000…
10 DAS	GO:0002682	regulation of immune system process	93/3789	219/21670	4.11426838442818e-16	3.08187063298464e-16	0.424657534246575	2.42869590053399	AT3G26830/AT3G55970/AT2G29460/AT3G49110/AT2G38240/AT5G40990/AT5G13220/AT3G53160/AT1G19250/AT5G05300/AT1G17600/AT3G22600/AT2G22330/AT1G56160/AT4G01895/AT5G05600/AT1G73805/AT4G14400/AT2G32680/AT5G39670/AT5G52810/AT3G49120/AT1G07260/AT1G44350/AT3G22231/AT4G39830/AT5G65600/AT5G47220/AT5G13320/AT3G25882/AT3G56400/AT3G52400/AT1G07000/AT4G36280/AT5G24090/AT3G59700/AT3G62600/AT5G13190/AT2G25110/AT3G05360…
10 DAS	GO:0008219	cell death	83/3789	199/21670	6.16069359192168e-14	4.6147841817079e-14	0.417085427135678	2.38538960306945	AT4G37990/AT1G16420/AT1G19250/AT2G26560/AT3G50930/AT4G23280/AT4G14400/AT1G73260/AT3G45860/AT3G25250/AT3G27060/AT4G25110/AT4G16660/AT5G65600/AT5G47910/AT5G13320/AT1G17615/AT3G52400/AT4G34180/AT1G08860/AT5G64530/AT4G36280/AT5G13190/AT2G31880/AT3G52430/AT5G47120/AT4G23210/AT5G10380/AT1G21750/AT3G50260/AT5G46180/AT3G11820/AT4G23170/AT3G44880/AT1G02170/AT5G39610/AT4G12720/AT1G72940/AT2G13790/AT1G64460…
10 DAS	GO:0044282	small molecule catabolic process	91/3789	246/21670	1.09667954789552e-11	8.21488579900658e-12	0.369918699186992	2.1156342600639	AT4G39950/AT2G02010/AT2G30660/AT1G44542/AT3G55840/AT2G22330/AT4G34710/AT2G37040/AT4G19230/AT5G45340/AT3G21780/AT5G24760/AT5G17380/AT1G05620/AT4G34180/AT5G09290/AT3G53260/AT1G77120/AT1G30040/AT5G38710/AT5G63980/AT2G02390/AT5G07440/AT2G19570/AT5G65640/AT3G02360/AT5G46180/AT1G02400/AT5G54390/AT4G33150/AT4G16760/AT5G27520/AT3G17770/AT3G10340/AT3G58750/AT4G14430/AT1G76150/AT5G63990/AT5G28050/AT2G16500…
10 DAS	GO:0048193	Golgi vesicle transport	68/3789	182/21670	4.49185806112393e-09	3.36471132960306e-09	0.373626373626374	2.13683914396503	AT1G18830/AT5G39630/AT1G09180/AT3G10780/AT3G15980/AT1G14010/AT5G64990/AT1G47560/AT3G44340/AT5G16830/AT4G20110/AT2G36300/AT2G35190/AT1G21900/AT1G26690/AT1G30900/AT3G07680/AT1G29330/AT3G52850/AT1G11890/AT4G39890/AT5G52210/AT1G30630/AT1G67930/AT4G04910/AT1G56330/AT1G21170/AT3G17780/AT2G30050/AT1G59820/AT1G10290/AT3G22845/AT3G24350/AT1G31780/AT2G01470/AT1G11905/AT4G02350/AT4G30240/AT1G48440/AT2G34840…
10 DAS	GO:0007568	aging	66/3789	177/21670	8.80962454150431e-09	6.59901606439716e-09	0.372881355932203	2.13257824836391	AT3G49620/AT2G35980/AT2G29350/AT3G21520/AT5G39520/AT3G25010/AT2G13810/AT1G17020/AT4G18980/AT1G54040/AT5G59220/AT4G02380/AT3G11340/AT1G64360/AT2G43570/AT1G05100/AT3G56240/AT3G60140/AT4G18425/AT1G73500/AT3G56400/AT1G69490/AT1G05620/AT3G10985/AT2G43000/AT1G70170/AT3G52430/AT5G24110/AT5G08790/AT5G39610/AT2G02990/AT1G34180/AT5G17860/AT5G51640/AT2G13790/AT5G11520/AT4G05320/AT4G18170/AT1G20780/AT4G24310…
10 DAS	GO:0051702	biological process involved in interaction with symbiont	32/3789	67/21670	2.81530957011201e-07	2.10886093861247e-07	0.477611940298507	2.73155205760587	AT4G37990/AT1G19250/AT2G26560/AT3G50930/AT5G13320/AT3G52400/AT5G03160/AT4G36280/AT5G13190/AT4G23210/AT5G46180/AT3G11820/AT4G12720/AT1G64460/AT5G61900/AT1G29690/AT4G26090/AT1G71220/AT1G08450/AT1G28380/AT4G25230/AT4G17720/AT1G59870/AT5G20480/AT5G22290/AT4G22305/AT4G38360/AT3G25070/AT4G31300/AT3G20600/AT5G45250/AT1G26630
10 DAS	GO:0010256	endomembrane system organization	45/3789	119/21670	2.08982253712682e-06	1.56542114017089e-06	0.378151260504202	2.16271781871894	AT1G18830/AT3G21520/AT3G10780/AT2G23830/AT4G18425/AT1G14010/AT3G02360/AT3G19260/AT2G36300/AT1G21900/AT1G26690/AT4G24310/AT1G04200/AT3G07680/AT5G54110/AT1G11890/AT4G04910/AT1G54030/AT3G05710/AT3G22845/AT1G31780/AT4G14950/AT2G20370/AT1G13580/AT4G29160/AT4G02030/AT5G51430/AT1G15130/AT4G34660/AT1G48760/AT3G63460/AT5G07960/AT3G13530/AT3G07980/AT1G78900/AT2G19950/AT3G27530/AT3G13870/AT1G18190/AT5G22950…
10 DAS	GO:0046777	protein autophosphorylation	61/3789	189/21670	8.88539616301286e-06	6.65577423214933e-06	0.322751322751323	1.84587520823995	AT3G09010/AT1G05100/AT4G23250/AT1G73500/AT1G65790/AT5G60280/AT4G26890/AT5G24430/AT3G04690/AT3G59700/AT1G76040/AT4G21940/AT4G28490/AT1G56120/AT3G10660/AT5G25440/AT1G16670/AT1G18890/AT1G56145/AT3G21630/AT1G11050/AT1G68330/AT3G49370/AT2G46500/AT3G06030/AT2G30040/AT4G04710/AT5G10720/AT5G03730/AT4G04700/AT5G58350/AT1G29750/AT1G56140/AT1G09970/AT5G41990/AT5G04870/AT3G53930/AT1G53430/AT1G20930/AT1G56130…
10 DAS	GO:0052542	defense response by callose deposition	17/3789	29/21670	1.28550707121133e-05	9.62933411503953e-06	0.586206896551724	3.35262693277273	AT4G39950/AT3G54640/AT2G22330/AT1G24100/AT1G18570/AT4G31500/AT4G23100/AT1G51800/AT5G61010/AT1G28380/AT1G59870/AT4G03550/AT3G29400/AT5G44070/AT5G58430/AT1G64060/AT5G66850
10 DAS	GO:0036503	ERAD pathway	28/3789	66/21670	2.89147114305178e-05	2.16591120686754e-05	0.424242424242424	2.42632180874461	AT1G09080/AT5G42020/AT1G56340/AT5G28540/AT1G09210/AT5G61790/AT5G35080/AT1G65040/AT1G71220/AT1G08450/AT1G18260/AT1G16900/AT5G47420/AT2G29070/AT4G29960/AT4G17420/AT2G44410/AT4G27470/AT1G50670/AT3G58460/AT5G50430/AT5G07340/AT3G09840/AT2G21270/AT5G15400/AT4G24330/AT4G08320/AT5G01960
10 DAS	GO:0072665	protein localization to vacuole	25/3789	56/21670	3.18354337529733e-05	2.38469344253177e-05	0.446428571428571	2.55320853598763	AT5G16830/AT4G20110/AT1G76970/AT1G30900/AT4G23700/AT3G52850/AT3G53120/AT1G09070/AT3G54300/AT5G04920/AT2G36680/AT3G47810/AT3G53720/AT4G24690/AT1G15130/AT1G21380/AT1G48760/AT2G14720/AT3G61710/AT5G06140/AT4G21560/AT1G56590/AT1G48090/AT2G38410/AT5G39510
10 DAS	GO:0072666	establishment of protein localization to vacuole	25/3789	56/21670	3.18354337529733e-05	2.38469344253177e-05	0.446428571428571	2.55320853598763	AT5G16830/AT4G20110/AT1G76970/AT1G30900/AT4G23700/AT3G52850/AT3G53120/AT1G09070/AT3G54300/AT5G04920/AT2G36680/AT3G47810/AT3G53720/AT4G24690/AT1G15130/AT1G21380/AT1G48760/AT2G14720/AT3G61710/AT5G06140/AT4G21560/AT1G56590/AT1G48090/AT2G38410/AT5G39510
10 DAS	GO:0046149	pigment catabolic process	11/3789	22/21670	0.0038445840886007	0.00287985850498795	0.5	2.85959356030615	AT1G19670/AT4G11910/AT3G44880/AT3G03470/AT4G22920/AT1G20780/AT5G13800/AT3G03890/AT4G01660/AT3G04060/AT5G43430
10 DAS	GO:0051668	localization within membrane	47/3789	169/21670	0.00429821995600202	0.00321966304061426	0.27810650887574	1.59054316372058	AT5G25250/AT3G60540/AT4G02650/AT1G29310/AT5G25260/AT3G52400/AT5G64870/AT3G11820/AT1G47560/AT2G33120/AT4G01730/AT4G24920/AT3G27070/AT2G45070/AT3G53120/AT5G52210/AT4G04910/AT1G21170/AT1G59820/AT1G14670/AT3G22950/AT3G60800/AT5G10840/AT2G34250/AT2G36680/AT4G02350/AT1G15310/AT1G77220/AT4G02030/AT1G71270/AT4G38360/AT1G15130/AT3G48760/AT2G14255/AT3G03490/AT3G60860/AT3G48570/AT5G07960/AT4G12650/AT2G24170…
10 DAS	GO:0015748	organophosphate ester transport	17/3789	46/21670	0.00893328509254912	0.00669164634154829	0.369565217391304	2.11361263153063	AT1G61800/AT5G13490/AT3G25610/AT1G13210/AT5G04930/AT5G27520/AT3G12740/AT1G17500/AT3G08580/AT5G44240/AT2G38530/AT5G33320/AT1G59820/AT2G39970/AT1G26130/AT2G47490/AT5G54800
10 DAS	GO:0046618	xenobiotic export	18/3789	50/21670	0.00916845684892603	0.00686780619840851	0.36	2.05890736342043	AT3G23550/AT1G71140/AT4G23030/AT2G04070/AT2G34360/AT5G52050/AT1G66780/AT2G04080/AT2G04100/AT1G33090/AT2G04040/AT3G26590/AT2G04050/AT1G33110/AT1G61890/AT1G15170/AT4G21903/AT3G23560
10 DAS	GO:0002252	immune effector process	9/3789	18/21670	0.010729226845696	0.00803693051613514	0.5	2.85959356030615	AT5G40990/AT1G56160/AT5G47220/AT3G56400/AT3G52450/AT2G35930/AT3G11840/AT3G15210/AT1G64060
10 DAS	GO:0009411	response to UV	36/3789	127/21670	0.010779290178811	0.00807443140370496	0.283464566929134	1.62118690033105	AT1G16420/AT1G75040/AT3G50930/AT1G35210/AT4G13770/AT3G53600/AT1G73805/AT2G37040/AT1G05880/AT3G22231/AT4G36220/AT3G21240/AT2G22880/AT1G51680/AT3G52430/AT3G07800/AT5G59820/AT1G66580/AT1G79180/AT5G08020/AT1G65060/AT2G01180/AT1G08830/AT5G13930/AT5G18070/AT5G21900/AT3G45640/AT1G10670/AT3G55270/AT3G12610/AT4G01660/AT1G47870/AT3G04880/AT3G61800/AT2G36910/AT1G14320
10 DAS	GO:0009875	pollen-pistil interaction	23/3789	71/21670	0.0109210087664975	0.00818058839511371	0.323943661971831	1.85269441935328	AT1G61610/AT1G61440/AT4G21380/AT4G21390/AT1G73500/AT1G65790/AT5G24080/AT4G26070/AT1G61370/AT1G11330/AT1G47560/AT1G61550/AT1G61360/AT1G61400/AT1G51660/AT1G21170/AT4G29810/AT1G61420/AT3G45640/AT4G02350/AT1G34300/AT3G22200/AT1G71820
10 DAS	GO:0000727	double-strand break repair via break-induced replication	7/3789	12/21670	0.0112179031011136	0.0084029827178604	0.583333333333333	3.33619248702384	AT1G44900/AT5G44635/AT3G25100/AT4G02060/AT5G46280/AT2G16440/AT2G07690
10 DAS	GO:0016049	cell growth	111/3789	494/21670	0.0152335468768387	0.0114109767203359	0.224696356275304	1.28508050685823	AT3G49110/AT1G56430/AT5G28646/AT4G01630/AT1G09080/AT5G20820/AT2G41230/AT3G45960/AT1G65240/AT1G05800/AT1G21270/AT1G74360/AT4G02650/AT3G49120/AT3G15370/AT2G33160/AT5G55020/AT1G69490/AT2G20610/AT5G49680/AT1G70140/AT1G26770/AT3G04690/AT3G08970/AT5G63980/AT3G45970/AT1G64980/AT3G59760/AT5G28490/AT3G20470/AT2G36880/AT5G16910/AT4G13880/AT4G14430/AT1G12560/AT3G06810/AT1G10550/AT5G05500/AT1G17060/AT1G17500…
10 DAS	GO:0006875	cellular metal ion homeostasis	37/3789	135/21670	0.0163302160370377	0.0122324575191358	0.274074074074074	1.56748091453819	AT2G41240/AT3G56970/AT3G46900/AT3G56980/AT4G19690/AT2G29110/AT5G04150/AT1G01580/AT4G16370/AT5G48410/AT3G56240/AT5G11210/AT3G18290/AT2G29100/AT1G29060/AT5G48400/AT4G36820/AT1G09575/AT3G47640/AT5G67330/AT2G23150/AT4G27860/AT1G07670/AT5G66650/AT3G51860/AT5G24290/AT2G32400/AT4G30996/AT1G04120/AT1G18910/AT3G08040/AT3G53720/AT4G08230/AT4G39080/AT1G07810/AT1G65540/AT4G24330
10 DAS	GO:0008361	regulation of cell size	11/3789	26/21670	0.0163302160370377	0.0122324575191358	0.423076923076923	2.41965608948982	AT1G21270/AT2G17040/AT1G68765/AT5G08790/AT5G61900/AT2G45680/AT1G30450/AT1G10670/AT5G42350/AT3G13530/AT2G36910
10 DAS	GO:0043087	regulation of GTPase activity	15/3789	42/21670	0.0208424032322973	0.0156123967715754	0.357142857142857	2.04256682879011	AT4G28550/AT1G70810/AT3G59570/AT2G43490/AT5G37740/AT5G54780/AT5G15930/AT3G14910/AT3G26090/AT2G01540/AT5G52580/AT3G07890/AT5G54310/AT3G49350/AT3G02460
10 DAS	GO:0008272	sulfate transport	6/3789	11/21670	0.0313538349628189	0.0234861837329526	0.545454545454545	3.11955661124307	AT5G19600/AT2G22500/AT5G09470/AT4G24570/AT3G51895/AT5G10180
10 DAS	GO:0048317	seed morphogenesis	6/3789	11/21670	0.0313538349628189	0.0234861837329526	0.545454545454545	3.11955661124307	AT1G02580/AT5G54650/AT5G42890/AT1G52880/AT1G19270/AT3G15510
10 DAS	GO:0000422	autophagy of mitochondrion	8/3789	18/21670	0.03693059249099	0.0276635595498526	0.444444444444444	2.54186094249436	AT3G56440/AT2G31260/AT3G62770/AT3G57090/AT4G30790/AT3G61960/AT5G45900/AT2G40810
10 DAS	GO:0061726	mitochondrion disassembly	8/3789	18/21670	0.03693059249099	0.0276635595498526	0.444444444444444	2.54186094249436	AT3G56440/AT2G31260/AT3G62770/AT3G57090/AT4G30790/AT3G61960/AT5G45900/AT2G40810
10 DAS	GO:0019725	cellular homeostasis	60/3789	254/21670	0.0384668435434521	0.0288143174881034	0.236220472440945	1.3509890836092	AT2G41240/AT3G56970/AT3G46900/AT3G56980/AT4G19690/AT2G29110/AT5G04150/AT1G01580/AT1G21270/AT4G16370/AT5G48410/AT3G56240/AT3G61190/AT5G11210/AT3G18290/AT1G60740/AT1G08860/AT2G29100/AT1G29060/AT5G48400/AT4G36820/AT1G09575/AT3G24170/AT3G20040/AT3G47640/AT1G65970/AT3G17240/AT5G67330/AT5G61900/AT2G23150/AT2G17420/AT4G27860/AT1G07670/AT5G66650/AT3G51860/AT3G17790/AT5G24290/AT1G79610/AT2G32400/AT1G30450…

## Sheet: Downregulated
Genes downregulated
Cluster	GO ID	GO term	GeneRatio	BgRatio	p-adjust	qvalue	richFactor	FoldEnrichment	geneID
3 DAS	GO:0032787	monocarboxylic acid metabolic process	95/1510	487/21670	4.66399544215029e-17	3.36784822163916e-17	0.195071868583162	2.79947509417028	AT1G06090/AT1G06120/AT3G06460/AT3G45140/AT5G24530/AT5G63450/AT3G14440/AT5G38020/AT5G23190/AT3G53480/AT4G34510/AT5G58860/AT1G05560/AT2G33230/AT3G22200/AT1G76690/AT3G01420/AT2G26640/AT3G44300/AT1G78050/AT1G26360/AT3G16950/AT4G26530/AT5G07010/AT5G48230/AT2G43840/AT2G43820/AT1G18870/AT5G16230/AT1G19440/AT1G69240/AT3G04120/AT3G52930/AT1G07720/AT1G01120/AT1G22170/AT4G24620/AT3G15690/AT1G74030/AT5G56350…
3 DAS	GO:0006091	generation of precursor metabolites and energy	76/1510	357/21670	8.45125655122183e-16	6.10261088366895e-16	0.212885154061625	3.05511343610292	AT3G14940/AT5G24410/AT1G78050/AT4G26530/AT5G51060/AT4G05020/AT1G24280/AT3G50820/AT2G44350/AT3G60750/AT1G15980/AT1G50250/AT3G04120/AT2G17130/AT3G52930/AT1G22170/AT4G24620/AT1G53310/AT1G74030/AT5G54270/AT2G27510/AT5G56350/AT5G66570/AT5G56630/AT4G26970/AT2G21330/AT2G22480/AT1G56190/AT5G52920/AT4G04640/AT3G12780/AT1G16720/AT3G54050/AT5G41670/AT1G55670/AT5G37510/AT3G04790/AT3G01440/AT2G36530/AT1G06680…
3 DAS	GO:0019748	secondary metabolic process	77/1510	367/21670	8.45125655122183e-16	6.10261088366895e-16	0.209809264305177	3.01097136257827	AT1G47600/AT5G48850/AT2G44460/AT4G33790/AT2G28670/AT5G03260/AT5G66390/AT1G53680/AT5G36180/AT3G16390/AT5G13580/AT3G16410/AT3G56400/AT5G23190/AT3G53480/AT1G32100/AT1G27140/AT2G29490/AT5G58860/AT4G01070/AT5G60020/AT3G12240/AT2G32860/AT3G44320/AT3G11430/AT1G78340/AT1G12140/AT2G25450/AT3G12230/AT1G62570/AT4G37410/AT2G44450/AT5G41040/AT1G33800/AT1G78380/AT5G04330/AT2G44130/AT3G21240/AT3G44550/AT4G37400…
3 DAS	GO:0042546	cell wall biogenesis	63/1510	276/21670	1.18251875250613e-14	8.53890988333946e-15	0.228260869565217	3.27577022746905	AT4G15290/AT2G18800/AT2G32620/AT5G49270/AT2G15370/AT1G65310/AT1G63450/AT4G24010/AT1G08990/AT4G09990/AT4G17220/AT4G10350/AT5G67210/AT5G57530/AT2G28110/AT4G30270/AT1G56550/AT2G32530/AT4G25810/AT5G41040/AT1G33800/AT1G54940/AT5G57560/AT1G03870/AT2G06850/AT5G44130/AT1G32170/AT3G55990/AT4G30280/AT5G54690/AT2G32540/AT1G79620/AT5G65730/AT2G20520/AT1G67070/AT4G37800/AT1G67330/AT1G02730/AT1G10550/AT4G14940…
3 DAS	GO:0055086	nucleobase-containing small molecule metabolic process	74/1510	364/21670	1.50836521571694e-14	1.08918312042616e-14	0.203296703296703	2.91750964267521	AT3G11340/AT4G33790/AT1G14240/AT4G20460/AT1G78050/AT2G36310/AT4G28940/AT3G16950/AT4G26530/AT3G44550/AT5G18860/AT1G67070/AT5G66280/AT3G62830/AT3G51160/AT4G11820/AT2G19570/AT3G04120/AT5G39320/AT3G52930/AT1G22170/AT4G24620/AT1G76490/AT1G74030/AT5G52560/AT2G01830/AT5G56350/AT5G56630/AT2G21330/AT2G22480/AT1G56190/AT5G52920/AT2G38040/AT4G34890/AT4G04640/AT3G29360/AT3G12780/AT3G25860/AT3G17810/AT5G15490…
3 DAS	GO:0009414	response to water deprivation	77/1510	406/21670	1.01636853599819e-13	7.33914732325162e-14	0.189655172413793	2.72174012331583	AT5G10230/AT1G62660/AT3G45140/AT3G50970/AT3G49190/AT1G73330/AT2G40750/AT1G20440/AT5G40010/AT4G23400/AT3G14440/AT2G46680/AT2G37770/AT3G24500/AT3G56400/AT2G37180/AT1G12110/AT1G35720/AT2G15970/AT2G37170/AT2G38750/AT1G20450/AT2G33230/AT1G05260/AT3G61430/AT1G79410/AT4G23450/AT1G78380/AT1G76180/AT5G65730/AT1G01620/AT1G69310/AT5G38710/AT1G02730/AT2G38760/AT1G47128/AT3G20250/AT3G53420/AT2G47800/AT5G40390…
3 DAS	GO:0016049	cell growth	83/1510	494/21670	5.7260815259099e-12	4.1347753708579e-12	0.168016194331984	2.41119929216827	AT5G04950/AT4G15290/AT5G60660/AT5G56080/AT5G49270/AT1G63450/AT2G37540/AT1G75750/AT3G23090/AT2G45890/AT4G31910/AT5G54790/AT5G56540/AT1G79250/AT5G36260/AT4G34580/AT3G45970/AT3G23630/AT1G72150/AT3G26610/AT3G22200/AT5G62310/AT2G41970/AT5G54510/AT1G50890/AT3G55500/AT2G06850/AT5G54380/AT1G62980/AT3G54870/AT1G79620/AT1G12950/AT1G60420/AT5G20490/AT1G17060/AT1G56430/AT1G11160/AT5G48230/AT1G72700/AT2G19760…
3 DAS	GO:0009409	response to cold	67/1510	398/21670	8.64508563424905e-10	6.2425739133657e-10	0.168341708542714	2.41587074445073	AT5G10230/AT3G50970/AT2G23410/AT5G58784/AT1G20440/AT5G40010/AT2G37770/AT3G05890/AT1G35720/AT2G15970/AT2G38750/AT1G20450/AT1G05260/AT1G79410/AT2G26640/AT5G57560/AT3G05880/AT3G55990/AT3G01500/AT4G35985/AT1G76180/AT2G38170/AT2G38760/AT1G18740/AT5G54770/AT1G63940/AT4G17090/AT1G17190/AT5G67450/AT1G07720/AT1G01120/AT1G77490/AT1G66280/AT5G37770/AT1G68530/AT5G16910/AT5G01820/AT1G09340/AT2G17840/AT2G39730…
3 DAS	GO:0010118	stomatal movement	37/1510	160/21670	3.39294761382718e-09	2.45003082208726e-09	0.23125	3.31866721854305	AT2G40750/AT2G39050/AT3G56400/AT1G09540/AT1G51850/AT3G01500/AT3G45780/AT5G27150/AT4G17970/AT1G47128/AT2G47800/AT5G54270/AT5G25980/AT3G14270/AT1G32080/AT1G70410/AT3G11130/AT3G49220/AT1G23030/AT3G51550/AT4G35790/AT5G23060/AT5G44790/AT5G03280/AT5G46860/AT5G23720/AT2G05070/AT2G05100/AT5G56030/AT2G17290/AT5G58140/AT1G04120/AT1G04400/AT4G03560/AT4G08920/AT3G08590/AT5G06970
3 DAS	GO:0015698	inorganic anion transport	27/1510	110/21670	1.86937815989998e-07	1.34986879585964e-07	0.245454545454545	3.52251655629139	AT5G10180/AT1G08090/AT3G45710/AT5G03545/AT5G60770/AT1G72140/AT4G08620/AT1G78000/AT3G45700/AT1G12110/AT1G18880/AT3G45680/AT1G72180/AT1G68740/AT3G23430/AT3G16180/AT5G40890/AT1G52190/AT1G80310/AT5G62720/AT5G49660/AT2G01830/AT2G22500/AT2G33770/AT1G30400/AT1G63010/AT1G22550
3 DAS	GO:0009991	response to extracellular stimulus	45/1510	275/21670	1.62213516755944e-06	1.17133584436024e-06	0.163636363636364	2.34834437086093	AT3G49580/AT3G08860/AT2G02990/AT5G24660/AT5G48850/AT5G03545/AT1G78000/AT3G47340/AT3G03520/AT1G22500/AT3G56970/AT3G53480/AT2G15970/AT1G72180/AT1G68740/AT3G44320/AT1G79410/AT3G62680/AT2G29630/AT1G78380/AT3G23430/AT5G01220/AT1G67070/AT5G49660/AT3G05630/AT1G53310/AT2G26890/AT2G01830/AT1G16370/AT3G48350/AT4G26970/AT1G09340/AT4G21980/AT1G32080/AT2G33770/AT3G62770/AT3G17810/AT4G39080/AT5G45900/AT1G27320…
3 DAS	GO:0048878	chemical homeostasis	59/1510	434/21670	1.11396013071298e-05	8.04385143967672e-06	0.135944700460829	1.95094149601733	AT4G27850/AT5G47950/AT5G52790/AT3G25190/AT5G61350/AT1G44800/AT3G60330/AT1G74770/AT3G56970/AT5G38030/AT3G53480/AT4G15310/AT4G15400/AT4G00900/AT5G01490/AT5G54510/AT4G15300/AT1G36370/AT3G62270/AT5G27150/AT2G38170/AT4G30190/AT2G17500/AT4G16370/AT5G16230/AT5G48930/AT2G19110/AT1G68670/AT3G26520/AT2G01420/AT3G56240/AT1G28130/AT2G01830/AT1G78490/AT2G33770/AT5G57620/AT4G39080/AT3G13320/AT1G20340/AT1G75220…
3 DAS	GO:0006979	response to oxidative stress	59/1510	451/21670	3.36188176263265e-05	2.42759832338589e-05	0.130820399113082	1.87740268131158	AT5G15180/AT2G39040/AT4G04830/AT3G01190/AT2G40750/AT5G17820/AT2G18980/AT5G66390/AT1G75280/AT4G30170/AT5G42180/AT3G56400/AT5G19790/AT1G30870/AT3G49960/AT1G35720/AT5G38000/AT1G31770/AT1G05260/AT1G75270/AT3G01420/AT5G22410/AT2G37130/AT5G19875/AT1G78380/AT2G29500/AT1G34510/AT1G03850/AT5G61640/AT1G44970/AT3G32980/AT5G51890/AT5G40390/AT3G04120/AT3G56240/AT1G77490/AT1G52760/AT5G37770/AT4G26970/AT1G18150…
3 DAS	GO:0009645	response to low light intensity stimulus	9/1510	20/21670	4.50078982648129e-05	3.24999824744645e-05	0.45	6.45794701986755	AT3G59220/AT2G06850/AT2G27820/AT2G05070/AT2G05100/AT3G54890/AT1G61520/AT1G04400/AT4G08920
3 DAS	GO:0044282	small molecule catabolic process	37/1510	246/21670	0.000103386198337514	7.46546664832287e-05	0.150406504065041	2.15848274376784	AT4G13890/AT5G24530/AT3G47340/AT3G01260/AT3G22200/AT3G01420/AT1G22440/AT5G17330/AT2G36310/AT4G33010/AT1G36370/AT5G18860/AT5G62530/AT5G38710/AT5G48230/AT2G19570/AT5G36160/AT1G65960/AT2G37040/AT5G41670/AT5G42250/AT4G29120/AT4G29010/AT5G43280/AT1G65580/AT1G70580/AT1G80360/AT5G43940/AT3G55440/AT1G79440/AT3G48990/AT1G12050/AT1G64190/AT4G34030/AT3G08590/AT5G28050/AT1G11860
3 DAS	GO:0014070	response to organic cyclic compound	44/1510	315/21670	0.000104449570793918	7.54225225158219e-05	0.13968253968254	2.0045832019342	AT2G01520/AT5G22570/AT4G14390/AT3G11340/AT2G40750/AT5G24530/AT1G75750/AT1G22500/AT3G56400/AT4G31910/AT3G53480/AT1G05560/AT5G01900/AT4G15400/AT4G30270/AT1G75270/AT3G01420/AT1G28480/AT1G76680/AT2G29630/AT5G57560/AT5G54380/AT1G67070/AT5G51060/AT3G46290/AT3G61260/AT2G01950/AT2G29420/AT2G32690/AT4G04695/AT5G65430/AT5G60600/AT3G51550/AT5G43470/AT1G15780/AT2G32800/AT5G03280/AT1G50030/AT5G57710/AT1G63500…
3 DAS	GO:0003013	circulatory system process	9/1510	22/21670	0.000104449570793918	7.54225225158219e-05	0.409090909090909	5.87086092715232	AT5G04950/AT5G56080/AT1G18880/AT1G35720/AT1G56430/AT4G16370/AT2G01950/AT5G65020/AT3G47960
3 DAS	GO:0003018	vascular process in circulatory system	9/1510	22/21670	0.000104449570793918	7.54225225158219e-05	0.409090909090909	5.87086092715232	AT5G04950/AT5G56080/AT1G18880/AT1G35720/AT1G56430/AT4G16370/AT2G01950/AT5G65020/AT3G47960
3 DAS	GO:0010232	vascular transport	9/1510	22/21670	0.000104449570793918	7.54225225158219e-05	0.409090909090909	5.87086092715232	AT5G04950/AT5G56080/AT1G18880/AT1G35720/AT1G56430/AT4G16370/AT2G01950/AT5G65020/AT3G47960
3 DAS	GO:0010233	phloem transport	9/1510	22/21670	0.000104449570793918	7.54225225158219e-05	0.409090909090909	5.87086092715232	AT5G04950/AT5G56080/AT1G18880/AT1G35720/AT1G56430/AT4G16370/AT2G01950/AT5G65020/AT3G47960
3 DAS	GO:0017014	protein nitrosylation	7/1510	16/21670	0.000534824775898494	0.000386194346186556	0.4375	6.27855960264901	AT1G09340/AT3G12780/AT4G20360/AT5G20630/AT3G55440/AT3G26650/AT1G32060
3 DAS	GO:0018119	peptidyl-cysteine S-nitrosylation	7/1510	16/21670	0.000534824775898494	0.000386194346186556	0.4375	6.27855960264901	AT1G09340/AT3G12780/AT4G20360/AT5G20630/AT3G55440/AT3G26650/AT1G32060
3 DAS	GO:0090558	plant epidermis development	39/1510	289/21670	0.00057707487428858	0.000416702934904543	0.134948096885813	1.9366392447123	AT4G15290/AT5G60660/AT1G20160/AT5G49270/AT1G63450/AT5G61350/AT5G58010/AT2G45890/AT5G56540/AT4G34580/AT1G67030/AT2G41970/AT3G62680/AT5G40330/AT1G16440/AT3G54870/AT3G01500/AT1G12950/AT5G51060/AT5G20490/AT4G26690/AT1G27740/AT4G18640/AT1G74030/AT5G16910/AT3G51460/AT1G77450/AT1G70410/AT5G49680/AT2G47000/AT4G38600/AT3G43960/AT1G19835/AT5G03280/AT4G20140/AT1G04160/AT3G18780/AT3G55360/AT5G09810
3 DAS	GO:0019740	nitrogen utilization	5/1510	11/21670	0.00415490247971986	0.00300023469168685	0.454545454545455	6.52317880794702	AT5G53460/AT5G04140/AT5G35630/AT2G41220/AT5G12860
3 DAS	GO:0035556	intracellular signal transduction	53/1510	499/21670	0.0101328654866459	0.00731689244395481	0.106212424849699	1.52425380562449	AT4G04710/AT2G40750/AT3G24500/AT3G56400/AT5G54020/AT2G21840/AT1G44050/AT3G12500/AT1G49160/AT5G62920/AT5G62310/AT5G54030/AT4G01350/AT4G40010/AT5G59940/AT3G23430/AT3G45530/AT4G10370/AT1G59940/AT2G17890/AT1G08650/AT3G05630/AT2G01830/AT1G18150/AT3G08510/AT1G74740/AT4G04695/AT3G21510/AT1G49340/AT5G59920/AT4G16340/AT1G27320/AT1G60940/AT5G44790/AT5G03280/AT4G24580/AT3G50530/AT1G50030/AT5G09890/AT2G41140…
3 DAS	GO:0019750	chloroplast localization	8/1510	35/21670	0.0152272819486671	0.0109955455718826	0.228571428571429	3.2802270577105	AT1G12150/AT3G45780/AT2G26570/AT5G55860/AT4G28080/AT3G25690/AT2G30520/AT5G58140
3 DAS	GO:0051644	plastid localization	8/1510	35/21670	0.0152272819486671	0.0109955455718826	0.228571428571429	3.2802270577105	AT1G12150/AT3G45780/AT2G26570/AT5G55860/AT4G28080/AT3G25690/AT2G30520/AT5G58140
3 DAS	GO:0015976	carbon utilization	4/1510	10/21670	0.0214921683180906	0.0155193892762211	0.4	5.74039735099338	AT3G01500/AT4G33580/AT5G14740/AT1G70410
3 DAS	GO:0010315	auxin efflux	5/1510	16/21670	0.0225946900891054	0.0163155148367809	0.3125	4.48468543046358	AT2G01420/AT2G47000/AT1G23080/AT1G75500/AT1G53500
3 DAS	GO:0009615	response to virus	14/1510	94/21670	0.0299338625891473	0.0216150952843067	0.148936170212766	2.13738199239115	AT3G60240/AT3G20250/AT3G61260/AT1G31280/AT1G56190/AT3G12580/AT5G43470/AT5G02490/AT5G14930/AT1G50030/AT2G20990/AT3G09440/AT1G04400/AT4G13350
3 DAS	GO:0071214	cellular response to abiotic stimulus	24/1510	198/21670	0.030995991253284	0.0223820531806068	0.121212121212121	1.73951434878587	AT3G45680/AT2G15970/AT3G59220/AT1G79410/AT1G78380/AT3G45780/AT1G59940/AT2G01830/AT1G16370/AT1G66280/AT1G09340/AT2G42690/AT1G32080/AT5G55860/AT5G20730/AT4G04340/AT5G19770/AT1G09570/AT1G08540/AT2G34620/AT1G53210/AT2G46340/AT1G04400/AT4G08920
3 DAS	GO:0104004	cellular response to environmental stimulus	24/1510	198/21670	0.030995991253284	0.0223820531806068	0.121212121212121	1.73951434878587	AT3G45680/AT2G15970/AT3G59220/AT1G79410/AT1G78380/AT3G45780/AT1G59940/AT2G01830/AT1G16370/AT1G66280/AT1G09340/AT2G42690/AT1G32080/AT5G55860/AT5G20730/AT4G04340/AT5G19770/AT1G09570/AT1G08540/AT2G34620/AT1G53210/AT2G46340/AT1G04400/AT4G08920
3 DAS	GO:0050688	regulation of defense response to virus	4/1510	12/21670	0.038121365615085	0.0275272510416581	0.333333333333333	4.78366445916115	AT1G56190/AT5G43470/AT5G14930/AT1G50030
3 DAS	GO:0010025	wax biosynthetic process	7/1510	35/21670	0.0459818057752838	0.0332032363086209	0.2	2.87019867549669	AT4G33790/AT1G01120/AT1G68530/AT4G24510/AT5G57800/AT4G34100/AT3G55360
6 DAS	GO:0015979	photosynthesis	146/2670	198/21670	3.51793438166624e-86	3.05051652675954e-86	0.737373737373737	5.9846025801082	AT4G20190/AT3G27690/AT2G34430/AT3G14395/AT3G01440/AT2G01590/AT3G01500/AT2G39470/AT5G38410/AT1G14150/AT1G29920/AT1G30850/AT5G50950/AT3G16250/AT3G54890/AT2G05100/AT1G08380/AT5G54270/AT3G62410/AT1G70760/AT1G67090/AT5G52100/AT1G60950/AT5G64040/AT1G75690/AT3G55330/AT2G46820/AT1G55370/AT2G01918/AT1G19150/AT2G30570/AT1G54500/AT2G05070/AT3G61470/AT2G28605/AT1G29910/AT4G10340/AT1G61520/AT1G79040/AT5G02120…
6 DAS	GO:0009657	plastid organization	120/2670	318/21670	9.8211806882962e-29	8.51626856887223e-29	0.377358490566038	3.062681082609	AT5G58780/AT4G26150/AT1G12150/AT2G46820/AT3G56290/AT1G74730/AT5G08050/AT2G41660/AT3G27750/AT3G63140/AT3G56910/AT2G38140/AT1G09340/AT2G30170/AT1G21150/AT5G24660/AT2G34860/AT2G40480/AT1G62120/AT3G18870/AT5G22640/AT3G12780/AT2G48120/AT1G49510/AT1G50900/AT5G26742/AT2G34620/AT5G44650/AT1G62750/AT5G23120/AT1G01790/AT1G44575/AT2G17240/AT4G34090/AT3G63190/AT1G79850/AT1G71720/AT1G68590/AT2G28000/AT5G21920…
6 DAS	GO:0042254	ribosome biogenesis	100/2670	349/21670	3.6844355296227e-14	3.19489514456794e-14	0.286532951289398	2.32553148106414	AT3G63140/AT1G09340/AT3G13180/AT2G37220/AT3G53460/AT2G48120/AT5G26742/AT4G25630/AT1G04640/AT3G52380/AT2G17240/AT5G15520/AT1G12244/AT4G28360/AT3G12930/AT4G34730/AT3G57150/AT2G04270/AT3G23700/AT3G10530/AT4G21770/AT3G28900/AT3G13740/AT5G66470/AT4G24770/AT1G15440/AT1G12800/AT1G15420/AT2G40700/AT1G25260/AT5G26180/AT1G72370/AT1G45230/AT3G18600/AT1G60000/AT3G49910/AT3G63490/AT5G13650/AT3G11964/AT5G16750…
6 DAS	GO:1901259	chloroplast rRNA processing	17/2670	21/21670	2.37267559383364e-10	2.05742499045715e-10	0.80952380952381	6.57018013197788	AT2G37220/AT3G53460/AT3G52380/AT2G17240/AT2G04270/AT4G24770/AT1G12800/AT1G45230/AT1G60000/AT3G46630/AT2G33800/AT1G01080/AT3G52150/AT1G06190/AT1G70070/AT5G50250/AT4G09730
6 DAS	GO:0009644	response to high light intensity	29/2670	63/21670	4.76199950313098e-09	4.12928628243525e-09	0.46031746031746	3.7359847809286	AT3G27690/AT3G54890/AT2G05100/AT5G54270/AT2G05070/AT3G61470/AT4G34190/AT1G61520/AT5G02120/AT5G66570/AT2G05620/AT3G50820/AT4G14890/AT3G47470/AT3G15850/AT1G55480/AT1G45474/AT4G26555/AT2G21970/AT1G67740/AT3G18780/AT2G47450/AT4G30950/AT5G18100/AT4G32770/AT3G55280/AT3G47860/AT2G30950/AT5G42270
6 DAS	GO:0009409	response to cold	93/2670	398/21670	5.86705302030973e-08	5.08751450712172e-08	0.233668341708543	1.89647676585173	AT5G10230/AT3G27690/AT5G58780/AT3G01500/AT3G05890/AT3G48360/AT4G15910/AT1G17190/AT2G45660/AT5G50950/AT3G54890/AT2G05100/AT3G61950/AT3G13960/AT3G62410/AT1G67090/AT2G01918/AT4G37930/AT1G20823/AT4G38840/AT2G05070/AT3G61470/AT4G04330/AT3G49260/AT2G39730/AT1G61520/AT1G09340/AT5G11790/AT1G42970/AT5G54770/AT1G32060/AT2G22840/AT1G55490/AT3G16690/AT3G08920/AT2G37220/AT3G53460/AT1G10930/AT2G28900/AT3G12780…
6 DAS	GO:0015977	carbon fixation	12/2670	17/21670	2.56580108365179e-06	2.2248904501596e-06	0.705882352941177	5.72901520158625	AT3G62410/AT1G12900/AT1G42970/AT1G32060/AT3G55800/AT3G12780/AT3G54050/AT5G61410/AT3G04790/AT3G26650/AT3G60750/AT1G56190
6 DAS	GO:0032544	plastid translation	13/2670	22/21670	1.35817604588241e-05	1.17771908873719e-05	0.590909090909091	4.79588014981273	AT3G63140/AT3G56910/AT2G38140/AT1G09340/AT2G17240/AT3G63190/AT1G79850/AT1G71720/AT1G68590/AT4G31850/AT3G62910/AT2G33800/AT5G54600
6 DAS	GO:0010054	trichoblast differentiation	38/2670	131/21670	1.37826282604326e-05	1.19513699600954e-05	0.290076335877863	2.35428996197501	AT4G15290/AT5G56540/AT3G01730/AT5G58010/AT4G34580/AT2G41970/AT4G02270/AT5G60660/AT2G03720/AT1G16440/AT2G26420/AT5G61350/AT1G52240/AT5G05500/AT3G62680/AT1G12040/AT5G65090/AT2G45890/AT1G12560/AT5G49270/AT1G12950/AT4G18640/AT3G11600/AT1G79840/AT4G17810/AT3G43960/AT2G20290/AT5G06270/AT3G18780/AT1G11130/AT3G60630/AT1G20090/AT5G55910/AT2G45160/AT1G74800/AT2G38120/AT4G02500/AT1G49240
6 DAS	GO:0009069	serine family amino acid metabolic process	23/2670	60/21670	1.38643324316679e-05	1.20222183323554e-05	0.383333333333333	3.11117353308365	AT4G13890/AT1G33320/AT1G32470/AT2G35370/AT4G37930/AT2G35120/AT3G02020/AT5G04120/AT1G11860/AT4G33010/AT2G26080/AT2G13360/AT3G62030/AT3G19480/AT3G03630/AT4G19710/AT5G28020/AT5G26780/AT3G04940/AT1G23310/AT5G14060/AT1G48420/AT4G29840
6 DAS	GO:0090558	plant epidermis development	66/2670	289/21670	2.00478933869476e-05	1.73841872725979e-05	0.228373702422145	1.85350491816026	AT4G15290/AT5G56540/AT3G01730/AT5G58010/AT4G34580/AT2G41970/AT4G02270/AT5G60660/AT2G03720/AT1G16440/AT2G26420/AT5G61350/AT1G52240/AT3G01500/AT5G05500/AT3G62680/AT5G10310/AT1G12040/AT5G65090/AT2G45890/AT1G25250/AT1G12560/AT5G49270/AT1G63650/AT5G44700/AT1G73360/AT4G12970/AT1G17920/AT1G12950/AT4G00480/AT4G18640/AT3G11600/AT5G07180/AT5G65530/AT5G67260/AT1G79840/AT4G17810/AT3G43960/AT2G20290/AT5G55480…
6 DAS	GO:0046148	pigment biosynthetic process	41/2670	150/21670	2.25154099458793e-05	1.95238519810422e-05	0.273333333333333	2.21840199750312	AT5G13930/AT4G26150/AT5G54190/AT1G80050/AT2G47460/AT4G03205/AT5G18660/AT1G03630/AT2G48120/AT5G11160/AT5G58250/AT1G30530/AT4G25080/AT3G14110/AT2G30390/AT5G57030/AT5G45930/AT1G31800/AT5G17230/AT1G28100/AT4G17600/AT5G13630/AT3G14930/AT3G51820/AT3G48730/AT4G27430/AT4G18480/AT3G53130/AT5G67030/AT4G34740/AT5G47110/AT3G03710/AT2G40490/AT2G35260/AT5G56860/AT3G56940/AT1G69935/AT5G08280/AT1G08520/AT4G27440…
6 DAS	GO:0090627	plant epidermal cell differentiation	46/2670	179/21670	3.19385748257417e-05	2.7694987960783e-05	0.256983240223464	2.08570292720691	AT4G15290/AT5G56540/AT3G01730/AT5G58010/AT4G34580/AT2G41970/AT4G02270/AT5G60660/AT2G03720/AT1G16440/AT2G26420/AT5G61350/AT1G52240/AT5G05500/AT3G62680/AT5G10310/AT1G12040/AT5G65090/AT2G45890/AT1G12560/AT5G49270/AT4G12970/AT1G12950/AT4G18640/AT3G11600/AT5G67260/AT1G79840/AT4G17810/AT3G43960/AT2G20290/AT5G55480/AT5G06270/AT3G18780/AT1G11130/AT4G34160/AT1G12860/AT3G60630/AT1G20090/AT5G55910/AT4G21750…
6 DAS	GO:0007017	microtubule-based process	56/2670	236/21670	3.5257485581085e-05	3.05729245598219e-05	0.23728813559322	1.92585539262363	AT1G09170/AT3G16120/AT1G11160/AT5G15600/AT3G23090/AT1G73860/AT4G38950/AT2G33460/AT3G17360/AT4G26760/AT2G01910/AT5G01840/AT5G15510/AT5G28290/AT1G20060/AT3G50240/AT1G59540/AT5G23910/AT5G55230/AT1G75780/AT4G18570/AT3G01450/AT2G47500/AT3G49650/AT5G27930/AT3G58650/AT3G60840/AT5G07590/AT1G53510/AT5G06670/AT2G28620/AT5G10470/AT5G51600/AT5G62700/AT2G37420/AT5G23430/AT2G36200/AT2G29550/AT3G45850/AT5G55280…
6 DAS	GO:0009629	response to gravity	30/2670	107/21670	0.000299579389013322	0.000259775134529034	0.280373831775701	2.2755434211908	AT3G17600/AT3G30350/AT5G66815/AT2G16005/AT5G13930/AT2G21650/AT1G25250/AT4G24670/AT2G14820/AT5G48010/AT2G23050/AT5G65683/AT5G50375/AT1G16510/AT3G20130/AT5G35220/AT5G51820/AT2G02950/AT4G00050/AT1G05630/AT5G17520/AT4G16340/AT5G14090/AT1G69935/AT5G19770/AT5G55910/AT5G58960/AT1G14350/AT2G38120/AT3G28860
6 DAS	GO:0045036	protein targeting to chloroplast	18/2670	49/21670	0.000317691299355467	0.000275480567273273	0.36734693877551	2.98142627837652	AT4G26670/AT1G02280/AT2G28900/AT5G22640/AT5G03940/AT1G04940/AT5G01590/AT2G47450/AT2G20890/AT4G35450/AT4G23940/AT2G45770/AT1G79560/AT3G46740/AT3G10350/AT3G16290/AT2G24020/AT3G47520
6 DAS	GO:0072596	establishment of protein localization to chloroplast	18/2670	49/21670	0.000317691299355467	0.000275480567273273	0.36734693877551	2.98142627837652	AT4G26670/AT1G02280/AT2G28900/AT5G22640/AT5G03940/AT1G04940/AT5G01590/AT2G47450/AT2G20890/AT4G35450/AT4G23940/AT2G45770/AT1G79560/AT3G46740/AT3G10350/AT3G16290/AT2G24020/AT3G47520
6 DAS	GO:0016122	xanthophyll metabolic process	9/2670	16/21670	0.000844760804608073	0.000732519858541266	0.5625	4.56530898876405	AT1G08550/AT5G57030/AT1G31800/AT1G28100/AT4G00370/AT4G32770/AT5G67030/AT3G03710/AT3G63520
6 DAS	GO:0006775	fat-soluble vitamin metabolic process	10/2670	23/21670	0.00427126872602714	0.00370375749669486	0.434782608695652	3.52874124735385	AT1G30520/AT1G68890/AT3G63410/AT1G60550/AT1G60600/AT4G17600/AT1G18870/AT4G32770/AT5G47110/AT3G01310
6 DAS	GO:0042362	fat-soluble vitamin biosynthetic process	10/2670	23/21670	0.00427126872602714	0.00370375749669486	0.434782608695652	3.52874124735385	AT1G30520/AT1G68890/AT3G63410/AT1G60550/AT1G60600/AT4G17600/AT1G18870/AT4G32770/AT5G47110/AT3G01310
6 DAS	GO:0009744	response to sucrose	20/2670	72/21670	0.00613380615664175	0.00531882491904599	0.277777777777778	2.25447357469829	AT4G39795/AT3G62410/AT1G42970/AT3G16690/AT2G28900/AT1G22160/AT5G44110/AT5G20700/AT1G74670/AT2G01830/AT1G16880/AT3G63210/AT5G04140/AT1G15440/AT3G26650/AT4G34160/AT1G20950/AT2G28190/AT4G38320/AT1G28330
6 DAS	GO:0007623	circadian rhythm	33/2670	150/21670	0.010462060262391	0.00907199631144397	0.22	1.78554307116105	AT1G59940/AT5G48890/AT3G48360/AT4G26150/AT5G15840/AT4G37930/AT3G46780/AT3G63140/AT4G09970/AT1G09340/AT5G02120/AT5G25830/AT3G01060/AT4G36240/AT3G20810/AT3G54500/AT2G21660/AT5G08330/AT5G58140/AT3G56480/AT4G32890/AT1G18330/AT2G40080/AT1G10470/AT1G68050/AT5G60100/AT2G47890/AT1G17455/AT3G19720/AT5G56860/AT1G19330/AT5G42900/AT3G04910
6 DAS	GO:0097577	sequestering of iron ion	7/2670	16/21670	0.0257691973209905	0.0223453179566631	0.4375	3.55079588014981	AT3G25190/AT3G11050/AT3G58060/AT1G76800/AT3G56090/AT4G27860/AT2G40300
6 DAS	GO:0045454	cell redox homeostasis	13/2670	45/21670	0.0330802795663629	0.0286849976659371	0.288888888888889	2.34465251768623	AT5G15230/AT3G14395/AT3G26060/AT3G02730/AT4G35090/AT5G16400/AT1G67740/AT3G11630/AT3G06730/AT3G52960/AT5G06290/AT1G48030/AT2G41680
6 DAS	GO:0019750	chloroplast localization	11/2670	35/21670	0.0334081335197622	0.028969290604549	0.314285714285714	2.55077581594436	AT1G12150/AT2G40480/AT1G15290/AT4G28080/AT5G58140/AT1G01320/AT3G25690/AT5G67385/AT5G10470/AT1G42550/AT5G55280
6 DAS	GO:0051644	plastid localization	11/2670	35/21670	0.0334081335197622	0.028969290604549	0.314285714285714	2.55077581594436	AT1G12150/AT2G40480/AT1G15290/AT4G28080/AT5G58140/AT1G01320/AT3G25690/AT5G67385/AT5G10470/AT1G42550/AT5G55280
6 DAS	GO:0006979	response to oxidative stress	76/2670	451/21670	0.0371729963899566	0.0322339269395428	0.168514412416851	1.36768064309857	AT5G15180/AT1G05250/AT3G01190/AT2G39040/AT5G19790/AT4G20190/AT5G24070/AT4G31870/AT5G67400/AT1G30870/AT5G22410/AT4G16270/AT5G13930/AT2G35380/AT5G37980/AT1G53130/AT1G34510/AT3G49960/AT2G34060/AT3G48360/AT3G11050/AT1G30850/AT5G42180/AT5G43750/AT4G30170/AT4G04840/AT4G26010/AT4G21870/AT2G26150/AT1G12480/AT3G49260/AT3G26060/AT2G40750/AT5G23310/AT1G44970/AT1G05260/AT1G71695/AT2G19310/AT5G63160/AT1G51400…
6 DAS	GO:0065001	specification of axis polarity	10/2670	32/21670	0.0491414439936365	0.0426121612252512	0.3125	2.53628277153558	AT5G10150/AT5G44700/AT2G28150/AT2G37630/AT4G20140/AT2G26580/AT2G34710/AT2G26330/AT2G45190/AT4G00180
10 DAS	GO:0015979	photosynthesis	155/3293	198/21670	1.14058462729997e-84	9.6390534636562e-85	0.782828282828283	5.15149981442116	AT3G01440/AT2G01590/AT1G14150/AT2G34430/AT5G64040/AT3G16250/AT5G49740/AT3G27690/AT1G70760/AT1G60950/AT1G18730/AT3G61470/AT3G54890/AT1G08380/AT1G75690/AT1G76570/AT1G64860/AT5G02120/AT2G30790/AT2G30570/AT1G20020/AT3G01500/AT1G61520/AT3G50820/AT2G28605/AT3G15850/AT5G54270/AT1G64770/AT5G66570/AT4G22890/AT1G32060/AT4G05180/AT1G43670/AT1G55370/AT1G05385/AT5G61410/AT2G05070/AT4G03280/AT1G34000/AT3G55800…
10 DAS	GO:0009657	plastid organization	176/3293	318/21670	1.10867431151891e-59	9.369380146575e-60	0.553459119496855	3.64210723337287	AT3G24650/AT4G26150/AT3G56290/AT5G08050/AT2G23410/AT5G56860/AT5G58770/AT5G62430/AT4G34740/AT1G62750/AT1G04770/AT1G15510/AT3G24560/AT2G41660/AT5G10470/AT2G46820/AT4G31850/AT1G32080/AT2G04270/AT4G25910/AT5G23120/AT3G29185/AT1G78600/AT1G64500/AT5G13770/AT5G35220/AT4G01150/AT5G07900/AT5G55580/AT3G56940/AT1G74730/AT4G28740/AT3G57180/AT5G24120/AT5G22640/AT2G30170/AT1G44000/AT2G32480/AT4G20130/AT3G46610…
10 DAS	GO:0034470	ncRNA processing	159/3293	388/21670	1.35580770357744e-32	1.14578985446758e-32	0.40979381443299	2.69669965343543	AT3G27970/AT1G55800/AT3G24560/AT5G13650/AT5G08600/AT1G04640/AT2G04270/AT3G13740/AT3G56330/AT3G57180/AT3G23700/AT4G27010/AT1G09340/AT1G10490/AT1G45230/AT1G15440/AT5G59980/AT3G63110/AT2G39670/AT2G34260/AT5G26742/AT2G40570/AT3G06530/AT3G53460/AT1G67120/AT2G37220/AT5G54910/AT2G04530/AT2G45730/AT3G10530/AT3G57940/AT1G01860/AT1G01210/AT1G79880/AT3G21540/AT4G04940/AT5G27990/AT5G60990/AT4G26600/AT4G18905…
10 DAS	GO:0042254	ribosome biogenesis	140/3293	349/21670	1.30939896789176e-27	1.10656994270058e-27	0.401146131805158	2.63979249201876	AT3G27970/AT1G55800/AT1G29430/AT5G13650/AT5G08600/AT1G04640/AT2G04270/AT3G13740/AT3G57180/AT3G23700/AT4G27010/AT1G09340/AT1G10490/AT1G45230/AT1G15440/AT4G34730/AT2G39670/AT2G34260/AT5G26742/AT3G06530/AT3G53460/AT1G67120/AT2G37220/AT5G54910/AT3G10530/AT3G57940/AT1G01860/AT3G21540/AT4G04940/AT5G27990/AT3G04770/AT5G60990/AT4G26600/AT4G18905/AT3G58660/AT3G63140/AT3G55510/AT1G15420/AT1G60000/AT2G31890…
10 DAS	GO:0009409	response to cold	125/3293	398/21670	2.46101830642114e-14	2.07980069719029e-14	0.314070351758794	2.06677938737111	AT5G40420/AT3G55580/AT5G10230/AT4G25140/AT2G42560/AT1G52690/AT4G04330/AT4G25480/AT5G52310/AT5G52300/AT4G25490/AT2G23410/AT2G15970/AT3G27690/AT5G58770/AT4G38840/AT4G35090/AT2G45660/AT4G25470/AT3G61470/AT1G10760/AT3G54890/AT3G01570/AT5G15960/AT5G54770/AT3G01500/AT1G61520/AT3G50980/AT5G51820/AT1G32060/AT5G13650/AT5G61410/AT2G05070/AT2G36400/AT2G21490/AT1G12860/AT3G16690/AT4G16860/AT2G01918/AT3G54050…
10 DAS	GO:0009642	response to light intensity	60/3293	146/21670	3.67560517705667e-12	3.10624516278203e-12	0.410958904109589	2.7043666723519	AT3G27690/AT1G60950/AT3G61470/AT3G54890/AT5G02120/AT3G48390/AT1G61520/AT3G50820/AT3G15850/AT5G54270/AT2G28190/AT5G66570/AT2G05070/AT1G34000/AT3G47860/AT4G32770/AT4G14890/AT3G19480/AT3G02730/AT2G05620/AT3G57180/AT3G47470/AT1G03600/AT5G16400/AT4G34190/AT2G47450/AT2G05100/AT4G04020/AT4G04850/AT2G43010/AT1G45474/AT1G07350/AT1G55480/AT2G21970/AT1G67740/AT2G30950/AT5G46110/AT1G08810/AT1G69935/AT3G59220…
10 DAS	GO:0072598	protein localization to chloroplast	28/3293	52/21670	6.81093846747872e-09	5.75590784360397e-09	0.538461538461538	3.54341376813287	AT5G55210/AT4G26670/AT5G22640/AT5G57180/AT2G28900/AT2G47450/AT2G04030/AT4G15810/AT2G45770/AT2G28800/AT4G35450/AT5G03940/AT5G52440/AT5G01590/AT1G02280/AT2G20890/AT4G02510/AT2G31530/AT2G24020/AT5G23040/AT3G10350/AT5G64580/AT3G04340/AT5G05000/AT5G50920/AT4G24280/AT1G06950/AT3G16290
10 DAS	GO:0005982	starch metabolic process	33/3293	75/21670	1.13705112875009e-07	9.60919195174308e-08	0.44	2.89547525053143	AT1G10760/AT5G49190/AT5G51820/AT1G43670/AT3G55800/AT5G64860/AT1G42430/AT5G19220/AT2G01940/AT2G36390/AT5G26570/AT3G20440/AT3G55760/AT1G11720/AT4G18240/AT3G16000/AT5G04360/AT2G40840/AT4G17090/AT1G69830/AT3G01180/AT1G15690/AT1G32900/AT5G40870/AT5G03650/AT2G39930/AT1G03310/AT5G55700/AT3G52180/AT4G32190/AT2G41680/AT5G22510/AT3G01510
10 DAS	GO:0007623	circadian rhythm	51/3293	150/21670	3.24595737269799e-07	2.74315082873341e-07	0.34	2.23741269359247	AT4G26150/AT5G52310/AT1G18330/AT5G56860/AT3G46780/AT3G57040/AT3G15620/AT5G12050/AT5G02120/AT3G48100/AT5G17300/AT3G01060/AT5G08330/AT5G06980/AT5G02810/AT4G37930/AT1G68050/AT1G09340/AT3G54500/AT2G21320/AT3G19720/AT2G47890/AT5G02840/AT1G22770/AT5G58140/AT5G60100/AT3G63140/AT5G23280/AT5G28770/AT2G46790/AT5G64170/AT5G10140/AT3G45780/AT2G21660/AT5G24470/AT1G68830/AT4G26700/AT2G46830/AT3G06080/AT3G09600…
10 DAS	GO:0006457	protein folding	61/3293	195/21670	4.37024288373066e-07	3.69328183084167e-07	0.312820512820513	2.05855466529624	AT1G59860/AT1G54050/AT5G48570/AT4G04330/AT2G29500/AT3G12580/AT1G07400/AT5G12030/AT2G32120/AT5G37670/AT1G53540/AT2G19310/AT5G52640/AT2G20560/AT3G62510/AT3G47650/AT1G26230/AT2G21130/AT4G21870/AT4G32208/AT5G45680/AT2G46240/AT4G26780/AT5G56030/AT2G25140/AT2G04030/AT3G07770/AT3G13470/AT3G60210/AT2G28000/AT4G35450/AT4G39960/AT5G56010/AT5G18820/AT5G55220/AT3G17830/AT1G49245/AT2G30695/AT1G80030/AT5G09590…
10 DAS	GO:0046148	pigment biosynthetic process	50/3293	150/21670	8.90609642893261e-07	7.52652083643958e-07	0.333333333333333	2.1935418564632	AT4G26150/AT5G56860/AT2G35260/AT4G34740/AT1G71030/AT1G03630/AT1G74470/AT5G67030/AT5G13630/AT1G78600/AT5G17230/AT3G56940/AT1G31800/AT3G59400/AT3G57180/AT4G27440/AT5G18660/AT4G15560/AT1G58290/AT2G30390/AT5G44190/AT3G53130/AT5G57030/AT4G25080/AT3G03710/AT3G14110/AT5G45930/AT3G25710/AT1G69935/AT1G28100/AT5G58250/AT4G27430/AT4G14210/AT1G44446/AT3G10230/AT2G48120/AT4G17880/AT5G47110/AT3G51820/AT4G17600…
10 DAS	GO:0016108	tetraterpenoid metabolic process	20/3293	36/21670	9.44774009405757e-07	7.98426260512792e-07	0.555555555555556	3.65590309410534	AT1G08550/AT4G19170/AT5G67030/AT4G32770/AT5G17230/AT1G31800/AT3G57180/AT3G53130/AT5G57030/AT3G03710/AT4G00370/AT1G28100/AT3G63520/AT4G14210/AT3G10230/AT2G48120/AT2G21860/AT4G31390/AT5G61670/AT1G63970
10 DAS	GO:0016116	carotenoid metabolic process	20/3293	36/21670	9.44774009405757e-07	7.98426260512792e-07	0.555555555555556	3.65590309410534	AT1G08550/AT4G19170/AT5G67030/AT4G32770/AT5G17230/AT1G31800/AT3G57180/AT3G53130/AT5G57030/AT3G03710/AT4G00370/AT1G28100/AT3G63520/AT4G14210/AT3G10230/AT2G48120/AT2G21860/AT4G31390/AT5G61670/AT1G63970
10 DAS	GO:0009110	vitamin biosynthetic process	33/3293	83/21670	1.69938868487796e-06	1.43614932176033e-06	0.397590361445783	2.61639329867298	AT2G38230/AT2G38210/AT5G59750/AT1G30520/AT5G54770/AT5G53580/AT1G74470/AT3G16050/AT2G29630/AT4G32770/AT5G11540/AT1G18870/AT5G28840/AT2G46110/AT2G22450/AT5G48840/AT4G26850/AT3G01310/AT1G68890/AT2G43360/AT3G02870/AT5G60540/AT1G64970/AT3G63410/AT1G60550/AT5G47110/AT1G60600/AT4G17600/AT4G33670/AT5G04490/AT5G01410/AT1G22940/AT2G44050
10 DAS	GO:0051644	plastid localization	18/3293	35/21670	1.79825418581935e-05	1.51970032064948e-05	0.514285714285714	3.38432172140037	AT4G28080/AT5G10470/AT1G64500/AT1G15290/AT1G66840/AT1G42550/AT5G58140/AT3G25690/AT5G67385/AT5G55280/AT2G40480/AT5G38150/AT1G75100/AT3G45780/AT1G01320/AT2G30520/AT5G05000/AT3G52140
10 DAS	GO:0032544	plastid translation	13/3293	22/21670	7.58279187773513e-05	6.40819931847497e-05	0.590909090909091	3.88855147282114	AT4G31850/AT3G46610/AT1G09340/AT3G62910/AT1G71720/AT2G38140/AT3G63190/AT3G56910/AT3G63140/AT1G68590/AT2G39140/AT5G54600/AT1G70200
10 DAS	GO:0015977	carbon fixation	11/3293	17/21670	0.00012621951623915	0.000106667811933083	0.647058823529412	4.25805183901681	AT1G32060/AT5G61410/AT3G55800/AT3G54050/AT1G12900/AT1G42970/AT3G26650/AT3G62410/AT3G12780/AT3G60750/AT2G47400
10 DAS	GO:0010608	posttranscriptional regulation of gene expression	64/3293	256/21670	0.000604428893022978	0.00051080141493918	0.25	1.6451563923474	AT1G74310/AT4G21320/AT2G32550/AT2G28190/AT5G02160/AT2G25900/AT4G31850/AT5G24490/AT5G45150/AT1G09340/AT3G57190/AT3G17040/AT2G19930/AT3G16810/AT5G20220/AT1G20340/AT3G53460/AT3G17330/AT1G71720/AT4G34830/AT5G08650/AT3G63140/AT5G62030/AT2G31890/AT4G13170/AT4G16390/AT3G07750/AT1G79270/AT2G31660/AT3G42670/AT2G19910/AT5G19820/AT4G24770/AT5G39900/AT1G70070/AT1G60080/AT4G31790/AT1G55500/AT3G07590/AT2G27840…
10 DAS	GO:0006006	glucose metabolic process	18/3293	45/21670	0.000983165795826361	0.000830871067589449	0.4	2.63225022775585	AT4G26530/AT4G26520/AT1G43670/AT3G55800/AT5G64860/AT2G21330/AT3G54050/AT1G12900/AT5G64380/AT1G42970/AT3G26650/AT4G38970/AT4G26850/AT5G35790/AT3G12780/AT1G01320/AT2G36460/AT3G06483
10 DAS	GO:0000302	response to reactive oxygen species	43/3293	162/21670	0.00232917578448087	0.00196838089655929	0.265432098765432	1.74670925607255	AT2G26150/AT1G59860/AT1G54050/AT2G29500/AT1G07400/AT5G52310/AT5G12030/AT5G37670/AT1G53540/AT2G19310/AT4G35090/AT5G05410/AT2G28190/AT4G21870/AT1G51400/AT5G13650/AT5G63160/AT3G56090/AT5G55580/AT2G40300/AT1G77490/AT4G09010/AT1G22770/AT3G14110/AT2G37860/AT3G47450/AT3G23020/AT2G44270/AT5G58070/AT1G12520/AT4G33630/AT1G05690/AT5G51020/AT5G18100/AT4G08920/AT5G01600/AT4G17040/AT4G32320/AT1G18150/AT2G41680…
10 DAS	GO:0045454	cell redox homeostasis	17/3293	45/21670	0.00310334543006756	0.00262262981637988	0.377777777777778	2.48601410399163	AT1G48130/AT5G06690/AT4G35090/AT3G02730/AT5G16400/AT3G26060/AT3G16950/AT1G67740/AT3G06730/AT1G76080/AT4G16155/AT5G61440/AT5G06290/AT2G41680/AT3G04340/AT5G54290/AT5G10860
10 DAS	GO:0010431	seed maturation	26/3293	85/21670	0.0040421930875151	0.00341604773099686	0.305882352941176	2.01289723298976	AT1G48130/AT5G45830/AT4G28520/AT2G29090/AT2G40170/AT5G49190/AT5G44120/AT3G47860/AT3G48740/AT3G63210/AT5G56780/AT5G65410/AT5G52920/AT2G17820/AT3G26744/AT5G58070/AT1G32440/AT5G23660/AT3G22960/AT2G01570/AT2G27840/AT4G21750/AT4G32320/AT1G14920/AT1G01040/AT3G06010
10 DAS	GO:0010305	leaf vascular tissue pattern formation	13/3293	31/21670	0.00488310193725007	0.00412669779296067	0.419354838709677	2.75961717426016	AT3G54720/AT5G43870/AT2G32010/AT4G14740/AT1G11130/AT1G08300/AT2G01950/AT1G48920/AT4G13750/AT4G07410/AT1G09700/AT5G55540/AT1G48410
10 DAS	GO:0010158	abaxial cell fate specification	7/3293	11/21670	0.00534877354927462	0.00452023576089184	0.636363636363636	4.1876708168843	AT2G45190/AT2G26580/AT2G33860/AT4G00180/AT1G32240/AT5G60450/AT5G16560
10 DAS	GO:0009069	serine family amino acid metabolic process	20/3293	60/21670	0.00544942283713883	0.00460529423385221	0.333333333333333	2.1935418564632	AT1G33320/AT2G13360/AT1G32470/AT4G33010/AT3G19480/AT2G35370/AT4G37930/AT1G23310/AT4G19710/AT2G26080/AT5G14060/AT1G16460/AT3G04940/AT1G11860/AT5G28020/AT2G17640/AT4G32520/AT1G48420/AT4G29840/AT1G31230
10 DAS	GO:0034309	primary alcohol biosynthetic process	6/3293	10/21670	0.0181287195051123	0.0153205375870323	0.6	3.94837534163377	AT5G54770/AT2G29630/AT5G47110/AT4G17600/AT4G34020/AT1G22940
10 DAS	GO:0009553	embryo sac development	38/3293	155/21670	0.0190175656482227	0.0160716993412186	0.245161290322581	1.61331465572132	AT1G76110/AT1G15330/AT5G63160/AT5G24120/AT2G34860/AT1G15440/AT4G14040/AT5G59980/AT2G34260/AT1G67120/AT4G37890/AT5G57880/AT3G08510/AT5G45140/AT1G72440/AT3G06430/AT2G47990/AT4G05410/AT3G11964/AT4G05440/AT1G05690/AT5G41190/AT4G14790/AT1G29940/AT3G56990/AT1G16280/AT2G20490/AT5G48030/AT3G60360/AT5G07180/AT2G04660/AT3G23940/AT5G52820/AT1G06220/AT4G15570/AT2G31170/AT1G03430/AT5G05970
10 DAS	GO:0006913	nucleocytoplasmic transport	30/3293	118/21670	0.0281886161715543	0.0238221322504846	0.254237288135593	1.67304039899736	AT1G66080/AT1G67120/AT2G21660/AT5G24470/AT1G72560/AT2G31660/AT5G19820/AT1G63810/AT3G49990/AT4G32910/AT4G27640/AT5G03070/AT3G63130/AT3G57350/AT2G05120/AT1G33410/AT1G24310/AT5G09860/AT3G14120/AT5G02530/AT1G72320/AT4G16143/AT4G38760/AT1G13160/AT5G58590/AT2G03820/AT1G12930/AT1G14850/AT4G19210/AT3G10650
10 DAS	GO:0051169	nuclear transport	30/3293	118/21670	0.0281886161715543	0.0238221322504846	0.254237288135593	1.67304039899736	AT1G66080/AT1G67120/AT2G21660/AT5G24470/AT1G72560/AT2G31660/AT5G19820/AT1G63810/AT3G49990/AT4G32910/AT4G27640/AT5G03070/AT3G63130/AT3G57350/AT2G05120/AT1G33410/AT1G24310/AT5G09860/AT3G14120/AT5G02530/AT1G72320/AT4G16143/AT4G38760/AT1G13160/AT5G58590/AT2G03820/AT1G12930/AT1G14850/AT4G19210/AT3G10650
10 DAS	GO:0048509	regulation of meristem development	18/3293	61/21670	0.0348238793967065	0.0294295773660721	0.295081967213115	1.94182393850841	AT5G39860/AT5G62430/AT2G45190/AT5G20740/AT5G44160/AT2G26580/AT3G15150/AT1G27370/AT2G34720/AT4G00180/AT5G14530/AT3G49180/AT1G33410/AT4G29720/AT1G74660/AT4G00650/AT2G18740/AT4G40060
10 DAS	GO:0046700	heterocycle catabolic process	50/3293	226/21670	0.0361133095217069	0.0305192716873037	0.221238938053097	1.45589061269682	AT5G53580/AT2G25900/AT4G31850/AT3G57190/AT5G43860/AT3G53460/AT3G17330/AT2G33980/AT3G03710/AT1G71720/AT5G14580/AT4G34830/AT4G37000/AT2G31890/AT4G04955/AT5G39840/AT2G26550/AT2G14170/AT3G07750/AT1G79270/AT3G46210/AT5G04900/AT4G37510/AT2G20890/AT3G61620/AT4G27490/AT4G24770/AT4G14790/AT1G60080/AT1G55500/AT4G31390/AT1G56310/AT1G54440/AT5G61020/AT1G09810/AT3G12990/AT4G17050/AT1G01040/AT2G45620/AT4G20070…
10 DAS	GO:0009743	response to carbohydrate	37/3293	157/21670	0.03821428288967	0.0322947992663009	0.235668789808917	1.55084806412367	AT5G45830/AT4G37220/AT5G52310/AT5G23750/AT5G56860/AT2G28190/AT1G43670/AT3G16690/AT3G57540/AT5G67030/AT4G39795/AT1G42970/AT5G04140/AT2G28900/AT1G15440/AT3G63210/AT5G24800/AT3G26650/AT3G62410/AT1G73660/AT1G08810/AT5G28770/AT1G78580/AT1G56570/AT1G74670/AT4G00238/AT4G04040/AT2G19860/AT2G47400/AT1G16880/AT2G20890/AT1G28330/AT5G20700/AT1G72320/AT1G22160/AT3G48430/AT4G15900
10 DAS	GO:0009616	RNAi-mediated antiviral immune response	6/3293	12/21670	0.0461206261253426	0.038976431065168	0.5	3.29031278469481	AT5G23570/AT1G05460/AT5G20320/AT1G01040/AT3G03300/AT1G48410
