# Supplementary material for: Seed Transmission of Pathogens: Non-Canonical Immune Response in Arabidopsis Germinating Seeds Compared to Early Seedlings against the Necrotrophic Fungus Alternaria brassicicola
Source: Plants (Basel). 2022 Jun 28;11(13):1708. doi: 10.3390/plants11131708 (PMC9269218; doi:10.3390/plants11131708)
Supplement: Supplementary file 1 [file plants-11-01708-s001.zip › Supplementary Table S3. Heatmap for the number DEGs _GO defense.xlsx]

## Sheet: Summary
Supplementary Table S3: Heatmap for the number of differentially expressed genes (DEGs) assigned to SA, JA, ET, indole and ROS pathways at 3, 6 and 10 days after sowing (DAS). The selected GO terms from biological process related to JA, ET, SA, ROS, Indole, phytoalexin and glucosinolate pathways were: jasmonic acid metabolic process (GO:0009694), response to ethylene (GO:0009723), response to rea…
GO terms summary for grouped genes and its respective quantity at 3, 6 and 10 DAS
Cluster	GO ID	GO term	Count	geneID
3 DAS	GO:0009694	jasmonic acid metabolic process	0	0
6 DAS	GO:0009694	jasmonic acid metabolic process	22	AT1G72520/AT1G55020/AT5G07010/AT1G05800/AT1G17420/AT3G48520/AT1G20510/AT3G45140/AT5G10300/AT3G25780/AT5G63980/AT4G16760/AT2G06050/AT1G44350/AT5G42650/AT3G25760/AT1G67560/AT4G29010/AT2G33150/AT3G25770/AT2G35690/AT4G05160
10 DAS	GO:0009694	jasmonic acid metabolic process	26	AT1G55020/AT5G07010/AT3G45140/AT3G25780/AT1G72520/AT1G05800/AT1G20510/AT1G44350/AT1G17420/AT2G23620/AT1G67560/AT2G06050/AT5G63980/AT5G10300/AT4G16760/AT3G48520/AT1G13280/AT1G76690/AT2G33150/AT5G42650/AT4G19045/AT5G45550/AT4G05160/AT1G61850/AT3G25770/AT4G29010
3 DAS	GO:0009723	response to ethylene	41	AT5G40990/AT3G23230/AT2G41230/AT1G21320/AT1G15520/AT4G17490/AT3G15356/AT1G25220/AT5G05730/AT5G47220/AT5G07690/AT2G31230/AT1G65484/AT4G02380/AT1G07135/AT1G29860/AT5G10520/AT5G64900/AT5G47230/AT2G33710/AT1G59950/AT4G11280/AT5G67080/AT5G25190/AT5G56260/AT3G51450/AT2G07180/AT1G28360/AT3G23150/AT5G57760/AT1G17330/AT3G15210/AT5G05550/AT3G15530/AT4G38495/AT1G78080/AT5G53560/AT1G50640/AT5G25350/AT5G60680…
6 DAS	GO:0009723	response to ethylene	118	AT1G15520/AT5G40990/AT3G23230/AT4G11280/AT3G23240/AT3G15356/AT1G59950/AT4G17490/AT5G44420/AT1G29860/AT2G41230/AT1G25220/AT5G05730/AT1G07135/AT1G70920/AT2G41225/AT1G68765/AT2G31230/AT5G47220/AT1G04370/AT2G33710/AT3G04720/AT1G06160/AT4G13395/AT2G44840/AT3G51450/AT5G47230/AT1G18300/AT1G28370/AT3G50480/AT2G41640/AT5G67080/AT1G21320/AT3G48640/AT4G29780/AT5G64900/AT5G10520/AT2G27310/AT1G73540/AT1G03800…
10 DAS	GO:0009723	response to ethylene	105	AT1G15520/AT1G59950/AT3G15356/AT5G40990/AT3G23240/AT5G67080/AT3G23230/AT3G04720/AT5G05730/AT4G11280/AT4G17490/AT1G06160/AT1G25220/AT1G29860/AT2G41230/AT3G51450/AT3G12500/AT1G07135/AT1G56160/AT2G30550/AT2G31230/AT4G02380/AT5G44420/AT5G57910/AT1G28370/AT2G44840/AT5G47220/AT1G73500/AT1G23320/AT3G56400/AT3G51430/AT3G48640/AT3G50480/AT1G03800/AT2G33710/AT5G64900/AT1G21320/AT1G68765/AT3G52430/AT2G27310…
3 DAS	GO:0009751	response to salicylic acid	92	AT1G66700/AT5G40990/AT1G56250/AT1G56240/AT1G79680/AT1G26420/AT5G24110/AT4G23280/AT4G22030/AT5G65600/AT5G36970/AT5G57010/AT1G51920/AT1G53625/AT3G26230/AT5G22520/AT4G12500/AT5G52750/AT1G06137/AT3G18250/AT4G11070/AT4G26120/AT4G21903/AT5G41750/AT4G14450/AT1G15520/AT1G36622/AT4G23810/AT2G29720/AT3G02800/AT1G13520/AT2G25735/AT1G07620/AT4G11521/AT1G80840/AT5G47850/AT4G35180/AT5G46295/AT1G30755/AT1G65484…
6 DAS	GO:0009751	response to salicylic acid	273	AT1G15520/AT1G79680/AT5G40990/AT4G22030/AT1G66700/AT5G36970/AT1G56250/AT3G13433/AT1G06137/AT5G24110/AT5G65600/AT1G51920/AT1G53625/AT2G44070/AT5G47850/AT4G03450/AT1G56240/AT1G26420/AT1G21240/AT2G04495/AT5G41750/AT1G36622/AT3G29000/AT4G23280/AT3G18250/AT5G52750/AT4G14365/AT1G13520/AT3G26230/AT4G14450/AT3G50930/AT1G21250/AT2G32140/AT3G25240/AT2G18690/AT1G07620/AT5G60900/AT3G47090/AT4G12500/AT4G11070…
10 DAS	GO:0009751	response to salicylic acid	269	AT5G36970/AT1G15520/AT1G06137/AT1G79680/AT3G44860/AT1G21240/AT2G44070/AT5G40990/AT1G56250/AT1G21250/AT3G18250/AT4G21840/AT5G57010/AT1G56240/AT5G54610/AT4G03450/AT5G67080/AT4G22030/AT4G35180/AT1G76930/AT2G01300/AT1G21310/AT2G14560/AT3G13950/AT4G23030/AT3G50930/AT2G13810/AT3G55840/AT2G33380/AT2G32140/AT3G51450/AT5G60900/AT2G04070/AT3G13433/AT5G22520/AT1G07135/AT2G30550/AT1G28480/AT4G14450/AT3G29000…
3 DAS	GO:0000302	response to reactive oxygen species	0	0
6 DAS	GO:0000302	response to reactive oxygen species	61	AT1G15520/AT3G02840/AT4G23150/AT5G24110/AT5G42380/AT1G72520/AT1G09080/AT1G61120/AT3G28580/AT4G25100/AT5G05300/AT1G13520/AT4G17490/AT4G11170/AT5G46350/AT1G19020/AT5G24640/AT1G16420/AT2G41730/AT3G10930/AT4G23810/AT1G77120/AT3G50310/AT3G10985/AT1G73260/AT3G08640/AT4G23100/AT5G55120/AT5G39610/AT4G02380/AT4G12720/AT3G56400/AT2G06050/AT1G05680/AT3G13610/AT4G18880/AT1G08830/AT3G17790/AT1G34420/AT2G17420…
10 DAS	GO:0000302	response to reactive oxygen species	62	AT1G15520/AT4G23150/AT4G25100/AT1G16420/AT1G61120/AT4G21830/AT5G46350/AT3G02840/AT1G09080/AT4G17490/AT5G05300/AT1G72520/AT3G28580/AT4G23140/AT4G11170/AT1G04580/AT1G73260/AT4G02380/AT1G13520/AT1G19020/AT3G10930/AT1G66950/AT5G42380/AT3G56240/AT3G56400/AT2G06050/AT3G10985/AT1G77120/AT3G08640/AT2G41730/AT4G26070/AT4G23100/AT5G24110/AT1G05680/AT1G52760/AT5G39610/AT4G12720/AT2G17420/AT3G01420/AT5G10720…
3 DAS	GO:0042430	indole-containing compound metabolic process	57	AT2G30770/AT1G56250/AT1G56240/AT1G21100/AT1G21120/AT1G26420/AT2G15220/AT3G26830/AT2G43000/AT5G57220/AT2G29460/AT1G51920/AT1G53625/AT5G03390/AT1G18570/AT4G21903/AT5G41750/AT4G28085/AT1G25220/AT2G38470/AT2G46650/AT3G02800/AT1G13520/AT5G05730/AT2G24180/AT5G14700/AT4G39950/AT3G54640/AT2G23680/AT3G29000/AT1G24145/AT1G07135/AT5G54810/AT4G30530/AT2G22330/AT1G53080/AT2G04400/AT1G17147/AT2G32030/AT5G17990…
6 DAS	GO:0042430	indole-containing compound metabolic process	113	AT2G30770/AT1G56250/AT1G51920/AT1G53625/AT1G56240/AT1G26420/AT3G26830/AT5G57220/AT2G29460/AT2G43000/AT2G15220/AT1G21120/AT5G41750/AT4G39950/AT3G29000/AT1G21100/AT1G13520/AT5G14700/AT2G24180/AT2G18690/AT1G25220/AT5G05730/AT3G54640/AT1G24145/AT2G38470/AT1G07135/AT1G53080/AT2G22330/AT2G46650/AT2G32030/AT5G12930/AT5G17990/AT5G03390/AT1G18570/AT5G25930/AT4G27070/AT3G57460/AT3G55840/AT5G48657/AT2G04400…
10 DAS	GO:0042430	indole-containing compound metabolic process	115	AT2G30770/AT3G26830/AT2G29460/AT5G14700/AT4G39950/AT4G28085/AT1G56250/AT1G56240/AT2G46650/AT5G05730/AT1G44542/AT4G30230/AT1G25220/AT1G06620/AT3G44300/AT2G15220/AT1G54020/AT3G54640/AT3G55840/AT2G24180/AT4G27070/AT2G22330/AT1G76640/AT3G57460/AT5G17990/AT1G07135/AT3G29000/AT4G01895/AT2G20562/AT5G12930/AT4G29690/AT5G40210/AT3G02800/AT5G03390/AT5G54810/AT2G04400/AT5G41750/AT1G13520/AT4G37430/AT5G48657…
3 DAS	GO:0052315	phytoalexin biosynthetic process	11	AT2G30770/AT1G56250/AT3G26830/AT2G43000/AT2G29460/AT5G41750/AT2G38470/AT1G13520/AT4G39950/AT4G30530/AT2G22330
6 DAS	GO:0052315	phytoalexin biosynthetic process	20	AT2G30770/AT1G56250/AT3G26830/AT2G29460/AT2G43000/AT5G41750/AT4G39950/AT1G13520/AT2G18690/AT2G38470/AT2G22330/AT4G30530/AT4G23100/AT1G73500/AT3G56400/AT3G52430/AT4G27260/AT3G28940/AT3G45640/AT1G53390
10 DAS	GO:0052315	phytoalexin biosynthetic process	20	AT2G30770/AT3G26830/AT2G29460/AT4G39950/AT1G56250/AT2G22330/AT5G41750/AT1G13520/AT4G30530/AT1G73500/AT3G56400/AT2G38470/AT2G43000/AT2G18690/AT3G52430/AT4G23100/AT3G28940/AT3G45640/AT4G27260/AT1G53390
3 DAS	GO:0019761	glucosinolate biosynthetic process	11	AT5G57220/AT1G18570/AT5G07690/AT2G22330/AT1G16410/AT4G39940/AT1G18590/AT4G31500/AT1G74100/AT2G14750/AT1G24100
6 DAS	GO:0019761	glucosinolate biosynthetic process	21	AT5G57220/AT1G18590/AT2G22330/AT4G39940/AT1G18570/AT1G65860/AT1G74100/AT1G24100/AT4G31500/AT2G20610/AT1G74090/AT4G23100/AT2G14750/AT3G56400/AT1G62570/AT1G32640/AT2G25450/AT5G14200/AT1G07640/AT2G43090/AT4G13430
10 DAS	GO:0019761	glucosinolate biosynthetic process	28	AT1G65860/AT1G16410/AT3G19710/AT5G23010/AT3G58990/AT4G39940/AT1G18590/AT2G43100/AT5G14200/AT1G62560/AT1G16400/AT5G23020/AT2G22330/AT4G13770/AT1G24100/AT3G56400/AT4G12030/AT2G20610/AT1G62540/AT1G18570/AT1G74090/AT1G74100/AT4G31500/AT4G23100/AT2G14750/AT2G25450/AT1G32640/AT4G13430

## Sheet: JA
Differentially expressed genes (DEGs) assigned to JA with its respective log2(FC), gene symbol and TAIR description. Gene symbol and TAIR description were taken from The Arabidopsis Information Resource (TAIR)
JA: jasmonic acid metabolic process (GO:0009694)
Cluster	geneID	log2(FC)	Gene Symbol	TAIR Description
3 DAS	0	0	0	0
6 DAS	AT1G72520	6.5171	LOX4	PLAT/LH2 domain-containing lipoxygenase family protein;(source:Araport11)
6 DAS	AT1G55020	4.67607	LOX1	lipoxygenase 1;(source:Araport11)
6 DAS	AT5G07010	4.57069	ST2A	sulfotransferase 2A;(source:Araport11)
6 DAS	AT1G05800	3.9869	DGL	alpha/beta-Hydrolases superfamily protein;(source:Araport11)
6 DAS	AT1G17420	3.17077	LOX3	lipoxygenase 3;(source:Araport11)
6 DAS	AT3G48520	2.95509	CYP94B3	cytochrome P450, family 94, subfamily B, polypeptide 3;(source:Araport11)
6 DAS	AT1G20510	2.48018	OPCL1	OPC-8:0 CoA ligase1;(source:Araport11)
6 DAS	AT3G45140	2.44536	LOX2	lipoxygenase 2;(source:Araport11)
6 DAS	AT5G10300	2.13942	MES5	methyl esterase 5;(source:Araport11)
6 DAS	AT3G25780	2.03714	AOC3	allene oxide cyclase 3;(source:Araport11)
6 DAS	AT5G63980	1.89971	SAL1	SAL1 phosphatase-like protein;(source:Araport11)
6 DAS	AT4G16760	1.57667	ACX1	acyl-CoA oxidase 1;(source:Araport11)
6 DAS	AT2G06050	1.57042	OPR3	oxophytodienoate-reductase 3;(source:Araport11)
6 DAS	AT1G44350	1.53954	ILL6	IAA-amino acid hydrolase ILR1-like 6;(source:Araport11)
6 DAS	AT5G42650	1.46426	AOS	allene oxide synthase;(source:Araport11)
6 DAS	AT3G25760	1.43383	AOC1	allene oxide cyclase 1;(source:Araport11)
6 DAS	AT1G67560	1.07597	LOX6	PLAT/LH2 domain-containing lipoxygenase family protein;(source:Araport11)
6 DAS	AT4G29010	0.806131	AIM1	Enoyl-CoA hydratase/isomerase family;(source:Araport11)
6 DAS	AT2G33150	0.775264	PKT3	peroxisomal 3-ketoacyl-CoA thiolase 3;(source:Araport11)
6 DAS	AT3G25770	0.666175	AOC2	allene oxide cyclase 2;(source:Araport11)
6 DAS	AT2G35690	0.61236	ACX5	acyl-CoA oxidase 5;(source:Araport11)
6 DAS	AT4G05160	0.611703	AT4G05160	AMP-dependent synthetase and ligase family protein;(source:Araport11)
10 DAS	AT1G55020	4.38196	LOX1	lipoxygenase 1;(source:Araport11)
10 DAS	AT5G07010	3.63989	ST2A	sulfotransferase 2A;(source:Araport11)
10 DAS	AT3G45140	3.37627	LOX2	lipoxygenase 2;(source:Araport11)
10 DAS	AT3G25780	3.08254	AOC3	allene oxide cyclase 3;(source:Araport11)
10 DAS	AT1G72520	2.99621	LOX4	PLAT/LH2 domain-containing lipoxygenase family protein;(source:Araport11)
10 DAS	AT1G05800	2.45614	DGL	alpha/beta-Hydrolases superfamily protein;(source:Araport11)
10 DAS	AT1G20510	2.10487	OPCL1	OPC-8:0 CoA ligase1;(source:Araport11)
10 DAS	AT1G44350	2.02396	ILL6	IAA-amino acid hydrolase ILR1-like 6;(source:Araport11)
10 DAS	AT1G17420	1.91256	LOX3	lipoxygenase 3;(source:Araport11)
10 DAS	AT2G23620	1.77505	MES1	methyl esterase 1;(source:Araport11)
10 DAS	AT1G67560	1.60568	LOX6	PLAT/LH2 domain-containing lipoxygenase family protein;(source:Araport11)
10 DAS	AT2G06050	1.57564	OPR3	oxophytodienoate-reductase 3;(source:Araport11)
10 DAS	AT5G63980	1.44718	SAL1	SAL1 phosphatase-like protein;(source:Araport11)
10 DAS	AT5G10300	1.42396	MES5	methyl esterase 5;(source:Araport11)
10 DAS	AT4G16760	1.25631	ACX1	acyl-CoA oxidase 1;(source:Araport11)
10 DAS	AT3G48520	1.25083	CYP94B3	cytochrome P450, family 94, subfamily B, polypeptide 3;(source:Araport11)
10 DAS	AT1G13280	1.10791	AOC4	allene oxide cyclase 4;(source:Araport11)
10 DAS	AT1G76690	1.09545	OPR2	12-oxophytodienoate reductase 2;(source:Araport11)
10 DAS	AT2G33150	0.864286	PKT3	peroxisomal 3-ketoacyl-CoA thiolase 3;(source:Araport11)
10 DAS	AT5G42650	0.810718	AOS	allene oxide synthase;(source:Araport11)
10 DAS	AT4G19045	0.734439	AT4G19045	Mob1/phocein family protein;(source:Araport11)
10 DAS	AT5G45550	0.709961	MOB1-like	Mob1/phocein family protein;(source:Araport11)
10 DAS	AT4G05160	0.65671	AT4G05160	AMP-dependent synthetase and ligase family protein;(source:Araport11)
10 DAS	AT1G61850	0.513946	AT1G61850	phospholipase A I-like protein;(source:Araport11)
10 DAS	AT3G25770	0.470274	AOC2	allene oxide cyclase 2;(source:Araport11)
10 DAS	AT4G29010	0.447664	AIM1	Enoyl-CoA hydratase/isomerase family;(source:Araport11)

## Sheet: ET
Differentially expressed genes (DEGs) assigned to ET with its respective log2(FC), gene symbol and TAIR description. Gene symbol and TAIR description were taken from The Arabidopsis Information Resource (TAIR)
ET: response to ethylene (GO:0009723)
Cluster	geneID	log2(FC)	Gene Symbol	TAIR Description
3 DAS	AT5G40990	5.83686	GLIP1	GDSL lipase 1;(source:Araport11)
3 DAS	AT3G23230	3.52995	TDR1	Integrase-type DNA-binding superfamily protein;(source:Araport11)
3 DAS	AT2G41230	2.45676	ORS1	ORGAN SIZE-like protein;(source:Araport11)
3 DAS	AT1G21320	2.28321	AT1G21320	nucleic acid/nucleotide binding protein;(source:Araport11)
3 DAS	AT1G15520	2.23061	ABCG40	pleiotropic drug resistance 12;(source:Araport11)
3 DAS	AT4G17490	2.15947	ERF6	ethylene responsive element binding factor 6;(source:Araport11)
3 DAS	AT3G15356	2.10873	AT3G15356	Legume lectin family protein;(source:Araport11)
3 DAS	AT1G25220	2.09378	ASB1	anthranilate synthase beta subunit 1;(source:Araport11)
3 DAS	AT5G05730	1.8958	ASA1	anthranilate synthase alpha subunit 1;(source:Araport11)
3 DAS	AT5G47220	1.82685	ERF2	ethylene responsive element binding factor 2;(source:Araport11)
3 DAS	AT5G07690	1.78451	MYB29	myb domain protein 29;(source:Araport11)
3 DAS	AT2G31230	1.77496	ERF15	ethylene-responsive element binding factor 15;(source:Araport11)
3 DAS	AT1G65484	1.76409	AT1G65484	transmembrane protein;(source:Araport11)
3 DAS	AT4G02380	1.64885	SAG21	senescence-associated gene 21;(source:Araport11)
3 DAS	AT1G07135	1.49073	AT1G07135	glycine-rich protein;(source:Araport11)
3 DAS	AT1G29860	1.35745	WRKY71	WRKY DNA-binding protein 71;(source:Araport11)
3 DAS	AT5G10520	1.33824	RBK1	ROP binding protein kinases 1;(source:Araport11)
3 DAS	AT5G64900	1.32165	PROPEP1	precursor of peptide 1;(source:Araport11)
3 DAS	AT5G47230	1.31261	ERF5	ethylene responsive element binding factor 5;(source:Araport11)
3 DAS	AT2G33710	1.24014	AT2G33710	Integrase-type DNA-binding superfamily protein;(source:Araport11)
3 DAS	AT1G59950	1.22861	AT1G59950	NAD(P)-linked oxidoreductase superfamily protein;(source:Araport11)
3 DAS	AT4G11280	1.15869	ACS6	1-aminocyclopropane-1-carboxylic acid (acc) synthase 6;(source:Araport11)
3 DAS	AT5G67080	1.03064	MAPKKK19	mitogen-activated protein kinase kinase kinase 19;(source:Araport11)
3 DAS	AT5G25190	0.930358	ESE3	Integrase-type DNA-binding superfamily protein;(source:Araport11)
3 DAS	AT5G56260	0.868422	AT5G56260	Ribonuclease E inhibitor RraA/Dimethylmenaquinone methyltransferase;(source:Araport11)
3 DAS	AT3G51450	0.816221	AT3G51450	Calcium-dependent phosphotriesterase superfamily protein;(source:Araport11)
3 DAS	AT2G07180	0.780605	AT2G07180	Protein kinase superfamily protein;(source:Araport11)
3 DAS	AT1G28360	0.755938	ERF12	ERF domain protein 12;(source:Araport11)
3 DAS	AT3G23150	0.75552	ETR2	Signal transduction histidine kinase, hybrid-type, ethylene sensor;(source:Araport11)
3 DAS	AT5G57760	0.66355	AT5G57760	hypothetical protein;(source:Araport11)
3 DAS	AT1G17330	0.644313	AT1G17330	Metal-dependent phosphohydrolase;(source:Araport11)
3 DAS	AT3G15210	0.633833	ERF4	ethylene responsive element binding factor 4;(source:Araport11)
3 DAS	AT5G05550	0.592093	AT5G05550	sequence-specific DNA binding transcription factor;(source:Araport11)
3 DAS	AT3G15530	0.585627	AT3G15530	S-adenosyl-L-methionine-dependent methyltransferases superfamily protein;(source:Araport11)
3 DAS	AT4G38495	0.544308	AT4G38495	chromatin-remodeling complex subunit;(source:Araport11)
3 DAS	AT1G78080	0.471877	RAP2.4	related to AP2 4;(source:Araport11)
3 DAS	AT5G53560	0.463668	CB5-E	cytochrome B5 isoform E;(source:Araport11)
3 DAS	AT1G50640	0.453703	ERF3	ethylene responsive element binding factor 3;(source:Araport11)
3 DAS	AT5G25350	0.442839	EBF2	EIN3-binding F box protein 2;(source:Araport11)
3 DAS	AT5G60680	0.420884	AT5G60680	transcription initiation factor TFIID subunit (Protein of unknown function, DUF584);(source:Araport11)
3 DAS	AT1G31930	0.410788	XLG3	extra-large GTP-binding protein 3;(source:Araport11)
6 DAS	AT1G15520	11.2784	ABCG40	pleiotropic drug resistance 12;(source:Araport11)
6 DAS	AT5G40990	9.98384	GLIP1	GDSL lipase 1;(source:Araport11)
6 DAS	AT3G23230	6.75783	TDR1	Integrase-type DNA-binding superfamily protein;(source:Araport11)
6 DAS	AT4G11280	5.55352	ACS6	1-aminocyclopropane-1-carboxylic acid (acc) synthase 6;(source:Araport11)
6 DAS	AT3G23240	5.52468	ERF1	ethylene response factor 1;(source:Araport11)
6 DAS	AT3G15356	5.26625	AT3G15356	Legume lectin family protein;(source:Araport11)
6 DAS	AT1G59950	5.15835	AT1G59950	NAD(P)-linked oxidoreductase superfamily protein;(source:Araport11)
6 DAS	AT4G17490	4.88078	ERF6	ethylene responsive element binding factor 6;(source:Araport11)
6 DAS	AT5G44420	4.66493	PDF1.2	plant defensin 1.2;(source:Araport11)
6 DAS	AT1G29860	4.61809	WRKY71	WRKY DNA-binding protein 71;(source:Araport11)
6 DAS	AT2G41230	4.61704	ORS1	ORGAN SIZE-like protein;(source:Araport11)
6 DAS	AT1G25220	4.55889	ASB1	anthranilate synthase beta subunit 1;(source:Araport11)
6 DAS	AT5G05730	4.55101	ASA1	anthranilate synthase alpha subunit 1;(source:Araport11)
6 DAS	AT1G07135	4.15696	AT1G07135	glycine-rich protein;(source:Araport11)
6 DAS	AT1G70920	4.13939	HB18	homeobox-leucine zipper protein 18;(source:Araport11)
6 DAS	AT2G41225	3.93824	AT2G41225	transmembrane protein;(source:Araport11)
6 DAS	AT1G68765	3.87988	IDA	Putative membrane lipoprotein;(source:Araport11)
6 DAS	AT2G31230	3.75297	ERF15	ethylene-responsive element binding factor 15;(source:Araport11)
6 DAS	AT5G47220	3.52653	ERF2	ethylene responsive element binding factor 2;(source:Araport11)
6 DAS	AT1G04370	3.45955	ERF14	Ethylene-responsive element binding factor 14;(source:Araport11)
6 DAS	AT2G33710	3.44066	AT2G33710	Integrase-type DNA-binding superfamily protein;(source:Araport11)
6 DAS	AT3G04720	3.39997	PR4	pathogenesis-related 4;(source:Araport11)
6 DAS	AT1G06160	3.17159	ORA59	octadecanoid-responsive AP2/ERF 59;(source:Araport11)
6 DAS	AT4G13395	3.15511	RTFL12	ROTUNDIFOLIA like 12;(source:Araport11)
6 DAS	AT2G44840	3.139	ERF13	ethylene-responsive element binding factor 13;(source:Araport11)
6 DAS	AT3G51450	3.11577	AT3G51450	Calcium-dependent phosphotriesterase superfamily protein;(source:Araport11)
6 DAS	AT5G47230	3.04345	ERF5	ethylene responsive element binding factor 5;(source:Araport11)
6 DAS	AT1G18300	2.97806	NUDT4	nudix hydrolase homolog 4;(source:Araport11)
6 DAS	AT1G28370	2.94679	ERF11	ERF domain protein 11;(source:Araport11)
6 DAS	AT3G50480	2.6718	HR4	homolog of RPW8 4;(source:Araport11)
6 DAS	AT2G41640	2.66126	AT2G41640	Glycosyltransferase family 61 protein;(source:Araport11)
6 DAS	AT5G67080	2.61464	MAPKKK19	mitogen-activated protein kinase kinase kinase 19;(source:Araport11)
6 DAS	AT1G21320	2.59479	AT1G21320	nucleic acid/nucleotide binding protein;(source:Araport11)
6 DAS	AT3G48640	2.53519	AT3G48640	transmembrane protein;(source:Araport11)
6 DAS	AT4G29780	2.40387	AT4G29780	nuclease;(source:Araport11)
6 DAS	AT5G64900	2.30444	PROPEP1	precursor of peptide 1;(source:Araport11)
6 DAS	AT5G10520	2.27904	RBK1	ROP binding protein kinases 1;(source:Araport11)
6 DAS	AT2G27310	2.20906	AT2G27310	F-box family protein;(source:Araport11)
6 DAS	AT1G73540	2.19419	NUDT21	nudix hydrolase homolog 21;(source:Araport11)
6 DAS	AT1G03800	2.16604	ERF10	ERF domain protein 10;(source:Araport11)
6 DAS	AT5G42440	2.12743	AT5G42440	Protein kinase superfamily protein;(source:Araport11)
6 DAS	AT2G30550	2.12157	AT2G30550	alpha/beta-Hydrolases superfamily protein;(source:Araport11)
6 DAS	AT1G65484	2.11983	AT1G65484	transmembrane protein;(source:Araport11)
6 DAS	AT5G47740	2.01738	AT5G47740	Adenine nucleotide alpha hydrolases-like superfamily protein;(source:Araport11)
6 DAS	AT3G51430	1.94703	YLS2	Calcium-dependent phosphotriesterase superfamily protein;(source:Araport11)
6 DAS	AT3G57450	1.92167	AT3G57450	hypothetical protein;(source:Araport11)
6 DAS	AT5G13330	1.91624	Rap2.6L	related to AP2 6l;(source:Araport11)
6 DAS	AT5G39610	1.9125	NAC6	NAC domain containing protein 6;(source:Araport11)
6 DAS	AT4G02380	1.8903	SAG21	senescence-associated gene 21;(source:Araport11)
6 DAS	AT3G15210	1.85627	ERF4	ethylene responsive element binding factor 4;(source:Araport11)
6 DAS	AT5G57910	1.80506	AT5G57910	ribosomal RNA small subunit methyltransferase G;(source:Araport11)
6 DAS	AT1G31930	1.79641	XLG3	extra-large GTP-binding protein 3;(source:Araport11)
6 DAS	AT3G59900	1.71569	ARGOS	auxin-regulated gene involved in organ size;(source:Araport11)
6 DAS	AT3G16510	1.67435	AT3G16510	Calcium-dependent lipid-binding (CaLB domain) family protein;(source:Araport11)
6 DAS	AT1G73500	1.66806	MKK9	MAP kinase kinase 9;(source:Araport11)
6 DAS	AT4G28720	1.65241	YUC8	Flavin-binding monooxygenase family protein;(source:Araport11)
6 DAS	AT1G76410	1.62937	ATL8	RING/U-box superfamily protein;(source:Araport11)
6 DAS	AT3G56400	1.60304	WRKY70	WRKY DNA-binding protein 70;(source:Araport11)
6 DAS	AT3G52430	1.57359	PAD4	alpha/beta-Hydrolases superfamily protein;(source:Araport11)
6 DAS	AT2G17705	1.55786	AT2G17705	methionine-S-oxide reductase;(source:Araport11)
6 DAS	AT3G23150	1.53031	ETR2	Signal transduction histidine kinase, hybrid-type, ethylene sensor;(source:Araport11)
6 DAS	AT4G15260	1.51144	AT4G15260	UDP-Glycosyltransferase superfamily protein;(source:Araport11)
6 DAS	AT2G48010	1.50439	RKF3	receptor-like kinase in in flowers 3;(source:Araport11)
6 DAS	AT5G03730	1.45576	CTR1	Protein kinase superfamily protein;(source:Araport11)
6 DAS	AT5G05140	1.44581	AT5G05140	Transcription elongation factor (TFIIS) family protein;(source:Araport11)
6 DAS	AT1G32928	1.41964	AT1G32928	Avr9/Cf-9 rapidly elicited protein;(source:Araport11)
6 DAS	AT1G17330	1.38684	AT1G17330	Metal-dependent phosphohydrolase;(source:Araport11)
6 DAS	AT5G26600	1.24522	AT5G26600	Pyridoxal phosphate (PLP)-dependent transferases superfamily protein;(source:Araport11)
6 DAS	AT1G53170	1.21375	ERF8	ethylene response factor 8;(source:Araport11)
6 DAS	AT1G62380	1.17684	ACO2	ACC oxidase 2;(source:Araport11)
6 DAS	AT1G73730	1.17189	EIL3	ETHYLENE-INSENSITIVE3-like 3;(source:Araport11)
6 DAS	AT4G11300	1.10236	AT4G11300	ROH1, putative (DUF793);(source:Araport11)
6 DAS	AT5G08560	1.09369	AT5G08560	transducin family protein / WD-40 repeat family protein;(source:Araport11)
6 DAS	AT5G62280	1.07846	AT5G62280	DUF1442 family protein (DUF1442);(source:Araport11)
6 DAS	AT5G53560	1.07732	CB5-E	cytochrome B5 isoform E;(source:Araport11)
6 DAS	AT5G22270	1.07341	AT5G22270	hypothetical protein;(source:Araport11)
6 DAS	AT3G45410	1.06071	AT3G45410	Concanavalin A-like lectin protein kinase family protein;(source:Araport11)
6 DAS	AT1G08720	1.04612	EDR1	Protein kinase superfamily protein;(source:Araport11)
6 DAS	AT1G66340	1.03999	ETR1	Signal transduction histidine kinase, hybrid-type, ethylene sensor;(source:Araport11)
6 DAS	AT3G06780	1.03652	AT3G06780	glycine-rich protein;(source:Araport11)
6 DAS	AT3G15530	0.964554	AT3G15530	S-adenosyl-L-methionine-dependent methyltransferases superfamily protein;(source:Araport11)
6 DAS	AT1G72360	0.946383	ERF73	Integrase-type DNA-binding superfamily protein;(source:Araport11)
6 DAS	AT1G64460	0.93306	AT1G64460	phosphatidylinositol 4-kinase gamma-like protein;(source:Araport11)
6 DAS	AT5G64930	0.917804	CPR5	CPR5 protein;(source:Araport11)
6 DAS	AT5G25350	0.896928	EBF2	EIN3-binding F box protein 2;(source:Araport11)
6 DAS	AT4G01960	0.866949	AT4G01960	transmembrane protein;(source:Araport11)
6 DAS	AT3G20770	0.846227	EIN3	Ethylene insensitive 3 family protein;(source:Araport11)
6 DAS	AT4G16110	0.823598	RR2	response regulator 2;(source:Araport11)
6 DAS	AT5G64430	0.815994	AT5G64430	Octicosapeptide/Phox/Bem1p family protein;(source:Araport11)
6 DAS	AT1G01490	0.808144	AT1G01490	Heavy metal transport/detoxification superfamily protein;(source:Araport11)
6 DAS	AT5G59430	0.807494	TRP1	telomeric repeat binding protein 1;(source:Araport11)
6 DAS	AT3G04580	0.807129	EIN4	Signal transduction histidine kinase, hybrid-type, ethylene sensor;(source:Araport11)
6 DAS	AT1G24350	0.801225	AT1G24350	Acid phosphatase/vanadium-dependent haloperoxidase-related protein;(source:Araport11)
6 DAS	AT5G22310	0.772438	AT5G22310	trichohyalin-like protein;(source:Araport11)
6 DAS	AT5G02320	0.724082	MYB3R-5	myb domain protein 3r-5;(source:Araport11)
6 DAS	AT2G26070	0.714707	RTE1	protein REVERSION-TO-ETHYLENE SENSITIVITY-like protein (DUF778);(source:Araport11)
6 DAS	AT2G40940	0.714392	ERS1	ethylene response sensor 1;(source:Araport11)
6 DAS	AT2G21150	0.706801	XCT	XAP5 family protein;(source:Araport11)
6 DAS	AT4G32020	0.703898	AT4G32020	serine/arginine repetitive matrix-like protein;(source:Araport11)
6 DAS	AT5G59540	0.685565	AT5G59540	2-oxoglutarate (2OG) and Fe(II)-dependent oxygenase superfamily protein;(source:Araport11)
6 DAS	AT1G27100	0.681053	AT1G27100	Actin cross-linking protein;(source:Araport11)
6 DAS	AT3G54100	0.66564	AT3G54100	O-fucosyltransferase family protein;(source:Araport11)
6 DAS	AT5G18630	0.66289	AT5G18630	alpha/beta-Hydrolases superfamily protein;(source:Araport11)
6 DAS	AT5G44790	0.651582	RAN1	copper-exporting ATPase / responsive-to-antagonist 1 / copper-transporting ATPase (RAN1);(source:Araport11)
6 DAS	AT5G24520	0.649513	TTG1	Transducin/WD40 repeat-like superfamily protein;(source:Araport11)
6 DAS	AT1G58180	0.581359	BCA6	beta carbonic anhydrase 6;(source:Araport11)
6 DAS	AT2G19560	0.576536	EER5	proteasome family protein;(source:Araport11)
6 DAS	AT1G50640	0.571108	ERF3	ethylene responsive element binding factor 3;(source:Araport11)
6 DAS	AT2G15695	0.557318	AT2G15695	peptide methionine sulfoxide reductase (Protein of unknown function DUF829, transmembrane 53);(source:Araport11)
6 DAS	AT3G11100	0.544084	AT3G11100	sequence-specific DNA binding transcription factor;(source:Araport11)
6 DAS	AT1G17440	0.536497	EER4	Transcription initiation factor TFIID subunit A;(source:Araport11)
6 DAS	AT5G20730	0.535791	NPH4	Transcriptional factor B3 family protein / auxin-responsive factor AUX/IAA-like protein;(source:Araport11)
6 DAS	AT2G07180	0.511459	AT2G07180	Protein kinase superfamily protein;(source:Araport11)
6 DAS	AT4G20380	0.493489	LSD1	LSD1 zinc finger family protein;(source:Araport11)
6 DAS	AT1G28320	0.478364	DEG15	protease-like protein;(source:Araport11)
6 DAS	AT4G11860	0.472499	AT4G11860	FAM63A-like protein (DUF544);(source:Araport11)
6 DAS	AT3G51550	0.417342	FER	Malectin/receptor-like protein kinase family protein;(source:Araport11)
6 DAS	AT4G34460	0.368236	AGB1	GTP binding protein beta 1;(source:Araport11)
10 DAS	AT1G15520	5.80837	ABCG40	pleiotropic drug resistance 12;(source:Araport11)
10 DAS	AT1G59950	4.23426	AT1G59950	NAD(P)-linked oxidoreductase superfamily protein;(source:Araport11)
10 DAS	AT3G15356	3.73756	AT3G15356	Legume lectin family protein;(source:Araport11)
10 DAS	AT5G40990	3.53949	GLIP1	GDSL lipase 1;(source:Araport11)
10 DAS	AT3G23240	3.51964	ERF1	ethylene response factor 1;(source:Araport11)
10 DAS	AT5G67080	3.19626	MAPKKK19	mitogen-activated protein kinase kinase kinase 19;(source:Araport11)
10 DAS	AT3G23230	3.16506	TDR1	Integrase-type DNA-binding superfamily protein;(source:Araport11)
10 DAS	AT3G04720	3.1632	PR4	pathogenesis-related 4;(source:Araport11)
10 DAS	AT5G05730	3.12498	ASA1	anthranilate synthase alpha subunit 1;(source:Araport11)
10 DAS	AT4G11280	3.0945	ACS6	1-aminocyclopropane-1-carboxylic acid (acc) synthase 6;(source:Araport11)
10 DAS	AT4G17490	3.08436	ERF6	ethylene responsive element binding factor 6;(source:Araport11)
10 DAS	AT1G06160	2.98906	ORA59	octadecanoid-responsive AP2/ERF 59;(source:Araport11)
10 DAS	AT1G25220	2.94741	ASB1	anthranilate synthase beta subunit 1;(source:Araport11)
10 DAS	AT1G29860	2.7797	WRKY71	WRKY DNA-binding protein 71;(source:Araport11)
10 DAS	AT2G41230	2.77052	ORS1	ORGAN SIZE-like protein;(source:Araport11)
10 DAS	AT3G51450	2.70974	AT3G51450	Calcium-dependent phosphotriesterase superfamily protein;(source:Araport11)
10 DAS	AT3G12500	2.66732	HCHIB	basic chitinase;(source:Araport11)
10 DAS	AT1G07135	2.53533	AT1G07135	glycine-rich protein;(source:Araport11)
10 DAS	AT1G56160	2.51178	MYB72	myb domain protein 72;(source:Araport11)
10 DAS	AT2G30550	2.49725	AT2G30550	alpha/beta-Hydrolases superfamily protein;(source:Araport11)
10 DAS	AT2G31230	2.2885	ERF15	ethylene-responsive element binding factor 15;(source:Araport11)
10 DAS	AT4G02380	2.19054	SAG21	senescence-associated gene 21;(source:Araport11)
10 DAS	AT5G44420	2.18635	PDF1.2	plant defensin 1.2;(source:Araport11)
10 DAS	AT5G57910	1.99288	AT5G57910	ribosomal RNA small subunit methyltransferase G;(source:Araport11)
10 DAS	AT1G28370	1.96561	ERF11	ERF domain protein 11;(source:Araport11)
10 DAS	AT2G44840	1.90973	ERF13	ethylene-responsive element binding factor 13;(source:Araport11)
10 DAS	AT5G47220	1.90351	ERF2	ethylene responsive element binding factor 2;(source:Araport11)
10 DAS	AT1G73500	1.82857	MKK9	MAP kinase kinase 9;(source:Araport11)
10 DAS	AT1G23320	1.80861	TAR1	tryptophan aminotransferase related 1;(source:Araport11)
10 DAS	AT3G56400	1.77613	WRKY70	WRKY DNA-binding protein 70;(source:Araport11)
10 DAS	AT3G51430	1.77178	YLS2	Calcium-dependent phosphotriesterase superfamily protein;(source:Araport11)
10 DAS	AT3G48640	1.67356	AT3G48640	transmembrane protein;(source:Araport11)
10 DAS	AT3G50480	1.66701	HR4	homolog of RPW8 4;(source:Araport11)
10 DAS	AT1G03800	1.65663	ERF10	ERF domain protein 10;(source:Araport11)
10 DAS	AT2G33710	1.64755	AT2G33710	Integrase-type DNA-binding superfamily protein;(source:Araport11)
10 DAS	AT5G64900	1.5201	PROPEP1	precursor of peptide 1;(source:Araport11)
10 DAS	AT1G21320	1.43273	AT1G21320	nucleic acid/nucleotide binding protein;(source:Araport11)
10 DAS	AT1G68765	1.41621	IDA	Putative membrane lipoprotein;(source:Araport11)
10 DAS	AT3G52430	1.40191	PAD4	alpha/beta-Hydrolases superfamily protein;(source:Araport11)
10 DAS	AT2G27310	1.39953	AT2G27310	F-box family protein;(source:Araport11)
10 DAS	AT4G13395	1.38865	RTFL12	ROTUNDIFOLIA like 12;(source:Araport11)
10 DAS	AT4G29780	1.3827	AT4G29780	nuclease;(source:Araport11)
10 DAS	AT5G47740	1.37145	AT5G47740	Adenine nucleotide alpha hydrolases-like superfamily protein;(source:Araport11)
10 DAS	AT1G04990	1.36908	AT1G04990	Zinc finger C-x8-C-x5-C-x3-H type family protein;(source:Araport11)
10 DAS	AT2G15830	1.36279	AT2G15830	hypothetical protein;(source:Araport11)
10 DAS	AT3G12820	1.30402	MYB10	myb domain protein 10;(source:Araport11)
10 DAS	AT1G73540	1.29302	NUDT21	nudix hydrolase homolog 21;(source:Araport11)
10 DAS	AT5G13330	1.2168	Rap2.6L	related to AP2 6l;(source:Araport11)
10 DAS	AT3G16510	1.21434	AT3G16510	Calcium-dependent lipid-binding (CaLB domain) family protein;(source:Araport11)
10 DAS	AT5G10520	1.20234	RBK1	ROP binding protein kinases 1;(source:Araport11)
10 DAS	AT3G57450	1.20005	AT3G57450	hypothetical protein;(source:Araport11)
10 DAS	AT5G39610	1.17708	NAC6	NAC domain containing protein 6;(source:Araport11)
10 DAS	AT4G27652	1.1666	AT4G27652	hypothetical protein;(source:Araport11)
10 DAS	AT2G40820	1.15511	AT2G40820	stomatal closure actin-binding-like protein;(source:Araport11)
10 DAS	AT5G22270	1.14777	AT5G22270	hypothetical protein;(source:Araport11)
10 DAS	AT1G18300	1.11257	NUDT4	nudix hydrolase homolog 4;(source:Araport11)
10 DAS	AT5G25190	1.07189	ESE3	Integrase-type DNA-binding superfamily protein;(source:Araport11)
10 DAS	AT3G15210	1.04706	ERF4	ethylene responsive element binding factor 4;(source:Araport11)
10 DAS	AT1G64460	1.03477	AT1G64460	phosphatidylinositol 4-kinase gamma-like protein;(source:Araport11)
10 DAS	AT3G51440	1.02776	AT3G51440	Calcium-dependent phosphotriesterase superfamily protein;(source:Araport11)
10 DAS	AT5G10720	0.962698	HK5	histidine kinase 5;(source:Araport11)
10 DAS	AT5G03730	0.939069	CTR1	Protein kinase superfamily protein;(source:Araport11)
10 DAS	AT1G72360	0.934014	ERF73	Integrase-type DNA-binding superfamily protein;(source:Araport11)
10 DAS	AT1G31930	0.93186	XLG3	extra-large GTP-binding protein 3;(source:Araport11)
10 DAS	AT2G40750	0.90936	WRKY54	WRKY DNA-binding protein 54;(source:Araport11)
10 DAS	AT2G17705	0.887117	AT2G17705	methionine-S-oxide reductase;(source:Araport11)
10 DAS	AT1G53170	0.88479	ERF8	ethylene response factor 8;(source:Araport11)
10 DAS	AT2G41640	0.872366	AT2G41640	Glycosyltransferase family 61 protein;(source:Araport11)
10 DAS	AT3G06780	0.838542	AT3G06780	glycine-rich protein;(source:Araport11)
10 DAS	AT3G62680	0.831223	PRP3	proline-rich protein 3;(source:Araport11)
10 DAS	AT2G28570	0.830031	AT2G28570	hypothetical protein;(source:Araport11)
10 DAS	AT1G24350	0.818587	AT1G24350	Acid phosphatase/vanadium-dependent haloperoxidase-related protein;(source:Araport11)
10 DAS	AT1G17330	0.801524	AT1G17330	Metal-dependent phosphohydrolase;(source:Araport11)
10 DAS	AT5G26600	0.785268	AT5G26600	Pyridoxal phosphate (PLP)-dependent transferases superfamily protein;(source:Araport11)
10 DAS	AT5G47230	0.761019	ERF5	ethylene responsive element binding factor 5;(source:Araport11)
10 DAS	AT2G46490	0.745022	AT2G46490	hypothetical protein;(source:Araport11)
10 DAS	AT5G17490	0.740694	RGL3	RGA-like protein 3;(source:Araport11)
10 DAS	AT5G53560	0.727144	CB5-E	cytochrome B5 isoform E;(source:Araport11)
10 DAS	AT4G11300	0.726351	AT4G11300	ROH1, putative (DUF793);(source:Araport11)
10 DAS	AT1G01490	0.723814	AT1G01490	Heavy metal transport/detoxification superfamily protein;(source:Araport11)
10 DAS	AT4G11860	0.666061	AT4G11860	FAM63A-like protein (DUF544);(source:Araport11)
10 DAS	AT5G42440	0.655769	AT5G42440	Protein kinase superfamily protein;(source:Araport11)
10 DAS	AT3G05420	0.647793	ACBP4	acyl-CoA binding protein 4;(source:Araport11)
10 DAS	AT1G66350	0.628019	RGL1	RGA-like 1;(source:Araport11)
10 DAS	AT5G05140	0.626396	AT5G05140	Transcription elongation factor (TFIIS) family protein;(source:Araport11)
10 DAS	AT5G56260	0.608128	AT5G56260	Ribonuclease E inhibitor RraA/Dimethylmenaquinone methyltransferase;(source:Araport11)
10 DAS	AT3G15530	0.606319	AT3G15530	S-adenosyl-L-methionine-dependent methyltransferases superfamily protein;(source:Araport11)
10 DAS	AT2G40940	0.606285	ERS1	ethylene response sensor 1;(source:Araport11)
10 DAS	AT4G15260	0.605692	AT4G15260	UDP-Glycosyltransferase superfamily protein;(source:Araport11)
10 DAS	AT4G01960	0.593499	AT4G01960	transmembrane protein;(source:Araport11)
10 DAS	AT5G57760	0.589017	AT5G57760	hypothetical protein;(source:Araport11)
10 DAS	AT5G64430	0.582756	AT5G64430	Octicosapeptide/Phox/Bem1p family protein;(source:Araport11)
10 DAS	AT2G48010	0.560323	RKF3	receptor-like kinase in in flowers 3;(source:Araport11)
10 DAS	AT3G60260	0.539589	AT3G60260	ELMO/CED-12 family protein;(source:Araport11)
10 DAS	AT1G08720	0.532672	EDR1	Protein kinase superfamily protein;(source:Araport11)
10 DAS	AT1G64060	0.518549	RBOH F	respiratory burst oxidase protein F;(source:Araport11)
10 DAS	AT5G64550	0.505789	AT5G64550	loricrin-like protein;(source:Araport11)
10 DAS	AT2G07180	0.501923	AT2G07180	Protein kinase superfamily protein;(source:Araport11)
10 DAS	AT5G08560	0.483496	AT5G08560	transducin family protein / WD-40 repeat family protein;(source:Araport11)
10 DAS	AT3G54100	0.445517	AT3G54100	O-fucosyltransferase family protein;(source:Araport11)
10 DAS	AT1G73730	0.44469	EIL3	ETHYLENE-INSENSITIVE3-like 3;(source:Araport11)
10 DAS	AT1G13960	0.438941	WRKY4	WRKY DNA-binding protein 4;(source:Araport11)
10 DAS	AT5G44790	0.407885	RAN1	copper-exporting ATPase / responsive-to-antagonist 1 / copper-transporting ATPase (RAN1);(source:Araport11)
10 DAS	AT4G32020	0.333448	AT4G32020	serine/arginine repetitive matrix-like protein;(source:Araport11)
10 DAS	AT4G32040	0.296429	KNAT5	homeobox protein knotted-1-like 5;(source:Araport11)

## Sheet: SA
Differentially expressed genes (DEGs assigned to SA with its respective log2(FC), gene symbol and TAIR description. Gene symbol and TAIR description were taken from The Arabidopsis Information Resource (TAIR)
SA: response to salicylic acid (GO:0009751)
Cluster	geneID	log2(FC)	Gene Symbol	TAIR Description
3 DAS	AT1G66700	6.24682	PXMT1	S-adenosyl-L-methionine-dependent methyltransferases superfamily protein;(source:Araport11)
3 DAS	AT5G40990	5.83686	GLIP1	GDSL lipase 1;(source:Araport11)
3 DAS	AT1G56250	5.55305	PP2-B14	phloem protein 2-B14;(source:Araport11)
3 DAS	AT1G56240	5.26766	PP2-B13	phloem protein 2-B13;(source:Araport11)
3 DAS	AT1G79680	5.2045	WAKL10	WALL ASSOCIATED KINASE (WAK)-LIKE 10;(source:Araport11)
3 DAS	AT1G26420	4.77748	AT1G26420	FAD-binding Berberine family protein;(source:Araport11)
3 DAS	AT5G24110	4.4759	WRKY30	WRKY DNA-binding protein 30;(source:Araport11)
3 DAS	AT4G23280	4.38742	CRK20	cysteine-rich RLK (RECEPTOR-like protein kinase) 20;(source:Araport11)
3 DAS	AT4G22030	3.93416	AT4G22030	F-box protein with a domain protein;(source:Araport11)
3 DAS	AT5G65600	3.61539	AT5G65600	Concanavalin A-like lectin protein kinase family protein;(source:Araport11)
3 DAS	AT5G36970	3.56463	NHL25	NDR1/HIN1-like 25;(source:Araport11)
3 DAS	AT5G57010	3.0984	AT5G57010	calmodulin-binding family protein;(source:Araport11)
3 DAS	AT1G51920	3.04227	AT1G51920	transmembrane protein;(source:Araport11)
3 DAS	AT1G53625	3.02855	AT1G53625	hypothetical protein;(source:Araport11)
3 DAS	AT3G26230	2.98298	CYP71B24	cytochrome P450, family 71, subfamily B, polypeptide 24;(source:Araport11)
3 DAS	AT5G22520	2.7264	AT5G22520	hypothetical protein;(source:Araport11)
3 DAS	AT4G12500	2.68462	AT4G12500	Bifunctional inhibitor/lipid-transfer protein/seed storage 2S albumin superfamily protein;(source:Araport11)
3 DAS	AT5G52750	2.52872	AT5G52750	Heavy metal transport/detoxification superfamily protein;(source:Araport11)
3 DAS	AT1G06137	2.52473	AT1G06137	transmembrane protein;(source:Araport11)
3 DAS	AT3G18250	2.50831	AT3G18250	Putative membrane lipoprotein;(source:Araport11)
3 DAS	AT4G11070	2.45437	WRKY41	WRKY family transcription factor;(source:Araport11)
3 DAS	AT4G26120	2.42054	AT4G26120	Ankyrin repeat family protein / BTB/POZ domain-containing protein;(source:Araport11)
3 DAS	AT4G21903	2.34563	AT4G21903	MATE efflux family protein;(source:Araport11)
3 DAS	AT5G41750	2.31194	AT5G41750	Disease resistance protein (TIR-NBS-LRR class) family;(source:Araport11)
3 DAS	AT4G14450	2.30549	AT4G14450	hypothetical protein;(source:Araport11)
3 DAS	AT1G15520	2.23061	ABCG40	pleiotropic drug resistance 12;(source:Araport11)
3 DAS	AT1G36622	2.19871	AT1G36622	transmembrane protein;(source:Araport11)
3 DAS	AT4G23810	2.06725	WRKY53	WRKY family transcription factor;(source:Araport11)
3 DAS	AT2G29720	2.06577	CTF2B	FAD/NAD(P)-binding oxidoreductase family protein;(source:Araport11)
3 DAS	AT3G02800	2.03449	PFA-DSP3	Tyrosine phosphatase family protein;(source:Araport11)
3 DAS	AT1G13520	2.00315	AT1G13520	hypothetical protein (DUF1262);(source:Araport11)
3 DAS	AT2G25735	1.95897	AT2G25735	hypothetical protein;(source:Araport11)
3 DAS	AT1G07620	1.93381	ATOBGM	GTP-binding protein Obg/CgtA;(source:Araport11)
3 DAS	AT4G11521	1.83164	AT4G11521	Receptor-like protein kinase-related family protein;(source:Araport11)
3 DAS	AT1G80840	1.83056	WRKY40	WRKY DNA-binding protein 40;(source:Araport11)
3 DAS	AT5G47850	1.79939	CCR4	CRINKLY4 related 4;(source:Araport11)
3 DAS	AT4G35180	1.77221	LHT7	LYS/HIS transporter 7;(source:Araport11)
3 DAS	AT5G46295	1.76965	AT5G46295	transmembrane protein;(source:Araport11)
3 DAS	AT1G30755	1.76457	AT1G30755	elongation factor G, putative (DUF668);(source:Araport11)
3 DAS	AT1G65484	1.76409	AT1G65484	transmembrane protein;(source:Araport11)
3 DAS	AT5G38310	1.76085	AT5G38310	hypothetical protein;(source:Araport11)
3 DAS	AT5G23510	1.75899	AT5G23510	hypothetical protein;(source:Araport11)
3 DAS	AT1G03220	1.66384	AT1G03220	Eukaryotic aspartyl protease family protein;(source:Araport11)
3 DAS	AT5G42830	1.60392	AT5G42830	HXXXD-type acyl-transferase family protein;(source:Araport11)
3 DAS	AT4G28703	1.55861	AT4G28703	RmlC-like cupins superfamily protein;(source:Araport11)
3 DAS	AT3G29000	1.5546	AT3G29000	Calcium-binding EF-hand family protein;(source:Araport11)
3 DAS	AT2G42980	1.54928	AT2G42980	Eukaryotic aspartyl protease family protein;(source:Araport11)
3 DAS	AT1G67920	1.51049	AT1G67920	hypothetical protein;(source:Araport11)
3 DAS	AT1G07135	1.49073	AT1G07135	glycine-rich protein;(source:Araport11)
3 DAS	AT1G55450	1.48542	AT1G55450	S-adenosyl-L-methionine-dependent methyltransferases superfamily protein;(source:Araport11)
3 DAS	AT4G23170	1.47929	EP1	receptor-like protein kinase-related family protein;(source:Araport11)
3 DAS	AT4G14365	1.4625	XBAT34	hypothetical protein;(source:Araport11)
3 DAS	AT3G13433	1.46229	AT3G13433	transmembrane protein;(source:Araport11)
3 DAS	AT2G46430	1.42015	CNGC3	cyclic nucleotide gated channel 3;(source:Araport11)
3 DAS	AT5G44568	1.39489	AT5G44568	transmembrane protein;(source:Araport11)
3 DAS	AT1G66880	1.34268	AT1G66880	Protein kinase superfamily protein;(source:Araport11)
3 DAS	AT3G59080	1.33308	AT3G59080	Eukaryotic aspartyl protease family protein;(source:Araport11)
3 DAS	AT5G54710	1.31673	AT5G54710	Ankyrin repeat family protein;(source:Araport11)
3 DAS	AT5G41740	1.18332	AT5G41740	Disease resistance protein (TIR-NBS-LRR class) family;(source:Araport11)
3 DAS	AT4G11000	1.16092	AT4G11000	Ankyrin repeat family protein;(source:Araport11)
3 DAS	AT4G23220	1.13426	CRK14	cysteine-rich RECEPTOR-like kinase;(source:Araport11)
3 DAS	AT5G57550	1.08569	XTH25	xyloglucan endotransglucosylase/hydrolase 25;(source:Araport11)
3 DAS	AT5G67080	1.03064	MAPKKK19	mitogen-activated protein kinase kinase kinase 19;(source:Araport11)
3 DAS	AT4G36500	1.01761	AT4G36500	hypothetical protein;(source:Araport11)
3 DAS	AT2G40000	0.982867	HSPRO2	ortholog of sugar beet HS1 PRO-1 2;(source:Araport11)
3 DAS	AT3G26910	0.961916	AT3G26910	hydroxyproline-rich glycoprotein family protein;(source:Araport11)
3 DAS	AT4G22780	0.960389	ACR7	ACT domain repeat 7;(source:Araport11)
3 DAS	AT1G64610	0.942679	AT1G64610	Transducin/WD40 repeat-like superfamily protein;(source:Araport11)
3 DAS	AT5G04760	0.936637	AT5G04760	Duplicated homeodomain-like superfamily protein;(source:Araport11)
3 DAS	AT4G25900	0.927114	AT4G25900	Galactose mutarotase-like superfamily protein;(source:Araport11)
3 DAS	AT1G76930	0.924431	EXT4	extensin 4;(source:Araport11)
3 DAS	AT3G55470	0.918919	AT3G55470	Calcium-dependent lipid-binding (CaLB domain) family protein;(source:Araport11)
3 DAS	AT4G39580	0.915673	AT4G39580	Galactose oxidase/kelch repeat superfamily protein;(source:Araport11)
3 DAS	AT1G72940	0.898368	AT1G72940	Toll-Interleukin-Resistance (TIR) domain-containing protein;(source:Araport11)
3 DAS	AT3G51340	0.881447	AT3G51340	Eukaryotic aspartyl protease family protein;(source:Araport11)
3 DAS	AT5G35735	0.878825	AT5G35735	Auxin-responsive family protein;(source:Araport11)
3 DAS	AT5G19240	0.835213	AT5G19240	Glycoprotein membrane precursor GPI-anchored;(source:Araport11)
3 DAS	AT3G51450	0.816221	AT3G51450	Calcium-dependent phosphotriesterase superfamily protein;(source:Araport11)
3 DAS	AT1G44830	0.750954	AT1G44830	Integrase-type DNA-binding superfamily protein;(source:Araport11)
3 DAS	AT5G25930	0.717043	AT5G25930	kinase family with leucine-rich repeat domain-containing protein;(source:Araport11)
3 DAS	AT3G11820	0.707898	SYP121	syntaxin of plants 121;(source:Araport11)
3 DAS	AT5G41100	0.704408	AT5G41100	hydroxyproline-rich glycoprotein family protein;(source:Araport11)
3 DAS	AT1G08940	0.70217	AT1G08940	Phosphoglycerate mutase family protein;(source:Araport11)
3 DAS	AT1G61260	0.633427	AT1G61260	cotton fiber (DUF761);(source:Araport11)
3 DAS	AT5G57035	0.630711	AT5G57035	U-box domain-containing protein kinase family protein;(source:Araport11)
3 DAS	AT5G26980	0.610836	SYP41	syntaxin of plants 41;(source:Araport11)
3 DAS	AT2G06010	0.562062	ORG4	OBP3-responsive protein 4 (ORG4);(source:Araport11)
3 DAS	AT5G02290	0.534779	NAK	Protein kinase superfamily protein;(source:Araport11)
3 DAS	AT3G08760	0.52491	ATSIK	Protein kinase superfamily protein;(source:Araport11)
3 DAS	AT4G23030	0.503252	AT4G23030	MATE efflux family protein;(source:Araport11)
3 DAS	AT4G16500	0.490313	AT4G16500	Cystatin/monellin superfamily protein;(source:Araport11)
3 DAS	AT2G34690	0.478476	ACD11	Glycolipid transfer protein (GLTP) family protein;(source:Araport11)
6 DAS	AT1G15520	11.2784	ABCG40	pleiotropic drug resistance 12;(source:Araport11)
6 DAS	AT1G79680	1.01637	WAKL10	WALL ASSOCIATED KINASE (WAK)-LIKE 10;(source:Araport11)
6 DAS	AT5G40990	-0.67377	GLIP1	GDSL lipase 1;(source:Araport11)
6 DAS	AT4G22030	-0.598149	AT4G22030	F-box protein with a domain protein;(source:Araport11)
6 DAS	AT1G66700	3.06986	PXMT1	S-adenosyl-L-methionine-dependent methyltransferases superfamily protein;(source:Araport11)
6 DAS	AT5G36970	-0.763593	NHL25	NDR1/HIN1-like 25;(source:Araport11)
6 DAS	AT1G56250	1.31268	PP2-B14	phloem protein 2-B14;(source:Araport11)
6 DAS	AT3G13433	2.60511	AT3G13433	transmembrane protein;(source:Araport11)
6 DAS	AT1G06137	-0.957786	AT1G06137	transmembrane protein;(source:Araport11)
6 DAS	AT5G24110	-0.957923	WRKY30	WRKY DNA-binding protein 30;(source:Araport11)
6 DAS	AT5G65600	1.21612	AT5G65600	Concanavalin A-like lectin protein kinase family protein;(source:Araport11)
6 DAS	AT1G51920	-0.801636	AT1G51920	transmembrane protein;(source:Araport11)
6 DAS	AT1G53625	2.81811	AT1G53625	hypothetical protein;(source:Araport11)
6 DAS	AT2G44070	0.545486	AT2G44070	NagB/RpiA/CoA transferase-like superfamily protein;(source:Araport11)
6 DAS	AT5G47850	-0.72697	CCR4	CRINKLY4 related 4;(source:Araport11)
6 DAS	AT4G03450	2.89128	AT4G03450	Ankyrin repeat family protein;(source:Araport11)
6 DAS	AT1G56240	-3.4454	PP2-B13	phloem protein 2-B13;(source:Araport11)
6 DAS	AT1G26420	1.09006	AT1G26420	FAD-binding Berberine family protein;(source:Araport11)
6 DAS	AT1G21240	-1.20656	WAK3	wall associated kinase 3;(source:Araport11)
6 DAS	AT2G04495	0.77411	AT2G04495	transmembrane protein;(source:Araport11)
6 DAS	AT5G41750	0.874584	AT5G41750	Disease resistance protein (TIR-NBS-LRR class) family;(source:Araport11)
6 DAS	AT1G36622	-2.45441	AT1G36622	transmembrane protein;(source:Araport11)
6 DAS	AT3G29000	2.75553	AT3G29000	Calcium-binding EF-hand family protein;(source:Araport11)
6 DAS	AT4G23280	-0.716392	CRK20	cysteine-rich RLK (RECEPTOR-like protein kinase) 20;(source:Araport11)
6 DAS	AT3G18250	-1.10696	AT3G18250	Putative membrane lipoprotein;(source:Araport11)
6 DAS	AT5G52750	1.07732	AT5G52750	Heavy metal transport/detoxification superfamily protein;(source:Araport11)
6 DAS	AT4G14365	0.827206	XBAT34	hypothetical protein;(source:Araport11)
6 DAS	AT1G13520	-0.767475	AT1G13520	hypothetical protein (DUF1262);(source:Araport11)
6 DAS	AT3G26230	0.425386	CYP71B24	cytochrome P450, family 71, subfamily B, polypeptide 24;(source:Araport11)
6 DAS	AT4G14450	0.775614	AT4G14450	hypothetical protein;(source:Araport11)
6 DAS	AT3G50930	-0.801736	BCS1	cytochrome BC1 synthesi;(source:Araport11)
6 DAS	AT1G21250	1.90551	WAK1	cell wall-associated kinase;(source:Araport11)
6 DAS	AT2G32140	-1.14538	AT2G32140	transmembrane receptor;(source:Araport11)
6 DAS	AT3G25240	9.71911	AT3G25240	sulfate/thiosulfate import ATP-binding protein, putative (DUF506);(source:Araport11)
6 DAS	AT2G18690	-0.986745	AT2G18690	transmembrane protein;(source:Araport11)
6 DAS	AT1G07620	0.789768	ATOBGM	GTP-binding protein Obg/CgtA;(source:Araport11)
6 DAS	AT5G60900	0.536323	RLK1	receptor-like protein kinase 1;(source:Araport11)
6 DAS	AT3G47090	1.0754	AT3G47090	Leucine-rich repeat protein kinase family protein;(source:Araport11)
6 DAS	AT4G12500	2.79324	AT4G12500	Bifunctional inhibitor/lipid-transfer protein/seed storage 2S albumin superfamily protein;(source:Araport11)
6 DAS	AT4G11070	-2.23078	WRKY41	WRKY family transcription factor;(source:Araport11)
6 DAS	AT4G21840	2.74806	MSRB8	methionine sulfoxide reductase B8;(source:Araport11)
6 DAS	AT2G46400	0.603581	WRKY46	WRKY DNA-binding protein 46;(source:Araport11)
6 DAS	AT5G41740	-0.880983	AT5G41740	Disease resistance protein (TIR-NBS-LRR class) family;(source:Araport11)
6 DAS	AT2G01300	2.6862	AT2G01300	mediator of RNA polymerase II transcription subunit;(source:Araport11)
6 DAS	AT5G57010	2.68426	AT5G57010	calmodulin-binding family protein;(source:Araport11)
6 DAS	AT1G07135	-0.671069	AT1G07135	glycine-rich protein;(source:Araport11)
6 DAS	AT2G14560	1.96457	LURP1	LURP-one-like protein (DUF567);(source:Araport11)
6 DAS	AT5G42830	1.39616	AT5G42830	HXXXD-type acyl-transferase family protein;(source:Araport11)
6 DAS	AT4G23220	-1.5926	CRK14	cysteine-rich RECEPTOR-like kinase;(source:Araport11)
6 DAS	AT3G13950	-1.18204	AT3G13950	ankyrin;(source:Araport11)
6 DAS	AT2G42980	-0.71789	AT2G42980	Eukaryotic aspartyl protease family protein;(source:Araport11)
6 DAS	AT4G26120	-0.433692	AT4G26120	Ankyrin repeat family protein / BTB/POZ domain-containing protein;(source:Araport11)
6 DAS	AT1G68620	0.842964	AT1G68620	alpha/beta-Hydrolases superfamily protein;(source:Araport11)
6 DAS	AT5G38310	-0.842366	AT5G38310	hypothetical protein;(source:Araport11)
6 DAS	AT5G25930	-1.49598	AT5G25930	kinase family with leucine-rich repeat domain-containing protein;(source:Araport11)
6 DAS	AT4G11521	-2.43784	AT4G11521	Receptor-like protein kinase-related family protein;(source:Araport11)
6 DAS	AT3G61190	-1.43964	BAP1	BON association protein 1;(source:Araport11)
6 DAS	AT2G25460	-1.96849	AT2G25460	EEIG1/EHBP1 protein amino-terminal domain protein;(source:Araport11)
6 DAS	AT4G35180	1.38522	LHT7	LYS/HIS transporter 7;(source:Araport11)
6 DAS	AT3G55840	-0.602425	AT3G55840	Hs1pro-1 protein;(source:Araport11)
6 DAS	AT4G39580	0.970523	AT4G39580	Galactose oxidase/kelch repeat superfamily protein;(source:Araport11)
6 DAS	AT1G76930	-0.9688	EXT4	extensin 4;(source:Araport11)
6 DAS	AT3G02800	-0.43368	PFA-DSP3	Tyrosine phosphatase family protein;(source:Araport11)
6 DAS	AT3G52400	-1.70092	SYP122	syntaxin of plants 122;(source:Araport11)
6 DAS	AT1G66880	-0.942436	AT1G66880	Protein kinase superfamily protein;(source:Araport11)
6 DAS	AT1G08940	-0.822707	AT1G08940	Phosphoglycerate mutase family protein;(source:Araport11)
6 DAS	AT4G23610	0.813025	AT4G23610	Late embryogenesis abundant (LEA) hydroxyproline-rich glycoprotein family;(source:Araport11)
6 DAS	AT1G80840	0.63519	WRKY40	WRKY DNA-binding protein 40;(source:Araport11)
6 DAS	AT1G03220	1.43068	AT1G03220	Eukaryotic aspartyl protease family protein;(source:Araport11)
6 DAS	AT4G23030	0.748374	AT4G23030	MATE efflux family protein;(source:Araport11)
6 DAS	AT2G29720	-0.982372	CTF2B	FAD/NAD(P)-binding oxidoreductase family protein;(source:Araport11)
6 DAS	AT1G61340	0.471132	FBS1	F-box family protein;(source:Araport11)
6 DAS	AT5G22520	-1.83761	AT5G22520	hypothetical protein;(source:Araport11)
6 DAS	AT1G10040	1.91319	AT1G10040	alpha/beta-Hydrolases superfamily protein;(source:Araport11)
6 DAS	AT5G46080	-0.72697	AT5G46080	Protein kinase superfamily protein;(source:Araport11)
6 DAS	AT3G51450	-1.11131	AT3G51450	Calcium-dependent phosphotriesterase superfamily protein;(source:Araport11)
6 DAS	AT3G55470	1.64691	AT3G55470	Calcium-dependent lipid-binding (CaLB domain) family protein;(source:Araport11)
6 DAS	AT5G46295	-0.717936	AT5G46295	transmembrane protein;(source:Araport11)
6 DAS	AT3G59080	-1.42356	AT3G59080	Eukaryotic aspartyl protease family protein;(source:Araport11)
6 DAS	AT5G06320	-0.731607	NHL3	NDR1/HIN1-like 3;(source:Araport11)
6 DAS	AT2G04515	-1.72824	AT2G04515	transmembrane protein;(source:Araport11)
6 DAS	AT5G17760	-0.999682	AT5G17760	P-loop containing nucleoside triphosphate hydrolases superfamily protein;(source:Araport11)
6 DAS	AT3G44860	-0.669502	FAMT	farnesoic acid carboxyl-O-methyltransferase;(source:Araport11)
6 DAS	AT4G36030	-1.81691	ARO3	armadillo repeat only 3;(source:Araport11)
6 DAS	AT4G14370	1.57667	AT4G14370	Disease resistance protein (TIR-NBS-LRR class) family;(source:Araport11)
6 DAS	AT2G33380	-0.982408	RD20	Caleosin-related family protein;(source:Araport11)
6 DAS	AT5G19240	0.967993	AT5G19240	Glycoprotein membrane precursor GPI-anchored;(source:Araport11)
6 DAS	AT5G52760	-0.887496	AT5G52760	Copper transport protein family;(source:Araport11)
6 DAS	AT2G25735	-0.796693	AT2G25735	hypothetical protein;(source:Araport11)
6 DAS	AT4G22980	2.32007	AT4G22980	molybdenum cofactor sulfurase-like protein;(source:Araport11)
6 DAS	AT1G66920	7.6665	AT1G66920	Protein kinase superfamily protein;(source:Araport11)
6 DAS	AT1G67920	2.42549	AT1G67920	hypothetical protein;(source:Araport11)
6 DAS	AT1G59590	-1.67682	ZCF37	ZCF37;(source:Araport11)
6 DAS	AT3G26220	2.17865	CYP71B3	cytochrome P450, family 71, subfamily B, polypeptide 3;(source:Araport11)
6 DAS	AT4G23170	-0.675962	EP1	receptor-like protein kinase-related family protein;(source:Araport11)
6 DAS	AT3G50480	7.13646	HR4	homolog of RPW8 4;(source:Araport11)
6 DAS	AT4G23810	0.938591	WRKY53	WRKY family transcription factor;(source:Araport11)
6 DAS	AT1G28480	1.23409	GRX480	Thioredoxin superfamily protein;(source:Araport11)
6 DAS	AT2G41640	-1.24413	AT2G41640	Glycosyltransferase family 61 protein;(source:Araport11)
6 DAS	AT5G54720	-1.09598	AT5G54720	Ankyrin repeat family protein;(source:Araport11)
6 DAS	AT5G08760	1.20496	AT5G08760	transmembrane protein;(source:Araport11)
6 DAS	AT2G46430	0.70848	CNGC3	cyclic nucleotide gated channel 3;(source:Araport11)
6 DAS	AT5G67080	0	MAPKKK19	mitogen-activated protein kinase kinase kinase 19;(source:Araport11)
6 DAS	AT1G66550	7.6665	WRKY67	WRKY DNA-binding protein 67;(source:Araport11)
6 DAS	AT4G36500	0.55471	AT4G36500	hypothetical protein;(source:Araport11)
6 DAS	AT4G25900	-3.46995	AT4G25900	Galactose mutarotase-like superfamily protein;(source:Araport11)
6 DAS	AT5G35735	0.809265	AT5G35735	Auxin-responsive family protein;(source:Araport11)
6 DAS	AT3G48640	1.6338	AT3G48640	transmembrane protein;(source:Araport11)
6 DAS	AT1G08050	1.37664	AT1G08050	Zinc finger (C3HC4-type RING finger) family protein;(source:Araport11)
6 DAS	AT1G55450	1.36706	AT1G55450	S-adenosyl-L-methionine-dependent methyltransferases superfamily protein;(source:Araport11)
6 DAS	AT1G64610	-0.945075	AT1G64610	Transducin/WD40 repeat-like superfamily protein;(source:Araport11)
6 DAS	AT1G30755	3.18259	AT1G30755	elongation factor G, putative (DUF668);(source:Araport11)
6 DAS	AT1G11050	1.59719	AT1G11050	Protein kinase superfamily protein;(source:Araport11)
6 DAS	AT5G19230	2.28284	AT5G19230	Glycoprotein membrane precursor GPI-anchored;(source:Araport11)
6 DAS	AT1G72940	1.52556	AT1G72940	Toll-Interleukin-Resistance (TIR) domain-containing protein;(source:Araport11)
6 DAS	AT4G21903	-1.75392	AT4G21903	MATE efflux family protein;(source:Araport11)
6 DAS	AT5G18150	-1.55738	AT5G18150	Methyltransferase-related protein;(source:Araport11)
6 DAS	AT4G29780	-1.28323	AT4G29780	nuclease;(source:Araport11)
6 DAS	AT4G33920	0.698808	AT4G33920	Protein phosphatase 2C family protein;(source:Araport11)
6 DAS	AT4G39030	2.80516	EDS5	MATE efflux family protein;(source:Araport11)
6 DAS	AT3G28850	-1.12398	AT3G28850	Glutaredoxin family protein;(source:Araport11)
6 DAS	AT1G31130	-2.45441	AT1G31130	polyadenylate-binding protein 1-B-binding protein;(source:Araport11)
6 DAS	AT3G04210	1.33476	AT3G04210	Disease resistance protein (TIR-NBS class);(source:Araport11)
6 DAS	AT1G02220	0.45439	NAC003	NAC domain containing protein 3;(source:Araport11)
6 DAS	AT5G54710	0.63067	AT5G54710	Ankyrin repeat family protein;(source:Araport11)
6 DAS	AT1G52565	-0.579269	AT1G52565	cytochrome P450 family protein;(source:Araport11)
6 DAS	AT3G49780	-0.743662	PSK4	phytosulfokine 4 precursor;(source:Araport11)
6 DAS	AT1G73260	0.490072	KTI1	kunitz trypsin inhibitor 1;(source:Araport11)
6 DAS	AT1G20310	-1.85279	AT1G20310	syringolide-induced protein;(source:Araport11)
6 DAS	AT1G63720	1.836	AT1G63720	hydroxyproline-rich glycoprotein family protein;(source:Araport11)
6 DAS	AT5G23510	-0.352585	AT5G23510	hypothetical protein;(source:Araport11)
6 DAS	AT5G15870	0.577932	AT5G15870	glycosyl hydrolase family 81 protein;(source:Araport11)
6 DAS	AT5G08240	2.52247	AT5G08240	transmembrane protein;(source:Araport11)
6 DAS	AT1G21310	0.436727	EXT3	extensin 3;(source:Araport11)
6 DAS	AT5G08790	0.804984	ATAF2	NAC (No Apical Meristem) domain transcriptional regulator superfamily protein;(source:Araport11)
6 DAS	AT3G57640	-1.39258	AT3G57640	Protein kinase superfamily protein;(source:Araport11)
6 DAS	AT3G26210	-0.95592	CYP71B23	cytochrome P450, family 71, subfamily B, polypeptide 23;(source:Araport11)
6 DAS	AT3G55430	0.853831	AT3G55430	O-Glycosyl hydrolases family 17 protein;(source:Araport11)
6 DAS	AT5G42440	3.83625	AT5G42440	Protein kinase superfamily protein;(source:Araport11)
6 DAS	AT2G30550	-1.55881	AT2G30550	alpha/beta-Hydrolases superfamily protein;(source:Araport11)
6 DAS	AT1G65484	-0.568625	AT1G65484	transmembrane protein;(source:Araport11)
6 DAS	AT2G40270	0.64706	AT2G40270	Protein kinase family protein;(source:Araport11)
6 DAS	AT1G80450	-0.631281	AT1G80450	VQ motif-containing protein;(source:Araport11)
6 DAS	AT5G47960	-1.06736	RABA4C	RAB GTPase homolog A4C;(source:Araport11)
6 DAS	AT5G67350	0	AT5G67350	hypothetical protein;(source:Araport11)
6 DAS	AT4G11000	1.71439	AT4G11000	Ankyrin repeat family protein;(source:Araport11)
6 DAS	AT1G76970	0.976463	AT1G76970	Target of Myb protein 1;(source:Araport11)
6 DAS	AT1G43160	3.03482	RAP2.6	related to AP2 6;(source:Araport11)
6 DAS	AT2G19130	1.01894	AT2G19130	S-locus lectin protein kinase family protein;(source:Araport11)
6 DAS	AT3G51430	5.66151	YLS2	Calcium-dependent phosphotriesterase superfamily protein;(source:Araport11)
6 DAS	AT5G03350	-0.979832	AT5G03350	Legume lectin family protein;(source:Araport11)
6 DAS	AT5G57035	1.11375	AT5G57035	U-box domain-containing protein kinase family protein;(source:Araport11)
6 DAS	AT3G57450	0.915539	AT3G57450	hypothetical protein;(source:Araport11)
6 DAS	AT5G13330	0.524651	Rap2.6L	related to AP2 6l;(source:Araport11)
6 DAS	AT3G46690	-1.75714	AT3G46690	UDP-Glycosyltransferase superfamily protein;(source:Araport11)
6 DAS	AT4G22530	0.880211	AT4G22530	S-adenosyl-L-methionine-dependent methyltransferases superfamily protein;(source:Araport11)
6 DAS	AT3G48310	-1.16401	CYP71A22	cytochrome P450, family 71, subfamily A, polypeptide 22;(source:Araport11)
6 DAS	AT3G07195	0.44941	AT3G07195	RPM1-interacting protein 4 (RIN4) family protein;(source:Araport11)
6 DAS	AT1G59910	0.942706	AT1G59910	Actin-binding FH2 (formin homology 2) family protein;(source:Araport11)
6 DAS	AT3G22231	-1.07902	PCC1	pathogen and circadian controlled 1;(source:Araport11)
6 DAS	AT1G67850	2.08867	AT1G67850	lysine ketoglutarate reductase trans-splicing protein (DUF707);(source:Araport11)
6 DAS	AT5G64260	0	EXL2	EXORDIUM like 2;(source:Araport11)
6 DAS	AT3G02885	-0.875998	GASA5	GAST1 protein homolog 5;(source:Araport11)
6 DAS	AT4G10500	-1.01443	AT4G10500	2-oxoglutarate (2OG) and Fe(II)-dependent oxygenase superfamily protein;(source:Araport11)
6 DAS	AT2G40095	-1.85602	AT2G40095	Alpha/beta hydrolase related protein;(source:Araport11)
6 DAS	AT1G22400	0.694273	UGT85A1	UDP-Glycosyltransferase superfamily protein;(source:Araport11)
6 DAS	AT5G44568	-0.879638	AT5G44568	transmembrane protein;(source:Araport11)
6 DAS	AT1G25400	1.50895	AT1G25400	transmembrane protein;(source:Araport11)
6 DAS	AT1G28380	0.876083	NSL1	MAC/Perforin domain-containing protein;(source:Araport11)
6 DAS	AT1G15380	-0.484522	GLYI4	Lactoylglutathione lyase / glyoxalase I family protein;(source:Araport11)
6 DAS	AT3G11820	-0.827569	SYP121	syntaxin of plants 121;(source:Araport11)
6 DAS	AT5G57550	-0.748783	XTH25	xyloglucan endotransglucosylase/hydrolase 25;(source:Araport11)
6 DAS	AT3G26910	0.690607	AT3G26910	hydroxyproline-rich glycoprotein family protein;(source:Araport11)
6 DAS	AT5G64310	0	AGP1	arabinogalactan protein 1;(source:Araport11)
6 DAS	AT2G27500	0.640162	AT2G27500	Glycosyl hydrolase superfamily protein;(source:Araport11)
6 DAS	AT3G16510	-1.88548	AT3G16510	Calcium-dependent lipid-binding (CaLB domain) family protein;(source:Araport11)
6 DAS	AT5G05190	0.8102	AT5G05190	hypothetical protein (DUF3133);(source:Araport11)
6 DAS	AT2G40000	-1.95525	HSPRO2	ortholog of sugar beet HS1 PRO-1 2;(source:Araport11)
6 DAS	AT3G56400	-0.693988	WRKY70	WRKY DNA-binding protein 70;(source:Araport11)
6 DAS	AT1G29690	-2.21714	CAD1	MAC/Perforin domain-containing protein;(source:Araport11)
6 DAS	AT3G04640	0.617706	AT3G04640	glycine-rich protein;(source:Araport11)
6 DAS	AT3G52430	-1.99393	PAD4	alpha/beta-Hydrolases superfamily protein;(source:Araport11)
6 DAS	AT1G73740	-0.580451	AT1G73740	UDP-Glycosyltransferase superfamily protein;(source:Araport11)
6 DAS	AT1G05340	2.48087	AT1G05340	cysteine-rich TM module stress tolerance protein;(source:Araport11)
6 DAS	AT3G08760	2.49868	ATSIK	Protein kinase superfamily protein;(source:Araport11)
6 DAS	AT5G02290	-1.43977	NAK	Protein kinase superfamily protein;(source:Araport11)
6 DAS	AT2G39650	-0.785686	AT2G39650	cruciferin (DUF506);(source:Araport11)
6 DAS	AT2G18210	-1.14188	AT2G18210	hypothetical protein;(source:Araport11)
6 DAS	AT2G32800	2.23368	AP4.3A	protein kinase family protein;(source:Araport11)
6 DAS	AT5G57480	0.884907	AT5G57480	P-loop containing nucleoside triphosphate hydrolases superfamily protein;(source:Araport11)
6 DAS	AT1G25390	-0.591275	AT1G25390	Protein kinase superfamily protein;(source:Araport11)
6 DAS	AT2G35710	1.42093	PGSIP7	Nucleotide-diphospho-sugar transferases superfamily protein;(source:Araport11)
6 DAS	AT1G62305	3.87988	AT1G62305	Core-2/I-branching beta-1,6-N-acetylglucosaminyltransferase family protein;(source:Araport11)
6 DAS	AT5G45110	-2.86338	NPR3	NPR1-like protein 3;(source:Araport11)
6 DAS	AT5G05140	0.560621	AT5G05140	Transcription elongation factor (TFIIS) family protein;(source:Araport11)
6 DAS	AT5G39785	-0.759414	AT5G39785	hypothetical protein (DUF1666);(source:Araport11)
6 DAS	AT2G41410	-1.75359	AT2G41410	Calcium-binding EF-hand family protein;(source:Araport11)
6 DAS	AT4G23130	0.574972	CRK5	cysteine-rich RLK (RECEPTOR-like protein kinase) 5;(source:Araport11)
6 DAS	AT5G44390	2.46482	AT5G44390	FAD-binding Berberine family protein;(source:Araport11)
6 DAS	AT4G15610	-1.54858	AT4G15610	Uncharacterized protein family (UPF0497);(source:Araport11)
6 DAS	AT1G18860	-3.00253	WRKY61	WRKY DNA-binding protein 61;(source:Araport11)
6 DAS	AT2G43290	-0.858868	MSS3	Calcium-binding EF-hand family protein;(source:Araport11)
6 DAS	AT2G23450	-0.764192	AT2G23450	Protein kinase superfamily protein;(source:Araport11)
6 DAS	AT4G38550	-2.03058	AT4G38550	phospholipase-like protein (PEARLI 4) family protein;(source:Araport11)
6 DAS	AT2G17520	5.91783	IRE1A	Endoribonuclease/protein kinase IRE1-like protein;(source:Araport11)
6 DAS	AT1G77500	2.83671	AT1G77500	DUF630 family protein, putative (DUF630 and DUF632);(source:Araport11)
6 DAS	AT1G21270	0.945806	WAK2	wall-associated kinase 2;(source:Araport11)
6 DAS	AT4G28400	1.72661	AT4G28400	Protein phosphatase 2C family protein;(source:Araport11)
6 DAS	AT2G23200	0.795327	AT2G23200	Protein kinase superfamily protein;(source:Araport11)
6 DAS	AT1G14780	1.16734	AT1G14780	MAC/Perforin domain-containing protein;(source:Araport11)
6 DAS	AT5G11970	0.457133	AT5G11970	ABC family ABC transporter, putative (DUF3511);(source:Araport11)
6 DAS	AT5G40460	1.18442	AT5G40460	cyclin-dependent kinase inhibitor SMR3-like protein;(source:Araport11)
6 DAS	AT3G59880	-1.16603	AT3G59880	hypothetical protein;(source:Araport11)
6 DAS	AT2G16870	-2.00919	AT2G16870	Disease resistance protein (TIR-NBS-LRR class) family;(source:Araport11)
6 DAS	AT5G41100	-1.75313	AT5G41100	hydroxyproline-rich glycoprotein family protein;(source:Araport11)
6 DAS	AT3G15760	1.80074	AT3G15760	cytochrome P450 family protein;(source:Araport11)
6 DAS	AT2G29420	3.60307	GSTU7	glutathione S-transferase tau 7;(source:Araport11)
6 DAS	AT4G23270	0.91995	CRK19	cysteine-rich RLK (RECEPTOR-like protein kinase) 19;(source:Araport11)
6 DAS	AT1G02230	0.714326	NAC004	NAC domain containing protein 4;(source:Araport11)
6 DAS	AT4G05320	-1.9023	UBQ10	polyubiquitin 10;(source:Araport11)
6 DAS	AT1G64280	0.891637	NPR1	regulatory protein (NPR1);(source:Araport11)
6 DAS	AT5G04760	3.84654	AT5G04760	Duplicated homeodomain-like superfamily protein;(source:Araport11)
6 DAS	AT2G38610	-0.666341	AT2G38610	RNA-binding KH domain-containing protein;(source:Araport11)
6 DAS	AT2G17120	2.60155	LYM2	lysm domain GPI-anchored protein 2 precursor;(source:Araport11)
6 DAS	AT4G11300	1.38013	AT4G11300	ROH1, putative (DUF793);(source:Araport11)
6 DAS	AT2G37710	-0.833142	RLK	receptor lectin kinase;(source:Araport11)
6 DAS	AT1G63750	-0.792735	AT1G63750	Disease resistance protein (TIR-NBS-LRR class) family;(source:Araport11)
6 DAS	AT3G48320	-0.698535	CYP71A21	cytochrome P450, family 71, subfamily A, polypeptide 21;(source:Araport11)
6 DAS	AT3G01420	0.626777	DOX1	Peroxidase superfamily protein;(source:Araport11)
6 DAS	AT5G10750	2.86316	AT5G10750	enhanced disease resistance-like protein (DUF1336);(source:Araport11)
6 DAS	AT1G08720	1.39492	EDR1	Protein kinase superfamily protein;(source:Araport11)
6 DAS	AT5G43420	-1.43021	AT5G43420	RING/U-box superfamily protein;(source:Araport11)
6 DAS	AT3G17770	2.03714	AT3G17770	Dihydroxyacetone kinase;(source:Araport11)
6 DAS	AT4G36150	-2.11283	AT4G36150	Disease resistance protein (TIR-NBS-LRR class) family;(source:Araport11)
6 DAS	AT3G28100	-1.64555	UMAMIT45	nodulin MtN21 /EamA-like transporter family protein;(source:Araport11)
6 DAS	AT4G31800	1.35624	WRKY18	WRKY DNA-binding protein 18;(source:Araport11)
6 DAS	AT1G71220	-1.02151	EBS1	EMS-MUTAGENIZED BRI1 SUPPRESSOR 1;(source:Araport11)
6 DAS	AT4G28703	3.17954	AT4G28703	RmlC-like cupins superfamily protein;(source:Araport11)
6 DAS	AT1G15780	-1.31794	NRB4	mediator of RNA polymerase II transcription subunit 15a-like protein;(source:Araport11)
6 DAS	AT2G46150	-0.671276	AT2G46150	Late embryogenesis abundant (LEA) hydroxyproline-rich glycoprotein family;(source:Araport11)
6 DAS	AT4G29670	-1.03732	ACHT2	atypical CYS HIS rich thioredoxin 2;(source:Araport11)
6 DAS	AT4G24290	0.574392	AT4G24290	MAC/Perforin domain-containing protein;(source:Araport11)
6 DAS	AT5G51200	2.40573	EMB3142	nuclear pore complex protein (DUF3414);(source:Araport11)
6 DAS	AT4G03550	0.458583	GSL05	glucan synthase-like 5;(source:Araport11)
6 DAS	AT5G49570	-0.967931	PNG1	peptide-N-glycanase 1;(source:Araport11)
6 DAS	AT1G27770	0.734066	ACA1	autoinhibited Ca2+-ATPase 1;(source:Araport11)
6 DAS	AT3G07580	5.26625	AT3G07580	hypothetical protein;(source:Araport11)
6 DAS	AT3G48090	0.525921	EDS1	alpha/beta-Hydrolases superfamily protein;(source:Araport11)
6 DAS	AT1G63860	-1.89826	AT1G63860	Disease resistance protein (TIR-NBS-LRR class) family;(source:Araport11)
6 DAS	AT4G27740	-1.33947	AT4G27740	Yippee family putative zinc-binding protein;(source:Araport11)
6 DAS	AT5G40240	3.56493	UMAMIT40	nodulin MtN21 /EamA-like transporter family protein;(source:Araport11)
6 DAS	AT5G40690	0.829275	AT5G40690	histone-lysine N-methyltransferase trithorax-like protein;(source:Araport11)
6 DAS	AT1G65610	1.57336	KOR2	Six-hairpin glycosidases superfamily protein;(source:Araport11)
6 DAS	AT3G26600	0.892434	ARO4	armadillo repeat only 4;(source:Araport11)
6 DAS	AT4G01720	0.798942	WRKY47	WRKY family transcription factor;(source:Araport11)
6 DAS	AT4G02195	0.457885	SYP42	syntaxin of plants 42;(source:Araport11)
6 DAS	AT5G02320	-1.27101	MYB3R-5	myb domain protein 3r-5;(source:Araport11)
6 DAS	AT4G01370	-0.759148	MPK4	MAP kinase 4;(source:Araport11)
6 DAS	AT1G27100	2.84712	AT1G27100	Actin cross-linking protein;(source:Araport11)
6 DAS	AT2G38000	0.765909	AT2G38000	chaperone protein dnaJ-like protein;(source:Araport11)
6 DAS	AT3G14060	2.18395	AT3G14060	hypothetical protein;(source:Araport11)
6 DAS	AT3G15810	-1.02784	AT3G15810	LURP-one-like protein (DUF567);(source:Araport11)
6 DAS	AT3G13330	0.692389	PA200	proteasome activating protein 200;(source:Araport11)
6 DAS	AT5G19250	-1.17752	AT5G19250	Glycoprotein membrane precursor GPI-anchored;(source:Araport11)
6 DAS	AT1G18720	-0.312844	AT1G18720	ER membrane protein, putative (DUF962);(source:Araport11)
6 DAS	AT4G16890	-1.75392	SNC1	TIR-NBS-LRR class disease resistance protein;(source:Araport11)
6 DAS	AT3G04670	-1.97737	WRKY39	WRKY DNA-binding protein 39;(source:Araport11)
6 DAS	AT4G16500	0.73482	AT4G16500	Cystatin/monellin superfamily protein;(source:Araport11)
6 DAS	AT4G39820	-0.570915	AT4G39820	Tetratricopeptide repeat (TPR)-like superfamily protein;(source:Araport11)
6 DAS	AT4G20380	-2.11848	LSD1	LSD1 zinc finger family protein;(source:Araport11)
6 DAS	AT5G24360	-1.52424	IRE1-1	inositol requiring 1-1;(source:Araport11)
6 DAS	AT2G34690	5.70062	ACD11	Glycolipid transfer protein (GLTP) family protein;(source:Araport11)
6 DAS	AT1G62810	0.778373	CuAO1	Copper amine oxidase family protein;(source:Araport11)
10 DAS	AT5G36970	6.55768	NHL25	NDR1/HIN1-like 25;(source:Araport11)
10 DAS	AT1G15520	5.80837	ABCG40	pleiotropic drug resistance 12;(source:Araport11)
10 DAS	AT1G06137	4.25611	AT1G06137	transmembrane protein;(source:Araport11)
10 DAS	AT1G79680	4.18818	WAKL10	WALL ASSOCIATED KINASE (WAK)-LIKE 10;(source:Araport11)
10 DAS	AT3G44860	3.88416	FAMT	farnesoic acid carboxyl-O-methyltransferase;(source:Araport11)
10 DAS	AT1G21240	3.5878	WAK3	wall associated kinase 3;(source:Araport11)
10 DAS	AT2G44070	3.55698	AT2G44070	NagB/RpiA/CoA transferase-like superfamily protein;(source:Araport11)
10 DAS	AT5G40990	3.53949	GLIP1	GDSL lipase 1;(source:Araport11)
10 DAS	AT1G56250	3.51741	PP2-B14	phloem protein 2-B14;(source:Araport11)
10 DAS	AT1G21250	3.43509	WAK1	cell wall-associated kinase;(source:Araport11)
10 DAS	AT3G18250	3.42984	AT3G18250	Putative membrane lipoprotein;(source:Araport11)
10 DAS	AT4G21840	3.34687	MSRB8	methionine sulfoxide reductase B8;(source:Araport11)
10 DAS	AT5G57010	3.32099	AT5G57010	calmodulin-binding family protein;(source:Araport11)
10 DAS	AT1G56240	3.25419	PP2-B13	phloem protein 2-B13;(source:Araport11)
10 DAS	AT5G54610	3.23333	ANK	ankyrin;(source:Araport11)
10 DAS	AT4G03450	3.23173	AT4G03450	Ankyrin repeat family protein;(source:Araport11)
10 DAS	AT5G67080	3.19626	MAPKKK19	mitogen-activated protein kinase kinase kinase 19;(source:Araport11)
10 DAS	AT4G22030	3.13865	AT4G22030	F-box protein with a domain protein;(source:Araport11)
10 DAS	AT4G35180	3.13609	LHT7	LYS/HIS transporter 7;(source:Araport11)
10 DAS	AT1G76930	3.06693	EXT4	extensin 4;(source:Araport11)
10 DAS	AT2G01300	3.03243	AT2G01300	mediator of RNA polymerase II transcription subunit;(source:Araport11)
10 DAS	AT1G21310	3.02666	EXT3	extensin 3;(source:Araport11)
10 DAS	AT2G14560	3.02121	LURP1	LURP-one-like protein (DUF567);(source:Araport11)
10 DAS	AT3G13950	2.88086	AT3G13950	ankyrin;(source:Araport11)
10 DAS	AT4G23030	2.84836	AT4G23030	MATE efflux family protein;(source:Araport11)
10 DAS	AT3G50930	2.83858	BCS1	cytochrome BC1 synthesi;(source:Araport11)
10 DAS	AT2G13810	2.83562	ALD1	AGD2-like defense response protein 1;(source:Araport11)
10 DAS	AT3G55840	2.78866	AT3G55840	Hs1pro-1 protein;(source:Araport11)
10 DAS	AT2G33380	2.74982	RD20	Caleosin-related family protein;(source:Araport11)
10 DAS	AT2G32140	2.7299	AT2G32140	transmembrane receptor;(source:Araport11)
10 DAS	AT3G51450	2.70974	AT3G51450	Calcium-dependent phosphotriesterase superfamily protein;(source:Araport11)
10 DAS	AT5G60900	2.67583	RLK1	receptor-like protein kinase 1;(source:Araport11)
10 DAS	AT2G04070	2.63066	AT2G04070	MATE efflux family protein;(source:Araport11)
10 DAS	AT3G13433	2.57278	AT3G13433	transmembrane protein;(source:Araport11)
10 DAS	AT5G22520	2.56644	AT5G22520	hypothetical protein;(source:Araport11)
10 DAS	AT1G07135	2.53533	AT1G07135	glycine-rich protein;(source:Araport11)
10 DAS	AT2G30550	2.49725	AT2G30550	alpha/beta-Hydrolases superfamily protein;(source:Araport11)
10 DAS	AT1G28480	2.48095	GRX480	Thioredoxin superfamily protein;(source:Araport11)
10 DAS	AT4G14450	2.47418	AT4G14450	hypothetical protein;(source:Araport11)
10 DAS	AT3G29000	2.45819	AT3G29000	Calcium-binding EF-hand family protein;(source:Araport11)
10 DAS	AT4G23280	2.37504	CRK20	cysteine-rich RLK (RECEPTOR-like protein kinase) 20;(source:Araport11)
10 DAS	AT5G17760	2.35903	AT5G17760	P-loop containing nucleoside triphosphate hydrolases superfamily protein;(source:Araport11)
10 DAS	AT1G21270	2.30865	WAK2	wall-associated kinase 2;(source:Araport11)
10 DAS	AT3G02800	2.3051	PFA-DSP3	Tyrosine phosphatase family protein;(source:Araport11)
10 DAS	AT1G68620	2.30323	AT1G68620	alpha/beta-Hydrolases superfamily protein;(source:Araport11)
10 DAS	AT1G66700	2.29717	PXMT1	S-adenosyl-L-methionine-dependent methyltransferases superfamily protein;(source:Araport11)
10 DAS	AT4G14400	2.29067	ACD6	ankyrin repeat family protein;(source:Araport11)
10 DAS	AT5G52760	2.25236	AT5G52760	Copper transport protein family;(source:Araport11)
10 DAS	AT5G26690	2.23281	AT5G26690	Heavy metal transport/detoxification superfamily protein;(source:Araport11)
10 DAS	AT1G73260	2.23048	KTI1	kunitz trypsin inhibitor 1;(source:Araport11)
10 DAS	AT5G41750	2.20655	AT5G41750	Disease resistance protein (TIR-NBS-LRR class) family;(source:Araport11)
10 DAS	AT3G45860	2.19521	CRK4	cysteine-rich RLK (RECEPTOR-like protein kinase) 4;(source:Araport11)
10 DAS	AT1G08940	2.18185	AT1G08940	Phosphoglycerate mutase family protein;(source:Araport11)
10 DAS	AT1G13520	2.17501	AT1G13520	hypothetical protein (DUF1262);(source:Araport11)
10 DAS	AT1G65610	2.17303	KOR2	Six-hairpin glycosidases superfamily protein;(source:Araport11)
10 DAS	AT3G11340	2.16887	UGT76B1	UDP-Glycosyltransferase superfamily protein;(source:Araport11)
10 DAS	AT4G39580	2.14921	AT4G39580	Galactose oxidase/kelch repeat superfamily protein;(source:Araport11)
10 DAS	AT1G66870	2.14625	AT1G66870	Carbohydrate-binding X8 domain superfamily protein;(source:Araport11)
10 DAS	AT2G04495	2.13385	AT2G04495	transmembrane protein;(source:Araport11)
10 DAS	AT4G39030	2.09611	EDS5	MATE efflux family protein;(source:Araport11)
10 DAS	AT2G25460	2.08967	AT2G25460	EEIG1/EHBP1 protein amino-terminal domain protein;(source:Araport11)
10 DAS	AT5G15870	2.08636	AT5G15870	glycosyl hydrolase family 81 protein;(source:Araport11)
10 DAS	AT1G02220	2.08027	NAC003	NAC domain containing protein 3;(source:Araport11)
10 DAS	AT1G53625	2.07556	AT1G53625	hypothetical protein;(source:Araport11)
10 DAS	AT4G23610	2.03815	AT4G23610	Late embryogenesis abundant (LEA) hydroxyproline-rich glycoprotein family;(source:Araport11)
10 DAS	AT2G29720	2.03734	CTF2B	FAD/NAD(P)-binding oxidoreductase family protein;(source:Araport11)
10 DAS	AT4G14365	2.03534	XBAT34	hypothetical protein;(source:Araport11)
10 DAS	AT3G22231	2.0026	PCC1	pathogen and circadian controlled 1;(source:Araport11)
10 DAS	AT5G06320	1.97913	NHL3	NDR1/HIN1-like 3;(source:Araport11)
10 DAS	AT1G51920	1.97706	AT1G51920	transmembrane protein;(source:Araport11)
10 DAS	AT5G65600	1.97042	AT5G65600	Concanavalin A-like lectin protein kinase family protein;(source:Araport11)
10 DAS	AT1G43160	1.94242	RAP2.6	related to AP2 6;(source:Araport11)
10 DAS	AT2G46400	1.93952	WRKY46	WRKY DNA-binding protein 46;(source:Araport11)
10 DAS	AT4G23220	1.92581	CRK14	cysteine-rich RECEPTOR-like kinase;(source:Araport11)
10 DAS	AT1G26420	1.91339	AT1G26420	FAD-binding Berberine family protein;(source:Araport11)
10 DAS	AT3G61190	1.9132	BAP1	BON association protein 1;(source:Araport11)
10 DAS	AT3G29250	1.9036	SDR4	NAD(P)-binding Rossmann-fold superfamily protein;(source:Araport11)
10 DAS	AT1G22400	1.90238	UGT85A1	UDP-Glycosyltransferase superfamily protein;(source:Araport11)
10 DAS	AT4G25900	1.88518	AT4G25900	Galactose mutarotase-like superfamily protein;(source:Araport11)
10 DAS	AT1G08050	1.88139	AT1G08050	Zinc finger (C3HC4-type RING finger) family protein;(source:Araport11)
10 DAS	AT1G02230	1.87465	NAC004	NAC domain containing protein 4;(source:Araport11)
10 DAS	AT1G03220	1.85531	AT1G03220	Eukaryotic aspartyl protease family protein;(source:Araport11)
10 DAS	AT5G44568	1.83401	AT5G44568	transmembrane protein;(source:Araport11)
10 DAS	AT5G46080	1.81685	AT5G46080	Protein kinase superfamily protein;(source:Araport11)
10 DAS	AT1G14880	1.81518	PCR1	PLANT CADMIUM RESISTANCE 1;(source:Araport11)
10 DAS	AT3G25882	1.8088	NIMIN-2	NIM1-interacting 2;(source:Araport11)
10 DAS	AT1G58225	1.79697	AT1G58225	hypothetical protein;(source:Araport11)
10 DAS	AT5G49850	1.79675	AT5G49850	Mannose-binding lectin superfamily protein;(source:Araport11)
10 DAS	AT4G22530	1.78011	AT4G22530	S-adenosyl-L-methionine-dependent methyltransferases superfamily protein;(source:Araport11)
10 DAS	AT3G56400	1.77613	WRKY70	WRKY DNA-binding protein 70;(source:Araport11)
10 DAS	AT3G51430	1.77178	YLS2	Calcium-dependent phosphotriesterase superfamily protein;(source:Araport11)
10 DAS	AT1G52565	1.76446	AT1G52565	cytochrome P450 family protein;(source:Araport11)
10 DAS	AT4G36030	1.753	ARO3	armadillo repeat only 3;(source:Araport11)
10 DAS	AT5G08760	1.74973	AT5G08760	transmembrane protein;(source:Araport11)
10 DAS	AT5G35735	1.74025	AT5G35735	Auxin-responsive family protein;(source:Araport11)
10 DAS	AT5G25930	1.73994	AT5G25930	kinase family with leucine-rich repeat domain-containing protein;(source:Araport11)
10 DAS	AT4G22980	1.72796	AT4G22980	molybdenum cofactor sulfurase-like protein;(source:Araport11)
10 DAS	AT3G52400	1.72011	SYP122	syntaxin of plants 122;(source:Araport11)
10 DAS	AT1G36622	1.71726	AT1G36622	transmembrane protein;(source:Araport11)
10 DAS	AT2G04450	1.69313	NUDT6	nudix hydrolase homolog 6;(source:Araport11)
10 DAS	AT3G48640	1.67356	AT3G48640	transmembrane protein;(source:Araport11)
10 DAS	AT5G41740	1.67214	AT5G41740	Disease resistance protein (TIR-NBS-LRR class) family;(source:Araport11)
10 DAS	AT3G50480	1.66701	HR4	homolog of RPW8 4;(source:Araport11)
10 DAS	AT4G21850	1.6652	MSRB9	methionine sulfoxide reductase B9;(source:Araport11)
10 DAS	AT3G55430	1.64635	AT3G55430	O-Glycosyl hydrolases family 17 protein;(source:Araport11)
10 DAS	AT3G06890	1.63167	AT3G06890	transmembrane protein;(source:Araport11)
10 DAS	AT5G01900	1.62474	WRKY62	WRKY DNA-binding protein 62;(source:Araport11)
10 DAS	AT1G20310	1.61077	AT1G20310	syringolide-induced protein;(source:Araport11)
10 DAS	AT5G42830	1.58288	AT5G42830	HXXXD-type acyl-transferase family protein;(source:Araport11)
10 DAS	AT1G07620	1.56241	ATOBGM	GTP-binding protein Obg/CgtA;(source:Araport11)
10 DAS	AT4G12500	1.52764	AT4G12500	Bifunctional inhibitor/lipid-transfer protein/seed storage 2S albumin superfamily protein;(source:Araport11)
10 DAS	AT5G64310	1.51678	AGP1	arabinogalactan protein 1;(source:Araport11)
10 DAS	AT3G47090	1.49388	AT3G47090	Leucine-rich repeat protein kinase family protein;(source:Araport11)
10 DAS	AT2G18690	1.47465	AT2G18690	transmembrane protein;(source:Araport11)
10 DAS	AT1G61340	1.46869	FBS1	F-box family protein;(source:Araport11)
10 DAS	AT1G30755	1.46859	AT1G30755	elongation factor G, putative (DUF668);(source:Araport11)
10 DAS	AT1G10040	1.45372	AT1G10040	alpha/beta-Hydrolases superfamily protein;(source:Araport11)
10 DAS	AT3G59080	1.43169	AT3G59080	Eukaryotic aspartyl protease family protein;(source:Araport11)
10 DAS	AT2G42980	1.42283	AT2G42980	Eukaryotic aspartyl protease family protein;(source:Araport11)
10 DAS	AT5G38310	1.40306	AT5G38310	hypothetical protein;(source:Araport11)
10 DAS	AT3G52430	1.40191	PAD4	alpha/beta-Hydrolases superfamily protein;(source:Araport11)
10 DAS	AT5G45110	1.39176	NPR3	NPR1-like protein 3;(source:Araport11)
10 DAS	AT1G77500	1.38315	AT1G77500	DUF630 family protein, putative (DUF630 and DUF632);(source:Araport11)
10 DAS	AT4G29780	1.3827	AT4G29780	nuclease;(source:Araport11)
10 DAS	AT5G52750	1.38244	AT5G52750	Heavy metal transport/detoxification superfamily protein;(source:Araport11)
10 DAS	AT1G66880	1.37471	AT1G66880	Protein kinase superfamily protein;(source:Araport11)
10 DAS	AT5G23510	1.37055	AT5G23510	hypothetical protein;(source:Araport11)
10 DAS	AT4G36500	1.3608	AT4G36500	hypothetical protein;(source:Araport11)
10 DAS	AT3G26230	1.36063	CYP71B24	cytochrome P450, family 71, subfamily B, polypeptide 24;(source:Araport11)
10 DAS	AT4G31800	1.35656	WRKY18	WRKY DNA-binding protein 18;(source:Araport11)
10 DAS	AT2G29420	1.34003	GSTU7	glutathione S-transferase tau 7;(source:Araport11)
10 DAS	AT5G57550	1.33792	XTH25	xyloglucan endotransglucosylase/hydrolase 25;(source:Araport11)
10 DAS	AT3G14060	1.32533	AT3G14060	hypothetical protein;(source:Araport11)
10 DAS	AT5G47960	1.32232	RABA4C	RAB GTPase homolog A4C;(source:Araport11)
10 DAS	AT5G24110	1.31455	WRKY30	WRKY DNA-binding protein 30;(source:Araport11)
10 DAS	AT3G11820	1.31087	SYP121	syntaxin of plants 121;(source:Araport11)
10 DAS	AT1G64610	1.30819	AT1G64610	Transducin/WD40 repeat-like superfamily protein;(source:Araport11)
10 DAS	AT4G14370	1.30199	AT4G14370	Disease resistance protein (TIR-NBS-LRR class) family;(source:Araport11)
10 DAS	AT4G23170	1.27236	EP1	receptor-like protein kinase-related family protein;(source:Araport11)
10 DAS	AT5G40690	1.26841	AT5G40690	histone-lysine N-methyltransferase trithorax-like protein;(source:Araport11)
10 DAS	AT5G08790	1.26074	ATAF2	NAC (No Apical Meristem) domain transcriptional regulator superfamily protein;(source:Araport11)
10 DAS	AT3G26220	1.25611	CYP71B3	cytochrome P450, family 71, subfamily B, polypeptide 3;(source:Araport11)
10 DAS	AT1G51860	1.25174	AT1G51860	Leucine-rich repeat protein kinase family protein;(source:Araport11)
10 DAS	AT2G21510	1.24369	AT2G21510	DNAJ heat shock N-terminal domain-containing protein;(source:Araport11)
10 DAS	AT1G62305	1.24234	AT1G62305	Core-2/I-branching beta-1,6-N-acetylglucosaminyltransferase family protein;(source:Araport11)
10 DAS	AT3G04290	1.24066	LTL1	Li-tolerant lipase 1;(source:Araport11)
10 DAS	AT5G57035	1.23274	AT5G57035	U-box domain-containing protein kinase family protein;(source:Araport11)
10 DAS	AT1G67850	1.23272	AT1G67850	lysine ketoglutarate reductase trans-splicing protein (DUF707);(source:Araport11)
10 DAS	AT5G13330	1.2168	Rap2.6L	related to AP2 6l;(source:Araport11)
10 DAS	AT1G80450	1.21577	AT1G80450	VQ motif-containing protein;(source:Araport11)
10 DAS	AT3G16510	1.21434	AT3G16510	Calcium-dependent lipid-binding (CaLB domain) family protein;(source:Araport11)
10 DAS	AT3G55470	1.20516	AT3G55470	Calcium-dependent lipid-binding (CaLB domain) family protein;(source:Araport11)
10 DAS	AT5G19240	1.20358	AT5G19240	Glycoprotein membrane precursor GPI-anchored;(source:Araport11)
10 DAS	AT3G17770	1.20159	AT3G17770	Dihydroxyacetone kinase;(source:Araport11)
10 DAS	AT3G57450	1.20005	AT3G57450	hypothetical protein;(source:Araport11)
10 DAS	AT3G20470	1.19566	GRP5	glycine-rich protein 5;(source:Araport11)
10 DAS	AT5G67350	1.19376	AT5G67350	hypothetical protein;(source:Araport11)
10 DAS	AT1G18860	1.18457	WRKY61	WRKY DNA-binding protein 61;(source:Araport11)
10 DAS	AT4G27652	1.1666	AT4G27652	hypothetical protein;(source:Araport11)
10 DAS	AT1G80840	1.16441	WRKY40	WRKY DNA-binding protein 40;(source:Araport11)
10 DAS	AT5G22570	1.15563	WRKY38	WRKY DNA-binding protein 38;(source:Araport11)
10 DAS	AT1G11050	1.14491	AT1G11050	Protein kinase superfamily protein;(source:Araport11)
10 DAS	AT2G16870	1.14447	AT2G16870	Disease resistance protein (TIR-NBS-LRR class) family;(source:Araport11)
10 DAS	AT4G13340	1.14108	LRX3	Leucine-rich repeat (LRR) family protein;(source:Araport11)
10 DAS	AT2G43290	1.12506	MSS3	Calcium-binding EF-hand family protein;(source:Araport11)
10 DAS	AT1G31130	1.12429	AT1G31130	polyadenylate-binding protein 1-B-binding protein;(source:Araport11)
10 DAS	AT3G48080	1.10787	AT3G48080	alpha/beta-Hydrolases superfamily protein;(source:Araport11)
10 DAS	AT3G26210	1.09536	CYP71B23	cytochrome P450, family 71, subfamily B, polypeptide 23;(source:Araport11)
10 DAS	AT2G30500	1.09273	NET4B	Kinase interacting (KIP1-like) family protein;(source:Araport11)
10 DAS	AT1G72940	1.07891	AT1G72940	Toll-Interleukin-Resistance (TIR) domain-containing protein;(source:Araport11)
10 DAS	AT3G04210	1.07281	AT3G04210	Disease resistance protein (TIR-NBS class);(source:Araport11)
10 DAS	AT1G76970	1.06423	AT1G76970	Target of Myb protein 1;(source:Araport11)
10 DAS	AT5G18150	1.06289	AT5G18150	Methyltransferase-related protein;(source:Araport11)
10 DAS	AT2G46430	1.06132	CNGC3	cyclic nucleotide gated channel 3;(source:Araport11)
10 DAS	AT4G26120	1.05926	AT4G26120	Ankyrin repeat family protein / BTB/POZ domain-containing protein;(source:Araport11)
10 DAS	AT1G59910	1.05871	AT1G59910	Actin-binding FH2 (formin homology 2) family protein;(source:Araport11)
10 DAS	AT5G05190	1.05756	AT5G05190	hypothetical protein (DUF3133);(source:Araport11)
10 DAS	AT5G11510	1.05027	MYB3R-4	myb domain protein 3r-4;(source:Araport11)
10 DAS	AT4G05320	1.03311	UBQ10	polyubiquitin 10;(source:Araport11)
10 DAS	AT3G51440	1.02776	AT3G51440	Calcium-dependent phosphotriesterase superfamily protein;(source:Araport11)
10 DAS	AT3G28850	1.02462	AT3G28850	Glutaredoxin family protein;(source:Araport11)
10 DAS	AT3G04640	1.01498	AT3G04640	glycine-rich protein;(source:Araport11)
10 DAS	AT3G01420	1.0076	DOX1	Peroxidase superfamily protein;(source:Araport11)
10 DAS	AT1G29690	0.999525	CAD1	MAC/Perforin domain-containing protein;(source:Araport11)
10 DAS	AT5G45470	0.995126	AT5G45470	transmembrane protein, putative (DUF594);(source:Araport11)
10 DAS	AT2G32800	0.991237	AP4.3A	protein kinase family protein;(source:Araport11)
10 DAS	AT1G25400	0.990486	AT1G25400	transmembrane protein;(source:Araport11)
10 DAS	AT3G26910	0.963733	AT3G26910	hydroxyproline-rich glycoprotein family protein;(source:Araport11)
10 DAS	AT4G34480	0.943575	AT4G34480	O-Glycosyl hydrolases family 17 protein;(source:Araport11)
10 DAS	AT1G67920	0.939521	AT1G67920	hypothetical protein;(source:Araport11)
10 DAS	AT1G25390	0.938758	AT1G25390	Protein kinase superfamily protein;(source:Araport11)
10 DAS	AT1G71220	0.934817	EBS1	EMS-MUTAGENIZED BRI1 SUPPRESSOR 1;(source:Araport11)
10 DAS	AT4G15610	0.922855	AT4G15610	Uncharacterized protein family (UPF0497);(source:Araport11)
10 DAS	AT2G35710	0.922635	PGSIP7	Nucleotide-diphospho-sugar transferases superfamily protein;(source:Araport11)
10 DAS	AT5G18270	0.91918	ANAC087	NAC domain containing protein 87;(source:Araport11)
10 DAS	AT1G59590	0.918503	ZCF37	ZCF37;(source:Araport11)
10 DAS	AT2G40750	0.90936	WRKY54	WRKY DNA-binding protein 54;(source:Araport11)
10 DAS	AT5G49570	0.906863	PNG1	peptide-N-glycanase 1;(source:Araport11)
10 DAS	AT5G11970	0.882545	AT5G11970	ABC family ABC transporter, putative (DUF3511);(source:Araport11)
10 DAS	AT5G45510	0.877923	AT5G45510	Leucine-rich repeat (LRR) family protein;(source:Araport11)
10 DAS	AT2G41640	0.872366	AT2G41640	Glycosyltransferase family 61 protein;(source:Araport11)
10 DAS	AT1G28380	0.871439	NSL1	MAC/Perforin domain-containing protein;(source:Araport11)
10 DAS	AT3G54000	0.870782	AT3G54000	TIP41-like protein;(source:Araport11)
10 DAS	AT3G49780	0.865205	PSK4	phytosulfokine 4 precursor;(source:Araport11)
10 DAS	AT3G07195	0.864295	AT3G07195	RPM1-interacting protein 4 (RIN4) family protein;(source:Araport11)
10 DAS	AT2G27500	0.863211	AT2G27500	Glycosyl hydrolase superfamily protein;(source:Araport11)
10 DAS	AT2G18210	0.842849	AT2G18210	hypothetical protein;(source:Araport11)
10 DAS	AT4G33920	0.841318	AT4G33920	Protein phosphatase 2C family protein;(source:Araport11)
10 DAS	AT5G19230	0.841286	AT5G19230	Glycoprotein membrane precursor GPI-anchored;(source:Araport11)
10 DAS	AT5G41100	0.837413	AT5G41100	hydroxyproline-rich glycoprotein family protein;(source:Araport11)
10 DAS	AT5G04760	0.824445	AT5G04760	Duplicated homeodomain-like superfamily protein;(source:Araport11)
10 DAS	AT5G46050	0.821277	PTR3	peptide transporter 3;(source:Araport11)
10 DAS	AT1G55450	0.818876	AT1G55450	S-adenosyl-L-methionine-dependent methyltransferases superfamily protein;(source:Araport11)
10 DAS	AT2G23450	0.80339	AT2G23450	Protein kinase superfamily protein;(source:Araport11)
10 DAS	AT2G25735	0.793079	AT2G25735	hypothetical protein;(source:Araport11)
10 DAS	AT4G03550	0.790564	GSL05	glucan synthase-like 5;(source:Araport11)
10 DAS	AT2G39650	0.753736	AT2G39650	cruciferin (DUF506);(source:Araport11)
10 DAS	AT4G27740	0.753407	AT4G27740	Yippee family putative zinc-binding protein;(source:Araport11)
10 DAS	AT4G38550	0.743767	AT4G38550	phospholipase-like protein (PEARLI 4) family protein;(source:Araport11)
10 DAS	AT3G56880	0.740877	AT3G56880	VQ motif-containing protein;(source:Araport11)
10 DAS	AT5G17490	0.740694	RGL3	RGA-like protein 3;(source:Araport11)
10 DAS	AT1G63720	0.737943	AT1G63720	hydroxyproline-rich glycoprotein family protein;(source:Araport11)
10 DAS	AT5G19250	0.735367	AT5G19250	Glycoprotein membrane precursor GPI-anchored;(source:Araport11)
10 DAS	AT5G10750	0.735086	AT5G10750	enhanced disease resistance-like protein (DUF1336);(source:Araport11)
10 DAS	AT2G17120	0.732384	LYM2	lysm domain GPI-anchored protein 2 precursor;(source:Araport11)
10 DAS	AT3G05710	0.727427	SYP43	syntaxin of plants 43;(source:Araport11)
10 DAS	AT2G40270	0.726993	AT2G40270	Protein kinase family protein;(source:Araport11)
10 DAS	AT4G11300	0.726351	AT4G11300	ROH1, putative (DUF793);(source:Araport11)
10 DAS	AT1G73740	0.725455	AT1G73740	UDP-Glycosyltransferase superfamily protein;(source:Araport11)
10 DAS	AT2G44500	0.714687	AT2G44500	O-fucosyltransferase family protein;(source:Araport11)
10 DAS	AT2G38610	0.681577	AT2G38610	RNA-binding KH domain-containing protein;(source:Araport11)
10 DAS	AT5G64260	0.677697	EXL2	EXORDIUM like 2;(source:Araport11)
10 DAS	AT3G07580	0.67685	AT3G07580	hypothetical protein;(source:Araport11)
10 DAS	AT3G46690	0.673099	AT3G46690	UDP-Glycosyltransferase superfamily protein;(source:Araport11)
10 DAS	AT5G40240	0.670949	UMAMIT40	nodulin MtN21 /EamA-like transporter family protein;(source:Araport11)
10 DAS	AT1G64280	0.670827	NPR1	regulatory protein (NPR1);(source:Araport11)
10 DAS	AT3G26600	0.669639	ARO4	armadillo repeat only 4;(source:Araport11)
10 DAS	AT3G13330	0.669476	PA200	proteasome activating protein 200;(source:Araport11)
10 DAS	AT5G45500	0.662021	AT5G45500	RNI-like superfamily protein;(source:Araport11)
10 DAS	AT5G42440	0.655769	AT5G42440	Protein kinase superfamily protein;(source:Araport11)
10 DAS	AT1G66350	0.628019	RGL1	RGA-like 1;(source:Araport11)
10 DAS	AT2G20370	0.626704	MUR3	Exostosin family protein;(source:Araport11)
10 DAS	AT5G05140	0.626396	AT5G05140	Transcription elongation factor (TFIIS) family protein;(source:Araport11)
10 DAS	AT4G29670	0.623584	ACHT2	atypical CYS HIS rich thioredoxin 2;(source:Araport11)
10 DAS	AT2G37710	0.61161	RLK	receptor lectin kinase;(source:Araport11)
10 DAS	AT5G02290	0.610459	NAK	Protein kinase superfamily protein;(source:Araport11)
10 DAS	AT3G04670	0.597832	WRKY39	WRKY DNA-binding protein 39;(source:Araport11)
10 DAS	AT5G08240	0.591993	AT5G08240	transmembrane protein;(source:Araport11)
10 DAS	AT4G01370	0.589619	MPK4	MAP kinase 4;(source:Araport11)
10 DAS	AT4G21903	0.57707	AT4G21903	MATE efflux family protein;(source:Araport11)
10 DAS	AT4G16500	0.565368	AT4G16500	Cystatin/monellin superfamily protein;(source:Araport11)
10 DAS	AT5G62865	0.561396	AT5G62865	hypothetical protein;(source:Araport11)
10 DAS	AT4G28400	0.55435	AT4G28400	Protein phosphatase 2C family protein;(source:Araport11)
10 DAS	AT3G28100	0.553278	UMAMIT45	nodulin MtN21 /EamA-like transporter family protein;(source:Araport11)
10 DAS	AT1G19570	0.552456	DHAR1	dehydroascorbate reductase;(source:Araport11)
10 DAS	AT4G01720	0.552046	WRKY47	WRKY family transcription factor;(source:Araport11)
10 DAS	AT2G41410	0.539889	AT2G41410	Calcium-binding EF-hand family protein;(source:Araport11)
10 DAS	AT1G08720	0.532672	EDR1	Protein kinase superfamily protein;(source:Araport11)
10 DAS	AT3G15810	0.448136	AT3G15810	LURP-one-like protein (DUF567);(source:Araport11)
10 DAS	AT1G13960	0.438941	WRKY4	WRKY DNA-binding protein 4;(source:Araport11)
10 DAS	AT1G18720	0.435131	AT1G18720	ER membrane protein, putative (DUF962);(source:Araport11)
10 DAS	AT4G04695	0.433253	CPK31	calcium-dependent protein kinase 31;(source:Araport11)
10 DAS	AT2G04880	0.431983	ZAP1	zinc-dependent activator protein-1;(source:Araport11)
10 DAS	AT2G03760	0.415005	SOT12	sulfotransferase 12;(source:Araport11)
10 DAS	AT5G67300	0.408849	MYBR1	myb domain protein r1;(source:Araport11)
10 DAS	AT4G23270	0.385001	CRK19	cysteine-rich RLK (RECEPTOR-like protein kinase) 19;(source:Araport11)
10 DAS	AT5G24530	0.377664	DMR6	2-oxoglutarate (2OG) and Fe(II)-dependent oxygenase superfamily protein;(source:Araport11)
10 DAS	AT3G49060	0.361825	AT3G49060	U-box domain-containing protein kinase family protein;(source:Araport11)
10 DAS	AT2G42490	0.356113	AT2G42490	Copper amine oxidase family protein;(source:Araport11)

## Sheet: ROS
Differentially expressed genes (DEGs) assigned to ROS with its respective log2(FC), gene symbol and TAIR description. Gene symbol and TAIR description were taken from The Arabidopsis Information Resource (TAIR)
ROS: response to reactive oxygen species (GO:0000302)
Cluster	geneID	log2(FC)	Gene Symbol	TAIR Description
3 DAS	0	0	0	0
6 DAS	AT1G15520	11.2784	ABCG40	pleiotropic drug resistance 12;(source:Araport11)
6 DAS	AT3G02840	10.1042	AT3G02840	ARM repeat superfamily protein;(source:Araport11)
6 DAS	AT4G23150	8.34214	CRK7	cysteine-rich RLK (RECEPTOR-like protein kinase) 7;(source:Araport11)
6 DAS	AT5G24110	7.62766	WRKY30	WRKY DNA-binding protein 30;(source:Araport11)
6 DAS	AT5G42380	7.08379	CML37	calmodulin like 37;(source:Araport11)
6 DAS	AT1G72520	6.5171	LOX4	PLAT/LH2 domain-containing lipoxygenase family protein;(source:Araport11)
6 DAS	AT1G09080	5.98764	BIP3	Heat shock protein 70 (Hsp 70) family protein;(source:Araport11)
6 DAS	AT1G61120	5.51439	TPS04	terpene synthase 04;(source:Araport11)
6 DAS	AT3G28580	5.4908	AT3G28580	P-loop containing nucleoside triphosphate hydrolases superfamily protein;(source:Araport11)
6 DAS	AT4G25100	5.44982	FSD1	Fe superoxide dismutase 1;(source:Araport11)
6 DAS	AT5G05300	5.29403	AT5G05300	hypothetical protein;(source:Araport11)
6 DAS	AT1G13520	5.12307	AT1G13520	hypothetical protein (DUF1262);(source:Araport11)
6 DAS	AT4G17490	4.88078	ERF6	ethylene responsive element binding factor 6;(source:Araport11)
6 DAS	AT4G11170	4.83498	AT4G11170	Disease resistance protein (TIR-NBS-LRR class) family;(source:Araport11)
6 DAS	AT5G46350	4.5962	WRKY8	WRKY DNA-binding protein 8;(source:Araport11)
6 DAS	AT1G19020	4.45379	AT1G19020	CDP-diacylglycerol-glycerol-3-phosphate 3-phosphatidyltransferase;(source:Araport11)
6 DAS	AT5G24640	3.42695	AT5G24640	hypothetical protein;(source:Araport11)
6 DAS	AT1G16420	3.06181	MC8	metacaspase 8;(source:Araport11)
6 DAS	AT2G41730	2.93422	AT2G41730	calcium-binding site protein;(source:Araport11)
6 DAS	AT3G10930	2.6871	AT3G10930	hypothetical protein;(source:Araport11)
6 DAS	AT4G23810	2.66262	WRKY53	WRKY family transcription factor;(source:Araport11)
6 DAS	AT1G77120	2.37874	ADH1	alcohol dehydrogenase 1;(source:Araport11)
6 DAS	AT3G50310	2.35015	MAPKKK20	mitogen-activated protein kinase kinase kinase 20;(source:Araport11)
6 DAS	AT3G10985	2.34694	SAG20	senescence associated gene 20;(source:Araport11)
6 DAS	AT1G73260	2.29599	KTI1	kunitz trypsin inhibitor 1;(source:Araport11)
6 DAS	AT3G08640	2.10089	AT3G08640	alphavirus core family protein (DUF3411);(source:Araport11)
6 DAS	AT4G23100	1.95873	GSH1	glutamate-cysteine ligase;(source:Araport11)
6 DAS	AT5G55120	1.92869	VTC5	GDP-L-galactose phosphorylase VITAMIN C DEFECTIVE 5 (VTC5);(source:Araport11)
6 DAS	AT5G39610	1.9125	NAC6	NAC domain containing protein 6;(source:Araport11)
6 DAS	AT4G02380	1.8903	SAG21	senescence-associated gene 21;(source:Araport11)
6 DAS	AT4G12720	1.81705	NUDT7	MutT/nudix family protein;(source:Araport11)
6 DAS	AT3G56400	1.60304	WRKY70	WRKY DNA-binding protein 70;(source:Araport11)
6 DAS	AT2G06050	1.57042	OPR3	oxophytodienoate-reductase 3;(source:Araport11)
6 DAS	AT1G05680	1.43068	UGT74E2	Uridine diphosphate glycosyltransferase 74E2;(source:Araport11)
6 DAS	AT3G13610	1.41431	AT3G13610	2-oxoglutarate (2OG) and Fe(II)-dependent oxygenase superfamily protein;(source:Araport11)
6 DAS	AT4G18880	1.39563	HSF A4A	heat shock transcription factor A4A;(source:Araport11)
6 DAS	AT1G08830	1.29816	CSD1	copper/zinc superoxide dismutase 1;(source:Araport11)
6 DAS	AT3G17790	1.26727	PAP17	purple acid phosphatase 17;(source:Araport11)
6 DAS	AT1G34420	1.24488	AT1G34420	leucine-rich repeat transmembrane protein kinase family protein;(source:Araport11)
6 DAS	AT2G17420	1.17223	NTRA	NADPH-dependent thioredoxin reductase A;(source:Araport11)
6 DAS	AT3G17800	1.11948	AT3G17800	alanine-tRNA ligase, putative (DUF760);(source:Araport11)
6 DAS	AT2G29500	1.11284	AT2G29500	HSP20-like chaperones superfamily protein;(source:Araport11)
6 DAS	AT3G56240	1.08835	CCH	copper chaperone;(source:Araport11)
6 DAS	AT3G01420	1.0551	DOX1	Peroxidase superfamily protein;(source:Araport11)
6 DAS	AT4G34890	1.01952	XDH1	xanthine dehydrogenase 1;(source:Araport11)
6 DAS	AT3G07700	0.978291	AT3G07700	Protein kinase superfamily protein;(source:Araport11)
6 DAS	AT5G49570	0.901522	PNG1	peptide-N-glycanase 1;(source:Araport11)
6 DAS	AT3G48090	0.893728	EDS1	alpha/beta-Hydrolases superfamily protein;(source:Araport11)
6 DAS	AT5G37770	0.89342	TCH2	EF hand calcium-binding protein family;(source:Araport11)
6 DAS	AT1G07890	0.864312	APX1	ascorbate peroxidase 1;(source:Araport11)
6 DAS	AT1G20630	0.835737	CAT1	catalase 1;(source:Araport11)
6 DAS	AT5G27600	0.82572	LACS7	long-chain acyl-CoA synthetase 7;(source:Araport11)
6 DAS	AT3G10920	0.617706	MSD1	manganese superoxide dismutase 1;(source:Araport11)
6 DAS	AT4G12570	0.594004	UPL5	ubiquitin protein ligase 5;(source:Araport11)
6 DAS	AT1G34190	0.580526	NAC017	NAC domain containing protein 17;(source:Araport11)
6 DAS	AT3G05970	0.578189	LACS6	long-chain acyl-CoA synthetase 6;(source:Araport11)
6 DAS	AT2G39770	0.573121	CYT1	Glucose-1-phosphate adenylyltransferase family protein;(source:Araport11)
6 DAS	AT1G56560	0.499017	A/N-InvA	Plant neutral invertase family protein;(source:Araport11)
6 DAS	AT4G20380	0.493489	LSD1	LSD1 zinc finger family protein;(source:Araport11)
6 DAS	AT4G08390	0.430781	SAPX	stromal ascorbate peroxidase;(source:Araport11)
6 DAS	AT5G42980	0.316169	TRX3	thioredoxin 3;(source:Araport11)
10 DAS	AT1G15520	5.80837	ABCG40	pleiotropic drug resistance 12;(source:Araport11)
10 DAS	AT4G23150	4.5036	CRK7	cysteine-rich RLK (RECEPTOR-like protein kinase) 7;(source:Araport11)
10 DAS	AT4G25100	4.0258	FSD1	Fe superoxide dismutase 1;(source:Araport11)
10 DAS	AT1G16420	3.65495	MC8	metacaspase 8;(source:Araport11)
10 DAS	AT1G61120	3.53954	TPS04	terpene synthase 04;(source:Araport11)
10 DAS	AT4G21830	3.5284	MSRB7	methionine sulfoxide reductase B7;(source:Araport11)
10 DAS	AT5G46350	3.34693	WRKY8	WRKY DNA-binding protein 8;(source:Araport11)
10 DAS	AT3G02840	3.22364	AT3G02840	ARM repeat superfamily protein;(source:Araport11)
10 DAS	AT1G09080	3.17558	BIP3	Heat shock protein 70 (Hsp 70) family protein;(source:Araport11)
10 DAS	AT4G17490	3.08436	ERF6	ethylene responsive element binding factor 6;(source:Araport11)
10 DAS	AT5G05300	3.01278	AT5G05300	hypothetical protein;(source:Araport11)
10 DAS	AT1G72520	2.99621	LOX4	PLAT/LH2 domain-containing lipoxygenase family protein;(source:Araport11)
10 DAS	AT3G28580	2.88461	AT3G28580	P-loop containing nucleoside triphosphate hydrolases superfamily protein;(source:Araport11)
10 DAS	AT4G23140	2.62052	CRK6	cysteine-rich RLK (RECEPTOR-like protein kinase) 6;(source:Araport11)
10 DAS	AT4G11170	2.60517	AT4G11170	Disease resistance protein (TIR-NBS-LRR class) family;(source:Araport11)
10 DAS	AT1G04580	2.51541	AO4	aldehyde oxidase 4;(source:Araport11)
10 DAS	AT1G73260	2.23048	KTI1	kunitz trypsin inhibitor 1;(source:Araport11)
10 DAS	AT4G02380	2.19054	SAG21	senescence-associated gene 21;(source:Araport11)
10 DAS	AT1G13520	2.17501	AT1G13520	hypothetical protein (DUF1262);(source:Araport11)
10 DAS	AT1G19020	2.07043	AT1G19020	CDP-diacylglycerol-glycerol-3-phosphate 3-phosphatidyltransferase;(source:Araport11)
10 DAS	AT3G10930	2.06572	AT3G10930	hypothetical protein;(source:Araport11)
10 DAS	AT1G66950	2.04593	ABCG39	pleiotropic drug resistance 11;(source:Araport11)
10 DAS	AT5G42380	2.01363	CML37	calmodulin like 37;(source:Araport11)
10 DAS	AT3G56240	1.96222	CCH	copper chaperone;(source:Araport11)
10 DAS	AT3G56400	1.77613	WRKY70	WRKY DNA-binding protein 70;(source:Araport11)
10 DAS	AT2G06050	1.57564	OPR3	oxophytodienoate-reductase 3;(source:Araport11)
10 DAS	AT3G10985	1.56126	SAG20	senescence associated gene 20;(source:Araport11)
10 DAS	AT1G77120	1.48709	ADH1	alcohol dehydrogenase 1;(source:Araport11)
10 DAS	AT3G08640	1.38685	AT3G08640	alphavirus core family protein (DUF3411);(source:Araport11)
10 DAS	AT2G41730	1.36657	AT2G41730	calcium-binding site protein;(source:Araport11)
10 DAS	AT4G26070	1.36431	MEK1	MAP kinase/ ERK kinase 1;(source:Araport11)
10 DAS	AT4G23100	1.35553	GSH1	glutamate-cysteine ligase;(source:Araport11)
10 DAS	AT5G24110	1.31455	WRKY30	WRKY DNA-binding protein 30;(source:Araport11)
10 DAS	AT1G05680	1.31228	UGT74E2	Uridine diphosphate glycosyltransferase 74E2;(source:Araport11)
10 DAS	AT1G52760	1.30269	LysoPL2	lysophospholipase 2;(source:Araport11)
10 DAS	AT5G39610	1.17708	NAC6	NAC domain containing protein 6;(source:Araport11)
10 DAS	AT4G12720	1.16843	NUDT7	MutT/nudix family protein;(source:Araport11)
10 DAS	AT2G17420	1.00981	NTRA	NADPH-dependent thioredoxin reductase A;(source:Araport11)
10 DAS	AT3G01420	1.0076	DOX1	Peroxidase superfamily protein;(source:Araport11)
10 DAS	AT5G10720	0.962698	HK5	histidine kinase 5;(source:Araport11)
10 DAS	AT5G27600	0.949934	LACS7	long-chain acyl-CoA synthetase 7;(source:Araport11)
10 DAS	AT3G02790	0.946977	AT3G02790	zinc finger (C2H2 type) family protein;(source:Araport11)
10 DAS	AT2G40750	0.90936	WRKY54	WRKY DNA-binding protein 54;(source:Araport11)
10 DAS	AT5G49570	0.906863	PNG1	peptide-N-glycanase 1;(source:Araport11)
10 DAS	AT4G34890	0.889944	XDH1	xanthine dehydrogenase 1;(source:Araport11)
10 DAS	AT5G37770	0.879323	TCH2	EF hand calcium-binding protein family;(source:Araport11)
10 DAS	AT5G55120	0.863965	VTC5	GDP-L-galactose phosphorylase VITAMIN C DEFECTIVE 5 (VTC5);(source:Araport11)
10 DAS	AT3G17790	0.847957	PAP17	purple acid phosphatase 17;(source:Araport11)
10 DAS	AT1G08830	0.815834	CSD1	copper/zinc superoxide dismutase 1;(source:Araport11)
10 DAS	AT1G34420	0.77143	AT1G34420	leucine-rich repeat transmembrane protein kinase family protein;(source:Araport11)
10 DAS	AT3G05970	0.770524	LACS6	long-chain acyl-CoA synthetase 6;(source:Araport11)
10 DAS	AT4G00860	0.719973	ATOZI1	monopolar spindle protein (DUF1138);(source:Araport11)
10 DAS	AT2G39770	0.689633	CYT1	Glucose-1-phosphate adenylyltransferase family protein;(source:Araport11)
10 DAS	AT2G43350	0.615021	GPX3	glutathione peroxidase 3;(source:Araport11)
10 DAS	AT1G07890	0.57557	APX1	ascorbate peroxidase 1;(source:Araport11)
10 DAS	AT5G58940	0.557651	CRCK1	calmodulin-binding receptor-like cytoplasmic kinase 1;(source:Araport11)
10 DAS	AT1G19570	0.552456	DHAR1	dehydroascorbate reductase;(source:Araport11)
10 DAS	AT3G10920	0.540812	MSD1	manganese superoxide dismutase 1;(source:Araport11)
10 DAS	AT5G12080	0.49702	MSL10	mechanosensitive channel of small conductance-like 10;(source:Araport11)
10 DAS	AT1G34190	0.466551	NAC017	NAC domain containing protein 17;(source:Araport11)
10 DAS	AT4G08390	0.446142	SAPX	stromal ascorbate peroxidase;(source:Araport11)
10 DAS	AT3G04120	0.336589	GAPC1	glyceraldehyde-3-phosphate dehydrogenase C subunit 1;(source:Araport11)

## Sheet: Indole
Differentially expressed genes (DEGs) assigned to Indole with its respective log2(FC), gene symbol and TAIR description. Gene symbol and TAIR description were taken from The Arabidopsis Information Resource (TAIR)
Indole: indole-containing compound metabolic process (GO:0042430)
Cluster	geneID	log2(FC)	Gene Symbol	TAIR Description
3 DAS	AT2G30770	7.64164	CYP71A13	cytochrome P450 family 71 polypeptide;(source:Araport11)
3 DAS	AT1G56250	5.55305	PP2-B14	phloem protein 2-B14;(source:Araport11)
3 DAS	AT1G56240	5.26766	PP2-B13	phloem protein 2-B13;(source:Araport11)
3 DAS	AT1G21100	4.88013	IGMT1	O-methyltransferase family protein;(source:Araport11)
3 DAS	AT1G21120	4.85755	IGMT2	O-methyltransferase family protein;(source:Araport11)
3 DAS	AT1G26420	4.77748	AT1G26420	FAD-binding Berberine family protein;(source:Araport11)
3 DAS	AT2G15220	4.45563	AT2G15220	Plant basic secretory protein (BSP) family protein;(source:Araport11)
3 DAS	AT3G26830	3.71942	PAD3	Cytochrome P450 superfamily protein;(source:Araport11)
3 DAS	AT2G43000	3.5312	NAC042	NAC domain containing protein 42;(source:Araport11)
3 DAS	AT5G57220	3.42109	CYP81F2	cytochrome P450, family 81, subfamily F, polypeptide 2;(source:Araport11)
3 DAS	AT2G29460	3.06055	GSTU4	glutathione S-transferase tau 4;(source:Araport11)
3 DAS	AT1G51920	3.04227	AT1G51920	transmembrane protein;(source:Araport11)
3 DAS	AT1G53625	3.02855	AT1G53625	hypothetical protein;(source:Araport11)
3 DAS	AT5G03390	2.64534	AT5G03390	hypothetical protein (DUF295);(source:Araport11)
3 DAS	AT1G18570	2.42427	MYB51	myb domain protein 51;(source:Araport11)
3 DAS	AT4G21903	2.34563	AT4G21903	MATE efflux family protein;(source:Araport11)
3 DAS	AT5G41750	2.31194	AT5G41750	Disease resistance protein (TIR-NBS-LRR class) family;(source:Araport11)
3 DAS	AT4G28085	2.1444	AT4G28085	transmembrane protein;(source:Araport11)
3 DAS	AT1G25220	2.09378	ASB1	anthranilate synthase beta subunit 1;(source:Araport11)
3 DAS	AT2G38470	2.06943	WRKY33	WRKY DNA-binding protein 33;(source:Araport11)
3 DAS	AT2G46650	2.04398	CB5-C	cytochrome B5 isoform C;(source:Araport11)
3 DAS	AT3G02800	2.03449	PFA-DSP3	Tyrosine phosphatase family protein;(source:Araport11)
3 DAS	AT1G13520	2.00315	AT1G13520	hypothetical protein (DUF1262);(source:Araport11)
3 DAS	AT5G05730	1.8958	ASA1	anthranilate synthase alpha subunit 1;(source:Araport11)
3 DAS	AT2G24180	1.82578	CYP71B6	cytochrome p450 71b6;(source:Araport11)
3 DAS	AT5G14700	1.73899	AT5G14700	NAD(P)-binding Rossmann-fold superfamily protein;(source:Araport11)
3 DAS	AT4G39950	1.69461	CYP79B2	cytochrome P450, family 79, subfamily B, polypeptide 2;(source:Araport11)
3 DAS	AT3G54640	1.65647	TSA1	tryptophan synthase alpha chain;(source:Araport11)
3 DAS	AT2G23680	1.63054	AT2G23680	Cold acclimation protein WCOR413 family;(source:Araport11)
3 DAS	AT3G29000	1.5546	AT3G29000	Calcium-binding EF-hand family protein;(source:Araport11)
3 DAS	AT1G24145	1.49288	AT1G24145	transmembrane protein;(source:Araport11)
3 DAS	AT1G07135	1.49073	AT1G07135	glycine-rich protein;(source:Araport11)
3 DAS	AT5G54810	1.48083	TSB1	tryptophan synthase beta-subunit 1;(source:Araport11)
3 DAS	AT4G30530	1.47822	GGP1	Class I glutamine amidotransferase-like superfamily protein;(source:Araport11)
3 DAS	AT2G22330	1.44474	CYP79B3	cytochrome P450, family 79, subfamily B, polypeptide 3;(source:Araport11)
3 DAS	AT1G53080	1.30547	AT1G53080	Legume lectin family protein;(source:Araport11)
3 DAS	AT2G04400	1.24182	AT2G04400	Aldolase-type TIM barrel family protein;(source:Araport11)
3 DAS	AT1G17147	1.23466	AT1G17147	VQ motif-containing protein;(source:Araport11)
3 DAS	AT2G32030	1.11176	AT2G32030	Acyl-CoA N-acyltransferases (NAT) superfamily protein;(source:Araport11)
3 DAS	AT5G17990	1.06007	TRP1	tryptophan biosynthesis 1;(source:Araport11)
3 DAS	AT2G40000	0.982867	HSPRO2	ortholog of sugar beet HS1 PRO-1 2;(source:Araport11)
3 DAS	AT5G12930	0.845875	AT5G12930	inactive rhomboid protein;(source:Araport11)
3 DAS	AT3G15720	0.820763	AT3G15720	Pectin lyase-like superfamily protein;(source:Araport11)
3 DAS	AT3G48890	0.781366	MAPR3	membrane-associated progesterone binding protein 3;(source:Araport11)
3 DAS	AT5G25930	0.717043	AT5G25930	kinase family with leucine-rich repeat domain-containing protein;(source:Araport11)
3 DAS	AT4G27070	0.714264	TSB2	tryptophan synthase beta-subunit 2;(source:Araport11)
3 DAS	AT1G53440	0.708057	AT1G53440	Leucine-rich repeat transmembrane protein kinase;(source:Araport11)
3 DAS	AT4G34180	0.69502	AT4G34180	Cyclase family protein;(source:Araport11)
3 DAS	AT3G13310	0.693869	AT3G13310	Chaperone DnaJ-domain superfamily protein;(source:Araport11)
3 DAS	AT1G53430	0.575409	AT1G53430	Leucine-rich repeat transmembrane protein kinase;(source:Araport11)
3 DAS	AT4G31500	0.575279	CYP83B1	cytochrome P450, family 83, subfamily B, polypeptide 1;(source:Araport11)
3 DAS	AT5G44070	0.545657	CAD1	phytochelatin synthase 1 (PCS1);(source:Araport11)
3 DAS	AT1G59870	0.533102	PEN3	ABC-2 and Plant PDR ABC-type transporter family protein;(source:Araport11)
3 DAS	AT3G47800	0.490569	AT3G47800	Galactose mutarotase-like superfamily protein;(source:Araport11)
3 DAS	AT5G44720	0.486913	AT5G44720	Molybdenum cofactor sulfurase family protein;(source:Araport11)
3 DAS	AT3G05290	0.466651	PNC1	peroxisomal adenine nucleotide carrier 1;(source:Araport11)
3 DAS	AT2G46330	0.466133	AGP16	arabinogalactan protein 16;(source:Araport11)
6 DAS	AT2G30770	13.435	CYP71A13	cytochrome P450 family 71 polypeptide;(source:Araport11)
6 DAS	AT1G56250	8.73069	PP2-B14	phloem protein 2-B14;(source:Araport11)
6 DAS	AT1G51920	7.17387	AT1G51920	transmembrane protein;(source:Araport11)
6 DAS	AT1G53625	7.07798	AT1G53625	hypothetical protein;(source:Araport11)
6 DAS	AT1G56240	6.71224	PP2-B13	phloem protein 2-B13;(source:Araport11)
6 DAS	AT1G26420	6.68165	AT1G26420	FAD-binding Berberine family protein;(source:Araport11)
6 DAS	AT3G26830	6.58522	PAD3	Cytochrome P450 superfamily protein;(source:Araport11)
6 DAS	AT5G57220	6.22195	CYP81F2	cytochrome P450, family 81, subfamily F, polypeptide 2;(source:Araport11)
6 DAS	AT2G29460	6.13968	GSTU4	glutathione S-transferase tau 4;(source:Araport11)
6 DAS	AT2G43000	5.70062	NAC042	NAC domain containing protein 42;(source:Araport11)
6 DAS	AT2G15220	5.50449	AT2G15220	Plant basic secretory protein (BSP) family protein;(source:Araport11)
6 DAS	AT1G21120	5.49097	IGMT2	O-methyltransferase family protein;(source:Araport11)
6 DAS	AT5G41750	5.46796	AT5G41750	Disease resistance protein (TIR-NBS-LRR class) family;(source:Araport11)
6 DAS	AT4G39950	5.38154	CYP79B2	cytochrome P450, family 79, subfamily B, polypeptide 2;(source:Araport11)
6 DAS	AT3G29000	5.33562	AT3G29000	Calcium-binding EF-hand family protein;(source:Araport11)
6 DAS	AT1G21100	5.32852	IGMT1	O-methyltransferase family protein;(source:Araport11)
6 DAS	AT1G13520	5.12307	AT1G13520	hypothetical protein (DUF1262);(source:Araport11)
6 DAS	AT5G14700	4.93891	AT5G14700	NAD(P)-binding Rossmann-fold superfamily protein;(source:Araport11)
6 DAS	AT2G24180	4.60778	CYP71B6	cytochrome p450 71b6;(source:Araport11)
6 DAS	AT2G18690	4.59583	AT2G18690	transmembrane protein;(source:Araport11)
6 DAS	AT1G25220	4.55889	ASB1	anthranilate synthase beta subunit 1;(source:Araport11)
6 DAS	AT5G05730	4.55101	ASA1	anthranilate synthase alpha subunit 1;(source:Araport11)
6 DAS	AT3G54640	4.40226	TSA1	tryptophan synthase alpha chain;(source:Araport11)
6 DAS	AT1G24145	4.39608	AT1G24145	transmembrane protein;(source:Araport11)
6 DAS	AT2G38470	4.27035	WRKY33	WRKY DNA-binding protein 33;(source:Araport11)
6 DAS	AT1G07135	4.15696	AT1G07135	glycine-rich protein;(source:Araport11)
6 DAS	AT1G53080	4.15188	AT1G53080	Legume lectin family protein;(source:Araport11)
6 DAS	AT2G22330	4.13265	CYP79B3	cytochrome P450, family 79, subfamily B, polypeptide 3;(source:Araport11)
6 DAS	AT2G46650	4.09788	CB5-C	cytochrome B5 isoform C;(source:Araport11)
6 DAS	AT2G32030	4.0885	AT2G32030	Acyl-CoA N-acyltransferases (NAT) superfamily protein;(source:Araport11)
6 DAS	AT5G12930	3.84654	AT5G12930	inactive rhomboid protein;(source:Araport11)
6 DAS	AT5G17990	3.84417	TRP1	tryptophan biosynthesis 1;(source:Araport11)
6 DAS	AT5G03390	3.8363	AT5G03390	hypothetical protein (DUF295);(source:Araport11)
6 DAS	AT1G18570	3.81724	MYB51	myb domain protein 51;(source:Araport11)
6 DAS	AT5G25930	3.73941	AT5G25930	kinase family with leucine-rich repeat domain-containing protein;(source:Araport11)
6 DAS	AT4G27070	3.71223	TSB2	tryptophan synthase beta-subunit 2;(source:Araport11)
6 DAS	AT3G57460	3.68501	AT3G57460	catalytic/ metal ion binding / metalloendopeptidase/ zinc ion binding protein;(source:Araport11)
6 DAS	AT3G55840	3.58188	AT3G55840	Hs1pro-1 protein;(source:Araport11)
6 DAS	AT5G48657	3.51129	AT5G48657	defense protein-like protein;(source:Araport11)
6 DAS	AT2G04400	3.50142	AT2G04400	Aldolase-type TIM barrel family protein;(source:Araport11)
6 DAS	AT4G28085	3.498	AT4G28085	transmembrane protein;(source:Araport11)
6 DAS	AT5G54810	3.45135	TSB1	tryptophan synthase beta-subunit 1;(source:Araport11)
6 DAS	AT3G02800	3.44212	PFA-DSP3	Tyrosine phosphatase family protein;(source:Araport11)
6 DAS	AT1G76640	3.39999	AT1G76640	Calcium-binding EF-hand family protein;(source:Araport11)
6 DAS	AT4G30530	3.37866	GGP1	Class I glutamine amidotransferase-like superfamily protein;(source:Araport11)
6 DAS	AT4G30230	3.35855	AT4G30230	hypothetical protein;(source:Araport11)
6 DAS	AT5G53990	3.21231	AT5G53990	UDP-Glycosyltransferase superfamily protein;(source:Araport11)
6 DAS	AT2G20562	3.0646	AT2G20562	taximin;(source:Araport11)
6 DAS	AT2G04515	3.00718	AT2G04515	transmembrane protein;(source:Araport11)
6 DAS	AT4G01895	2.90765	AT4G01895	systemic acquired resistance (SAR) regulator protein NIMIN-1-like protein;(source:Araport11)
6 DAS	AT1G44542	2.84712	AT1G44542	Cyclase family protein;(source:Araport11)
6 DAS	AT2G20142	2.80666	AT2G20142	Toll-Interleukin-Resistance (TIR) domain family protein;(source:Araport11)
6 DAS	AT4G31500	2.7368	CYP83B1	cytochrome P450, family 83, subfamily B, polypeptide 1;(source:Araport11)
6 DAS	AT3G48890	2.72903	MAPR3	membrane-associated progesterone binding protein 3;(source:Araport11)
6 DAS	AT4G15236	2.49085	ABCG43	ABC-2 and Plant PDR ABC-type transporter family protein;(source:Araport11)
6 DAS	AT1G11050	2.48087	AT1G11050	Protein kinase superfamily protein;(source:Araport11)
6 DAS	AT2G23680	2.47268	AT2G23680	Cold acclimation protein WCOR413 family;(source:Araport11)
6 DAS	AT4G21903	2.44268	AT4G21903	MATE efflux family protein;(source:Araport11)
6 DAS	AT4G34410	2.41111	RRTF1	redox responsive transcription factor 1;(source:Araport11)
6 DAS	AT5G59530	2.40573	AT5G59530	2-oxoglutarate (2OG) and Fe(II)-dependent oxygenase superfamily protein;(source:Araport11)
6 DAS	AT2G20610	2.36012	SUR1	Tyrosine transaminase family protein;(source:Araport11)
6 DAS	AT3G44300	2.30373	NIT2	nitrilase 2;(source:Araport11)
6 DAS	AT1G80300	2.22696	NTT1	nucleotide transporter 1;(source:Araport11)
6 DAS	AT5G44720	2.14798	AT5G44720	Molybdenum cofactor sulfurase family protein;(source:Araport11)
6 DAS	AT4G34180	2.10743	AT4G34180	Cyclase family protein;(source:Araport11)
6 DAS	AT5G41680	2.10636	AT5G41680	Protein kinase superfamily protein;(source:Araport11)
6 DAS	AT4G05010	1.96408	FBS3	F-box family protein;(source:Araport11)
6 DAS	AT4G23100	1.95873	GSH1	glutamate-cysteine ligase;(source:Araport11)
6 DAS	AT3G22240	1.91825	AT3G22240	cysteine-rich/transmembrane domain PCC1-like protein;(source:Araport11)
6 DAS	AT1G53430	1.87932	AT1G53430	Leucine-rich repeat transmembrane protein kinase;(source:Araport11)
6 DAS	AT3G13310	1.78026	AT3G13310	Chaperone DnaJ-domain superfamily protein;(source:Araport11)
6 DAS	AT5G05590	1.76852	PAI2	phosphoribosylanthranilate isomerase 2;(source:Araport11)
6 DAS	AT1G54020	1.74333	AT1G54020	GDSL-like Lipase/Acylhydrolase superfamily protein;(source:Araport11)
6 DAS	AT1G73500	1.66806	MKK9	MAP kinase kinase 9;(source:Araport11)
6 DAS	AT2G40000	1.64749	HSPRO2	ortholog of sugar beet HS1 PRO-1 2;(source:Araport11)
6 DAS	AT3G56400	1.60304	WRKY70	WRKY DNA-binding protein 70;(source:Araport11)
6 DAS	AT3G52430	1.57359	PAD4	alpha/beta-Hydrolases superfamily protein;(source:Araport11)
6 DAS	AT1G06620	1.54953	AT1G06620	2-oxoglutarate (2OG) and Fe(II)-dependent oxygenase superfamily protein;(source:Araport11)
6 DAS	AT4G27260	1.54802	WES1	Auxin-responsive GH3 family protein;(source:Araport11)
6 DAS	AT2G39650	1.5312	AT2G39650	cruciferin (DUF506);(source:Araport11)
6 DAS	AT4G34630	1.51188	AT4G34630	prostatic spermine-binding-like protein;(source:Araport11)
6 DAS	AT5G27520	1.48199	PNC2	peroxisomal adenine nucleotide carrier 2;(source:Araport11)
6 DAS	AT2G44790	1.44908	UCC2	uclacyanin 2;(source:Araport11)
6 DAS	AT1G05680	1.43068	UGT74E2	Uridine diphosphate glycosyltransferase 74E2;(source:Araport11)
6 DAS	AT1G59870	1.42818	PEN3	ABC-2 and Plant PDR ABC-type transporter family protein;(source:Araport11)
6 DAS	AT1G06840	1.42431	AT1G06840	Leucine-rich repeat protein kinase family protein;(source:Araport11)
6 DAS	AT3G28940	1.36286	AT3G28940	AIG2-like (avirulence induced gene) family protein;(source:Araport11)
6 DAS	AT4G23850	1.3609	LACS4	AMP-dependent synthetase and ligase family protein;(source:Araport11)
6 DAS	AT4G38550	1.35624	AT4G38550	phospholipase-like protein (PEARLI 4) family protein;(source:Araport11)
6 DAS	AT3G47800	1.3558	AT3G47800	Galactose mutarotase-like superfamily protein;(source:Araport11)
6 DAS	AT1G17147	1.35047	AT1G17147	VQ motif-containing protein;(source:Araport11)
6 DAS	AT3G45640	1.30694	MPK3	mitogen-activated protein kinase 3;(source:Araport11)
6 DAS	AT5G26600	1.24522	AT5G26600	Pyridoxal phosphate (PLP)-dependent transferases superfamily protein;(source:Araport11)
6 DAS	AT5G44070	1.14877	CAD1	phytochelatin synthase 1 (PCS1);(source:Araport11)
6 DAS	AT2G46330	1.14189	AGP16	arabinogalactan protein 16;(source:Araport11)
6 DAS	AT1G52000	1.13977	AT1G52000	Mannose-binding lectin superfamily protein;(source:Araport11)
6 DAS	AT5G13550	1.138	SULTR4;1	sulfate transporter 4.1;(source:Araport11)
6 DAS	AT3G62580	1.11046	AT3G62580	Late embryogenesis abundant protein (LEA) family protein;(source:Araport11)
6 DAS	AT1G27130	1.09006	GSTU13	glutathione S-transferase tau 13;(source:Araport11)
6 DAS	AT1G23850	1.04231	AT1G23850	transmembrane protein;(source:Araport11)
6 DAS	AT1G53440	1.03489	AT1G53440	Leucine-rich repeat transmembrane protein kinase;(source:Araport11)
6 DAS	AT2G46140	1.03148	AT2G46140	Late embryogenesis abundant protein;(source:Araport11)
6 DAS	AT1G32640	1.02937	MYC2	Basic helix-loop-helix (bHLH) DNA-binding family protein;(source:Araport11)
6 DAS	AT4G37400	1.00894	CYP81F3	cytochrome P450, family 81, subfamily F, polypeptide 3;(source:Araport11)
6 DAS	AT1G80110	1.00379	PP2-B11	phloem protein 2-B11;(source:Araport11)
6 DAS	AT2G44490	0.996316	PEN2	Glycosyl hydrolase superfamily protein;(source:Araport11)
6 DAS	AT1G69370	0.863364	CM3	chorismate mutase 3;(source:Araport11)
6 DAS	AT5G54160	0.737932	OMT1	O-methyltransferase 1;(source:Araport11)
6 DAS	AT1G77420	0.70553	AT1G77420	alpha/beta-Hydrolases superfamily protein;(source:Araport11)
6 DAS	AT1G53390	0.700415	ABCG24	P-loop containing nucleoside triphosphate hydrolases superfamily protein;(source:Araport11)
6 DAS	AT1G80360	0.618794	AT1G80360	Pyridoxal phosphate (PLP)-dependent transferases superfamily protein;(source:Araport11)
6 DAS	AT3G44310	0.603458	NIT1	nitrilase 1;(source:Araport11)
6 DAS	AT5G38530	0.580156	TSBtype2	tryptophan synthase beta type 2;(source:Araport11)
10 DAS	AT2G30770	6.82161	CYP71A13	cytochrome P450 family 71 polypeptide;(source:Araport11)
10 DAS	AT3G26830	5.49576	PAD3	Cytochrome P450 superfamily protein;(source:Araport11)
10 DAS	AT2G29460	5.17441	GSTU4	glutathione S-transferase tau 4;(source:Araport11)
10 DAS	AT5G14700	4.16607	AT5G14700	NAD(P)-binding Rossmann-fold superfamily protein;(source:Araport11)
10 DAS	AT4G39950	4.10713	CYP79B2	cytochrome P450, family 79, subfamily B, polypeptide 2;(source:Araport11)
10 DAS	AT4G28085	3.62387	AT4G28085	transmembrane protein;(source:Araport11)
10 DAS	AT1G56250	3.51741	PP2-B14	phloem protein 2-B14;(source:Araport11)
10 DAS	AT1G56240	3.25419	PP2-B13	phloem protein 2-B13;(source:Araport11)
10 DAS	AT2G46650	3.12822	CB5-C	cytochrome B5 isoform C;(source:Araport11)
10 DAS	AT5G05730	3.12498	ASA1	anthranilate synthase alpha subunit 1;(source:Araport11)
10 DAS	AT1G44542	3.07715	AT1G44542	Cyclase family protein;(source:Araport11)
10 DAS	AT4G30230	3.03501	AT4G30230	hypothetical protein;(source:Araport11)
10 DAS	AT1G25220	2.94741	ASB1	anthranilate synthase beta subunit 1;(source:Araport11)
10 DAS	AT1G06620	2.88026	AT1G06620	2-oxoglutarate (2OG) and Fe(II)-dependent oxygenase superfamily protein;(source:Araport11)
10 DAS	AT3G44300	2.87475	NIT2	nitrilase 2;(source:Araport11)
10 DAS	AT2G15220	2.86131	AT2G15220	Plant basic secretory protein (BSP) family protein;(source:Araport11)
10 DAS	AT1G54020	2.84996	AT1G54020	GDSL-like Lipase/Acylhydrolase superfamily protein;(source:Araport11)
10 DAS	AT3G54640	2.84569	TSA1	tryptophan synthase alpha chain;(source:Araport11)
10 DAS	AT3G55840	2.78866	AT3G55840	Hs1pro-1 protein;(source:Araport11)
10 DAS	AT2G24180	2.74086	CYP71B6	cytochrome p450 71b6;(source:Araport11)
10 DAS	AT4G27070	2.69679	TSB2	tryptophan synthase beta-subunit 2;(source:Araport11)
10 DAS	AT2G22330	2.57704	CYP79B3	cytochrome P450, family 79, subfamily B, polypeptide 3;(source:Araport11)
10 DAS	AT1G76640	2.56398	AT1G76640	Calcium-binding EF-hand family protein;(source:Araport11)
10 DAS	AT3G57460	2.54301	AT3G57460	catalytic/ metal ion binding / metalloendopeptidase/ zinc ion binding protein;(source:Araport11)
10 DAS	AT5G17990	2.54007	TRP1	tryptophan biosynthesis 1;(source:Araport11)
10 DAS	AT1G07135	2.53533	AT1G07135	glycine-rich protein;(source:Araport11)
10 DAS	AT3G29000	2.45819	AT3G29000	Calcium-binding EF-hand family protein;(source:Araport11)
10 DAS	AT4G01895	2.44946	AT4G01895	systemic acquired resistance (SAR) regulator protein NIMIN-1-like protein;(source:Araport11)
10 DAS	AT2G20562	2.41193	AT2G20562	taximin;(source:Araport11)
10 DAS	AT5G12930	2.39078	AT5G12930	inactive rhomboid protein;(source:Araport11)
10 DAS	AT4G29690	2.38133	AT4G29690	Alkaline-phosphatase-like family protein;(source:Araport11)
10 DAS	AT5G40210	2.37783	UMAMIT42	nodulin MtN21 /EamA-like transporter family protein;(source:Araport11)
10 DAS	AT3G02800	2.3051	PFA-DSP3	Tyrosine phosphatase family protein;(source:Araport11)
10 DAS	AT5G03390	2.29891	AT5G03390	hypothetical protein (DUF295);(source:Araport11)
10 DAS	AT5G54810	2.28606	TSB1	tryptophan synthase beta-subunit 1;(source:Araport11)
10 DAS	AT2G04400	2.25135	AT2G04400	Aldolase-type TIM barrel family protein;(source:Araport11)
10 DAS	AT5G41750	2.20655	AT5G41750	Disease resistance protein (TIR-NBS-LRR class) family;(source:Araport11)
10 DAS	AT1G13520	2.17501	AT1G13520	hypothetical protein (DUF1262);(source:Araport11)
10 DAS	AT4G37430	2.14779	CYP91A2	cytochrome P450, family 91, subfamily A, polypeptide 2;(source:Araport11)
10 DAS	AT5G48657	2.08116	AT5G48657	defense protein-like protein;(source:Araport11)
10 DAS	AT1G53625	2.07556	AT1G53625	hypothetical protein;(source:Araport11)
10 DAS	AT1G51920	1.97706	AT1G51920	transmembrane protein;(source:Araport11)
10 DAS	AT1G24145	1.92941	AT1G24145	transmembrane protein;(source:Araport11)
10 DAS	AT1G26420	1.91339	AT1G26420	FAD-binding Berberine family protein;(source:Araport11)
10 DAS	AT4G34630	1.89865	AT4G34630	prostatic spermine-binding-like protein;(source:Araport11)
10 DAS	AT3G48890	1.86993	MAPR3	membrane-associated progesterone binding protein 3;(source:Araport11)
10 DAS	AT4G30530	1.86104	GGP1	Class I glutamine amidotransferase-like superfamily protein;(source:Araport11)
10 DAS	AT2G32030	1.85916	AT2G32030	Acyl-CoA N-acyltransferases (NAT) superfamily protein;(source:Araport11)
10 DAS	AT4G15236	1.82961	ABCG43	ABC-2 and Plant PDR ABC-type transporter family protein;(source:Araport11)
10 DAS	AT1G73500	1.82857	MKK9	MAP kinase kinase 9;(source:Araport11)
10 DAS	AT3G25882	1.8088	NIMIN-2	NIM1-interacting 2;(source:Araport11)
10 DAS	AT3G56400	1.77613	WRKY70	WRKY DNA-binding protein 70;(source:Araport11)
10 DAS	AT4G05010	1.75407	FBS3	F-box family protein;(source:Araport11)
10 DAS	AT5G44720	1.7529	AT5G44720	Molybdenum cofactor sulfurase family protein;(source:Araport11)
10 DAS	AT5G25930	1.73994	AT5G25930	kinase family with leucine-rich repeat domain-containing protein;(source:Araport11)
10 DAS	AT4G34180	1.69122	AT4G34180	Cyclase family protein;(source:Araport11)
10 DAS	AT1G53080	1.66795	AT1G53080	Legume lectin family protein;(source:Araport11)
10 DAS	AT1G80300	1.66423	NTT1	nucleotide transporter 1;(source:Araport11)
10 DAS	AT2G20610	1.63883	SUR1	Tyrosine transaminase family protein;(source:Araport11)
10 DAS	AT4G37400	1.63314	CYP81F3	cytochrome P450, family 81, subfamily F, polypeptide 3;(source:Araport11)
10 DAS	AT2G38470	1.6208	WRKY33	WRKY DNA-binding protein 33;(source:Araport11)
10 DAS	AT2G44790	1.61351	UCC2	uclacyanin 2;(source:Araport11)
10 DAS	AT1G52000	1.60013	AT1G52000	Mannose-binding lectin superfamily protein;(source:Araport11)
10 DAS	AT2G43000	1.56061	NAC042	NAC domain containing protein 42;(source:Araport11)
10 DAS	AT2G18690	1.47465	AT2G18690	transmembrane protein;(source:Araport11)
10 DAS	AT2G23680	1.47433	AT2G23680	Cold acclimation protein WCOR413 family;(source:Araport11)
10 DAS	AT1G18570	1.47025	MYB51	myb domain protein 51;(source:Araport11)
10 DAS	AT2G46140	1.45248	AT2G46140	Late embryogenesis abundant protein;(source:Araport11)
10 DAS	AT3G52430	1.40191	PAD4	alpha/beta-Hydrolases superfamily protein;(source:Araport11)
10 DAS	AT2G20142	1.39793	AT2G20142	Toll-Interleukin-Resistance (TIR) domain family protein;(source:Araport11)
10 DAS	AT4G31500	1.39646	CYP83B1	cytochrome P450, family 83, subfamily B, polypeptide 1;(source:Araport11)
10 DAS	AT4G23100	1.35553	GSH1	glutamate-cysteine ligase;(source:Araport11)
10 DAS	AT1G05680	1.31228	UGT74E2	Uridine diphosphate glycosyltransferase 74E2;(source:Araport11)
10 DAS	AT2G46330	1.27504	AGP16	arabinogalactan protein 16;(source:Araport11)
10 DAS	AT5G27520	1.23133	PNC2	peroxisomal adenine nucleotide carrier 2;(source:Araport11)
10 DAS	AT3G62580	1.21974	AT3G62580	Late embryogenesis abundant protein (LEA) family protein;(source:Araport11)
10 DAS	AT5G53990	1.16706	AT5G53990	UDP-Glycosyltransferase superfamily protein;(source:Araport11)
10 DAS	AT1G55210	1.15789	AT1G55210	Disease resistance-responsive (dirigent-like protein) family protein;(source:Araport11)
10 DAS	AT5G05590	1.14875	PAI2	phosphoribosylanthranilate isomerase 2;(source:Araport11)
10 DAS	AT3G44310	1.1478	NIT1	nitrilase 1;(source:Araport11)
10 DAS	AT1G11050	1.14491	AT1G11050	Protein kinase superfamily protein;(source:Araport11)
10 DAS	AT5G54160	1.11798	OMT1	O-methyltransferase 1;(source:Araport11)
10 DAS	AT1G54000	1.0984	GLL22	GDSL-like Lipase/Acylhydrolase superfamily protein;(source:Araport11)
10 DAS	AT4G14430	1.07757	IBR10	indole-3-butyric acid response 10;(source:Araport11)
10 DAS	AT5G41680	1.06658	AT5G41680	Protein kinase superfamily protein;(source:Araport11)
10 DAS	AT1G80110	0.994638	PP2-B11	phloem protein 2-B11;(source:Araport11)
10 DAS	AT5G38530	0.980975	TSBtype2	tryptophan synthase beta type 2;(source:Araport11)
10 DAS	AT1G17147	0.969265	AT1G17147	VQ motif-containing protein;(source:Araport11)
10 DAS	AT3G28940	0.943982	AT3G28940	AIG2-like (avirulence induced gene) family protein;(source:Araport11)
10 DAS	AT3G47800	0.943222	AT3G47800	Galactose mutarotase-like superfamily protein;(source:Araport11)
10 DAS	AT1G54010	0.906244	AT1G54010	GDSL-like Lipase/Acylhydrolase superfamily protein;(source:Araport11)
10 DAS	AT5G13550	0.890238	SULTR4;1	sulfate transporter 4.1;(source:Araport11)
10 DAS	AT1G23850	0.85219	AT1G23850	transmembrane protein;(source:Araport11)
10 DAS	AT1G59870	0.838681	PEN3	ABC-2 and Plant PDR ABC-type transporter family protein;(source:Araport11)
10 DAS	AT2G03980	0.805113	AT2G03980	GDSL-like Lipase/Acylhydrolase superfamily protein;(source:Araport11)
10 DAS	AT5G26600	0.785268	AT5G26600	Pyridoxal phosphate (PLP)-dependent transferases superfamily protein;(source:Araport11)
10 DAS	AT1G80360	0.779567	AT1G80360	Pyridoxal phosphate (PLP)-dependent transferases superfamily protein;(source:Araport11)
10 DAS	AT2G39650	0.753736	AT2G39650	cruciferin (DUF506);(source:Araport11)
10 DAS	AT1G53430	0.747298	AT1G53430	Leucine-rich repeat transmembrane protein kinase;(source:Araport11)
10 DAS	AT4G38550	0.743767	AT4G38550	phospholipase-like protein (PEARLI 4) family protein;(source:Araport11)
10 DAS	AT4G23850	0.724421	LACS4	AMP-dependent synthetase and ligase family protein;(source:Araport11)
10 DAS	AT1G06840	0.72118	AT1G06840	Leucine-rich repeat protein kinase family protein;(source:Araport11)
10 DAS	AT5G44070	0.71748	CAD1	phytochelatin synthase 1 (PCS1);(source:Araport11)
10 DAS	AT1G53440	0.692054	AT1G53440	Leucine-rich repeat transmembrane protein kinase;(source:Araport11)
10 DAS	AT3G45640	0.679979	MPK3	mitogen-activated protein kinase 3;(source:Araport11)
10 DAS	AT1G32640	0.676227	MYC2	Basic helix-loop-helix (bHLH) DNA-binding family protein;(source:Araport11)
10 DAS	AT4G27260	0.668863	WES1	Auxin-responsive GH3 family protein;(source:Araport11)
10 DAS	AT1G77420	0.597086	AT1G77420	alpha/beta-Hydrolases superfamily protein;(source:Araport11)
10 DAS	AT1G53390	0.577469	ABCG24	P-loop containing nucleoside triphosphate hydrolases superfamily protein;(source:Araport11)
10 DAS	AT4G21903	0.57707	AT4G21903	MATE efflux family protein;(source:Araport11)
10 DAS	AT4G05530	0.521017	IBR1	indole-3-butyric acid response 1;(source:Araport11)
10 DAS	AT4G35220	0.518784	AT4G35220	Cyclase family protein;(source:Araport11)
10 DAS	AT2G30840	0.490379	AT2G30840	2-oxoglutarate (2OG) and Fe(II)-dependent oxygenase superfamily protein;(source:Araport11)
10 DAS	AT5G43745	0.416761	AT5G43745	ion channel POLLUX-like protein, putative (DUF1012);(source:Araport11)
10 DAS	AT1G69370	0.37197	CM3	chorismate mutase 3;(source:Araport11)

## Sheet: Phytoalexin
Differentially expressed genes (DEGs) assigned to Phytoalexin with its respective log2(FC), gene symbol and TAIR description. Gene symbol and TAIR description were taken from The Arabidopsis Information Resource (TAIR)
Phytoalexin: phytoalexin biosynthetic process (GO:0052315)
Cluster	geneID	log2(FC)	Gene Symbol	TAIR Description
3 DAS	AT2G30770	7.64164	CYP71A13	cytochrome P450 family 71 polypeptide;(source:Araport11)
3 DAS	AT1G56250	5.55305	PP2-B14	phloem protein 2-B14;(source:Araport11)
3 DAS	AT3G26830	3.71942	PAD3	Cytochrome P450 superfamily protein;(source:Araport11)
3 DAS	AT2G43000	3.5312	NAC042	NAC domain containing protein 42;(source:Araport11)
3 DAS	AT2G29460	3.06055	GSTU4	glutathione S-transferase tau 4;(source:Araport11)
3 DAS	AT5G41750	2.31194	AT5G41750	Disease resistance protein (TIR-NBS-LRR class) family;(source:Araport11)
3 DAS	AT2G38470	2.06943	WRKY33	WRKY DNA-binding protein 33;(source:Araport11)
3 DAS	AT1G13520	2.00315	AT1G13520	hypothetical protein (DUF1262);(source:Araport11)
3 DAS	AT4G39950	1.69461	CYP79B2	cytochrome P450, family 79, subfamily B, polypeptide 2;(source:Araport11)
3 DAS	AT4G30530	1.47822	GGP1	Class I glutamine amidotransferase-like superfamily protein;(source:Araport11)
3 DAS	AT2G22330	1.44474	CYP79B3	cytochrome P450, family 79, subfamily B, polypeptide 3;(source:Araport11)
6 DAS	AT2G30770	13.435	CYP71A13	cytochrome P450 family 71 polypeptide;(source:Araport11)
6 DAS	AT1G56250	8.73069	PP2-B14	phloem protein 2-B14;(source:Araport11)
6 DAS	AT3G26830	6.58522	PAD3	Cytochrome P450 superfamily protein;(source:Araport11)
6 DAS	AT2G29460	6.13968	GSTU4	glutathione S-transferase tau 4;(source:Araport11)
6 DAS	AT2G43000	5.70062	NAC042	NAC domain containing protein 42;(source:Araport11)
6 DAS	AT5G41750	5.46796	AT5G41750	Disease resistance protein (TIR-NBS-LRR class) family;(source:Araport11)
6 DAS	AT4G39950	5.38154	CYP79B2	cytochrome P450, family 79, subfamily B, polypeptide 2;(source:Araport11)
6 DAS	AT1G13520	5.12307	AT1G13520	hypothetical protein (DUF1262);(source:Araport11)
6 DAS	AT2G18690	4.59583	AT2G18690	transmembrane protein;(source:Araport11)
6 DAS	AT2G38470	4.27035	WRKY33	WRKY DNA-binding protein 33;(source:Araport11)
6 DAS	AT2G22330	4.13265	CYP79B3	cytochrome P450, family 79, subfamily B, polypeptide 3;(source:Araport11)
6 DAS	AT4G30530	3.37866	GGP1	Class I glutamine amidotransferase-like superfamily protein;(source:Araport11)
6 DAS	AT4G23100	1.95873	GSH1	glutamate-cysteine ligase;(source:Araport11)
6 DAS	AT1G73500	1.66806	MKK9	MAP kinase kinase 9;(source:Araport11)
6 DAS	AT3G56400	1.60304	WRKY70	WRKY DNA-binding protein 70;(source:Araport11)
6 DAS	AT3G52430	1.57359	PAD4	alpha/beta-Hydrolases superfamily protein;(source:Araport11)
6 DAS	AT4G27260	1.54802	WES1	Auxin-responsive GH3 family protein;(source:Araport11)
6 DAS	AT3G28940	1.36286	AT3G28940	AIG2-like (avirulence induced gene) family protein;(source:Araport11)
6 DAS	AT3G45640	1.30694	MPK3	mitogen-activated protein kinase 3;(source:Araport11)
6 DAS	AT1G53390	0.700415	ABCG24	P-loop containing nucleoside triphosphate hydrolases superfamily protein;(source:Araport11)
10 DAS	AT2G30770	6.82161	CYP71A13	cytochrome P450 family 71 polypeptide;(source:Araport11)
10 DAS	AT3G26830	5.49576	PAD3	Cytochrome P450 superfamily protein;(source:Araport11)
10 DAS	AT2G29460	5.17441	GSTU4	glutathione S-transferase tau 4;(source:Araport11)
10 DAS	AT4G39950	4.10713	CYP79B2	cytochrome P450, family 79, subfamily B, polypeptide 2;(source:Araport11)
10 DAS	AT1G56250	3.51741	PP2-B14	phloem protein 2-B14;(source:Araport11)
10 DAS	AT2G22330	2.57704	CYP79B3	cytochrome P450, family 79, subfamily B, polypeptide 3;(source:Araport11)
10 DAS	AT5G41750	2.20655	AT5G41750	Disease resistance protein (TIR-NBS-LRR class) family;(source:Araport11)
10 DAS	AT1G13520	2.17501	AT1G13520	hypothetical protein (DUF1262);(source:Araport11)
10 DAS	AT4G30530	1.86104	GGP1	Class I glutamine amidotransferase-like superfamily protein;(source:Araport11)
10 DAS	AT1G73500	1.82857	MKK9	MAP kinase kinase 9;(source:Araport11)
10 DAS	AT3G56400	1.77613	WRKY70	WRKY DNA-binding protein 70;(source:Araport11)
10 DAS	AT2G38470	1.6208	WRKY33	WRKY DNA-binding protein 33;(source:Araport11)
10 DAS	AT2G43000	1.56061	NAC042	NAC domain containing protein 42;(source:Araport11)
10 DAS	AT2G18690	1.47465	AT2G18690	transmembrane protein;(source:Araport11)
10 DAS	AT3G52430	1.40191	PAD4	alpha/beta-Hydrolases superfamily protein;(source:Araport11)
10 DAS	AT4G23100	1.35553	GSH1	glutamate-cysteine ligase;(source:Araport11)
10 DAS	AT3G28940	0.943982	AT3G28940	AIG2-like (avirulence induced gene) family protein;(source:Araport11)
10 DAS	AT3G45640	0.679979	MPK3	mitogen-activated protein kinase 3;(source:Araport11)
10 DAS	AT4G27260	0.668863	WES1	Auxin-responsive GH3 family protein;(source:Araport11)
10 DAS	AT1G53390	0.577469	ABCG24	P-loop containing nucleoside triphosphate hydrolases superfamily protein;(source:Araport11)

## Sheet: GSL
Differentially expressed genes (DEGs) assigned to GSL with its respective log2(FC), gene symbol and TAIR description. Gene symbol and TAIR description were taken from The Arabidopsis Information Resource (TAIR)
GSL: glucosinolate biosynthetic process (GO:0019761)
Cluster	geneID	log2(FC)	Gene Symbol	TAIR Description
3 DAS	AT5G57220	3.42109	CYP81F2	cytochrome P450, family 81, subfamily F, polypeptide 2;(source:Araport11)
3 DAS	AT1G18570	2.42427	MYB51	myb domain protein 51;(source:Araport11)
3 DAS	AT5G07690	1.78451	MYB29	myb domain protein 29;(source:Araport11)
3 DAS	AT2G22330	1.44474	CYP79B3	cytochrome P450, family 79, subfamily B, polypeptide 3;(source:Araport11)
3 DAS	AT1G16410	1.43811	CYP79F1	cytochrome p450 79f1;(source:Araport11)
3 DAS	AT4G39940	1.33989	AKN2	APS-kinase 2;(source:Araport11)
3 DAS	AT1G18590	0.897536	SOT17	sulfotransferase 17;(source:Araport11)
3 DAS	AT4G31500	0.575279	CYP83B1	cytochrome P450, family 83, subfamily B, polypeptide 1;(source:Araport11)
3 DAS	AT1G74100	0.498838	SOT16	sulfotransferase 16;(source:Araport11)
3 DAS	AT2G14750	0.482853	APK	APS kinase;(source:Araport11)
3 DAS	AT1G24100	0.399177	UGT74B1	UDP-glucosyl transferase 74B1;(source:Araport11)
6 DAS	AT5G57220	6.22195	CYP81F2	cytochrome P450, family 81, subfamily F, polypeptide 2;(source:Araport11)
6 DAS	AT1G18590	4.74982	SOT17	sulfotransferase 17;(source:Araport11)
6 DAS	AT2G22330	4.13265	CYP79B3	cytochrome P450, family 79, subfamily B, polypeptide 3;(source:Araport11)
6 DAS	AT4G39940	3.90927	AKN2	APS-kinase 2;(source:Araport11)
6 DAS	AT1G18570	3.81724	MYB51	myb domain protein 51;(source:Araport11)
6 DAS	AT1G65860	3.7808	FMO GS-OX1	flavin-monooxygenase glucosinolate S-oxygenase 1;(source:Araport11)
6 DAS	AT1G74100	3.27466	SOT16	sulfotransferase 16;(source:Araport11)
6 DAS	AT1G24100	3.01966	UGT74B1	UDP-glucosyl transferase 74B1;(source:Araport11)
6 DAS	AT4G31500	2.7368	CYP83B1	cytochrome P450, family 83, subfamily B, polypeptide 1;(source:Araport11)
6 DAS	AT2G20610	2.36012	SUR1	Tyrosine transaminase family protein;(source:Araport11)
6 DAS	AT1G74090	2.08155	SOT18	desulfo-glucosinolate sulfotransferase 18;(source:Araport11)
6 DAS	AT4G23100	1.95873	GSH1	glutamate-cysteine ligase;(source:Araport11)
6 DAS	AT2G14750	1.95066	APK	APS kinase;(source:Araport11)
6 DAS	AT3G56400	1.60304	WRKY70	WRKY DNA-binding protein 70;(source:Araport11)
6 DAS	AT1G62570	1.42884	FMO GS-OX4	flavin-monooxygenase glucosinolate S-oxygenase 4;(source:Araport11)
6 DAS	AT1G32640	1.02937	MYC2	Basic helix-loop-helix (bHLH) DNA-binding family protein;(source:Araport11)
6 DAS	AT2G25450	0.98411	AT2G25450	2-oxoglutarate (2OG) and Fe(II)-dependent oxygenase superfamily protein;(source:Araport11)
6 DAS	AT5G14200	0.874692	IMD1	isopropylmalate dehydrogenase 1;(source:Araport11)
6 DAS	AT1G07640	0.623915	OBP2	Dof-type zinc finger DNA-binding family protein;(source:Araport11)
6 DAS	AT2G43090	0.393197	AT2G43090	Aconitase/3-isopropylmalate dehydratase protein;(source:Araport11)
6 DAS	AT4G13430	0.336733	IIL1	isopropyl malate isomerase large subunit 1;(source:Araport11)
10 DAS	AT1G65860	3.71714	FMO GS-OX1	flavin-monooxygenase glucosinolate S-oxygenase 1;(source:Araport11)
10 DAS	AT1G16410	3.65742	CYP79F1	cytochrome p450 79f1;(source:Araport11)
10 DAS	AT3G19710	3.13508	BCAT4	branched-chain aminotransferase4;(source:Araport11)
10 DAS	AT5G23010	2.98549	MAM1	methylthioalkylmalate synthase 1;(source:Araport11)
10 DAS	AT3G58990	2.82259	IPMI1	isopropylmalate isomerase 1;(source:Araport11)
10 DAS	AT4G39940	2.79521	AKN2	APS-kinase 2;(source:Araport11)
10 DAS	AT1G18590	2.72078	SOT17	sulfotransferase 17;(source:Araport11)
10 DAS	AT2G43100	2.71656	IPMI2	isopropylmalate isomerase 2;(source:Araport11)
10 DAS	AT5G14200	2.6698	IMD1	isopropylmalate dehydrogenase 1;(source:Araport11)
10 DAS	AT1G62560	2.6491	FMO GS-OX3	flavin-monooxygenase glucosinolate S-oxygenase 3;(source:Araport11)
10 DAS	AT1G16400	2.64663	CYP79F2	cytochrome P450, family 79, subfamily F, polypeptide 2;(source:Araport11)
10 DAS	AT5G23020	2.61348	IMS2	2-isopropylmalate synthase 2;(source:Araport11)
10 DAS	AT2G22330	2.57704	CYP79B3	cytochrome P450, family 79, subfamily B, polypeptide 3;(source:Araport11)
10 DAS	AT4G13770	2.38938	CYP83A1	cytochrome P450, family 83, subfamily A, polypeptide 1;(source:Araport11)
10 DAS	AT1G24100	2.05608	UGT74B1	UDP-glucosyl transferase 74B1;(source:Araport11)
10 DAS	AT3G56400	1.77613	WRKY70	WRKY DNA-binding protein 70;(source:Araport11)
10 DAS	AT4G12030	1.72457	BAT5	bile acid transporter 5;(source:Araport11)
10 DAS	AT2G20610	1.63883	SUR1	Tyrosine transaminase family protein;(source:Araport11)
10 DAS	AT1G62540	1.52833	FMO GS-OX2	flavin-monooxygenase glucosinolate S-oxygenase 2;(source:Araport11)
10 DAS	AT1G18570	1.47025	MYB51	myb domain protein 51;(source:Araport11)
10 DAS	AT1G74090	1.46982	SOT18	desulfo-glucosinolate sulfotransferase 18;(source:Araport11)
10 DAS	AT1G74100	1.43027	SOT16	sulfotransferase 16;(source:Araport11)
10 DAS	AT4G31500	1.39646	CYP83B1	cytochrome P450, family 83, subfamily B, polypeptide 1;(source:Araport11)
10 DAS	AT4G23100	1.35553	GSH1	glutamate-cysteine ligase;(source:Araport11)
10 DAS	AT2G14750	1.26229	APK	APS kinase;(source:Araport11)
10 DAS	AT2G25450	0.998398	AT2G25450	2-oxoglutarate (2OG) and Fe(II)-dependent oxygenase superfamily protein;(source:Araport11)
10 DAS	AT1G32640	0.676227	MYC2	Basic helix-loop-helix (bHLH) DNA-binding family protein;(source:Araport11)
10 DAS	AT4G13430	0.383332	IIL1	isopropyl malate isomerase large subunit 1;(source:Araport11)
