# Supplementary material for: Seed Transmission of Pathogens: Non-Canonical Immune Response in Arabidopsis Germinating Seeds Compared to Early Seedlings against the Necrotrophic Fungus Alternaria brassicicola
Source: Plants (Basel). 2022 Jun 28;11(13):1708. doi: 10.3390/plants11131708 (PMC9269218; doi:10.3390/plants11131708)
Supplement: Supplementary file 1 [file plants-11-01708-s001.zip › Supplementary Table S4. Data supporting mutants phenotyping figures (mutant phenotyping).xlsx]

## Sheet: Mutant phenotyping
Supplementary Table S4: Quantification of seed colonization and necrosis symptoms in mutants at 3, 6 and 10 days after sowing (DAS). Estim.p.DEV1 represents the probability of a seed to be germinated; estim.p.SYM2 represents the probability of seed or seedling to be colonized by A. brassicicola; estim.p.SYM3 represents the probability of a seedling to contain necroses. IC are confidence intervals…
x	ECO	TRT	DAS	estim.p.DEV1	IC975.p.DEV1	IC125.p.DEV1	estim.p.SYM2	IC975.p.SYM2	IC125.p.SYM2	estim.p.SYM3	IC975.p.SYM3	IC125.p.SYM3
CDTAGT8:Abr.5:03	AGT8	Abr.5	3	0.943333	0.964486	0.910747	0.0633333	0.0971494	0.0407567	1.17023e-09	NaN	0
CDTAGT8:Abr.5:06	AGT8	Abr.5	6	0.966667	0.981973	0.939169	0.473333	0.529933	0.417411	0.0366667	0.0649837	0.0204195
CDTAGT8:Abr.5:10	AGT8	Abr.5	10	0.97	0.984318	0.94336	0.683333	0.733489	0.628519	0.16	0.205943	0.122722
CDTAGT8:WATER.0:03	AGT8	WATER.0	3	0.963333	0.979581	0.935016
CDTAGT8:WATER.0:06	AGT8	WATER.0	6	0.98	0.990988	0.956208
CDTAGT8: WATER.0:10	AGT8	WATER.0	10	0.98	0.990988	0.956208
CDTCESA:Abr.5:03	CESA	Abr.5	3	1	NaN	3,21928651026765e-313	0.00666667	0.0262529	0.0016679	1.17023e-09	NaN	0
CDTCESA:Abr.5:06	CESA	Abr.5	6	1	NaN	3,21928651026765e-313	0.296667	0.350808	0.247693	0.01	0.0305367	0.00322875
CDTCESA:Abr.5:10	CESA	Abr.5	10	1	NaN	3,21928651026765e-313	0.543333	0.598915	0.486651	0.173333	0.220416	0.134572
CDTCESA: WATER.0:03	CESA	WATER.0	3	0.996667	0.999531	0.976733
CDTCESA: WATER.0:06	CESA	WATER.0	6	1	NaN	3,21928651026765e-313
CDTCESA: WATER.0:10	CESA	WATER.0	10	0.996667	0.999531	0.976733
CDTCOI1:Abr.5:03	COI1	Abr.5	3	0.996667	0.999531	0.976733	0.01	0.0305367	0.00322875	1.17023e-09	NaN	0
CDTCOI1:Abr.5:06	COI1	Abr.5	6	1	NaN	3,21928651026765e-313	0.306667	0.361158	0.257088	0.00666667	0.0262529	0.0016679
CDTCOI1:Abr.5:10	COI1	Abr.5	10	1	NaN	3,21928651026765e-313	0.453333	0.510024	0.397828	0.0733333	0.108855	0.0487685
CDTCOI1: WATER.0:03	COI1	WATER.0	3	0.996667	0.999531	0.976733
CDTCOI1: WATER.0:06	COI1	WATER.0	6	0.996667	0.999531	0.976733
CDTCOI1: WATER.0:10	COI1	WATER.0	10	0.996667	0.999531	0.976733
CDTCOL0:Abr.5:03	COL0	Abr.5	3	0.981667	0.989819	0.967203	0.118333	0.146718	0.0948301	1.17023e-09	NaN	0
CDTCOL0:Abr.5:06	COL0	Abr.5	6	0.995	0.998387	0.984615	0.605	0.643371	0.56529	0.0366667	0.0550557	0.024262
CDTCOL0:Abr.5:10	COL0	Abr.5	10	0.998333	0.999765	0.988268	0.653333	0.690372	0.614339	0.136667	0.166546	0.111431
CDTCOL0: WATER.0:03	COL0	WATER.0	3	0.983333	0.99101	0.969306
CDTCOL0: WATER.0:06	COL0	WATER.0	6	0.988333	0.994428	0.975734
CDTCOL0: WATER.0:10	COL0	WATER.0	10	0.988333	0.994428	0.975734
CDTCSLA:Abr.5:03	CSLA	Abr.5	3	0.99	0.996771	0.969463	0.0166667	0.0394072	0.00695391	1.17023e-09	NaN	0
CDTCSLA:Abr.5:06	CSLA	Abr.5	6	0.993333	0.998332	0.973747	0.333333	0.388625	0.282277	0.00333333	0.0232672	0.000469338
CDTCSLA:Abr.5:10	CSLA	Abr.5	10	0.993311	0.998327	0.973661	0.381271	0.437631	0.327937	0.0568562	0.0895448	0.0356336
CDTCSLA: WATER.0:03	CSLA	WATER.0	3	0.993333	0.998332	0.973747
CDTCSLA: WATER.0:06	CSLA	WATER.0	6	1	NaN	3,21928651026765e-313
CDTCSLA: WATER.0:10	CSLA	WATER.0	10	1	NaN	3,21928651026765e-313
CDTEIN2:Abr.5:03	EIN2	Abr.5	3	0.723333	0.771008	0.669981	0.126667	0.16931	0.0935543	1.17023e-09	NaN	0
CDTEIN2:Abr.5:06	EIN2	Abr.5	6	0.713333	0.761673	0.659572	0.28	0.333492	0.2321	0.0133333	0.0349768	0.00501315
CDTEIN2:Abr.5:10	EIN2	Abr.5	10	0.716667	0.764788	0.663038	0.546667	0.602172	0.489976	0.173333	0.220416	0.134572
CDTEIN2: WATER.0:03	EIN2	WATER.0	3	0.830389	0.86976	0.782098
CDTEIN2: WATER.0:06	EIN2	WATER.0	6	0.853047	0.889939	0.806477
CDTEIN2: WATER.0:10	EIN2	WATER.0	10	0.863799	0.899286	0.818335
CDTETR1:Abr.5:03	ETR1	Abr.5	3	0.543333	0.598915	0.486651	3.18101e-09	NaN	0	1.17023e-09	NaN	0
CDTETR1:Abr.5:06	ETR1	Abr.5	6	0.696667	0.746047	0.642289	0.226667	0.27749	0.182797	0.02	0.0437918	0.00901231
CDTETR1:Abr.5:10	ETR1	Abr.5	10	0.743333	0.789587	0.690893	0.383333	0.439627	0.330003	0.1	0.139431	0.0708025
CDTETR1: WATER.0:03	ETR1	WATER.0	3	0.503333	0.55963	0.446952
CDTETR1: WATER.0:06	ETR1	WATER.0	6	0.626667	0.679592	0.570524
CDTETR1: WATER.0:10	ETR1	WATER.0	10	0.726667	0.774114	0.673458
CDTGLAB:Abr.5:03	GLAB	Abr.5	3	0.688963	0.738876	0.634232	3.18101e-09	NaN	0	1.17023e-09	NaN	0
CDTGLAB:Abr.5:06	GLAB	Abr.5	6	0.77	0.814151	0.718981	0.283333	0.336962	0.235212	0.0266667	0.0524053	0.0133908
CDTGLAB:Abr.5:10	GLAB	Abr.5	10	0.786667	0.829371	0.736667	0.48	0.53655	0.423958	0.26	0.312602	0.213501
CDTGLAB: WATER.0:03	GLAB	WATER.0	3	0.826667	0.865428	0.779584
CDTGLAB: WATER.0:06	GLAB	WATER.0	6	0.943333	0.964486	0.910747
CDTGLAB: WATER.0:10	GLAB	WATER.0	10	0.956667	0.974675	0.926814
CDTGT12:Abr.5:03	GT12	Abr.5	3	0.0766667	0.112725	0.0514736	0.00333333	0.0232672	0.000469338	1.17023e-09	NaN	0
CDTGT12:Abr.5:06	GT12	Abr.5	6	0.256667	0.309107	0.210413	0.07	0.10497	0.04608	1.17023e-09	NaN	0
CDTGT12:Abr.5:10	GT12	Abr.5	10	0.383333	0.439627	0.330003	0.236667	0.288064	0.191967	0.0466667	0.0772412	0.0278295
CDTGT12: WATER.0:03	GT12	WATER.0	3	0.13	0.173005	0.0964382
CDTGT12: WATER.0:06	GT12	WATER.0	6	0.38	0.436246	0.326802
CDTGT12: WATER.0:10	GT12	WATER.0	10	0.48	0.53655	0.423958
CDTJAR1:Abr.5:03	JAR1	Abr.5	3	0.986622	0.99497	0.964908	0.0334448	0.0610309	0.0180875	1.17023e-09	NaN	0
CDTJAR1:Abr.5:06	JAR1	Abr.5	6	0.986667	0.994987	0.965023	0.39	0.44638	0.336414	0.00666667	0.0262529	0.0016679
CDTJAR1:Abr.5:10	JAR1	Abr.5	10	0.986667	0.994987	0.965023	0.47	0.526621	0.414141	0.0633333	0.0971494	0.0407567
CDTJAR1: WATER.0:03	JAR1	WATER.0	3	0.98	0.990988	0.956208
CDTJAR1: WATER.0:06	JAR1	WATER.0	6	0.983333	0.993046	0.960593
CDTJAR1: WATER.0:10	JAR1	WATER.0	10	0.986667	0.994987	0.965023
CDTMUM2:Abr.5:03	MUM2	Abr.5	3	0.98	0.990988	0.956208	3.18101e-09	NaN	0	1.17023e-09	NaN	0
CDTMUM2:Abr.5:06	MUM2	Abr.5	6	0.97	0.984318	0.94336	0.49	0.546456	0.433798	0.0566667	0.0892527	0.0355138
CDTMUM2:Abr.5:10	MUM2	Abr.5	10	0.976589	0.988799	0.951718	0.732441	0.779558	0.679396	0.280936	0.334561	0.232899
CDTMUM2: WATER.0:03	MUM2	WATER.0	3	0.946309	0.966851	0.914167
CDTMUM2: WATER.0:06	MUM2	WATER.0	6	0.939799	0.961747	0.906484
CDTMUM2: WATER.0:10	MUM2	WATER.0	10	0.943333	0.964486	0.910747
CDTnahg:Abr.5:03	nahg	Abr.5	3	0.966667	0.981973	0.939169	0.0233333	0.0481239	0.0111636	1.17023e-09	NaN	0
CDTnahg:Abr.5:06	nahg	Abr.5	6	0.98	0.990988	0.956208	0.533333	0.589127	0.476693	0.08	0.116579	0.0541942
CDTnahg:Abr.5:10	nahg	Abr.5	10	0.983333	0.993046	0.960593	0.653333	0.705058	0.597713	0.19	0.238385	0.149508
CDTnahg: WATER.0:03	nahg	WATER.0	3	0.93	0.95392	0.89503
CDTnahg: WATER.0:06	nahg	WATER.0	6	0.953333	0.97217	0.922759
CDTnahg: WATER.0:10	nahg	WATER.0	10	0.963333	0.979581	0.935016
CDTNPR1:Abr.5:03	NPR1	Abr.5	3	0.833333	0.861063	0.801346	0.0533333	0.0744489	0.0379611	1.17023e-09	NaN	0
CDTNPR1:Abr.5:06	NPR1	Abr.5	6	0.846667	0.873335	0.81557	0.446667	0.486704	0.407309	0.0766667	0.100853	0.0579069
CDTNPR1:Abr.5:10	NPR1	Abr.5	10	0.845	0.871805	0.813788	0.595	0.633596	0.555192	0.22	0.254927	0.188647
CDTNPR1: WATER.0:03	NPR1	WATER.0	3	0.935	0.952154	0.912263
CDTNPR1: WATER.0:06	NPR1	WATER.0	6	0.955	0.968963	0.935176
CDTNPR1: WATER.0:10	NPR1	WATER.0	10	0.958333	0.971693	0.939064
CDTPAD3:Abr.5:03	PAD3	Abr.5	3	0.9699	0.984266	0.943174	0.0334448	0.0610309	0.0180875	1.17023e-09	NaN	0
CDTPAD3:Abr.5:06	PAD3	Abr.5	6	0.983221	0.992999	0.960333	0.442953	0.499847	0.387518	0.0268456	0.0527509	0.0134811
CDTPAD3:Abr.5:10	PAD3	Abr.5	10	0.983278	0.993023	0.960463	0.575251	0.630094	0.518491	0.100334	0.139885	0.0710424
CDTPAD3: WATER.0:03	PAD3	WATER.0	3	0.966667	0.981973	0.939169
CDTPAD3: WATER.0:06	PAD3	WATER.0	6	0.98	0.990988	0.956208
CDTPAD3: WATER.0:10	PAD3	WATER.0	10	0.983333	0.993046	0.960593
CDTQKO1:Abr.5:03	QKO1	Abr.5	3	0.186667	0.234801	0.14651	0.00666667	0.0262529	0.0016679	1.17023e-09	NaN	0
CDTQKO1:Abr.5:06	QKO1	Abr.5	6	0.376667	0.432862	0.323604	0.08	0.116579	0.0541942	0.00333333	0.0232672	0.000469338
CDTQKO1:Abr.5:10	QKO1	Abr.5	10	0.41	0.466578	0.355707	0.19	0.238385	0.149508	0.0266667	0.0524053	0.0133908
CDTQKO1: WATER.0:03	QKO1	WATER.0	3	0.196667	0.245536	0.155519
CDTQKO1: WATER.0:06	QKO1	WATER.0	6	0.326667	0.381776	0.275961
CDTQKO1: WATER.0:10	QKO1	WATER.0	10	0.353333	0.409101	0.301292
