# Supplementary material for: Seed Transmission of Pathogens: Non-Canonical Immune Response in Arabidopsis Germinating Seeds Compared to Early Seedlings against the Necrotrophic Fungus Alternaria brassicicola
Source: Plants (Basel). 2022 Jun 28;11(13):1708. doi: 10.3390/plants11131708 (PMC9269218; doi:10.3390/plants11131708)
Supplement: Supplementary file 1 [file plants-11-01708-s001.zip › Supplementary Table S5. Comparison DEGs induced by A. brassicicola .xlsx]

## Sheet: Alternaria-induced genes
Supplementary Table S5: Comparison of differentially expressed genes (DEGs) induced by A. brassicicola identified in van Wees et al. 2003. Genes induced by A. brassicicola in rosette leaves reported by van Wees et al, 2003, were compared with our RNA-seq data corresponding to upregulated genes by A. brassicicola infection in germinating seeds and seedlings.
Common induced genes by A. brassicicola. Gene symbol and TAIR description were taken from The Arabidopsis Information Resource (TAIR)
geneID	log2(FC) 3_DAS	log2(FC)_6 DAS	log2(FC) _10 DAS	Gene Symbol	TAIR Description
AT1G01480		5.843504547	2.268537913	ACS2	1-amino-cyclopropane-1-carboxylate synthase 2;(source:Araport11)
AT1G02920	0.760633067	6.710628322	2.476486606	GSTF7	glutathione S-transferase 7;(source:Araport11)
AT1G03220		3.326418755	1.855311465	AT1G03220	Eukaryotic aspartyl protease family protein;(source:Araport11)
AT1G03230		0.731785931	1.389019901	AT1G03230	Eukaryotic aspartyl protease family protein;(source:Araport11)
AT1G03370		1.534630737	0.844508616	AT1G03370	C2 calcium/lipid-binding and GRAM domain containing protein;(source:Araport11)
AT1G04100		2.767275234	2.057810225	IAA10	indoleacetic acid-induced protein 10;(source:Araport11)
AT1G05340		1.566828809		AT1G05340	cysteine-rich TM module stress tolerance protein;(source:Araport11)
AT1G06180		1.511172266	2.445369569	MYB13	myb domain protein 13;(source:Araport11)
AT1G07890		0.864312219	0.575569806	APX1	ascorbate peroxidase 1;(source:Araport11)
AT1G08800		1.435613968	0.907026755	AT1G08800	myosin-binding protein (Protein of unknown function, DUF593);(source:Araport11)
AT1G08830		1.298156154	0.815834019	CSD1	copper/zinc superoxide dismutase 1;(source:Araport11)
AT1G09200			1.247808768	AT1G09200	Histone superfamily protein;(source:Araport11)
AT1G09480		2.994475319	1.284141005	AT1G09480	NAD(P)-binding Rossmann-fold superfamily protein;(source:Araport11)
AT1G09500		5.17735393	2.818226425	AT1G09500	NAD(P)-binding Rossmann-fold superfamily protein;(source:Araport11)
AT1G09560		1.76025667	2.187616315	GLP5	germin-like protein 5;(source:Araport11)
AT1G09630		0.878896924	1.213035725	RAB11c	RAB GTPase 11C;(source:Araport11)
AT1G09740			1.174499964	AT1G09740	Adenine nucleotide alpha hydrolases-like superfamily protein;(source:Araport11)
AT1G09970		1.635680784	0.873676456	LRR XI-23	Leucine-rich receptor-like protein kinase family protein;(source:Araport11)
AT1G10040		3.147808957	1.45371837	AT1G10040	alpha/beta-Hydrolases superfamily protein;(source:Araport11)
AT1G10070		0.920157986		BCAT-2	branched-chain amino acid transaminase 2;(source:Araport11)
AT1G10410		1.219232793	1.051684199	AT1G10410	CW14 protein (DUF1336);(source:Araport11)
AT1G11050		2.480871522	1.144906231	AT1G11050	Protein kinase superfamily protein;(source:Araport11)
AT1G11580			1.14348997	PMEPCRA	methylesterase PCR A;(source:Araport11)
AT1G13110		0.877017777	0.779142362	CYP71B7	cytochrome P450, family 71 subfamily B, polypeptide 7;(source:Araport11)
AT1G13210		2.531314908	1.559451399	ACA.l	autoinhibited Ca2+/ATPase II;(source:Araport11)
AT1G13990		1.575147672	1.129835867	AT1G13990	plant/protein;(source:Araport11)
AT1G16300		0.857612557	0.732715484	GAPCP-2	glyceraldehyde-3-phosphate dehydrogenase of plastid 2;(source:Araport11)
AT1G16520			0.566767217	AT1G16520	interactor of constitutive active ROPs protein;(source:Araport11)
AT1G17020		1.144990062	2.271855127	SRG1	senescence-related gene 1;(source:Araport11)
AT1G17420		3.170768475	1.912556826	LOX3	lipoxygenase 3;(source:Araport11)
AT1G17745		2.909510595	2.571663057	PGDH	D-3-phosphoglycerate dehydrogenase;(source:Araport11)
AT1G18570		3.817235322	1.47024563	MYB51	myb domain protein 51;(source:Araport11)
AT1G18890		1.865563707	1.236398284	CDPK1	calcium-dependent protein kinase 1;(source:Araport11)
AT1G19670		1.137398003	2.467697248	CLH1	chlorophyllase 1;(source:Araport11)
AT1G21250		4.886307759	3.435091192	WAK1	cell wall-associated kinase;(source:Araport11)
AT1G21750		0.728227898	1.376251712	PDIL1-1	PDI-like 1-1;(source:Araport11)
AT1G22360		0.922142432	1.216521904	UGT85A2	UDP-glucosyl transferase 85A2;(source:Araport11)
AT1G23040		0.814344828	1.298312762	AT1G23040	hydroxyproline-rich glycoprotein family protein;(source:Araport11)
AT1G23710		2.327963659	1.326446352	AT1G23710	hypothetical protein (DUF1645);(source:Araport11)
AT1G24100		3.019660841	2.056076168	UGT74B1	UDP-glucosyl transferase 74B1;(source:Araport11)
AT1G24140		6.455394111	3.042360965	AT1G24140	Matrixin family protein;(source:Araport11)
AT1G24180		0.417657237	0.803879174	IAR4	Thiamin diphosphate-binding fold (THDP-binding) superfamily protein;(source:Araport11)
AT1G24625		0.731221213		ZFP7	zinc finger protein 7;(source:Araport11)
AT1G26930		1.441251518	1.623207831	AT1G26930	Galactose oxidase/kelch repeat superfamily protein;(source:Araport11)
AT1G27130		1.090057366		GSTU13	glutathione S-transferase tau 13;(source:Araport11)
AT1G27730		4.230889045	1.893552254	STZ	salt tolerance zinc finger;(source:Araport11)
AT1G30620		2.420386103	2.025420486	MUR4	NAD(P)-binding Rossmann-fold superfamily protein;(source:Araport11)
AT1G30630			0.812435627	AT1G30630	Coatomer epsilon subunit;(source:Araport11)
AT1G30700		3.263743277	1.906610139	AT1G30700	FAD-binding Berberine family protein;(source:Araport11)
AT1G31130		2.398803896	1.124293346	AT1G31130	polyadenylate-binding protein 1-B-binding protein;(source:Araport11)
AT1G45145		1.97421422	2.053585367	TRX5	thioredoxin H-type 5;(source:Araport11)
AT1G50430		0.63476056	0.764684669	DWF5	Ergosterol biosynthesis ERG4/ERG24 family;(source:Araport11)
AT1G51680		1.371282198	1.509516427	4CL1	4-coumarate:CoA ligase 1;(source:Araport11)
AT1G51760		3.121509036	2.449910645	IAR3	peptidase M20/M25/M40 family protein;(source:Araport11)
AT1G54000			1.098402027	GLL22	GDSL-like Lipase/Acylhydrolase superfamily protein;(source:Araport11)
AT1G54010			0.906243634	AT1G54010	GDSL-like Lipase/Acylhydrolase superfamily protein;(source:Araport11)
AT1G54030			0.777793675	MVP1	GDSL-like Lipase/Acylhydrolase superfamily protein;(source:Araport11)
AT1G55020		4.676069705	4.381958256	LOX1	lipoxygenase 1;(source:Araport11)
AT1G55450		2.513251035	0.818875895	AT1G55450	S-adenosyl-L-methionine-dependent methyltransferases superfamily protein;(source:Araport11)
AT1G55920		2.31302405	1.40547188	SERAT2;1	serine acetyltransferase 2;(source:Araport11)
AT1G59960		0.779352054	1.41681486	AT1G59960	NAD(P)-linked oxidoreductase superfamily protein;(source:Araport11)
AT1G59970			0.686444461	AT1G59970	Matrixin family protein;(source:Araport11)
AT1G60710			0.321364371	ATB2	NAD(P)-linked oxidoreductase superfamily protein;(source:Araport11)
AT1G61120		5.514388537	3.539535757	TPS04	terpene synthase 04;(source:Araport11)
AT1G61250		1.355475213	0.851580257	SC3	secretory carrier 3;(source:Araport11)
AT1G61360		3.918788981	1.108876226	AT1G61360	S-locus lectin protein kinase family protein;(source:Araport11)
AT1G61380		1.36705997		SD1-29	S-domain-1 29;(source:Araport11)
AT1G61560		2.311184366		MLO6	Seven transmembrane MLO family protein;(source:Araport11)
AT1G61640		0.684868645		AT1G61640	Protein kinase superfamily protein;(source:Araport11)
AT1G61770			0.700643108	AT1G61770	Chaperone DnaJ-domain superfamily protein;(source:Araport11)
AT1G61800		2.420096701	4.403744485	GPT2	glucose-6-phosphate/phosphate translocator 2;(source:Araport11)
AT1G62200		1.406418139	1.058810725	PTR6	Major facilitator superfamily protein;(source:Araport11)
AT1G62300		3.525154826	1.768673944	WRKY6	WRKY family transcription factor;(source:Araport11)
AT1G62570		1.428836309		FMO GS-OX4	flavin-monooxygenase glucosinolate S-oxygenase 4;(source:Araport11)
AT1G64710		1.212772632		AT1G64710	GroES-like zinc-binding alcohol dehydrogenase family protein;(source:Araport11)
AT1G64900		0.87193649		CYP89A2	cytochrome P450, family 89, subfamily A, polypeptide 2;(source:Araport11)
AT1G65250		1.506988472	1.595772089	AT1G65250	Protein kinase superfamily protein;(source:Araport11)
AT1G65500		2.694715303	1.476837272	AT1G65500	transmembrane protein;(source:Araport11)
AT1G65970		3.1655816	1.188833668	TPX2	thioredoxin-dependent peroxidase 2;(source:Araport11)
AT1G66580		1.8225955	1.132827743	SAG24	senescence associated gene 24;(source:Araport11)
AT1G67470		1.620023958	0.769845747	AT1G67470	Protein kinase superfamily protein;(source:Araport11)
AT1G67520		2.154159822	1.922487321	AT1G67520	lectin protein kinase family protein;(source:Araport11)
AT1G67980		7.771508312	2.224515771	CCOAMT	caffeoyl-CoA 3-O-methyltransferase;(source:Araport11)
AT1G69960		0.475062717	0.645415805	PP2A	serine/threonine protein phosphatase 2A;(source:Araport11)
AT1G70420		3.033858968	0.734751701	AT1G70420	DNA ligase-like protein, putative (DUF1645);(source:Araport11)
AT1G74020		1.145802667	1.083363069	SS2	strictosidine synthase 2;(source:Araport11)
AT1G75040		4.32470427	3.292324229	PR5	pathogenesis-related protein 5;(source:Araport11)
AT1G76960		2.086469153	2.347349519	AT1G76960	transmembrane protein;(source:Araport11)
AT1G76970		1.988590194	1.064231085	AT1G76970	Target of Myb protein 1;(source:Araport11)
AT1G77380		2.065150803	0.704396053	AAP3	amino acid permease 3;(source:Araport11)
AT1G78570			1.066753937	RHM1	rhamnose biosynthesis 1;(source:Araport11)
AT1G78830		2.290026775	1.263374845	AT1G78830	Curculin-like (mannose-binding) lectin family protein;(source:Araport11)
AT1G78850		3.397942487	1.503096778	AT1G78850	D-mannose binding lectin protein with Apple-like carbohydrate-binding domain-containing protein;(source:Araport11)
AT1G78860		1.077578753	1.939398857	AT1G78860	D-mannose binding lectin protein with Apple-like carbohydrate-binding domain-containing protein;(source:Araport11)
AT1G79530			0.551238647	GAPCP-1	glyceraldehyde-3-phosphate dehydrogenase of plastid 1;(source:Araport11)
AT1G79550		0.662968892		PGK	phosphoglycerate kinase;(source:Araport11)
AT1G80300		2.226957242	1.664228857	NTT1	nucleotide transporter 1;(source:Araport11)
AT2G02010		7.678034848	4.083513159	GAD4	glutamate decarboxylase 4;(source:Araport11)
AT2G02040		0.976462573	0.604658523	PTR2	peptide transporter 2;(source:Araport11)
AT2G02220		1.651038204		PSKR1	phytosulfokin receptor 1;(source:Araport11)
AT2G02390		1.133589182	1.446187685	GSTZ1	glutathione S-transferase zeta 1;(source:Araport11)
AT2G02810		2.686202345	2.316267497	UTR1	UDP-galactose transporter 1;(source:Araport11)
AT2G02930		5.785923721		GSTF3	glutathione S-transferase F3;(source:Araport11)
AT2G03240		0.762509847		AT2G03240	EXS (ERD1/XPR1/SYG1) family protein;(source:Araport11)
AT2G03530		1.047527459		UPS2	ureide permease 2;(source:Araport11)
AT2G03980			0.805113485	AT2G03980	GDSL-like Lipase/Acylhydrolase superfamily protein;(source:Araport11)
AT2G04400		3.501417818	2.251347352	AT2G04400	Aldolase-type TIM barrel family protein;(source:Araport11)
AT2G05940		2.836714351	2.144764552	RIPK	Protein kinase superfamily protein;(source:Araport11)
AT2G06050		1.570419348	1.575640728	OPR3	oxophytodienoate-reductase 3;(source:Araport11)
AT2G14290		6.368406238	3.758158669	AT2G14290	LL-diaminopimelate protein (DUF295);(source:Araport11)
AT2G14560		4.10404134	3.021210359	LURP1	LURP-one-like protein (DUF567);(source:Araport11)
AT2G14750		1.950660058	1.262290592	APK	APS kinase;(source:Araport11)
AT2G15080		1.782102829	0.664629555	RLP19	receptor like protein 19;(source:Araport11)
AT2G15390		3.319159218	1.897223629	FUT4	fucosyltransferase 4;(source:Araport11)
AT2G16500		1.284000658	1.020937087	ADC1	arginine decarboxylase 1;(source:Araport11)
AT2G17130			0.661952783	IDH2	isocitrate dehydrogenase subunit 2;(source:Araport11)
AT2G17220		1.617320162	0.940521444	Kin3	Protein kinase superfamily protein;(source:Araport11)
AT2G17290		0.966765028		CPK6	Calcium-dependent protein kinase family protein;(source:Araport11)
AT2G17420		1.172231992	1.009805211	NTRA	NADPH-dependent thioredoxin reductase A;(source:Araport11)
AT2G17720		0.698348393	1.216685216	P4H5	2-oxoglutarate (2OG) and Fe(II)-dependent oxygenase superfamily protein;(source:Araport11)
AT2G18680		3.550193126	1.668935855	AT2G18680	transmembrane protein;(source:Araport11)
AT2G18690		4.595825048	1.47464581	AT2G18690	transmembrane protein;(source:Araport11)
AT2G19160		0.608037526	0.915751563	AT2G19160	Core-2/I-branching beta-1,6-N-acetylglucosaminyltransferase family protein;(source:Araport11)
AT2G20320		1.5575834	0.746257778	AT2G20320	DENN (AEX-3) domain-containing protein;(source:Araport11)
AT2G20420		0.920286239	0.679111562	AT2G20420	ATP citrate lyase (ACL) family protein;(source:Araport11)
AT2G20610		2.36011839	1.638826702	SUR1	Tyrosine transaminase family protein;(source:Araport11)
AT2G20900		1.903039131	1.160021355	DGK5	diacylglycerol kinase 5;(source:Araport11)
AT2G21160			0.548286553	AT2G21160	Translocon-associated protein (TRAP), alpha subunit;(source:Araport11)
AT2G21520		0.658092063	0.467123555	AT2G21520	Sec14p-like phosphatidylinositol transfer family protein;(source:Araport11)
AT2G21620		1.097899889	1.397118166	RD2	Adenine nucleotide alpha hydrolases-like superfamily protein;(source:Araport11)
AT2G22470		1.575549376	2.481992455	AGP2	arabinogalactan protein 2;(source:Araport11)
AT2G22500		2.752564352	2.150547912	UCP5	uncoupling protein 5;(source:Araport11)
AT2G22780			0.497748596	PMDH1	peroxisomal NAD-malate dehydrogenase 1;(source:Araport11)
AT2G22860		1.764279748	1.407082745	PSK2	phytosulfokine 2 precursor;(source:Araport11)
AT2G23150		1.926072018	1.030313879	NRAMP3	natural resistance-associated macrophage protein 3;(source:Araport11)
AT2G23170		4.895601052	4.244035507	GH3.3	Auxin-responsive GH3 family protein;(source:Araport11)
AT2G23260		6.351862857	2.60961454	UGT84B1	UDP-glucosyl transferase 84B1;(source:Araport11)
AT2G23320		2.591909724	1.436374142	WRKY15	WRKY DNA-binding protein 15;(source:Araport11)
AT2G24100		1.089876742		ASG1	ATP-dependent DNA helicase;(source:Araport11)
AT2G24170			0.438495402	AT2G24170	Endomembrane protein 70 protein family;(source:Araport11)
AT2G24180		4.607783254	2.740856276	CYP71B6	cytochrome p450 71b6;(source:Araport11)
AT2G24200		2.382089347	1.698888677	LAP1	Cytosol aminopeptidase family protein;(source:Araport11)
AT2G24490			0.673163731	RPA2	replicon protein A2;(source:Araport11)
AT2G24850			2.439833061	TAT3	tyrosine aminotransferase 3;(source:Araport11)
AT2G25440		5.917830138	2.679366915	RLP20	receptor like protein 20;(source:Araport11)
AT2G26190		1.00451643		AT2G26190	calmodulin-binding family protein;(source:Araport11)
AT2G26650		1.121855886	0.397295133	KT1	K+ transporter 1;(source:Araport11)
AT2G27310		2.209064227	1.399528542	AT2G27310	F-box family protein;(source:Araport11)
AT2G27730			0.959032922	AT2G27730	copper ion binding protein;(source:Araport11)
AT2G27820		0.786406062	0.811553874	PD1	prephenate dehydratase 1;(source:Araport11)
AT2G28210		2.860536563	3.772665694	ACA2	alpha carbonic anhydrase 2;(source:Araport11)
AT2G28400		3.023947214	2.036606742	AT2G28400	senescence regulator (Protein of unknown function, DUF584);(source:Araport11)
AT2G29340		2.010481207		AT2G29340	NAD-dependent epimerase/dehydratase family protein;(source:Araport11)
AT2G29410		3.603404703	2.121883965	MTPB1	metal tolerance protein B1;(source:Araport11)
AT2G29720		3.314043002	2.037339532	CTF2B	FAD/NAD(P)-binding oxidoreductase family protein;(source:Araport11)
AT2G29990		1.272298144	1.347810514	NDA2	alternative NAD(P)H dehydrogenase 2;(source:Araport11)
AT2G30060		0.46695328		AT2G30060	Pleckstrin homology (PH) domain superfamily protein;(source:Araport11)
AT2G30140		2.187506193	1.347298438	UGT87A2	UDP-Glycosyltransferase superfamily protein;(source:Araport11)
AT2G30360		1.826937264	1.269162132	SIP4	SOS3-interacting protein 4;(source:Araport11)
AT2G30490		1.909980293	1.675446422	C4H	cinnamate-4-hydroxylase;(source:Araport11)
AT2G30550		2.121573886	2.497249046	AT2G30550	alpha/beta-Hydrolases superfamily protein;(source:Araport11)
AT2G30770		13.43495006	6.821609849	CYP71A13	cytochrome P450 family 71 polypeptide;(source:Araport11)
AT2G30840			0.490379009	AT2G30840	2-oxoglutarate (2OG) and Fe(II)-dependent oxygenase superfamily protein;(source:Araport11)
AT2G30860		2.110275364	1.319381446	GSTF9	glutathione S-transferase PHI 9;(source:Araport11)
AT2G30870		2.069778923	2.019759182	GSTF10	glutathione S-transferase PHI 10;(source:Araport11)
AT2G31390		0.655737394	1.272042476	AT2G31390	pfkB-like carbohydrate kinase family protein;(source:Araport11)
AT2G31570		1.4199889	0.734437354	GPX2	glutathione peroxidase 2;(source:Araport11)
AT2G31880		2.656632893	1.485859128	SOBIR1	Leucine-rich repeat protein kinase family protein;(source:Araport11)
AT2G32030		4.088497056	1.859161679	AT2G32030	Acyl-CoA N-acyltransferases (NAT) superfamily protein;(source:Araport11)
AT2G32200		3.03757141	2.074247925	AT2G32200	cysteine-rich/transmembrane domain A-like protein;(source:Araport11)
AT2G32210		3.964516708	2.864650217	AT2G32210	cysteine-rich/transmembrane domain A-like protein;(source:Araport11)
AT2G32680		2.48030305	2.282499115	RLP23	receptor like protein 23;(source:Araport11)
AT2G33110		3.180850413	1.682378528	VAMP723	vesicle-associated membrane protein 723;(source:Araport11)
AT2G33120		1.726528524	1.185285637	SAR1	synaptobrevin-related protein 1;(source:Araport11)
AT2G33580		2.877416881	1.273497748	LYK5	Protein kinase superfamily protein;(source:Araport11)
AT2G33600		1.131388188	0.603307504	CRL2	NAD(P)-binding Rossmann-fold superfamily protein;(source:Araport11)
AT2G34070			0.735962233	TBL37	TRICHOME BIREFRINGENCE-LIKE 37;(source:Araport11)
AT2G34250		0.556408763	0.638361966	AT2G34250	SecY protein transport family protein;(source:Araport11)
AT2G34500		4.218789488	1.196616662	CYP710A1	cytochrome P450, family 710, subfamily A, polypeptide 1;(source:Araport11)
AT2G34930		3.607625734	3.577649105	AT2G34930	disease resistance family protein / LRR family protein;(source:Araport11)
AT2G36530			0.698682904	LOS2	Enolase;(source:Araport11)
AT2G36580		1.370176719	1.091446995	AT2G36580	Pyruvate kinase family protein;(source:Araport11)
AT2G36690		1.994978331		AT2G36690	2-oxoglutarate (2OG) and Fe(II)-dependent oxygenase superfamily protein;(source:Araport11)
AT2G36800		1.395094577	1.155223512	DOGT1	don-glucosyltransferase 1;(source:Araport11)
AT2G36880			1.188991148	MAT3	methionine adenosyltransferase 3;(source:Araport11)
AT2G36950		1.962479058	1.251757277	AT2G36950	Heavy metal transport/detoxification superfamily protein;(source:Araport11)
AT2G37040		1.499768235	2.160757212	PAL1	PHE ammonia lyase 1;(source:Araport11)
AT2G37110		1.151743099	1.119375307	AT2G37110	PLAC8 family protein;(source:Araport11)
AT2G37250			0.463563876	ADK	adenosine kinase;(source:Araport11)
AT2G37710		1.095673911	0.611609506	RLK	receptor lectin kinase;(source:Araport11)
AT2G37760		1.201065229	1.111811799	AKR4C8	NAD(P)-linked oxidoreductase superfamily protein;(source:Araport11)
AT2G37770		1.739490654	2.565199236	ChlAKR	NAD(P)-linked oxidoreductase superfamily protein;(source:Araport11)
AT2G37940		1.703173438	1.198341002	AtIPCS2	Inositol phosphorylceramide synthase 2;(source:Araport11)
AT2G38360		0.861267534	1.564912816	PRA1.B4	prenylated RAB acceptor 1.B4;(source:Araport11)
AT2G38470		4.270349052	1.620801066	WRKY33	WRKY DNA-binding protein 33;(source:Araport11)
AT2G38810			0.992476653	HTA8	histone H2A 8;(source:Araport11)
AT2G38860		4.880435821	2.141863556	YLS5	Class I glutamine amidotransferase-like superfamily protein;(source:Araport11)
AT2G39330			4.217690051	JAL23	jacalin-related lectin 23;(source:Araport11)
AT2G39420			1.052611378	AT2G39420	alpha/beta-Hydrolases superfamily protein;(source:Araport11)
AT2G39710			0.607466015	AT2G39710	Eukaryotic aspartyl protease family protein;(source:Araport11)
AT2G40110			0.479426009	AT2G40110	Yippee family putative zinc-binding protein;(source:Araport11)
AT2G40140		2.198434987	0.916558896	CZF1	zinc finger (CCCH-type) family protein;(source:Araport11)
AT2G41110		0.69145289	1.011746021	CAM2	calmodulin 2;(source:Araport11)
AT2G41180		1.387363737	1.774413835	SIB2	VQ motif-containing protein;(source:Araport11)
AT2G41230		4.617041923	2.770521473	ORS1	ORGAN SIZE-like protein;(source:Araport11)
AT2G41380		3.008197443	1.14025374	AT2G41380	S-adenosyl-L-methionine-dependent methyltransferases superfamily protein;(source:Araport11)
AT2G41410		1.420927364	0.539888943	AT2G41410	Calcium-binding EF-hand family protein;(source:Araport11)
AT2G42360		4.733875168	2.818628802	AT2G42360	RING/U-box superfamily protein;(source:Araport11)
AT2G42760		0.926582382	0.868669746	AT2G42760	DUF1685 family protein;(source:Araport11)
AT2G42980		3.993491666	1.422833944	AT2G42980	Eukaryotic aspartyl protease family protein;(source:Araport11)
AT2G43000		5.700621665	1.560609495	NAC042	NAC domain containing protein 42;(source:Araport11)
AT2G43150		1.377043117	2.283513232	AT2G43150	Proline-rich extensin-like family protein;(source:Araport11)
AT2G43530			0.984778935	AT2G43530	scorpion toxin-like knottin superfamily protein;(source:Araport11)
AT2G43570		5.399668524	2.001938373	CHI	chitinase;(source:Araport11)
AT2G43590		4.682153306		AT2G43590	Chitinase family protein;(source:Araport11)
AT2G43820			0.504715442	UGT74F2	UDP-glucosyltransferase 74F2;(source:Araport11)
AT2G44480		1.415984684	1.623494794	BGLU17	beta glucosidase 17;(source:Araport11)
AT2G44490		0.996315746		PEN2	Glycosyl hydrolase superfamily protein;(source:Araport11)
AT2G44790		1.449077267	1.613505562	UCC2	uclacyanin 2;(source:Araport11)
AT2G45070		0.647059903	0.875786043	SEC61 BETA	Preprotein translocase Sec, Sec61-beta subunit protein;(source:Araport11)
AT2G45290			1.278743821	AT2G45290	Transketolase;(source:Araport11)
AT2G45570		8.868140058	5.802780886	CYP76C2	cytochrome P450, family 76, subfamily C, polypeptide 2;(source:Araport11)
AT2G46140		1.031476477	1.45248382	AT2G46140	Late embryogenesis abundant protein;(source:Araport11)
AT2G46390		0.579586113		SDH8	succinate dehydrogenase subunit;(source:Araport11)
AT2G46430		2.626607181	1.061320396	CNGC3	cyclic nucleotide gated channel 3;(source:Araport11)
AT2G46500		1.660239039	1.062713833	PI4K GAMMA 4	phosphoinositide 4-kinase gamma 4;(source:Araport11)
AT2G47470		1.204473508	1.456549991	UNE5	thioredoxin family protein;(source:Araport11)
AT2G47510		0.691249197	1.024054308	FUM1	fumarase 1;(source:Araport11)
AT2G47650		0.999017607	1.568319107	UXS4	UDP-xylose synthase 4;(source:Araport11)
AT3G01930		0.674013546		AT3G01930	Major facilitator superfamily protein;(source:Araport11)
AT3G02520		1.287949908	0.912520732	GRF7	general regulatory factor 7;(source:Araport11)
AT3G04720		3.399967899	3.163201876	PR4	pathogenesis-related 4;(source:Araport11)
AT3G08580			0.82505951	AAC1	ADP/ATP carrier 1;(source:Araport11)
AT3G08720		1.334762201	1.086590515	S6K2	serine/threonine protein kinase 2;(source:Araport11)
AT3G08760		1.544404846		ATSIK	Protein kinase superfamily protein;(source:Araport11)
AT3G09010		2.755750535	2.746412882	AT3G09010	Protein kinase superfamily protein;(source:Araport11)
AT3G11900		1.375086288	0.341488288	ANT1	aromatic and neutral transporter 1;(source:Araport11)
AT3G12500			2.667322373	HCHIB	basic chitinase;(source:Araport11)
AT3G14310			0.540104473	PME3	pectin methylesterase 3;(source:Araport11)
AT3G15210		1.856265582	1.047064682	ERF4	ethylene responsive element binding factor 4;(source:Araport11)
AT3G15356		5.266246385	3.737560172	AT3G15356	Legume lectin family protein;(source:Araport11)
AT3G16500		0.936899582		PAP1	phytochrome-associated protein 1;(source:Araport11)
AT3G17240		0.813642224	1.123113389	mtLPD2	lipoamide dehydrogenase 2;(source:Araport11)
AT3G21240		1.629631195	1.866849737	4CL2	4-coumarate:CoA ligase 2;(source:Araport11)
AT3G22370		1.478279271		AOX1A	alternative oxidase 1A;(source:Araport11)
AT3G23030		1.800738639	0.431589962	IAA2	indole-3-acetic acid inducible 2;(source:Araport11)
AT3G23240		5.524676573	3.519639084	ERF1	ethylene response factor 1;(source:Araport11)
AT3G24170		1.577310525	1.274698095	GR1	glutathione-disulfide reductase;(source:Araport11)
AT3G26830		6.58521817	5.495764662	PAD3	Cytochrome P450 superfamily protein;(source:Araport11)
AT3G28210		3.088226601	1.700279919	PMZ	zinc finger (AN1-like) family protein;(source:Araport11)
AT3G28930		5.156955956	4.317898753	AIG2	AIG2-like (avirulence induced gene) family protein;(source:Araport11)
AT3G45140		2.445363669	3.376273049	LOX2	lipoxygenase 2;(source:Araport11)
AT3G46090		3.238065668		ZAT7	C2H2 and C2HC zinc fingers superfamily protein;(source:Araport11)
AT3G46930		1.86780782	0.933168861	AT3G46930	Protein kinase superfamily protein;(source:Araport11)
AT3G47420		2.704865299		G3Pp1	putative glycerol-3-phosphate transporter 1;(source:Araport11)
AT3G47800		1.355798812	0.94322168	AT3G47800	Galactose mutarotase-like superfamily protein;(source:Araport11)
AT3G48890		2.729026682	1.869930304	MAPR3	membrane-associated progesterone binding protein 3;(source:Araport11)
AT3G49120		2.656476278	2.143949113	PRXCB	peroxidase CB;(source:Araport11)
AT3G50760		2.788748301	2.694084714	GATL2	galacturonosyltransferase-like 2;(source:Araport11)
AT3G50770		4.640845598	1.870283233	CML41	calmodulin-like 41;(source:Araport11)
AT3G51860		1.288869537	0.857570174	CAX3	cation exchanger 3;(source:Araport11)
AT3G53260		1.993418147	1.557663123	PAL2	phenylalanine ammonia-lyase 2;(source:Araport11)
AT3G54110		0.990323084	1.089266597	PUMP1	plant uncoupling mitochondrial protein 1;(source:Araport11)
AT3G54420		1.482572264		EP3	homolog of carrot EP3-3 chitinase;(source:Araport11)
AT3G54640		4.402261519	2.845691936	TSA1	tryptophan synthase alpha chain;(source:Araport11)
AT3G54950		1.798663803	1.430230002	pPLAIIIbeta	patatin-like protein 6;(source:Araport11)
AT3G54960			1.191604208	PDIL1-3	PDI-like 1-3;(source:Araport11)
AT3G57260		4.500204754	2.515224678	BGL2	beta-1,3-glucanase 2;(source:Araport11)
AT3G57630		1.813035297	1.444817654	AT3G57630	exostosin family protein;(source:Araport11)
AT3G59760		1.377974671	1.249689058	OASC	O-acetylserine (thiol) lyase isoform C;(source:Araport11)
AT3G60140		3.42096886	1.936771519	DIN2	Glycosyl hydrolase superfamily protein;(source:Araport11)
AT3G61440		1.201277137	0.392405763	CYSC1	cysteine synthase C1;(source:Araport11)
AT4G00860			0.719973219	ATOZI1	monopolar spindle protein (DUF1138);(source:Araport11)
AT4G01010		5.255268132	2.41450273	CNGC13	cyclic nucleotide-gated channel 13;(source:Araport11)
AT4G01660			0.518455426	ABC1	ABC transporter 1;(source:Araport11)
AT4G01870		1.849926573	1.471856246	AT4G01870	tolB protein-like protein;(source:Araport11)
AT4G01900			0.41702775	GLB1	nitrogen regulatory P-II-like protein;(source:Araport11)
AT4G01960		0.866948568	0.593498695	AT4G01960	transmembrane protein;(source:Araport11)
AT4G02200		0.922453754		AT4G02200	Drought-responsive family protein;(source:Araport11)
AT4G02380		1.890296473	2.19053778	SAG21	senescence-associated gene 21;(source:Araport11)
AT4G02520		4.958454224	2.952317485	GSTF2	glutathione S-transferase PHI 2;(source:Araport11)
AT4G02940		1.524839682	1.55556064	AT4G02940	oxidoreductase, 2OG-Fe(II) oxygenase family protein;(source:Araport11)
AT4G03420		1.497337311	0.431807631	AT4G03420	hypothetical protein (DUF789);(source:Araport11)
AT4G04490		4.375388713	2.881046497	CRK36	cysteine-rich RLK (RECEPTOR-like protein kinase) 36;(source:Araport11)
AT4G04610		2.891276119	1.656860751	APR1	APS reductase 1;(source:Araport11)
AT4G05050		1.187745979	1.144224988	UBQ11	ubiquitin 11;(source:Araport11)
AT4G08390		0.430781215	0.446142341	SAPX	stromal ascorbate peroxidase;(source:Araport11)
AT4G10140			0.55230915	AT4G10140	transmembrane protein;(source:Araport11)
AT4G11010			0.531756315	NDPK3	nucleoside diphosphate kinase 3;(source:Araport11)
AT4G11280		5.553521824	3.094497286	ACS6	1-aminocyclopropane-1-carboxylic acid (acc) synthase 6;(source:Araport11)
AT4G11370		2.902473396	1.679686302	RHA1A	RING-H2 finger A1A;(source:Araport11)
AT4G11650		2.701530475	2.539631734	OSM34	osmotin 34;(source:Araport11)
AT4G12040		0.567781479	0.380493655	SAP7	A20/AN1-like zinc finger family protein;(source:Araport11)
AT4G12470		1.285978981		AZI1	azelaic acid induced 1;(source:Araport11)
AT4G12480			1.31922043	EARLI1	Bifunctional inhibitor/lipid-transfer protein/seed storage 2S albumin superfamily protein;(source:Araport11)
AT4G12720		1.817049741	1.168430705	NUDT7	MutT/nudix family protein;(source:Araport11)
AT4G14220		1.129246972	0.814188467	RHF1A	RING-H2 group F1A;(source:Araport11)
AT4G14450		5.061155337	2.474180305	AT4G14450	hypothetical protein;(source:Araport11)
AT4G14680		2.14717143	1.256923859	APS3	Pseudouridine synthase/archaeosine transglycosylase-like family protein;(source:Araport11)
AT4G15610		1.383573641	0.922855496	AT4G15610	Uncharacterized protein family (UPF0497);(source:Araport11)
AT4G16260		3.481956385	3.716097622	AT4G16260	Glycosyl hydrolase superfamily protein;(source:Araport11)
AT4G16660		2.07004839	1.984774575	AT4G16660	heat shock protein 70 (Hsp 70) family protein;(source:Araport11)
AT4G16820		9.339341317	2.045812584	PLA-I{beta]2	alpha/beta-Hydrolases superfamily protein;(source:Araport11)
AT4G17070		1.33872211	0.825205979	AT4G17070	peptidyl-prolyl cis-trans isomerase;(source:Araport11)
AT4G17230		1.377056258	0.487178503	SCL13	SCARECROW-like 13;(source:Araport11)
AT4G17490		4.880776276	3.084355535	ERF6	ethylene responsive element binding factor 6;(source:Araport11)
AT4G17500		3.136736534	2.101096962	ERF-1	ethylene responsive element binding factor 1;(source:Araport11)
AT4G17530		0.679386219	0.479048672	RAB1C	RAB GTPase homolog 1C;(source:Araport11)
AT4G17830		1.157370954	0.533486608	AT4G17830	Peptidase M20/M25/M40 family protein;(source:Araport11)
AT4G18010		1.380131742	0.466076386	IP5PII	myo-inositol polyphosphate 5-phosphatase 2;(source:Araport11)
AT4G18250		4.606250449	1.930748788	AT4G18250	receptor Serine/Threonine kinase-like protein;(source:Araport11)
AT4G18430		2.284258797	1.732262792	RABA1e	RAB GTPase homolog A1E;(source:Araport11)
AT4G18580		1.032945241		AT4G18580	hypothetical protein;(source:Araport11)
AT4G18880		1.395633772		HSF A4A	heat shock transcription factor A4A;(source:Araport11)
AT4G18950		2.877241658	1.977234551	AT4G18950	Integrin-linked protein kinase family;(source:Araport11)
AT4G19230		1.369500667	2.126482892	CYP707A1	cytochrome P450, family 707, subfamily A, polypeptide 1;(source:Araport11)
AT4G19880			1.067025168	AT4G19880	Glutathione S-transferase family protein;(source:Araport11)
AT4G20110			1.154323755	VSR7	VACUOLAR SORTING RECEPTOR 7;(source:Araport11)
AT4G20860		2.50509781	1.140522645	AT4G20860	FAD-binding Berberine family protein;(source:Araport11)
AT4G21390		4.038481813	2.170170667	B120	S-locus lectin protein kinase family protein;(source:Araport11)
AT4G21410		0.753664895	0.533548949	CRK29	cysteine-rich RLK (RECEPTOR-like protein kinase) 29;(source:Araport11)
AT4G21570		0.748419944	0.945817375	AT4G21570	organic solute transporter ostalpha protein (DUF300);(source:Araport11)
AT4G21830			3.528398166	MSRB7	methionine sulfoxide reductase B7;(source:Araport11)
AT4G21850			1.665197966	MSRB9	methionine sulfoxide reductase B9;(source:Araport11)
AT4G22240		0.966178257	0.477882041	AT4G22240	Plastid-lipid associated protein PAP / fibrillin family protein;(source:Araport11)
AT4G22710		8.24103319	3.942171361	CYP706A2	cytochrome P450, family 706, subfamily A, polypeptide 2;(source:Araport11)
AT4G22820		0.704519538	0.631480107	AT4G22820	A20/AN1-like zinc finger family protein;(source:Araport11)
AT4G22920		1.13717381	1.060183756	NYE1	non-yellowing 1;(source:Araport11)
AT4G23010		1.537744808	0.896639017	UTR2	UDP-galactose transporter 2;(source:Araport11)
AT4G23100		1.958734422	1.355526217	GSH1	glutamate-cysteine ligase;(source:Araport11)
AT4G23150		8.342137439	4.503596804	CRK7	cysteine-rich RLK (RECEPTOR-like protein kinase) 7;(source:Araport11)
AT4G23190		3.477127252	1.387846062	CRK11	cysteine-rich RLK (RECEPTOR-like protein kinase) 11;(source:Araport11)
AT4G23600		1.378975795	1.630582505	CORI3	Tyrosine transaminase family protein;(source:Araport11)
AT4G23700			0.911313711	CHX17	cation/H+ exchanger 17;(source:Araport11)
AT4G23710			0.730282264	VAG2	vacuolar ATP synthase subunit G2;(source:Araport11)
AT4G23730		0.953453577	0.660133758	AT4G23730	Galactose mutarotase-like superfamily protein;(source:Araport11)
AT4G23810		2.662620554		WRKY53	WRKY family transcription factor;(source:Araport11)
AT4G24000		5.483660692	3.406662068	CSLG2	cellulose synthase like G2;(source:Araport11)
AT4G24160		1.336178474	0.959634675	AT4G24160	alpha/beta-Hydrolases superfamily protein;(source:Araport11)
AT4G24290		0.918451289		AT4G24290	MAC/Perforin domain-containing protein;(source:Araport11)
AT4G24340		2.17488509	2.879178403	AT4G24340	Phosphorylase superfamily protein;(source:Araport11)
AT4G24350		1.115952012	1.202063187	AT4G24350	Phosphorylase superfamily protein;(source:Araport11)
AT4G24400		0.46870541		CIPK8	CBL-interacting protein kinase 8;(source:Araport11)
AT4G24920		0.932057422	1.109998965	AT4G24920	secE/sec61-gamma protein transport protein;(source:Araport11)
AT4G25030		1.676927316	0.901373854	AT4G25030	Serine/Threonine-kinase;(source:Araport11)
AT4G25670		1.093768752	0.817666108	AT4G25670	stress response NST1-like protein;(source:Araport11)
AT4G25810		4.680411232	2.809729172	XTR6	xyloglucan endotransglycosylase 6;(source:Araport11)
AT4G25900		2.589309554	1.88517665	AT4G25900	Galactose mutarotase-like superfamily protein;(source:Araport11)
AT4G26060		0.93372265	0.976697447	AT4G26060	Ribosomal protein L18ae family;(source:Araport11)
AT4G26120		3.892952045	1.059255496	AT4G26120	Ankyrin repeat family protein / BTB/POZ domain-containing protein;(source:Araport11)
AT4G26910		1.384996604	0.924476244	AT4G26910	Dihydrolipoamide succinyltransferase;(source:Araport11)
AT4G26970		0.946470339	0.515752166	ACO2	aconitase 2;(source:Araport11)
AT4G27070		3.712225792	2.696785113	TSB2	tryptophan synthase beta-subunit 2;(source:Araport11)
AT4G27260		1.548023962	0.668862618	WES1	Auxin-responsive GH3 family protein;(source:Araport11)
AT4G27300		1.89763947		AT4G27300	S-locus lectin protein kinase family protein;(source:Araport11)
AT4G27830		0.992999767	0.576939712	BGLU10	beta glucosidase 10;(source:Araport11)
AT4G28350		3.615166761	1.048595823	AT4G28350	Concanavalin A-like lectin protein kinase family protein;(source:Araport11)
AT4G28400		1.270444151	0.554349716	AT4G28400	Protein phosphatase 2C family protein;(source:Araport11)
AT4G28550		1.506990965	2.069773249	AT4G28550	Ypt/Rab-GAP domain of gyp1p superfamily protein;(source:Araport11)
AT4G29040		0.587783659	0.558163106	RPT2a	regulatory particle AAA-ATPase 2A;(source:Araport11)
AT4G29130			0.490924695	HXK1	hexokinase 1;(source:Araport11)
AT4G29670		0.919949728	0.623583528	ACHT2	atypical CYS HIS rich thioredoxin 2;(source:Araport11)
AT4G29700		0.943645564	1.335529478	AT4G29700	Alkaline-phosphatase-like family protein;(source:Araport11)
AT4G29810		1.042906622	0.72777391	MKK2	MAP kinase kinase 2;(source:Araport11)
AT4G30270		2.462514229	0.837944395	XTH24	xyloglucan endotransglucosylase/hydrolase 24;(source:Araport11)
AT4G30850			1.11135408	HHP2	heptahelical transmembrane protein2;(source:Araport11)
AT4G31550		1.338924279	0.945616835	WRKY11	WRKY DNA-binding protein 11;(source:Araport11)
AT4G31860		1.082446906	0.594882734	AT4G31860	Protein phosphatase 2C family protein;(source:Araport11)
AT4G32140		0.627590567	0.545704653	AT4G32140	EamA-like transporter family;(source:Araport11)
AT4G32250			0.869726892	AT4G32250	Protein kinase superfamily protein;(source:Araport11)
AT4G33540		1.350762534	0.798548624	AT4G33540	metallo-beta-lactamase family protein;(source:Araport11)
AT4G33920		2.402525761	0.841317564	AT4G33920	Protein phosphatase 2C family protein;(source:Araport11)
AT4G34050			1.412035967	CCoAOMT1	S-adenosyl-L-methionine-dependent methyltransferases superfamily protein;(source:Araport11)
AT4G34120		0.784151874	0.51703713	LEJ1	Cystathionine beta-synthase (CBS) family protein;(source:Araport11)
AT4G34150		2.204976523	1.311774505	AT4G34150	Calcium-dependent lipid-binding (CaLB domain) family protein;(source:Araport11)
AT4G34180		2.107431768	1.691216082	AT4G34180	Cyclase family protein;(source:Araport11)
AT4G34200		2.096336458	2.279991786	EDA9	D-3-phosphoglycerate dehydrogenase;(source:Araport11)
AT4G34230		2.317643826	1.462275128	CAD5	cinnamyl alcohol dehydrogenase 5;(source:Araport11)
AT4G34590			0.576194333	GBF6	G-box binding factor 6;(source:Araport11)
AT4G35110		2.712698872	1.858140213	AT4G35110	phospholipase-like protein (PEARLI 4) family protein;(source:Araport11)
AT4G35630		3.179544885	2.489764612	PSAT	phosphoserine aminotransferase;(source:Araport11)
AT4G36220		2.250270866	1.876710116	FAH1	ferulic acid 5-hydroxylase 1;(source:Araport11)
AT4G36500		2.599699591	1.360802603	AT4G36500	hypothetical protein;(source:Araport11)
AT4G36640		1.593441779	0.513250857	AT4G36640	Sec14p-like phosphatidylinositol transfer family protein;(source:Araport11)
AT4G36990		2.665348413	1.996518061	HSF4	heat shock factor 4;(source:Araport11)
AT4G37370		5.561804207	1.87561322	CYP81D8	cytochrome P450, family 81, subfamily D, polypeptide 8;(source:Araport11)
AT4G37390		5.699278485	3.259405144	BRU6	Auxin-responsive GH3 family protein;(source:Araport11)
AT4G37520		2.547387051	2.36423787	AT4G37520	Peroxidase superfamily protein;(source:Araport11)
AT4G37990		4.744177737	5.369032303	ELI3-2	cinnamyl alcohol dehydrogenase 8;(source:Araport11)
AT4G39030		2.400904307	2.096107018	EDS5	MATE efflux family protein;(source:Araport11)
AT4G39270		0.973485358	0.723894295	AT4G39270	Leucine-rich repeat protein kinase family protein;(source:Araport11)
AT4G39390		0.554709836	0.795099145	NST-K1	nucleotide sugar transporter-KT 1;(source:Araport11)
AT4G39580		3.575355053	2.149206471	AT4G39580	Galactose oxidase/kelch repeat superfamily protein;(source:Araport11)
AT4G39670		5.066777886	2.991437393	AT4G39670	Glycolipid transfer protein (GLTP) family protein;(source:Araport11)
AT4G39730			0.61225912	PLAT1	Lipase/lipooxygenase, PLAT/LH2 family protein;(source:Araport11)
AT4G39980		1.899499407	2.037940994	DHS1	3-deoxy-D-arabino-heptulosonate 7-phosphate synthase 1;(source:Araport11)
AT5G01210		1.948117443	1.094455815	AT5G01210	HXXXD-type acyl-transferase family protein;(source:Araport11)
AT5G02490		2.1576858		Hsp70-2	Heat shock protein 70 (Hsp 70) family protein;(source:Araport11)
AT5G04340		1.867067813	0.907969403	ZAT6	6;(source:Araport11)
AT5G04870		0.823286294	0.787117426	CPK1	calcium dependent protein kinase 1;(source:Araport11)
AT5G05730		4.551013318	3.124980369	ASA1	anthranilate synthase alpha subunit 1;(source:Araport11)
AT5G07440		2.6427452	1.41560266	GDH2	glutamate dehydrogenase 2;(source:Araport11)
AT5G08300		1.121384323	0.98744961	AT5G08300	Succinyl-CoA ligase, alpha subunit;(source:Araport11)
AT5G08790		2.174433476	1.260739463	ATAF2	NAC (No Apical Meristem) domain transcriptional regulator superfamily protein;(source:Araport11)
AT5G12480		1.204964977	0.422328908	CPK7	calmodulin-domain protein kinase 7;(source:Araport11)
AT5G13110			0.69118804	G6PD2	glucose-6-phosphate dehydrogenase 2;(source:Araport11)
AT5G13490		2.707955862	1.991320308	AAC2	ADP/ATP carrier 2;(source:Araport11)
AT5G13550		1.137996146	0.890237554	SULTR4;1	sulfate transporter 4.1;(source:Araport11)
AT5G15650			1.085998724	RGP2	reversibly glycosylated polypeptide 2;(source:Araport11)
AT5G17990		3.84416649	2.540068406	TRP1	tryptophan biosynthesis 1;(source:Araport11)
AT5G18070			0.747384897	DRT101	phosphoglucosamine mutase-like protein;(source:Araport11)
AT5G20960		2.281385546	0.547406617	AO1	aldehyde oxidase 1;(source:Araport11)
AT5G22300		3.44470756	2.273229918	NIT4	nitrilase 4;(source:Araport11)
AT5G24770			2.453565951	VSP2	vegetative storage protein 2;(source:Araport11)
AT5G25930		3.739412333	1.739944948	AT5G25930	kinase family with leucine-rich repeat domain-containing protein;(source:Araport11)
AT5G25940		1.176065029	1.27573031	AT5G25940	early nodulin-like protein;(source:Araport11)
AT5G26030		1.353353353	0.726002811	FC1	ferrochelatase 1;(source:Araport11)
AT5G26340		2.752977021	1.468137459	MSS1	Major facilitator superfamily protein;(source:Araport11)
AT5G26751		0.449103721		SK 11	shaggy-related kinase 11;(source:Araport11)
AT5G27380		1.661143257	0.828191638	GSH2	glutathione synthetase 2;(source:Araport11)
AT5G34930		1.007948582	1.026268604	AT5G34930	arogenate dehydrogenase;(source:Araport11)
AT5G36220		1.381432075	1.546164485	CYP81D1	cytochrome p450 81d1;(source:Araport11)
AT5G39950		0.932921123	0.734900682	TRX2	thioredoxin 2;(source:Araport11)
AT5G40760		0.713892776	0.827608957	G6PD6	glucose-6-phosphate dehydrogenase 6;(source:Araport11)
AT5G42020		1.658906137	2.340404131	BIP2	Heat shock protein 70 (Hsp 70) family protein;(source:Araport11)
AT5G42650		1.464263295	0.810717827	AOS	allene oxide synthase;(source:Araport11)
AT5G44070		1.148772416	0.717480435	CAD1	phytochelatin synthase 1 (PCS1);(source:Araport11)
AT5G44380		1.50552819	1.248321183	AT5G44380	FAD-binding Berberine family protein;(source:Araport11)
AT5G44420		4.664934955	2.186351489	PDF1.2	plant defensin 1.2;(source:Araport11)
AT5G44720		2.147979318	1.752902144	AT5G44720	Molybdenum cofactor sulfurase family protein;(source:Araport11)
AT5G47220		3.526531487	1.903514479	ERF2	ethylene responsive element binding factor 2;(source:Araport11)
AT5G47910		3.532535896	1.925592894	RBOHD	respiratory burst oxidase homologue D;(source:Araport11)
AT5G51060			0.843675586	RHD2	NADPH/respiratory burst oxidase protein D;(source:Araport11)
AT5G51070		1.547395475	0.729620186	ERD1	Clp ATPase;(source:Araport11)
AT5G52640		1.815675948		HSP90.1	heat shock-like protein;(source:Araport11)
AT5G54160		0.737931689	1.117982904	OMT1	O-methyltransferase 1;(source:Araport11)
AT5G54810		3.451351005	2.286063978	TSB1	tryptophan synthase beta-subunit 1;(source:Araport11)
AT5G54960		1.785534582		PDC2	pyruvate decarboxylase-2;(source:Araport11)
AT5G59820		3.647712282	1.273016069	RHL41	C2H2-type zinc finger family protein;(source:Araport11)
AT5G61520		0.66427374		AT5G61520	Major facilitator superfamily protein;(source:Araport11)
AT5G61790		1.378947023	1.362981568	CNX1	calnexin 1;(source:Araport11)
AT5G63980		1.899708764	1.447178009	SAL1	SAL1 phosphatase-like protein;(source:Araport11)
AT5G64120		3.247695978	1.191198722	AT5G64120	Peroxidase superfamily protein;(source:Araport11)
AT5G65360			0.920163591	AT5G65360	Histone superfamily protein;(source:Araport11)

## Sheet: Alternaria-induced genes relate
Common induced genes by A. brassicicola and regulated by JA. Gene symbol and TAIR description were taken from The Arabidopsis Information Resource (TAIR)
geneID	log2(FC)_3 DAS	log2(FC)_6 DAS	log2(FC)_10 DAS	Gene Symbol	TAIR Description
AT1G01480		5.843504547	2.268537913	ACS2	1-amino-cyclopropane-1-carboxylate synthase 2;(source:Araport11)
AT1G01720	1.342680382	0.928138721	0.668515263	ATAF1	NAC (No Apical Meristem) domain transcriptional regulator superfamily protein;(source:Araport11)
AT1G03220		3.326418755	1.855311465	AT1G03220	Eukaryotic aspartyl protease family protein;(source:Araport11)
AT1G03230		0.731785931	1.389019901	AT1G03230	Eukaryotic aspartyl protease family protein;(source:Araport11)
AT1G05680		1.430679123	1.312277725	UGT74E2	Uridine diphosphate glycosyltransferase 74E2;(source:Araport11)
AT1G06180		1.511172266	2.445369569	MYB13	myb domain protein 13;(source:Araport11)
AT1G07890		0.864312219	0.575569806	APX1	ascorbate peroxidase 1;(source:Araport11)
AT1G08630		0.789768435		THA1	threonine aldolase 1;(source:Araport11)
AT1G09480		2.994475319	1.284141005	AT1G09480	NAD(P)-binding Rossmann-fold superfamily protein;(source:Araport11)
AT1G09500		5.17735393	2.818226425	AT1G09500	NAD(P)-binding Rossmann-fold superfamily protein;(source:Araport11)
AT1G09630		0.878896924	1.213035725	RAB11c	RAB GTPase 11C;(source:Araport11)
AT1G09740			1.174499964	AT1G09740	Adenine nucleotide alpha hydrolases-like superfamily protein;(source:Araport11)
AT1G10070		0.920157986		BCAT-2	branched-chain amino acid transaminase 2;(source:Araport11)
AT1G10140		2.168544862	1.405850373	AT1G10140	Uncharacterized conserved protein UCP031279;(source:Araport11)
AT1G11050		2.480871522	1.144906231	AT1G11050	Protein kinase superfamily protein;(source:Araport11)
AT1G11580			1.14348997	PMEPCRA	methylesterase PCR A;(source:Araport11)
AT1G13110		0.877017777	0.779142362	CYP71B7	cytochrome P450, family 71 subfamily B, polypeptide 7;(source:Araport11)
AT1G17020		1.144990062	2.271855127	SRG1	senescence-related gene 1;(source:Araport11)
AT1G17420		3.170768475	1.912556826	LOX3	lipoxygenase 3;(source:Araport11)
AT1G17745		2.909510595	2.571663057	PGDH	D-3-phosphoglycerate dehydrogenase;(source:Araport11)
AT1G19670		1.137398003	2.467697248	CLH1	chlorophyllase 1;(source:Araport11)
AT1G22360		0.922142432	1.216521904	UGT85A2	UDP-glucosyl transferase 85A2;(source:Araport11)
AT1G24100		3.019660841	2.056076168	UGT74B1	UDP-glucosyl transferase 74B1;(source:Araport11)
AT1G24625		0.731221213		ZFP7	zinc finger protein 7;(source:Araport11)
AT1G26930		1.441251518	1.623207831	AT1G26930	Galactose oxidase/kelch repeat superfamily protein;(source:Araport11)
AT1G27130		1.090057366		GSTU13	glutathione S-transferase tau 13;(source:Araport11)
AT1G27730		4.230889045	1.893552254	STZ	salt tolerance zinc finger;(source:Araport11)
AT1G29330		0.489527182	0.936082487	ERD2	ER lumen protein retaining receptor family protein;(source:Araport11)
AT1G44350		1.539544081	2.023961791	ILL6	IAA-amino acid hydrolase ILR1-like 6;(source:Araport11)
AT1G45145		1.97421422	2.053585367	TRX5	thioredoxin H-type 5;(source:Araport11)
AT1G51760		3.121509036	2.449910645	IAR3	peptidase M20/M25/M40 family protein;(source:Araport11)
AT1G52030			3.634306303	MBP2	myrosinase-binding protein 2;(source:Araport11)
AT1G54000			1.098402027	GLL22	GDSL-like Lipase/Acylhydrolase superfamily protein;(source:Araport11)
AT1G54010			0.906243634	AT1G54010	GDSL-like Lipase/Acylhydrolase superfamily protein;(source:Araport11)
AT1G54030			0.777793675	MVP1	GDSL-like Lipase/Acylhydrolase superfamily protein;(source:Araport11)
AT1G55020		4.676069705	4.381958256	LOX1	lipoxygenase 1;(source:Araport11)
AT1G55920		2.31302405	1.40547188	SERAT2;1	serine acetyltransferase 2;(source:Araport11)
AT1G59950		5.158346534	4.234257717	AT1G59950	NAD(P)-linked oxidoreductase superfamily protein;(source:Araport11)
AT1G59960		0.779352054	1.41681486	AT1G59960	NAD(P)-linked oxidoreductase superfamily protein;(source:Araport11)
AT1G59970			0.686444461	AT1G59970	Matrixin family protein;(source:Araport11)
AT1G60610		1.611729357	0.720035047	AT1G60610	SBP (S-ribonuclease binding protein) family protein;(source:Araport11)
AT1G60710			0.321364371	ATB2	NAD(P)-linked oxidoreductase superfamily protein;(source:Araport11)
AT1G61120		5.514388537	3.539535757	TPS04	terpene synthase 04;(source:Araport11)
AT1G61610		5.120256664	4.523084099	AT1G61610	S-locus lectin protein kinase family protein;(source:Araport11)
AT1G61810		3.175033408	2.004529893	BGLU45	beta-glucosidase 45;(source:Araport11)
AT1G61890			0.875369075	AT1G61890	MATE efflux family protein;(source:Araport11)
AT1G62200		1.406418139	1.058810725	PTR6	Major facilitator superfamily protein;(source:Araport11)
AT1G62570		1.428836309		FMO GS-OX4	flavin-monooxygenase glucosinolate S-oxygenase 4;(source:Araport11)
AT1G64710		1.212772632		AT1G64710	GroES-like zinc-binding alcohol dehydrogenase family protein;(source:Araport11)
AT1G64900		0.87193649		CYP89A2	cytochrome P450, family 89, subfamily A, polypeptide 2;(source:Araport11)
AT1G67980		7.771508312	2.224515771	CCOAMT	caffeoyl-CoA 3-O-methyltransferase;(source:Araport11)
AT1G74020		1.145802667	1.083363069	SS2	strictosidine synthase 2;(source:Araport11)
AT1G75830		2.586531014		LCR67	low-molecular-weight cysteine-rich 67;(source:Araport11)
AT1G77380		2.065150803	0.704396053	AAP3	amino acid permease 3;(source:Araport11)
AT1G80300		2.226957242	1.664228857	NTT1	nucleotide transporter 1;(source:Araport11)
AT2G01340		2.329828637	1.703652302	At17.1	plastid movement impaired protein;(source:Araport11)
AT2G03240		0.762509847		AT2G03240	EXS (ERD1/XPR1/SYG1) family protein;(source:Araport11)
AT2G03980			0.805113485	AT2G03980	GDSL-like Lipase/Acylhydrolase superfamily protein;(source:Araport11)
AT2G06050		1.570419348	1.575640728	OPR3	oxophytodienoate-reductase 3;(source:Araport11)
AT2G14290		6.368406238	3.758158669	AT2G14290	LL-diaminopimelate protein (DUF295);(source:Araport11)
AT2G14750		1.950660058	1.262290592	APK	APS kinase;(source:Araport11)
AT2G20900		1.903039131	1.160021355	DGK5	diacylglycerol kinase 5;(source:Araport11)
AT2G21620		1.097899889	1.397118166	RD2	Adenine nucleotide alpha hydrolases-like superfamily protein;(source:Araport11)
AT2G22250		2.003296109	1.76677115	AAT	aspartate aminotransferase;(source:Araport11)
AT2G22330		4.132648266	2.577039389	CYP79B3	cytochrome P450, family 79, subfamily B, polypeptide 3;(source:Araport11)
AT2G22860		1.764279748	1.407082745	PSK2	phytosulfokine 2 precursor;(source:Araport11)
AT2G23150		1.926072018	1.030313879	NRAMP3	natural resistance-associated macrophage protein 3;(source:Araport11)
AT2G23170		4.895601052	4.244035507	GH3.3	Auxin-responsive GH3 family protein;(source:Araport11)
AT2G24100		1.089876742		ASG1	ATP-dependent DNA helicase;(source:Araport11)
AT2G24180		4.607783254	2.740856276	CYP71B6	cytochrome p450 71b6;(source:Araport11)
AT2G24850			2.439833061	TAT3	tyrosine aminotransferase 3;(source:Araport11)
AT2G26650		1.121855886	0.397295133	KT1	K+ transporter 1;(source:Araport11)
AT2G27310		2.209064227	1.399528542	AT2G27310	F-box family protein;(source:Araport11)
AT2G27690		3.327897099	2.916141603	CYP94C1	cytochrome P450, family 94, subfamily C, polypeptide 1;(source:Araport11)
AT2G27820		0.786406062	0.811553874	PD1	prephenate dehydratase 1;(source:Araport11)
AT2G28210		2.860536563	3.772665694	ACA2	alpha carbonic anhydrase 2;(source:Araport11)
AT2G29340		2.010481207		AT2G29340	NAD-dependent epimerase/dehydratase family protein;(source:Araport11)
AT2G29410		3.603404703	2.121883965	MTPB1	metal tolerance protein B1;(source:Araport11)
AT2G29440		1.648580568	2.600036668	GSTU6	glutathione S-transferase tau 6;(source:Araport11)
AT2G29460		6.139683462	5.174410498	GSTU4	glutathione S-transferase tau 4;(source:Araport11)
AT2G29470		6.568278571	6.728286399	GSTU3	glutathione S-transferase tau 3;(source:Araport11)
AT2G29490		1.274132827	1.029637579	GSTU1	glutathione S-transferase TAU 1;(source:Araport11)
AT2G29500		1.112843376		AT2G29500	HSP20-like chaperones superfamily protein;(source:Araport11)
AT2G29720		3.314043002	2.037339532	CTF2B	FAD/NAD(P)-binding oxidoreductase family protein;(source:Araport11)
AT2G30360		1.826937264	1.269162132	SIP4	SOS3-interacting protein 4;(source:Araport11)
AT2G30770		13.43495006	6.821609849	CYP71A13	cytochrome P450 family 71 polypeptide;(source:Araport11)
AT2G30840			0.490379009	AT2G30840	2-oxoglutarate (2OG) and Fe(II)-dependent oxygenase superfamily protein;(source:Araport11)
AT2G30870		2.069778923	2.019759182	GSTF10	glutathione S-transferase PHI 10;(source:Araport11)
AT2G31230		3.752974708	2.288504504	ERF15	ethylene-responsive element binding factor 15;(source:Araport11)
AT2G32400			0.743802649	GLR5	glutamate receptor 5;(source:Araport11)
AT2G34070			0.735962233	TBL37	TRICHOME BIREFRINGENCE-LIKE 37;(source:Araport11)
AT2G34810			1.776879856	AT2G34810	FAD-binding Berberine family protein;(source:Araport11)
AT2G34930		3.607625734	3.577649105	AT2G34930	disease resistance family protein / LRR family protein;(source:Araport11)
AT2G36950		1.962479058	1.251757277	AT2G36950	Heavy metal transport/detoxification superfamily protein;(source:Araport11)
AT2G36970		1.998424593	0.749699173	AT2G36970	UDP-Glycosyltransferase superfamily protein;(source:Araport11)
AT2G37770		1.739490654	2.565199236	ChlAKR	NAD(P)-linked oxidoreductase superfamily protein;(source:Araport11)
AT2G38240		8.300084004	3.967776019	AT2G38240	2-oxoglutarate (2OG) and Fe(II)-dependent oxygenase superfamily protein;(source:Araport11)
AT2G39330			4.217690051	JAL23	jacalin-related lectin 23;(source:Araport11)
AT2G39420			1.052611378	AT2G39420	alpha/beta-Hydrolases superfamily protein;(source:Araport11)
AT2G41180		1.387363737	1.774413835	SIB2	VQ motif-containing protein;(source:Araport11)
AT2G41380		3.008197443	1.14025374	AT2G41380	S-adenosyl-L-methionine-dependent methyltransferases superfamily protein;(source:Araport11)
AT2G41410		1.420927364	0.539888943	AT2G41410	Calcium-binding EF-hand family protein;(source:Araport11)
AT2G42760		0.926582382	0.868669746	AT2G42760	DUF1685 family protein;(source:Araport11)
AT2G42980		3.993491666	1.422833944	AT2G42980	Eukaryotic aspartyl protease family protein;(source:Araport11)
AT2G43150		1.377043117	2.283513232	AT2G43150	Proline-rich extensin-like family protein;(source:Araport11)
AT2G43510		3.300835994	2.512013236	TI1	trypsin inhibitor protein 1;(source:Araport11)
AT2G43530			0.984778935	AT2G43530	scorpion toxin-like knottin superfamily protein;(source:Araport11)
AT2G43590		4.682153306		AT2G43590	Chitinase family protein;(source:Araport11)
AT2G44350		1.050891337	0.782270893	ATCS	Citrate synthase family protein;(source:Araport11)
AT2G44840		3.138997497	1.909731725	ERF13	ethylene-responsive element binding factor 13;(source:Araport11)
AT2G45220		3.712532993	3.676630565	AT2G45220	Plant invertase/pectin methylesterase inhibitor superfamily;(source:Araport11)
AT2G45290			1.278743821	AT2G45290	Transketolase;(source:Araport11)
AT2G45570		8.868140058	5.802780886	CYP76C2	cytochrome P450, family 76, subfamily C, polypeptide 2;(source:Araport11)
AT2G46140		1.031476477	1.45248382	AT2G46140	Late embryogenesis abundant protein;(source:Araport11)
AT2G47650		0.999017607	1.568319107	UXS4	UDP-xylose synthase 4;(source:Araport11)
AT3G01930		0.674013546		AT3G01930	Major facilitator superfamily protein;(source:Araport11)
AT3G02875		1.123365863	1.538916004	ILR1	Peptidase M20/M25/M40 family protein;(source:Araport11)
AT3G04720		3.399967899	3.163201876	PR4	pathogenesis-related 4;(source:Araport11)
AT3G08720		1.334762201	1.086590515	S6K2	serine/threonine protein kinase 2;(source:Araport11)
AT3G08760		1.544404846		ATSIK	Protein kinase superfamily protein;(source:Araport11)
AT3G11900		1.375086288	0.341488288	ANT1	aromatic and neutral transporter 1;(source:Araport11)
AT3G12500			2.667322373	HCHIB	basic chitinase;(source:Araport11)
AT3G14310			0.540104473	PME3	pectin methylesterase 3;(source:Araport11)
AT3G15210		1.856265582	1.047064682	ERF4	ethylene responsive element binding factor 4;(source:Araport11)
AT3G15356		5.266246385	3.737560172	AT3G15356	Legume lectin family protein;(source:Araport11)
AT3G16500		0.936899582		PAP1	phytochrome-associated protein 1;(source:Araport11)
AT3G21240		1.629631195	1.866849737	4CL2	4-coumarate:CoA ligase 2;(source:Araport11)
AT3G22370		1.478279271		AOX1A	alternative oxidase 1A;(source:Araport11)
AT3G23030		1.800738639	0.431589962	IAA2	indole-3-acetic acid inducible 2;(source:Araport11)
AT3G23240		5.524676573	3.519639084	ERF1	ethylene response factor 1;(source:Araport11)
AT3G24170		1.577310525	1.274698095	GR1	glutathione-disulfide reductase;(source:Araport11)
AT3G28930		5.156955956	4.317898753	AIG2	AIG2-like (avirulence induced gene) family protein;(source:Araport11)
AT3G45140		2.445363669	3.376273049	LOX2	lipoxygenase 2;(source:Araport11)
AT3G47420		2.704865299		G3Pp1	putative glycerol-3-phosphate transporter 1;(source:Araport11)
AT3G48890		2.729026682	1.869930304	MAPR3	membrane-associated progesterone binding protein 3;(source:Araport11)
AT3G49120		2.656476278	2.143949113	PRXCB	peroxidase CB;(source:Araport11)
AT3G50760		2.788748301	2.694084714	GATL2	galacturonosyltransferase-like 2;(source:Araport11)
AT3G50770		4.640845598	1.870283233	CML41	calmodulin-like 41;(source:Araport11)
AT3G54110		0.990323084	1.089266597	PUMP1	plant uncoupling mitochondrial protein 1;(source:Araport11)
AT3G57630		1.813035297	1.444817654	AT3G57630	exostosin family protein;(source:Araport11)
AT3G60140		3.42096886	1.936771519	DIN2	Glycosyl hydrolase superfamily protein;(source:Araport11)
AT4G02200		0.922453754		AT4G02200	Drought-responsive family protein;(source:Araport11)
AT4G03420		1.497337311	0.431807631	AT4G03420	hypothetical protein (DUF789);(source:Araport11)
AT4G04610		2.891276119	1.656860751	APR1	APS reductase 1;(source:Araport11)
AT4G08390		0.430781215	0.446142341	SAPX	stromal ascorbate peroxidase;(source:Araport11)
AT4G10040		1.409923862	0.635783425	CYTC-2	cytochrome c-2;(source:Araport11)
AT4G11650		2.701530475	2.539631734	OSM34	osmotin 34;(source:Araport11)
AT4G12040		0.567781479	0.380493655	SAP7	A20/AN1-like zinc finger family protein;(source:Araport11)
AT4G14680		2.14717143	1.256923859	APS3	Pseudouridine synthase/archaeosine transglycosylase-like family protein;(source:Araport11)
AT4G15610		1.383573641	0.922855496	AT4G15610	Uncharacterized protein family (UPF0497);(source:Araport11)
AT4G16260		3.481956385	3.716097622	AT4G16260	Glycosyl hydrolase superfamily protein;(source:Araport11)
AT4G16500		0.500657576	0.565367971	AT4G16500	Cystatin/monellin superfamily protein;(source:Araport11)
AT4G17070		1.33872211	0.825205979	AT4G17070	peptidyl-prolyl cis-trans isomerase;(source:Araport11)
AT4G17230		1.377056258	0.487178503	SCL13	SCARECROW-like 13;(source:Araport11)
AT4G17490		4.880776276	3.084355535	ERF6	ethylene responsive element binding factor 6;(source:Araport11)
AT4G17500		3.136736534	2.101096962	ERF-1	ethylene responsive element binding factor 1;(source:Araport11)
AT4G18360			0.761935866	GOX3	Aldolase-type TIM barrel family protein;(source:Araport11)
AT4G18950		2.877241658	1.977234551	AT4G18950	Integrin-linked protein kinase family;(source:Araport11)
AT4G19230		1.369500667	2.126482892	CYP707A1	cytochrome P450, family 707, subfamily A, polypeptide 1;(source:Araport11)
AT4G19450		0.944434985		AT4G19450	Major facilitator superfamily protein;(source:Araport11)
AT4G21390		4.038481813	2.170170667	B120	S-locus lectin protein kinase family protein;(source:Araport11)
AT4G21410		0.753664895	0.533548949	CRK29	cysteine-rich RLK (RECEPTOR-like protein kinase) 29;(source:Araport11)
AT4G21830			3.528398166	MSRB7	methionine sulfoxide reductase B7;(source:Araport11)
AT4G21850			1.665197966	MSRB9	methionine sulfoxide reductase B9;(source:Araport11)
AT4G22240		0.966178257	0.477882041	AT4G22240	Plastid-lipid associated protein PAP / fibrillin family protein;(source:Araport11)
AT4G23100		1.958734422	1.355526217	GSH1	glutamate-cysteine ligase;(source:Araport11)
AT4G23600		1.378975795	1.630582505	CORI3	Tyrosine transaminase family protein;(source:Araport11)
AT4G23700			0.911313711	CHX17	cation/H+ exchanger 17;(source:Araport11)
AT4G24000		5.483660692	3.406662068	CSLG2	cellulose synthase like G2;(source:Araport11)
AT4G24340		2.17488509	2.879178403	AT4G24340	Phosphorylase superfamily protein;(source:Araport11)
AT4G24350		1.115952012	1.202063187	AT4G24350	Phosphorylase superfamily protein;(source:Araport11)
AT4G25030		1.676927316	0.901373854	AT4G25030	Serine/Threonine-kinase;(source:Araport11)
AT4G25230		0.984756408	0.867166234	RIN2	RPM1 interacting protein 2;(source:Araport11)
AT4G25390		2.320070224	1.810447687	AT4G25390	Protein kinase superfamily protein;(source:Araport11)
AT4G27070		3.712225792	2.696785113	TSB2	tryptophan synthase beta-subunit 2;(source:Araport11)
AT4G27300		1.89763947		AT4G27300	S-locus lectin protein kinase family protein;(source:Araport11)
AT4G28550		1.506990965	2.069773249	AT4G28550	Ypt/Rab-GAP domain of gyp1p superfamily protein;(source:Araport11)
AT4G29670		0.919949728	0.623583528	ACHT2	atypical CYS HIS rich thioredoxin 2;(source:Araport11)
AT4G29700		0.943645564	1.335529478	AT4G29700	Alkaline-phosphatase-like family protein;(source:Araport11)
AT4G30270		2.462514229	0.837944395	XTH24	xyloglucan endotransglucosylase/hydrolase 24;(source:Araport11)
AT4G31860		1.082446906	0.594882734	AT4G31860	Protein phosphatase 2C family protein;(source:Araport11)
AT4G32250			0.869726892	AT4G32250	Protein kinase superfamily protein;(source:Araport11)
AT4G33540		1.350762534	0.798548624	AT4G33540	metallo-beta-lactamase family protein;(source:Araport11)
AT4G34200		2.096336458	2.279991786	EDA9	D-3-phosphoglycerate dehydrogenase;(source:Araport11)
AT4G34210		1.996509779		SK11	SKP1-like 11;(source:Araport11)
AT4G34230		2.317643826	1.462275128	CAD5	cinnamyl alcohol dehydrogenase 5;(source:Araport11)
AT4G34590			0.576194333	GBF6	G-box binding factor 6;(source:Araport11)
AT4G35630		3.179544885	2.489764612	PSAT	phosphoserine aminotransferase;(source:Araport11)
AT4G36220		2.250270866	1.876710116	FAH1	ferulic acid 5-hydroxylase 1;(source:Araport11)
AT4G36480		0.714755045		LCB1	long-chain base1;(source:Araport11)
AT4G36500		2.599699591	1.360802603	AT4G36500	hypothetical protein;(source:Araport11)
AT4G36640		1.593441779	0.513250857	AT4G36640	Sec14p-like phosphatidylinositol transfer family protein;(source:Araport11)
AT4G36990		2.665348413	1.996518061	HSF4	heat shock factor 4;(source:Araport11)
AT4G37390		5.699278485	3.259405144	BRU6	Auxin-responsive GH3 family protein;(source:Araport11)
AT4G37520		2.547387051	2.36423787	AT4G37520	Peroxidase superfamily protein;(source:Araport11)
AT4G37990		4.744177737	5.369032303	ELI3-2	cinnamyl alcohol dehydrogenase 8;(source:Araport11)
AT4G38540		1.759840071	1.185918564	AT4G38540	FAD/NAD(P)-binding oxidoreductase family protein;(source:Araport11)
AT4G39580		3.575355053	2.149206471	AT4G39580	Galactose oxidase/kelch repeat superfamily protein;(source:Araport11)
AT5G01210		1.948117443	1.094455815	AT5G01210	HXXXD-type acyl-transferase family protein;(source:Araport11)
AT5G04340		1.867067813	0.907969403	ZAT6	6;(source:Araport11)
AT5G04590		1.204783811	0.353164304	SIR	sulfite reductase;(source:Araport11)
AT5G05730		4.551013318	3.124980369	ASA1	anthranilate synthase alpha subunit 1;(source:Araport11)
AT5G07440		2.6427452	1.41560266	GDH2	glutamate dehydrogenase 2;(source:Araport11)
AT5G13110			0.69118804	G6PD2	glucose-6-phosphate dehydrogenase 2;(source:Araport11)
AT5G13490		2.707955862	1.991320308	AAC2	ADP/ATP carrier 2;(source:Araport11)
AT5G13550		1.137996146	0.890237554	SULTR4;1	sulfate transporter 4.1;(source:Araport11)
AT5G18070			0.747384897	DRT101	phosphoglucosamine mutase-like protein;(source:Araport11)
AT5G21105		0.951280743		AT5G21105	Plant L-ascorbate oxidase;(source:Araport11)
AT5G22300		3.44470756	2.273229918	NIT4	nitrilase 4;(source:Araport11)
AT5G24770			2.453565951	VSP2	vegetative storage protein 2;(source:Araport11)
AT5G27380		1.661143257	0.828191638	GSH2	glutathione synthetase 2;(source:Araport11)
AT5G34930		1.007948582	1.026268604	AT5G34930	arogenate dehydrogenase;(source:Araport11)
AT5G36220		1.381432075	1.546164485	CYP81D1	cytochrome p450 81d1;(source:Araport11)
AT5G40760		0.713892776	0.827608957	G6PD6	glucose-6-phosphate dehydrogenase 6;(source:Araport11)
AT5G42650		1.464263295	0.810717827	AOS	allene oxide synthase;(source:Araport11)
AT5G44380		1.50552819	1.248321183	AT5G44380	FAD-binding Berberine family protein;(source:Araport11)
AT5G44420		4.664934955	2.186351489	PDF1.2	plant defensin 1.2;(source:Araport11)
AT5G47220		3.526531487	1.903514479	ERF2	ethylene responsive element binding factor 2;(source:Araport11)
AT5G47910		3.532535896	1.925592894	RBOHD	respiratory burst oxidase homologue D;(source:Araport11)
AT5G51060			0.843675586	RHD2	NADPH/respiratory burst oxidase protein D;(source:Araport11)
AT5G51070		1.547395475	0.729620186	ERD1	Clp ATPase;(source:Araport11)
AT5G54810		3.451351005	2.286063978	TSB1	tryptophan synthase beta-subunit 1;(source:Araport11)
AT5G54960		1.785534582		PDC2	pyruvate decarboxylase-2;(source:Araport11)
AT5G61520		0.66427374		AT5G61520	Major facilitator superfamily protein;(source:Araport11)
AT5G63980		1.899708764	1.447178009	SAL1	SAL1 phosphatase-like protein;(source:Araport11)
AT5G67300			0.4088488	MYBR1	myb domain protein r1;(source:Araport11)
